# Supplementary material for: Protective Effects of Hong Shan Capsule against Lethal Total-Body Irradiation-Induced Damage in Wistar Rats
Source: Int J Mol Sci. 2015 Aug 12;16(8):18938–55. doi: 10.3390/ijms160818938 (PMC4581280; doi:10.3390/ijms160818938)
Supplement: Supplementary file 1 [file ijms-16-18938-s001.xls]

## Sheet: additional file 1
Probe Set	C41_NS	C42_NS	C43_NS	H21_NS	H22_NS	H23_NS	M1_NS	M3_NS	M5_NS	p Values	q Values	mean 1	mean 2	mean 3	std var 1	std var 2	std var 3
A_42_P455863	14.1198	14.0283	14.0205	14.2758	14.2234	14.3498	14.2554	14.2095	14.2554	0.00349048	0.0295482	14.0562	14.2401	14.283	0.0552332	0.0265021	0.0635203
A_42_P462015	8.85408	8.72561	8.89922	8.37111	8.32311	8.57173	8.21272	8.48006	8.40477	0.00689786	0.0376502	8.82631	8.36585	8.42198	0.0900777	0.137854	0.131889
A_42_P462354	9.00381	8.61153	8.97492	9.64437	9.52257	9.59734	9.81863	9.41548	9.78041	0.00309581	0.0283097	8.86342	9.6715	9.58809	0.21862	0.222549	0.061424
A_42_P462987	9.90381	9.78923	9.89605	9.4302	9.55464	9.61545	9.6255	9.3988	9.34917	0.00794551	0.0396084	9.86303	9.45782	9.53343	0.0640292	0.14732	0.0944277
A_42_P468231	3.68088	4.31437	4.08543	3.75186	4.46981	3.96588	5.48724	5.46156	5.06732	0.00333182	0.0290636	4.0269	5.33871	4.06251	0.320776	0.235381	0.368604
A_42_P470283	1.85091	1.73411	1.73109	1.67916	1.5742	1.59968	1.52646	1.51563	1.5317	0.00284226	0.0275429	1.77204	1.5246	1.61768	0.0683267	0.0081953	0.0547466
A_42_P472133	6.11848	7.66632	7.07836	4.80262	4.81522	4.94035	5.98302	7.14421	6.6202	0.0082258	0.0401697	6.95439	6.58248	4.85273	0.781331	0.581514	0.0761417
A_42_P472375	13.6946	13.6807	13.972	13.3097	13.1278	13.2514	13.1149	13.1628	13.3582	0.0028619	0.0275575	13.7824	13.2119	13.2296	0.164311	0.128887	0.0928613
A_42_P472590	4.32845	4.91534	4.55826	4.2967	4.31701	3.73063	3.48622	3.22615	3.60249	0.00655225	0.0369007	4.60069	3.43829	4.11478	0.295734	0.192693	0.332839
A_42_P478500	11.6086	11.5011	11.5056	11.1957	11.134	11.2503	11.2418	11.1753	11.161	0.000338726	0.0122151	11.5385	11.1927	11.1933	0.0608211	0.0430817	0.0581831
A_42_P480723	5.91384	6.00744	6.80108	5.36716	5.46326	5.499	6.88383	7.47688	6.74203	0.00508306	0.0333674	6.24079	7.03425	5.44314	0.487476	0.389833	0.0681845
A_42_P481516	12.736	12.7977	12.9973	12.6937	12.7015	12.7846	12.4914	12.4213	12.5382	0.00752316	0.0388156	12.8437	12.4836	12.7266	0.136579	0.0588572	0.0503761
A_42_P481816	7.90766	7.99236	8.15832	7.77527	7.76965	7.75065	8.05846	8.05881	8.01318	0.00724352	0.0383451	8.01945	8.04348	7.76519	0.127508	0.0262435	0.0129019
A_42_P484663	7.79942	7.9453	8.09304	7.05917	7.15634	7.17484	7.04919	7.14131	7.15312	6.65171e-05	0.00705742	7.94592	7.11454	7.13011	0.14681	0.0569024	0.0621347
A_42_P485961	1.6376	1.6128	1.59601	1.49159	1.49384	1.48801	1.45657	1.44774	1.49267	0.000124581	0.00887492	1.61547	1.46566	1.49115	0.0209247	0.0238072	0.00293854
A_42_P486517	11.1965	11.1965	11.161	11.2876	11.2568	11.3205	11.3648	11.4694	11.3571	0.00255613	0.0264269	11.1847	11.3971	11.2883	0.0204676	0.0626955	0.0318103
A_42_P486763	13.5946	13.4308	13.523	12.6619	12.6773	12.5949	12.7645	12.8908	13.0695	0.000132138	0.00898541	13.5161	12.9082	12.6447	0.0821321	0.153264	0.0438244
A_42_P489167	9.40874	9.68698	9.70655	8.35115	8.6479	8.68929	8.96653	9.52762	9.37858	0.00314606	0.0285047	9.60075	9.29091	8.56278	0.16658	0.290639	0.184441
A_42_P490296	8.97619	8.75714	8.96735	8.9126	8.92581	8.82637	9.16837	9.14863	9.1803	0.00809184	0.0399134	8.90022	9.16577	8.88826	0.123994	0.0159925	0.0540033
A_42_P490305	11.3899	11.4	11.1705	10.3469	10.2338	10.257	9.47964	9.88406	9.95164	8.38141e-05	0.007611	11.3201	9.77178	10.2792	0.129694	0.255246	0.0597648
A_42_P490576	7.33497	7.21094	7.18981	6.67407	6.62753	6.86994	6.50321	6.75436	6.50817	0.00123272	0.0195355	7.24524	6.58858	6.72385	0.0784241	0.143589	0.128644
A_42_P493301	4.37622	3.35368	3.93489	2.15262	2.5158	2.30937	1.8999	2.49397	2.39277	0.00246199	0.0260374	3.88826	2.26221	2.32593	0.512858	0.317829	0.182152
A_42_P495128	2.18049	1.9113	1.95844	1.88412	1.64907	1.85337	1.56274	1.54473	1.47507	0.00569	0.0348576	2.01674	1.52751	1.79552	0.143753	0.0463046	0.127756
A_42_P495741	3.32434	2.95406	2.94509	2.39059	1.6428	2.93759	4.35663	4.13797	4.13631	0.00351599	0.0295667	3.0745	4.2103	2.32366	0.216415	0.126728	0.649984
A_42_P497323	9.64554	10.2395	10.1709	10.9498	10.7768	10.3373	10.9715	11.3571	11.2728	0.00680774	0.0375946	10.0186	11.2005	10.688	0.32493	0.202759	0.315777
A_42_P499859	6.56149	6.35614	6.7893	5.93342	5.67289	6.12446	5.57685	5.66693	5.67262	0.00212206	0.0243264	6.56898	5.6388	5.91026	0.216672	0.0537276	0.226672
A_42_P501233	1.7394	1.63871	1.64371	1.62974	1.54114	1.56495	1.49045	1.48945	1.5154	0.00718733	0.0381827	1.67394	1.49843	1.57861	0.0567435	0.0147008	0.0458539
A_42_P502271	4.75063	4.68472	3.90033	4.39153	4.37743	4.42052	5.74682	5.60866	5.56399	0.00249243	0.0261768	4.44523	5.63983	4.39649	0.473044	0.0953159	0.0219719
A_42_P504077	10.2	10.1525	10.3548	9.97189	9.95242	9.99275	9.84604	9.61062	9.45262	0.00394248	0.0305339	10.2357	9.63642	9.97235	0.105775	0.197974	0.0201665
A_42_P504926	5.18189	5.27708	4.91534	4.84306	5.16649	5.02937	5.79972	5.83646	5.60237	0.00285258	0.0275429	5.12477	5.74618	5.01298	0.187511	0.125893	0.162336
A_42_P506402	12.5855	14.3745	13.2125	15.3315	15.0083	14.5354	15.4629	15.5315	15.7575	0.00904922	0.0416911	13.3908	15.584	14.9584	0.907727	0.154114	0.4004
A_42_P508185	9.0858	9.25418	9.11672	8.23924	8.14484	8.38667	8.34394	8.63489	8.61565	0.000381682	0.0124518	9.15224	8.53149	8.25691	0.0896325	0.16271	0.121882
A_42_P509314	4.63972	4.36375	4.34362	4.54408	4.59095	5.00164	5.82265	5.60558	5.5451	0.000605696	0.0143829	4.44903	5.65778	4.71223	0.165449	0.14595	0.251732
A_42_P511401	10.3951	11.218	11.3397	9.35817	9.57617	9.89986	10.2895	10.6235	10.2791	0.00916605	0.0418505	10.9843	10.3974	9.6114	0.513899	0.195895	0.272561
A_42_P512860	1.58991	1.52404	1.56255	1.53522	1.4992	1.51274	1.45064	1.45002	1.45756	0.00302283	0.0279836	1.55884	1.45274	1.51572	0.0330903	0.00418643	0.018196
A_42_P513294	6.95693	6.66423	6.91646	6.51125	6.14422	6.25799	5.83126	5.78642	5.66256	0.000365527	0.0124518	6.84587	5.76008	6.30449	0.158602	0.0873822	0.187881
A_42_P514585	16.9678	16.7565	16.7063	17.1154	17.1278	17.1923	17.1923	17.2905	17.4432	0.00411152	0.0309449	16.8102	17.3087	17.1451	0.138785	0.126404	0.0413356
A_42_P517554	10.9374	10.6517	10.6178	11.8731	11.5343	11.4555	10.8939	10.9878	10.4629	0.00538347	0.0344038	10.7357	10.7815	11.621	0.175541	0.27987	0.221899
A_42_P519311	9.94386	10.2306	10.3273	9.50615	9.47057	9.63511	9.61164	9.69404	9.82547	0.00382106	0.0303606	10.1672	9.71039	9.53728	0.199392	0.107846	0.0865703
A_42_P520497	10.6802	10.1733	10.1426	9.62659	9.41468	9.08702	9.50724	9.26798	8.84916	0.00802629	0.0397778	10.332	9.20813	9.3761	0.301934	0.3331	0.271844
A_42_P522194	6.69071	6.70998	6.65783	5.80024	5.69679	5.81676	6.0627	6.4047	6.13642	0.00017605	0.00979073	6.68618	6.20128	5.77126	0.0263699	0.17999	0.0650222
A_42_P524098	8.0734	8.04837	7.8594	8.41084	8.54404	8.44819	8.23292	8.17601	8.06233	0.00219013	0.0246924	7.99372	8.15708	8.46769	0.117	0.0868571	0.0687092
A_42_P527724	8.60601	8.85408	8.52057	6.28546	7.0112	6.59138	6.85199	7.26558	7.35543	0.000285823	0.0115254	8.66022	7.15766	6.62935	0.173239	0.26851	0.364356
A_42_P528844	13.3158	13.1956	12.9438	13.5503	13.6807	13.5115	13.7997	13.8684	14.025	0.0017173	0.0219617	13.1517	13.8977	13.5808	0.189821	0.115432	0.088622
A_42_P531078	12.295	12.4729	12.2601	12.6809	12.6338	12.5757	12.5868	12.6761	12.6844	0.00533937	0.034274	12.3427	12.6491	12.6301	0.114144	0.0540994	0.0526985
A_42_P531684	4.1549	5.00345	4.59265	2.58692	1.71074	2.68334	2.76924	1.50047	1.79078	0.00240217	0.0256689	4.58367	2.02016	2.327	0.424347	0.664761	0.535869
A_42_P532444	4.33057	3.37896	4.25894	3.47635	3.91222	3.75403	1.77522	2.86926	2.32798	0.00903004	0.0416911	3.98949	2.32416	3.7142	0.529942	0.547032	0.220645
A_42_P533219	7.07433	7.08315	7.20658	7.69265	7.78493	7.70681	7.53619	7.51934	7.41478	7.35655e-05	0.00748667	7.12135	7.4901	7.72813	0.0739395	0.0657778	0.0496939
A_42_P540711	7.95725	8.4408	7.87329	6.03639	3.42443	5.10122	2.70159	1.81688	3.81607	0.00160129	0.0213886	8.09045	2.77818	4.85401	0.306308	1.00179	1.32341
A_42_P543877	6.13522	6.38908	6.17945	5.98764	5.80912	6.04626	5.44882	5.29142	5.56973	0.000935276	0.0176293	6.23458	5.43666	5.94767	0.135612	0.13955	0.123515
A_42_P547157	5.52497	4.71197	5.05609	8.2229	8.37313	7.34813	7.60928	7.95984	7.26168	0.000414387	0.0127076	5.09768	7.61027	7.98139	0.408094	0.34908	0.553534
A_42_P548800	12.925	12.8704	12.8456	12.7099	12.7769	12.691	12.5746	12.5244	12.4729	0.000232298	0.010557	12.8803	12.524	12.7259	0.0406421	0.0508493	0.0451339
A_42_P549786	1.32063	1.28726	1.2937	1.28557	1.27198	1.2698	2.03039	1.72497	1.77716	0.000520015	0.0136962	1.30053	1.84417	1.27578	0.0177018	0.163366	0.00854957
A_42_P550344	6.35925	6.4184	6.58987	5.84823	5.90871	5.91075	6.55331	6.1856	6.38202	0.0033471	0.0290814	6.45584	6.37365	5.88923	0.119785	0.184003	0.0355199
A_42_P555365	12.0186	12.0555	11.724	12.3692	12.5341	12.4349	12.2315	12.2139	12.2533	0.00473909	0.0325271	11.9327	12.2329	12.446	0.181675	0.0197499	0.0829829
A_42_P558206	7.12206	7.08549	7.17328	6.81591	7.02457	6.89231	6.90634	6.87356	6.88226	0.00844999	0.0405686	7.12694	6.88739	6.91093	0.0440961	0.0169801	0.105569
A_42_P560525	12.4914	12.3309	12.3362	12.669	12.6963	12.6399	12.557	12.5855	12.6425	0.00311642	0.0284171	12.3862	12.595	12.6684	0.0911473	0.0435344	0.0282364
A_42_P562435	10.5526	10.6307	10.5127	10.489	10.2587	10.4327	10.1629	10.0841	10.2017	0.00284082	0.0275429	10.5653	10.1496	10.3935	0.0600157	0.0598984	0.12006
A_42_P563156	4.2098	4.59992	4.3254	4.21154	4.19732	4.44368	5.05187	5.05211	5.0195	0.00114392	0.0190044	4.37837	5.04116	4.28418	0.200382	0.0187604	0.138317
A_42_P563648	5.93785	5.69423	5.74062	6.80577	6.83921	6.82821	6.782	6.34255	6.53318	0.000354545	0.0123636	5.7909	6.55257	6.8244	0.129359	0.220367	0.0170466
A_42_P564712	8.04579	8.27692	8.41792	7.94762	8.47571	7.95747	8.82356	9.18772	8.92373	0.00832352	0.0402996	8.24688	8.97834	8.12693	0.187876	0.188122	0.30209
A_42_P565275	7.38133	7.68752	7.52821	6.57569	6.04452	6.28773	5.92957	5.67006	6.14147	0.000279883	0.0115055	7.53235	5.9137	6.30265	0.153136	0.236108	0.265902
A_42_P565621	9.27595	10.7873	10.5382	8.0205	7.88274	8.05985	8.0646	9.0613	8.59551	0.00666266	0.0371777	10.2005	8.5738	7.9877	0.810287	0.498706	0.0930021
A_42_P576953	8.54612	9.14894	8.78952	9.54777	10.1036	10.237	9.94465	11.2332	10.9186	0.00831702	0.0402996	8.82819	10.6988	9.96278	0.303268	0.671813	0.365557
A_42_P580844	8.84054	9.5984	9.62031	5.64156	5.59661	6.76255	5.67697	5.48897	6.32733	0.000278482	0.0115055	9.35308	5.83109	6.00024	0.444011	0.439916	0.660564
A_42_P585695	7.41864	7.01789	8.07091	5.4289	4.80186	5.76466	5.20809	4.2878	5.31122	0.00208352	0.0240876	7.50248	4.9357	5.33181	0.531492	0.563464	0.488686
A_42_P586064	8.48698	8.45648	8.39795	7.75342	7.7315	7.67386	7.64032	8.02927	8.26534	0.00825366	0.0401902	8.44714	7.97831	7.71959	0.0452424	0.315608	0.0410921
A_42_P586256	9.4891	9.42072	9.32268	8.68444	8.6357	8.84314	8.83324	8.77978	8.68545	0.000138355	0.00909767	9.41083	8.76616	8.7211	0.083652	0.0748316	0.108469
A_42_P591344	9.06168	9.3068	9.07711	8.82445	9.15046	8.8621	9.67278	10.2903	10.1417	0.00235706	0.0254504	9.14853	10.0349	8.94567	0.137281	0.322296	0.178351
A_42_P591475	11.366	11.4583	11.2538	11.6761	11.7065	11.7802	11.836	12.2533	12.2139	0.00266444	0.0269143	11.3594	12.1011	11.7209	0.10237	0.230376	0.0535303
A_42_P592205	9.37299	9.62837	9.82547	8.73053	8.84615	9.00538	9.27696	9.35237	9.46013	0.00359977	0.0297847	9.60894	9.36316	8.86068	0.226862	0.0920597	0.138001
A_42_P593993	10.4299	10.1801	10.6699	11.3693	11.3793	10.9687	11.0146	11.1833	11.4652	0.00863437	0.0408179	10.4266	11.221	11.2391	0.24495	0.227634	0.2342
A_42_P594043	5.298	5.08423	5.26189	4.88464	5.11278	4.68817	4.52608	4.0904	4.30304	0.00288659	0.0275709	5.21471	4.3065	4.8952	0.114427	0.21786	0.212501
A_42_P598602	7.02665	7.27419	7.04847	2.72059	2.94919	2.28407	2.75752	4.06426	3.61135	3.51301e-05	0.00574208	7.11644	3.47771	2.65128	0.137053	0.663541	0.337931
A_42_P603980	13.9229	13.8514	13.8112	13.2534	13.3685	13.0496	13.3462	13.1909	13.5039	0.00247891	0.0261308	13.8618	13.347	13.2238	0.0565615	0.156482	0.161535
A_42_P604382	5.03148	4.72905	5.3409	5.48117	5.25565	5.24408	6.337	6.13792	5.84579	0.00390569	0.0305113	5.03381	6.1069	5.32697	0.30593	0.24707	0.133669
A_42_P604900	8.37717	8.26578	8.27456	7.59232	7.58406	7.52421	7.50463	7.86849	7.40137	0.00133686	0.0199867	8.30584	7.5915	7.56686	0.0619342	0.245374	0.0371697
A_42_P605711	9.61587	9.62416	9.31049	8.62263	8.86293	8.88952	8.80159	8.59057	8.24252	0.00325801	0.0287561	9.51684	8.54489	8.79169	0.178754	0.282323	0.147014
A_42_P608780	5.67083	6.58308	6.17511	10.0914	9.85715	10.7478	10.158	10.5465	10.6458	1.94981e-05	0.00435361	6.14301	10.4501	10.2321	0.456973	0.257784	0.46172
A_42_P609522	13.6807	13.2255	13.5946	14.0119	14.0283	14.0767	14.3112	14.315	14.1081	0.00288761	0.0275709	13.5002	14.2448	14.039	0.241832	0.118376	0.0336949
A_42_P611223	9.43396	9.41597	9.4319	10.2134	9.81914	9.97022	10.0882	9.89678	10.0485	0.00217406	0.0245789	9.42727	10.0112	10.0009	0.00984714	0.101041	0.198893
A_42_P616342	1.94528	1.78283	1.80033	1.74024	1.61255	1.68524	1.56393	1.54108	1.53376	0.00384905	0.0304691	1.84281	1.54626	1.67934	0.0891692	0.0157331	0.0640487
A_42_P617230	6.67903	6.73152	6.80321	7.35899	7.22136	7.03309	7.32633	7.11029	7.30996	0.00394862	0.0305339	6.73792	7.24886	7.20448	0.0623351	0.120288	0.163606
A_42_P620006	9.08702	9.14823	9.08349	8.55909	8.53837	8.82405	8.44778	8.54326	8.63362	0.00150795	0.0209363	9.10625	8.54155	8.6405	0.0364011	0.0929283	0.159291
A_42_P620448	5.53403	5.47504	5.62979	6.05716	6.08944	6.13695	6.07812	5.84187	5.946	0.000549116	0.013883	5.54629	5.95533	6.09452	0.0780978	0.118403	0.040133
A_42_P620762	12.7692	12.7192	12.7299	12.8753	12.9934	12.7938	13.4523	13.3896	13.2483	0.000258059	0.0109675	12.7394	13.3634	12.8875	0.0263427	0.104473	0.100358
A_42_P621642	10.4999	11.2257	11.1542	8.15992	8.21758	8.32185	8.77677	8.84054	8.47507	3.00403e-05	0.00517045	10.96	8.69746	8.23312	0.400011	0.195219	0.0820763
A_42_P621872	13.8444	14.1539	14.2034	13.4409	13.4932	13.4377	13.4932	13.3412	13.1278	0.00233458	0.025345	14.0672	13.3207	13.4573	0.194521	0.183543	0.0311413
A_42_P622574	9.85453	10.4763	10.435	9.39535	9.25083	9.40874	9.6167	9.89414	9.70247	0.00733395	0.0385916	10.2553	9.73777	9.35164	0.347664	0.14205	0.0875608
A_42_P626008	4.46334	4.46054	4.95063	1.82348	1.50776	1.55785	1.4665	1.46871	1.43712	1.44079e-06	0.00165802	4.62484	1.45744	1.6297	0.28215	0.0176347	0.169681
A_42_P626023	9.93675	10.2776	10.1935	9.42846	9.46856	9.53747	9.48419	9.44414	9.76701	0.00311904	0.0284171	10.136	9.56512	9.47816	0.177575	0.175992	0.055133
A_42_P626033	12.0915	11.881	11.9099	12.7469	12.5934	12.6412	12.6146	12.657	12.7961	0.000143519	0.00925447	11.9608	12.6892	12.6605	0.114118	0.0949322	0.0785591
A_42_P635146	14.5331	14.4642	14.473	14.33	14.3383	14.3184	14.2843	14.2554	14.0864	0.00561387	0.0346736	14.4901	14.2087	14.3289	0.0375276	0.106868	0.00995947
A_42_P636627	2.2999	2.52759	2.44725	2.0539	1.90098	1.95857	1.7865	1.78353	1.57961	0.000502707	0.0135271	2.42492	1.71655	1.97115	0.115477	0.118598	0.0772336
A_42_P640700	12.6001	12.457	12.582	12.8185	12.8694	12.6715	12.9397	12.8753	12.8498	0.00481113	0.0327305	12.5464	12.8883	12.7864	0.0779183	0.0463282	0.102743
A_42_P641517	5.60438	5.96106	5.6936	1.42749	1.36321	1.35449	1.33961	1.34659	1.8365	2.46546e-07	0.000409815	5.75301	1.50756	1.38173	0.185613	0.284886	0.0398685
A_42_P641962	10.6635	10.5808	10.5143	10.8407	10.8638	10.7791	10.3207	10.3577	10.365	8.88225e-05	0.00786263	10.5862	10.3478	10.8279	0.0747556	0.0237278	0.0438162
A_42_P643622	7.58466	7.94762	7.71801	6.67133	6.95991	6.99358	8.25337	8.28895	7.84396	0.000787641	0.0164569	7.7501	8.12876	6.87494	0.183595	0.247289	0.177133
A_42_P645186	1.87014	1.6856	1.7719	1.75814	1.80736	1.72669	2.3058	2.69738	2.58266	0.000530525	0.0137075	1.77588	2.52861	1.76406	0.0923365	0.201309	0.0406593
A_42_P646075	8.56599	8.48569	8.2304	8.91499	8.77043	8.79508	8.878	8.75972	8.8366	0.00829296	0.0402996	8.42736	8.82477	8.82683	0.175233	0.0600234	0.0773361
A_42_P648200	6.93227	6.85621	6.68022	7.24274	7.49295	7.3336	7.63418	7.23694	7.34983	0.00707812	0.0380392	6.8229	7.40698	7.35643	0.129284	0.204698	0.12666
A_42_P650571	1.33229	2.24949	1.33103	3.26466	2.92396	3.39976	2.84227	2.37394	2.41585	0.00599803	0.0356215	1.6376	2.54402	3.19613	0.52991	0.259143	0.245192
A_42_P651334	14.4885	14.4372	14.4018	15.0567	15.0534	15.0534	15.0144	15.0227	15.1208	2.91176e-06	0.00194862	14.4425	15.0526	15.0545	0.0436008	0.0592009	0.00191767
A_42_P652897	9.55774	9.93515	9.40029	11.0095	10.8248	10.6117	10.4084	10.9651	10.9339	0.0025321	0.0263423	9.63106	10.7691	10.8153	0.274866	0.312806	0.199066
A_42_P654695	1.67205	1.61026	1.60924	1.57071	1.52194	1.54114	1.4678	1.4644	1.50968	0.00219205	0.0246924	1.63051	1.48063	1.5446	0.0359698	0.0252214	0.0245691
A_42_P659321	6.16068	6.28321	6.08375	5.96188	5.85556	5.97803	5.73242	5.83899	5.48867	0.00884508	0.0413469	6.17588	5.68669	5.93182	0.100595	0.179581	0.0665342
A_42_P660334	8.80353	8.98402	9.09753	9.31947	9.28219	9.3236	9.17541	9.17541	9.15494	0.00784947	0.03945	8.9617	9.16859	9.30842	0.148265	0.0118189	0.0228082
A_42_P662897	4.51068	4.67128	4.50966	5.07323	4.74016	4.65445	5.76775	5.71903	5.76172	0.000108006	0.00826382	4.56387	5.7495	4.82261	0.0930167	0.0265561	0.221229
A_42_P664459	4.52445	4.71546	4.36951	5.11318	5.05703	5.30155	4.81124	4.5183	4.54875	0.00549474	0.0345209	4.53648	4.62609	5.15725	0.173286	0.161065	0.128077
A_42_P665084	2.46358	1.85569	1.89422	1.80421	1.67044	2.83516	4.9226	4.82761	4.94987	0.000242447	0.0107224	2.07116	4.90002	2.10327	0.340391	0.0641807	0.637355
A_42_P666663	5.67652	5.53174	5.33369	5.45344	5.53852	5.52269	6.12054	6.12076	6.18451	0.0004433	0.013029	5.51399	6.14194	5.50488	0.172106	0.0368691	0.0452453
A_42_P667564	1.37578	1.19958	1.19648	2.5359	2.40532	1.71094	2.42861	2.0607	2.24285	0.00832521	0.0402996	1.25728	2.24405	2.21739	0.102633	0.183956	0.44343
A_42_P671348	1.43463	1.69995	1.42935	2.43163	2.2738	2.30104	2.87749	2.84251	2.80711	1.32528e-05	0.00377598	1.52131	2.84237	2.33549	0.15473	0.0351945	0.0843667
A_42_P671601	5.15308	5.07702	5.2481	5.93866	6.14886	5.9934	5.71453	5.65895	5.83723	9.09996e-05	0.00795467	5.1594	5.7369	6.02697	0.0857156	0.0912216	0.109047
A_42_P671635	7.44745	7.43506	7.34983	7.72239	7.61812	7.71141	7.69482	7.95859	7.82473	0.00334614	0.0290814	7.41078	7.82605	7.68397	0.0531492	0.131891	0.0572956
A_42_P675879	14.9791	15.1725	14.872	14.6784	14.6927	14.7604	14.6467	14.4211	14.5062	0.00546664	0.0345209	15.0078	14.5247	14.7105	0.152329	0.113937	0.0437862
A_42_P676630	14.448	14.3354	14.3921	13.9469	13.6579	13.9792	13.9424	13.6633	13.8684	0.00371555	0.0302911	14.3919	13.8247	13.8613	0.0563225	0.144583	0.176957
A_42_P677354	2.27476	1.99193	2.09116	1.84325	1.76647	1.88107	1.61584	1.53957	1.52735	0.00103233	0.0184476	2.11928	1.56092	1.83026	0.143494	0.0479546	0.0583931
A_42_P678430	6.87501	7.20582	7.15783	6.55669	6.71246	6.60648	7.35262	7.82506	7.34119	0.00443735	0.0316092	7.07955	7.50629	6.62521	0.178757	0.276122	0.0795555
A_42_P679004	8.87058	8.72724	8.52029	9.42146	9.19568	9.1032	9.52297	9.9464	9.94802	0.00151765	0.0210028	8.70603	9.8058	9.24011	0.176106	0.244938	0.163719
A_42_P679251	6.37238	5.82642	6.36402	7.89196	7.47809	7.92927	7.64002	8.23381	7.75229	0.000694599	0.0153069	6.18761	7.87537	7.76644	0.312824	0.315446	0.250415
A_42_P679371	10.3623	10.8549	10.8582	8.15285	8.23632	8.17504	8.92414	9.82407	9.44707	0.000191269	0.0100399	10.6918	9.39843	8.18807	0.285382	0.451933	0.0432336
A_42_P680186	6.2926	6.35417	6.38055	6.1782	6.17434	6.36301	7.0344	6.90689	6.74362	0.000624489	0.0145937	6.34244	6.89497	6.23852	0.0451325	0.145757	0.107832
A_42_P682589	7.28735	9.2912	7.91364	11.8334	9.73448	10.1955	11.1004	12.6228	12.3939	0.00845399	0.0405748	8.16406	12.0391	10.5878	1.02513	0.820932	1.10306
A_42_P685050	7.94641	7.86801	7.89909	7.63753	7.1145	7.56996	8.03666	8.18344	8.11242	0.00789574	0.0395183	7.9045	8.11084	7.44067	0.0394771	0.0734017	0.28448
A_42_P685368	9.08029	8.92965	9.06555	9.13986	8.94578	9.22469	9.46816	9.58208	9.6478	0.00181397	0.0226141	9.02517	9.56601	9.10345	0.0830437	0.090891	0.142977
A_42_P685660	1.65825	1.61856	1.60755	1.51732	1.50544	1.50501	1.46479	1.45506	1.50219	0.000285588	0.0115254	1.62812	1.47401	1.50925	0.0266649	0.0248833	0.00698604
A_42_P694171	8.23454	8.45404	8.60521	9.1803	9.39053	9.16536	9.3693	9.13463	9.12399	0.000973102	0.0179002	8.43126	9.20931	9.24539	0.186381	0.138661	0.125909
A_42_P695401	7.08748	7.56445	7.19418	5.13177	5.53134	5.74031	6.75563	6.85006	6.71108	0.000200592	0.0102769	7.28203	6.77226	5.4678	0.250327	0.0709656	0.309204
A_42_P696578	7.98368	8.06903	8.10244	7.94326	7.93466	7.96384	7.89287	7.88241	7.80694	0.00620036	0.0361346	8.05172	7.86074	7.94725	0.0612439	0.0468891	0.0149956
A_42_P698240	12.9702	12.9833	12.7403	12.0847	11.7548	12.3762	11.6854	11.42	12.1778	0.00832269	0.0402996	12.8979	11.7611	12.0719	0.136703	0.384536	0.310931
A_42_P698409	12.8467	13.0394	13.0052	12.6338	12.669	12.7684	12.4934	12.5069	12.6856	0.00543902	0.0344946	12.9638	12.562	12.6904	0.102843	0.107272	0.0698251
A_42_P699937	13.1718	13.041	13.0829	13.4806	13.3412	13.3954	13.3081	13.2514	13.421	0.00591033	0.0353816	13.0985	13.3268	13.4057	0.0667773	0.086357	0.0702374
A_42_P700089	11.1527	11.4849	11.4752	10.8931	10.6773	10.9452	10.9554	10.9498	10.9222	0.00691516	0.0376707	11.371	10.9425	10.8385	0.189064	0.0177673	0.14204
A_42_P700209	3.90833	4.92517	3.82726	1.4317	1.43521	1.46558	1.39449	1.37726	1.37395	9.34783e-05	0.00795467	4.22026	1.3819	1.44417	0.611818	0.0110258	0.0186274
A_42_P700288	9.98293	9.82547	10.1121	9.61443	9.41042	9.2019	9.26559	9.20365	9.15664	0.00185673	0.0228051	9.97348	9.20863	9.40891	0.143525	0.0546438	0.20627
A_42_P703647	3.93046	3.1365	2.76746	1.48091	1.44279	1.44543	1.40145	1.39904	1.43435	0.000837172	0.0167903	3.27814	1.41161	1.45638	0.594298	0.0197258	0.0212868
A_42_P703664	6.01895	6.04405	6.08111	6.4865	6.43521	6.53382	6.65696	6.31815	6.65179	0.00393033	0.0305339	6.04804	6.5423	6.48518	0.0312698	0.194136	0.0493156
A_42_P704824	7.07301	7.39006	7.3695	7.71308	7.65324	7.67498	7.77223	7.67102	7.88004	0.0050578	0.0333058	7.27752	7.77443	7.68043	0.177411	0.104529	0.0302912
A_42_P708181	4.1401	4.81612	4.85351	1.92173	1.28431	3.17408	2.19293	1.31419	1.56579	0.00327095	0.0287844	4.60324	1.69097	2.12671	0.401527	0.452545	0.961419
A_42_P708593	8.342	8.53875	8.49673	8.98105	8.89449	8.3847	7.5026	7.643	7.86106	0.00245705	0.0260138	8.45916	7.66889	8.75341	0.103615	0.180629	0.322236
A_42_P710309	8.12748	8.25864	8.19305	8.74432	8.61844	8.58075	8.8817	8.68709	8.79201	0.000314768	0.0118912	8.19306	8.78693	8.64784	0.065578	0.0974062	0.0856551
A_42_P711464	3.79913	3.51659	3.73896	4.88168	5.43971	4.56561	4.78889	5.2567	4.80233	0.0034935	0.0295482	3.68489	4.94931	4.96233	0.148828	0.266296	0.442598
A_42_P714281	12.0059	11.7606	11.6576	12.4224	12.3954	12.4324	12.3404	12.2611	12.1956	0.00136891	0.0200773	11.808	12.2657	12.4167	0.178932	0.0725254	0.0191153
A_42_P714311	9.15131	10.1442	9.82698	7.06332	7.26925	7.13043	8.58535	9.85715	9.53623	0.00134265	0.0199867	9.70749	9.32624	7.15433	0.50711	0.661393	0.105026
A_42_P717631	10.6825	10.6579	10.4984	10.2246	10.3125	10.1733	10.3836	10.5808	10.6005	0.00831404	0.0402996	10.6129	10.5216	10.2368	0.09992	0.119957	0.0704257
A_42_P719350	5.86476	5.86582	5.928	6.57663	6.53885	6.8686	6.46017	6.73821	7.09788	0.0044339	0.0316092	5.88619	6.76542	6.66136	0.0362099	0.319728	0.180468
A_42_P722644	4.12114	4.09414	4.13315	4.21577	4.21628	3.95904	3.21927	3.63294	3.64524	0.00512843	0.033576	4.11614	3.49915	4.13036	0.0199814	0.242459	0.14837
A_42_P722761	11.9241	11.8264	11.9293	11.5481	11.5274	11.5712	11.5244	11.5063	11.383	0.000222604	0.0104448	11.8933	11.4712	11.5489	0.0579918	0.0769595	0.0219083
A_42_P723437	9.67225	9.56671	9.57184	10.6469	10.4155	10.542	10.3215	10.6117	10.6094	0.000126421	0.00893702	9.6036	10.5142	10.5348	0.0595052	0.16691	0.115874
A_42_P723851	4.73944	4.7189	4.866	5.18492	5.13086	5.21247	5.1021	5.05632	5.39472	0.00831427	0.0402996	4.77478	5.18438	5.17608	0.079665	0.183596	0.0415147
A_42_P725303	8.05819	7.95324	7.92081	8.10933	8.11211	8.27142	8.2273	8.3635	8.30488	0.00697584	0.0377974	7.97741	8.29856	8.16429	0.0718098	0.0683207	0.0927883
A_42_P726091	9.43139	8.30451	9.12437	7.06866	7.22994	7.58058	7.61611	7.45883	6.9744	0.00434336	0.0314203	8.95342	7.34978	7.29306	0.582569	0.334466	0.261732
A_42_P726223	8.24983	8.3601	8.40786	7.55933	7.65464	7.88479	7.50524	7.30237	7.3738	0.000224039	0.0104448	8.33926	7.3938	7.69959	0.0810504	0.102904	0.167317
A_42_P726413	9.17676	9.26522	9.18668	9.00621	9.15743	9.05534	8.95704	8.97571	8.98872	0.00483453	0.0327854	9.20956	8.97382	9.07299	0.048464	0.0159278	0.0771375
A_42_P728204	6.69189	6.70747	6.65277	5.77223	5.74196	5.6965	5.72666	6.36335	6.01435	0.00212987	0.0243414	6.68404	6.03479	5.7369	0.0281825	0.31884	0.0381141
A_42_P728278	8.86118	8.78996	9.01872	8.89733	8.85086	8.92373	8.61611	8.59803	8.5252	0.00356168	0.029701	8.88995	8.57978	8.89064	0.117058	0.0481228	0.0368908
A_42_P728472	13.1341	13.0159	13.0137	13.4863	13.3835	13.4154	13.2032	13.4273	13.4904	0.00782845	0.039445	13.0546	13.3736	13.4284	0.0689035	0.150922	0.0526366
A_42_P728925	12.2306	12.135	12.3042	11.5599	11.5049	11.3139	11.435	11.5161	11.416	8.26216e-05	0.00758294	12.2233	11.4557	11.4596	0.0848286	0.0531361	0.129134
A_42_P729340	14.148	15.0891	15.0041	11.9675	12.3929	12.8572	12.6595	12.9721	12.2266	0.00126241	0.0196215	14.7471	12.6194	12.4059	0.520568	0.374358	0.444964
A_42_P732771	2.16381	1.91033	1.94597	1.82838	1.69804	1.86793	1.63803	1.57757	1.54413	0.00580152	0.0351238	2.0067	1.58658	1.79812	0.137223	0.0475905	0.0888974
A_42_P733814	7.89493	7.67351	7.78583	7.82907	7.67498	7.62944	8.48795	8.28551	8.50135	0.000432505	0.0128634	7.78476	8.42494	7.71116	0.11071	0.120934	0.104617
A_42_P734842	8.42489	8.53984	8.57689	7.89652	8.07975	8.00779	8.11475	8.12979	8.09796	0.000256896	0.0109675	8.51388	8.11417	7.99469	0.0792544	0.0159231	0.0923154
A_42_P736315	13.1773	13.9023	13.7739	11.1071	11.3873	11.7498	11.7359	11.719	11.6991	0.000175805	0.00979073	13.6178	11.718	11.4147	0.386914	0.0184009	0.322191
A_42_P737278	10.5237	10.3278	9.98503	9.73608	9.7309	9.74614	9.32744	9.26078	9.40921	0.00118074	0.0191789	10.2789	9.33248	9.73771	0.272667	0.074343	0.00774542
A_42_P737455	8.54519	8.70965	8.53002	7.94039	7.91944	8.06374	8.11654	8.13833	8.25686	0.000302261	0.01177	8.59495	8.17057	7.97452	0.0996227	0.0755124	0.0779717
A_42_P737844	5.16841	4.61385	4.49565	5.16022	5.41006	5.27037	6.18687	5.78506	5.87471	0.00341759	0.0293151	4.7593	5.94888	5.28022	0.359188	0.210924	0.125214
A_42_P746109	12.1616	12.3632	12.3058	11.8848	12.0102	11.9627	12.122	12.2547	12.1132	0.00875101	0.0410874	12.2769	12.1633	11.9526	0.103883	0.0792837	0.0633161
A_42_P747877	6.60959	6.8129	6.94338	7.46758	7.23476	7.24683	7.03309	6.8879	6.90568	0.00682449	0.0376117	6.78862	6.94222	7.31639	0.168214	0.0791913	0.131072
A_42_P749550	8.31615	9.05409	9.08029	7.06533	7.22113	7.41102	7.63337	8.5894	8.5042	0.00863236	0.0408179	8.81685	8.24232	7.23249	0.433809	0.529084	0.173125
A_42_P750340	4.04735	4.01193	3.66316	4.11725	4.10926	4.25028	4.81102	4.72691	4.4194	0.00572264	0.0349004	3.90748	4.65244	4.15893	0.212327	0.206159	0.0792102
A_42_P751001	10.3891	10.4263	10.5357	9.96618	10.0395	10.2234	10.1296	10.2056	10.2259	0.00683865	0.0376117	10.4504	10.187	10.0764	0.076215	0.0507668	0.13251
A_42_P752901	16.3883	16.2398	16.2398	16.5195	16.6441	16.6441	16.5543	16.5759	16.4079	0.00940063	0.0424106	16.2893	16.5127	16.6026	0.0857665	0.091406	0.0719355
A_42_P754122	7.46187	7.47199	7.46295	6.6222	6.45275	6.91007	6.75404	6.89154	7.03094	0.00189827	0.023158	7.4656	6.89217	6.66168	0.00555558	0.138448	0.231204
A_42_P754715	8.85169	10.7194	10.137	7.33638	7.157	7.42462	6.78047	6.93016	7.25458	0.00149724	0.0209139	9.90271	6.9884	7.306	0.955656	0.24236	0.13637
A_42_P757258	4.6558	4.9696	5.01325	3.19176	3.17785	3.51076	3.18885	3.25515	3.35647	2.84969e-05	0.00517045	4.87955	3.26682	3.29346	0.194998	0.0844193	0.18832
A_42_P762618	13.2228	13.0775	13.0568	12.816	12.7708	12.9109	12.7961	12.7442	12.7989	0.00193753	0.0233426	13.119	12.7797	12.8326	0.0904433	0.0307716	0.0715172
A_42_P768024	8.01916	9.12317	8.70965	5.61884	5.73625	6.31698	6.88686	7.48811	6.91725	0.000771656	0.0162134	8.61733	7.09741	5.89069	0.557764	0.3387	0.373818
A_42_P771337	2.25714	1.93967	2.0222	1.88166	1.77058	1.9867	3.14651	3.17821	2.93404	7.88162e-05	0.00758294	2.07301	3.08626	1.87965	0.16472	0.132773	0.108077
A_42_P772136	5.08643	5.63717	5.3877	4.62824	4.63701	4.50371	4.51251	4.08656	3.90738	0.00261585	0.0266756	5.37043	4.16882	4.58965	0.275776	0.310835	0.0745597
A_42_P772157	11.0276	11.2776	11.1204	11.0015	10.8106	10.7363	10.1328	10.5087	10.458	0.0028791	0.0275709	11.1419	10.3665	10.8495	0.126364	0.203973	0.136797
A_42_P772878	11.6618	11.7005	11.6145	11.3499	11.3667	11.4843	11.2871	11.1004	10.8717	0.00491322	0.0329794	11.6589	11.0864	11.4003	0.043083	0.208081	0.0732105
A_42_P773636	8.75314	9.05217	8.73651	8.38283	8.25373	8.23986	8.92194	9.09898	8.86417	0.00175157	0.0221431	8.84727	8.9617	8.29214	0.17764	0.122348	0.0788453
A_42_P774912	14.7806	14.7566	14.7446	15.2711	15.1555	15.1867	15.1332	15.3262	15.4022	0.000676109	0.0150368	14.7606	15.2872	15.2045	0.0183472	0.13868	0.059815
A_42_P775256	7.35414	7.23369	7.37998	7.4418	7.48412	7.25922	8.10244	7.96009	7.75585	0.00217058	0.0245627	7.3226	7.93946	7.39505	0.0780728	0.174212	0.119518
A_42_P776359	10.5921	10.6189	10.8917	10.3107	10.0368	10.1442	10.2881	10.4026	10.4763	0.00834881	0.0403374	10.7009	10.389	10.1639	0.165783	0.0948268	0.138002
A_42_P778115	4.53815	4.67459	4.93677	5.69851	5.34017	5.68497	5.36564	5.40134	5.77416	0.00429397	0.0314061	4.7165	5.51371	5.57455	0.202591	0.226255	0.20309
A_42_P778313	2.44844	3.47	2.657	1.20678	1.20346	1.19	2.04372	2.25188	1.47776	0.00572848	0.0349042	2.85848	1.92445	1.20008	0.539758	0.400607	0.00888323
A_42_P778560	4.35205	4.58857	4.62928	5.1006	4.95258	5.21055	6.29001	6.07691	6.11081	1.49182e-05	0.00391538	4.5233	6.15924	5.08791	0.149698	0.11451	0.129451
A_42_P780943	8.38667	8.25186	8.3596	8.40456	8.22602	8.46169	7.9612	8.00307	8.11444	0.00825306	0.0401902	8.33271	8.02624	8.36409	0.0713153	0.079205	0.12294
A_42_P785801	12.5677	12.6312	11.9714	13.4507	13.4654	13.3069	13.3301	13.2166	13.5685	0.00317798	0.0285832	12.3901	13.3717	13.4077	0.363962	0.179601	0.0875565
A_42_P785926	10.3956	10.3359	10.5093	10.5808	10.6081	10.5662	10.3451	10.3941	10.3617	0.00607356	0.0358224	10.4136	10.367	10.585	0.0880686	0.0249434	0.0212412
A_42_P786317	5.70007	5.69398	5.80892	5.83561	5.58039	5.71636	5.39967	5.21532	5.44923	0.00902484	0.0416911	5.73432	5.35474	5.71079	0.0646735	0.123255	0.1277
A_42_P792971	2.20381	1.93461	1.98562	1.84335	1.72032	1.91768	2.98769	2.44619	2.9131	0.00240026	0.0256668	2.04135	2.78233	1.82711	0.142993	0.29348	0.0996761
A_42_P794149	10.4069	10.6688	10.4257	10.0748	9.91157	9.92455	9.42962	9.69198	9.73262	0.000665656	0.0149066	10.5004	9.61807	9.97031	0.146076	0.164461	0.0907362
A_42_P794172	8.76417	8.72117	8.93198	7.97024	7.99632	8.22602	8.22507	8.19131	7.8594	0.00177651	0.022352	8.80578	8.09193	8.06419	0.111392	0.202081	0.14075
A_42_P794901	10.0062	10.3365	10.462	9.56717	9.52589	9.69488	9.67661	9.56277	9.88191	0.00649456	0.0367886	10.2682	9.7071	9.59598	0.23545	0.161738	0.0881045
A_42_P795269	6.8815	6.31698	6.41631	7.1332	7.30091	7.05876	7.93327	7.59602	7.61745	0.0017254	0.0219676	6.53827	7.71558	7.16429	0.301371	0.188831	0.124033
A_42_P799947	9.02491	9.10364	9.17541	8.89561	9.00206	8.89994	8.86977	8.83324	8.86118	0.00478494	0.0326415	9.10132	8.85473	8.93253	0.0752789	0.0190987	0.0602469
A_42_P801679	7.20975	7.51216	7.44882	4.53692	4.55058	4.33169	4.85765	5.70536	5.52643	4.1317e-05	0.00576278	7.39025	5.36315	4.47306	0.159486	0.446822	0.122621
A_42_P805179	10.7839	10.7431	10.6334	11.0344	10.9102	11.043	10.953	10.9547	11.0262	0.00389214	0.0305113	10.7201	10.978	10.9959	0.0778501	0.0417861	0.0743282
A_42_P806593	7.17209	7.59476	7.58842	6.74234	6.75202	6.9959	6.7976	6.74006	6.6314	0.00386193	0.0304934	7.45176	6.72302	6.83009	0.242218	0.0843969	0.143683
A_42_P808887	6.00439	6.37019	5.93342	5.50591	5.30672	5.61655	4.41588	4.42372	3.42443	0.00147666	0.0207674	6.10267	4.08801	5.4764	0.234382	0.574692	0.157012
A_42_P808973	12.2776	12.6729	12.457	12.2515	12.2981	12.2926	11.8313	11.5848	11.9534	0.00483362	0.0327854	12.4692	11.7898	12.2807	0.197949	0.187768	0.0254578
A_42_P809953	9.15842	9.78149	9.53683	8.37855	8.44432	8.65111	8.87832	9.0702	9.05596	0.00322049	0.0286823	9.49225	9.00149	8.49133	0.313917	0.106906	0.142229
A_42_P810313	5.66015	5.74224	5.92161	5.9692	6.04562	6.14572	5.60591	5.71852	5.70845	0.00871412	0.0410009	5.77467	5.67763	6.05351	0.133709	0.06231	0.0885242
A_42_P810736	8.32612	8.23381	8.14689	7.58466	7.63109	7.57286	7.38847	7.25724	7.24221	1.047e-05	0.00340502	8.23561	7.29597	7.5962	0.0896293	0.0804533	0.0307822
A_42_P812182	1.6341	1.59142	1.58104	1.50495	1.48915	1.49976	1.44207	1.44212	1.48091	0.000392924	0.0125043	1.60218	1.45503	1.49795	0.0281192	0.0224104	0.00805328
A_42_P815727	10.255	10.47	10.4821	10.0932	10.0959	10.0967	10.266	10.1702	10.156	0.00971774	0.0429602	10.4024	10.1974	10.0953	0.127759	0.059844	0.00181418
A_42_P818546	9.31584	9.12623	9.17454	9.04625	9.02845	8.88398	8.86375	8.93271	8.80159	0.00774644	0.039337	9.20554	8.86602	8.98622	0.0985357	0.0655899	0.088995
A_42_P822638	10.4489	10.5143	10.1356	11.3899	11.1892	10.9715	11.0648	11.0497	11.1179	0.00203891	0.0238858	10.3663	11.0775	11.1835	0.202399	0.0358014	0.209264
A_42_P822726	9.39308	10.1994	9.91499	7.26964	7.44379	7.71736	8.19092	9.33239	8.92752	0.00157663	0.0212585	9.83584	8.81694	7.47693	0.408971	0.578713	0.225694
A_42_P823351	2.22651	2.30011	2.06315	2.12759	1.7571	2.07869	3.72806	4.5527	5.26338	0.000958951	0.0177989	2.19659	4.51471	1.98779	0.121278	0.768365	0.201279
A_42_P825947	9.88789	10.0738	10.1473	9.26135	9.11365	9.41894	9.43316	9.94143	9.70826	0.00697101	0.0377974	10.0363	9.69428	9.26465	0.133677	0.254423	0.152671
A_42_P826853	6.05817	4.93704	4.62695	2.60612	1.88005	1.41624	4.26558	3.13214	2.26194	0.00738	0.0386607	5.20739	3.21989	1.96747	0.752933	1.0047	0.599738
A_42_P832637	10.516	10.6555	10.5623	10.2164	9.90937	10.0119	9.83165	9.62263	9.9155	0.000919842	0.0175297	10.5779	9.78993	10.0459	0.071048	0.15083	0.156297
A_42_P833045	1.80421	1.67149	1.75722	1.87223	1.83791	1.74937	2.4516	2.13563	2.37901	0.00127048	0.0196215	1.7443	2.32208	1.81984	0.0672968	0.165504	0.0633959
A_42_P833096	1.81487	2.3245	2.53619	4.17852	4.43679	4.33858	4.75251	5.91919	5.54565	0.000227158	0.0104448	2.22519	5.40578	4.31796	0.370771	0.595784	0.130359
A_42_P835787	8.6862	8.70302	9.06006	8.43439	8.27932	8.21825	8.07204	8.11242	8.07393	0.00175042	0.0221431	8.81643	8.08613	8.31065	0.211158	0.0227853	0.111426
A_42_P836777	4.31776	4.42372	3.97246	3.59715	3.20811	3.78039	2.50092	3.12527	2.22016	0.00351075	0.0295559	4.23798	2.61545	3.52855	0.23597	0.463297	0.29224
A_42_P837214	11.5735	12.0436	11.7963	14.0327	14.1954	13.9203	14.1052	14.247	13.9584	5.94399e-06	0.00281903	11.8045	14.1035	14.0495	0.235161	0.144321	0.138358
A_42_P840729	9.78358	10.3964	10.0954	8.07924	8.42199	8.51849	8.20373	9.00381	8.8369	0.00139353	0.0202597	10.0918	8.68148	8.33991	0.306427	0.422078	0.230841
A_42_P840836	5.89083	6.10235	5.86526	6.25133	5.83219	6.25213	5.50343	5.40245	5.47033	0.00618742	0.0361154	5.95281	5.45873	6.11188	0.13013	0.0514788	0.242223
A_42_P841516	11.898	12.0088	11.8408	11.6978	11.7216	11.7095	11.7498	11.6693	11.593	0.00884208	0.0413469	11.9159	11.6707	11.7096	0.0854004	0.0783797	0.0118896
A_43_P10052	10.3137	10.0386	10.2524	10.6853	10.6171	10.6572	10.7048	10.4654	10.594	0.00483431	0.0327854	10.2015	10.5881	10.6532	0.144429	0.119822	0.0343113
A_43_P10062	13.0467	13.1331	12.8908	12.7547	12.6715	12.7416	12.6785	12.5102	12.4976	0.00287741	0.0275709	13.0235	12.5621	12.7226	0.122814	0.101036	0.0447545
A_43_P10082	3.14404	2.33327	2.29379	2.45044	2.57971	2.94949	1.3988	1.38163	1.29305	0.00389684	0.0305113	2.59037	1.35783	2.65988	0.4799	0.0567495	0.259005
A_43_P10085	11.5274	11.5274	11.5772	11.6038	11.593	11.3118	12.2971	11.9549	11.8932	0.0098634	0.0431842	11.544	12.0484	11.5029	0.0287572	0.217563	0.165569
A_43_P10207	11.5041	11.6704	11.421	10.8946	10.651	10.6717	10.9814	11.1942	11.2659	0.00121222	0.0193955	11.5318	11.1472	10.7391	0.126987	0.147999	0.135056
A_43_P10257	15.6109	15.4708	15.6968	15.2326	15.1725	15.2636	15.1208	15.1244	14.9598	0.000976984	0.0179038	15.5928	15.0684	15.2229	0.1141	0.0940049	0.0463265
A_43_P10367	7.96277	7.77754	7.86748	8.1842	8.39322	8.28854	8.43783	8.7579	8.56051	0.00115851	0.0190044	7.86926	8.58541	8.28865	0.0926313	0.161486	0.104513
A_43_P10424	11.786	11.6773	11.759	12.1553	12.2207	11.9996	12.1515	12.3715	12.3513	0.00149472	0.0208981	11.7408	12.2914	12.1252	0.0565737	0.121611	0.113607
A_43_P10468	12.0749	11.8682	12.0321	11.3004	11.3684	11.3263	11.5812	11.8629	11.6274	0.000964333	0.0178497	11.9917	11.6905	11.3317	0.109097	0.151086	0.0343558
A_43_P10509	6.52825	6.15572	6.26969	5.91901	5.66122	6.03339	5.75161	5.59684	5.72593	0.00840541	0.040498	6.31788	5.69146	5.87121	0.190881	0.0829444	0.190633
A_43_P10593	12.3128	12.7769	12.6028	10.7609	11.1999	11.168	11.3018	11.5781	11.4746	0.000305961	0.0117969	12.5642	11.4515	11.0429	0.234446	0.139593	0.244758
A_43_P10596	5.70072	5.39738	5.50663	5.51066	5.12718	5.39839	4.74617	4.49907	4.60612	0.000985167	0.0179104	5.53491	4.61712	5.34541	0.153631	0.123919	0.197152
A_43_P10628	3.08219	2.90306	3.13527	4.91228	4.14625	3.99184	4.25063	4.11083	3.85975	0.00508384	0.0333674	3.04017	4.07374	4.35012	0.121668	0.198062	0.492928
A_43_P10631	12.1638	11.5719	11.5063	12.926	12.7149	12.7923	12.6836	12.5647	12.6751	0.00222024	0.0248614	11.7473	12.6411	12.8111	0.362174	0.0663163	0.106798
A_43_P10692	8.10439	8.18535	8.20465	7.39038	7.37119	7.62589	7.59907	8.01705	7.94584	0.00442063	0.031597	8.1648	7.85399	7.46249	0.0531975	0.223617	0.141838
A_43_P10705	1.45744	1.57071	1.42654	4.55564	3.93081	4.25681	4.32022	2.96667	3.30052	0.00069995	0.0153442	1.4849	3.52914	4.24775	0.0759084	0.705142	0.312514
A_43_P10723	3.83755	5.42848	4.53391	1.27867	1.27329	1.28667	1.80828	1.79972	1.28426	0.000311794	0.0118912	4.59998	1.63075	1.27954	0.79752	0.300104	0.00673229
A_43_P10746	12.4175	12.0197	12.3773	13.0983	13.4273	13.2331	13.6706	13.5319	13.02	0.0030334	0.0280122	12.2715	13.4075	13.2529	0.218975	0.342689	0.165404
A_43_P10785	14.4333	14.2701	14.1052	14.657	14.8633	14.6374	14.7174	14.5817	14.6657	0.0093041	0.0421735	14.2695	14.6549	14.7193	0.164038	0.0684741	0.125168
A_43_P10814	6.53797	6.89976	6.54819	10.7267	10.506	8.32986	9.32843	10.9196	10.6117	0.00544227	0.0344946	6.66197	10.2866	9.8542	0.205996	0.84394	1.32471
A_43_P10818	8.72994	8.57452	8.61803	8.42565	8.38512	8.45008	8.20421	8.19735	8.34848	0.00147311	0.0207674	8.64083	8.25001	8.42028	0.0801809	0.085342	0.032812
A_43_P10919	5.71121	5.4579	5.71958	5.48836	5.39441	5.67847	4.94035	4.90928	5.06147	0.00159347	0.0213493	5.62957	4.97036	5.52041	0.148724	0.0804121	0.144717
A_43_P10939	7.83162	8.8203	8.80477	5.15945	5.22226	5.55801	5.69679	5.52616	5.43658	6.12902e-05	0.00689487	8.48556	5.55317	5.31324	0.566385	0.132193	0.214293
A_43_P10941	2.23014	1.95258	2.00884	1.85523	1.73462	1.94309	1.66198	1.5834	1.54344	0.00586464	0.0352255	2.06385	1.59628	1.84431	0.146728	0.0603107	0.104659
A_43_P11032	1.44684	1.41517	1.39608	2.01745	2.32844	2.19997	1.79129	1.74774	1.85851	0.000223822	0.0104448	1.41936	1.79918	2.18195	0.0256391	0.0558031	0.156277
A_43_P11066	9.51436	9.47964	9.35993	9.81816	9.8853	9.81395	9.94193	9.79801	9.93675	0.000485866	0.0135271	9.45131	9.89223	9.83914	0.0810159	0.0816359	0.0400359
A_43_P11099	12.2293	12.1749	12.1478	11.9443	11.9212	11.9266	11.8652	11.6773	11.8661	0.00126461	0.0196215	12.184	11.8029	11.9307	0.0415164	0.108715	0.0120863
A_43_P11134	13.227	13.4236	13.317	12.9738	12.9058	12.8247	13.151	13.2067	13.3354	0.00281563	0.0274637	13.3225	13.2311	12.9014	0.0984304	0.0945656	0.0746179
A_43_P11220	8.91354	9.04727	9.20932	8.31208	8.25525	8.35372	8.54658	8.99457	8.79743	0.00323266	0.028704	9.05671	8.77953	8.30702	0.148118	0.224534	0.0494324
A_43_P11226	9.01086	8.90113	8.66816	9.30506	9.30716	9.3616	9.57874	9.64831	9.78295	0.000490598	0.0135271	8.86005	9.67	9.32461	0.175004	0.103817	0.0320512
A_43_P11301	11.6786	11.7102	11.719	11.7171	11.6423	11.584	11.915	11.9511	11.8009	0.00657224	0.0369488	11.7026	11.889	11.6478	0.0212303	0.0784336	0.0667226
A_43_P11322	1.51354	1.47477	1.50178	1.47602	1.45464	1.46136	1.81568	1.59349	1.75093	0.00674953	0.0373752	1.4967	1.72003	1.464	0.0198768	0.114274	0.0109346
A_43_P11343	10.3236	10.0585	10.605	9.43444	9.30257	9.03372	8.61518	8.81684	8.64764	0.000197541	0.0101904	10.329	8.69322	9.25691	0.273274	0.108282	0.204221
A_43_P11350	8.2576	7.84264	8.02927	7.94705	7.50228	8.02415	7.25216	6.97283	7.20709	0.00585477	0.035208	8.04317	7.14402	7.82449	0.207827	0.149959	0.281696
A_43_P11359	11.5772	12.3503	12.1185	10.2194	10.0909	10.5511	10.4118	10.7973	10.8764	0.00103601	0.0184569	12.0153	10.6952	10.2872	0.396731	0.248591	0.237473
A_43_P11366	1.22644	1.20871	1.21937	1.20891	1.21323	1.20186	1.82413	1.53221	1.48327	0.00539983	0.0344038	1.21817	1.6132	1.208	0.0089238	0.184298	0.00574006
A_43_P11434	15.2128	15.2937	15.351	15.2791	15.3152	15.0683	14.976	14.8329	14.9571	0.00828355	0.0402867	15.2858	14.922	15.2209	0.0694414	0.0777522	0.13337
A_43_P11443	15.2448	15.5213	15.4584	15.5449	15.5503	15.6377	15.795	15.7854	15.8755	0.00492412	0.0329911	15.4081	15.8186	15.5776	0.144941	0.0494696	0.0520895
A_43_P11451	8.1618	7.50922	7.99322	7.88332	7.83162	7.84927	8.97745	8.96616	8.77793	0.00120883	0.0193828	7.88808	8.90718	7.85474	0.338756	0.112076	0.0262818
A_43_P11530	2.27505	1.98821	2.07681	1.86477	1.762	1.94389	1.64489	1.56156	1.53711	0.00244451	0.0259781	2.11336	1.58119	1.85689	0.146871	0.0565073	0.0912006
A_43_P11558	3.16714	2.91715	2.91569	3.71247	4.3151	4.00592	4.31271	4.21183	4.44209	0.000516719	0.0136834	2.99999	4.32221	4.01117	0.144758	0.115423	0.301349
A_43_P11579	1.23904	1.43319	1.24428	2.5791	1.22737	2.09877	3.81529	3.62703	3.0388	0.00311337	0.0284171	1.3055	3.49371	1.96841	0.110611	0.405048	0.685228
A_43_P11580	14.4249	14.2321	14.3548	13.8095	13.7091	13.4892	13.4069	13.3186	13.4543	0.000166093	0.00956133	14.3372	13.3933	13.6692	0.0975714	0.068908	0.163827
A_43_P11636	14.784	14.4961	14.5572	15.0743	14.9529	14.9571	14.8305	14.9008	14.8419	0.00871788	0.0410009	14.6124	14.8577	14.9948	0.151665	0.0377283	0.0689149
A_43_P11763	7.12589	7.18899	7.15491	6.80473	6.70935	6.96507	6.60438	6.22901	6.38124	0.00137897	0.0201644	7.1566	6.40488	6.82638	0.0315843	0.188797	0.129229
A_43_P11800	7.98658	7.97346	8.13035	9.42458	9.26615	9.05765	9.12317	9.31518	9.30104	4.08385e-05	0.00576278	8.03013	9.24646	9.24946	0.0870371	0.107012	0.184034
A_43_P11845	9.83331	10.1103	10.2724	8.59641	8.50457	9.10656	8.44124	8.27358	8.41435	0.000256972	0.0109675	10.072	8.37639	8.73585	0.222036	0.0900463	0.324317
A_43_P11857	3.91147	3.92799	3.64095	4.22921	4.81246	4.3611	5.76844	5.55715	5.78642	0.000106184	0.00825445	3.8268	5.704	4.46759	0.161166	0.1275	0.30586
A_43_P11882	1.52616	1.54927	1.69556	1.43755	1.5996	1.43631	1.86197	1.75404	1.79384	0.00921204	0.0419751	1.59033	1.80328	1.49115	0.0918622	0.0545829	0.0939184
A_43_P11883	5.39625	5.15529	4.98252	5.36457	5.73167	5.47079	6.28912	6.09744	5.90635	0.00346672	0.02947	5.17802	6.09764	5.52234	0.207797	0.191386	0.188904
A_43_P11978	11.2601	11.2745	11.3094	10.9661	11.1331	10.9707	10.9643	10.9239	10.771	0.00290844	0.0276259	11.2813	10.8864	11.0233	0.0253431	0.101937	0.0951472
A_43_P11984	7.77242	7.82802	7.89932	7.89546	7.85141	7.91914	8.02762	8.18535	8.23406	0.00450712	0.0317573	7.83325	8.14901	7.88867	0.0636123	0.107912	0.0343721
A_43_P11991	7.2717	7.5116	7.09788	8.6896	8.0211	8.14867	8.42138	8.86894	8.51753	0.00264629	0.0268446	7.29373	8.60261	8.28646	0.207735	0.235602	0.354908
A_43_P11998	1.30904	1.28557	1.30533	1.27257	1.27384	1.27351	1.72595	1.7186	1.79149	5.76135e-07	0.000783543	1.29998	1.74535	1.27331	0.012613	0.0401304	0.000656476
A_43_P12003	1.67182	1.5996	1.60688	1.58555	1.52354	1.54463	1.4676	1.46525	1.51046	0.00488388	0.0328794	1.6261	1.4811	1.55124	0.0397633	0.0254526	0.0315283
A_43_P12070	8.88355	10.3101	10.1595	6.42411	7.17827	7.36299	8.98715	10.0252	9.66816	0.00251593	0.0263021	9.78439	9.56015	6.98845	0.783776	0.527359	0.497387
A_43_P12083	5.00117	5.00864	4.96927	5.35437	5.28933	5.14866	5.93949	5.87303	5.66309	0.000179525	0.00987388	4.99303	5.8252	5.26412	0.0209156	0.144274	0.105147
A_43_P12090	8.65178	8.65327	8.77467	7.76439	7.52453	7.94326	7.9224	7.8412	7.28148	0.00341429	0.0293151	8.69324	7.68169	7.74406	0.070521	0.348968	0.210107
A_43_P12148	5.03909	5.8663	5.42192	3.44301	3.33248	3.09806	3.88189	2.95458	3.09352	0.000723743	0.0156011	5.44244	3.31	3.29118	0.41399	0.500119	0.176145
A_43_P12170	1.61795	1.57115	1.57	1.52415	1.49159	1.51554	1.43543	1.43543	1.48468	0.00168107	0.0219296	1.58637	1.45185	1.51043	0.0273582	0.0284356	0.0168719
A_43_P12207	13.8473	13.2621	13.0176	14.6428	14.3822	14.4427	14.239	13.9947	14.4452	0.00778656	0.0394203	13.3757	14.2263	14.4892	0.426353	0.225528	0.136389
A_43_P12215	10.6384	10.5388	10.6861	10.1459	10.1634	10.179	10.1773	10.156	10.2417	5.69642e-05	0.00671012	10.6211	10.1916	10.1628	0.0751575	0.0445927	0.0165299
A_43_P12244	12.8456	12.7781	12.8891	13.1167	13.0671	13.1611	13.2086	13.1119	13.141	0.000519253	0.0136962	12.8376	13.1538	13.115	0.0559166	0.0496365	0.0469957
A_43_P12252	3.80235	4.74679	4.46824	3.21153	3.10042	2.77371	3.94138	4.57259	4.71693	0.00814526	0.0400692	4.33913	4.4103	3.02855	0.485274	0.412459	0.227583
A_43_P12266	4.26921	5.99267	5.84187	1.2619	2.62473	1.24859	1.21394	1.5338	1.28329	0.00086615	0.0170495	5.36792	1.34368	1.71174	0.95449	0.16826	0.790701
A_43_P12275	13.1331	13.4011	12.7158	11.7691	12.0588	12.2992	11.3296	11.2308	11.0455	0.000392523	0.0125043	13.0833	11.202	12.0424	0.34534	0.144216	0.265447
A_43_P12277	4.97359	4.93469	5.04069	6.03283	5.79718	5.50635	5.22506	5.37491	5.39372	0.00304843	0.0280471	4.98299	5.33123	5.77879	0.0536222	0.092426	0.26372
A_43_P12291	6.35867	6.202	6.32704	6.32477	6.63162	6.35964	7.49824	7.53562	6.93743	0.00255879	0.0264361	6.2959	7.32376	6.43868	0.0828484	0.335098	0.167998
A_43_P12379	7.20429	7.17827	7.22173	6.87501	6.79454	6.73364	6.84723	6.71172	7.01255	0.00463315	0.0322243	7.20143	6.85717	6.80107	0.0218711	0.150656	0.070909
A_43_P12418	15.0263	15.0305	15.0005	14.985	14.8482	14.9725	14.8367	14.7236	14.7996	0.0061193	0.0359987	15.0191	14.7866	14.9352	0.0162205	0.0576656	0.0756184
A_43_P12448	10.3458	10.2617	9.8853	10.6813	11.1573	10.9699	10.951	11.3186	11.1466	0.00412305	0.0309798	10.1643	11.1387	10.9362	0.245227	0.183926	0.239827
A_43_P12451	6.13669	6.96381	7.26526	5.27393	4.91342	5.3147	5.796	6.28912	6.52566	0.00890726	0.0415376	6.78859	6.20359	5.16735	0.58433	0.372269	0.220857
A_43_P12473	6.95553	7.42784	7.43674	5.82149	5.65016	6.34543	6.04178	5.92029	5.77036	0.00134163	0.0199867	7.27337	5.91081	5.93903	0.275292	0.135961	0.362231
A_43_P12519	9.96006	10.2763	10.0779	9.16236	9.55354	9.36031	9.38966	9.69821	9.48792	0.00421674	0.0312571	10.1048	9.52526	9.35874	0.159827	0.15763	0.195595
A_43_P12529	6.85621	7.04215	7.09576	6.65277	6.72939	6.76143	6.59351	6.72578	6.63043	0.00648424	0.0367719	6.99804	6.64991	6.71453	0.125716	0.0682538	0.0558346
A_43_P12591	1.68099	1.6214	1.61698	1.56361	1.52257	1.53561	1.47186	1.46614	1.51095	0.00130007	0.0197934	1.63979	1.48298	1.54059	0.0357487	0.0243898	0.020966
A_43_P12602	14.9296	14.7268	14.7529	14.347	14.2623	14.2114	14.0148	13.1183	13.5319	0.00382348	0.0303606	14.8031	13.555	14.2736	0.110337	0.448729	0.0684741
A_43_P12607	5.99495	5.26979	5.74196	5.85899	5.67632	5.72376	7.08288	6.99824	6.90799	0.000593744	0.0142351	5.6689	6.99637	5.75302	0.368061	0.0874595	0.0947849
A_43_P12622	14.2821	14.3215	14.2606	13.772	13.7392	13.772	13.8869	13.4236	13.5828	0.0024645	0.0260374	14.2881	13.6311	13.7611	0.0308866	0.235366	0.0189365
A_43_P12641	6.94563	5.89784	6.66451	8.15363	7.95055	8.25118	8.2111	8.13556	8.2033	0.00116035	0.0190044	6.50266	8.18332	8.11846	0.542324	0.0415401	0.15337
A_43_P12656	1.67821	1.62623	1.61757	1.54344	1.51828	1.52332	1.47199	1.46354	1.5093	0.000598871	0.0142888	1.64067	1.48161	1.52835	0.0327938	0.0243512	0.0133123
A_43_P12687	10.1164	10.2446	10.4775	9.78179	9.81761	9.82817	9.73559	9.60611	9.85331	0.00392403	0.0305339	10.2795	9.73167	9.80919	0.183019	0.123649	0.0243051
A_43_P12709	2.49157	2.66494	2.66868	2.87168	2.56503	2.67714	3.55007	3.96635	4.33412	0.00102134	0.0183204	2.6084	3.95018	2.70461	0.101195	0.392274	0.155159
A_43_P12727	9.8853	10.7054	10.6726	8.68321	8.82804	9.03234	9.18075	9.56378	9.59933	0.00257124	0.0264552	10.4211	9.44795	8.84786	0.464295	0.232084	0.175408
A_43_P12729	11.719	11.8698	11.9201	11.5676	11.2902	11.6501	11.2436	11.359	11.261	0.0058578	0.035208	11.8363	11.2879	11.5026	0.104637	0.0622317	0.188559
A_43_P12749	12.4945	12.6107	12.3726	12.5341	12.3748	12.264	11.8642	12.0682	11.9308	0.0034021	0.0292671	12.4926	11.9544	12.3909	0.119072	0.104005	0.135752
A_43_P12751	10.9988	10.8394	11.0852	12.2846	11.7802	11.9435	11.7037	11.8512	12.169	0.00195156	0.0233704	10.9745	11.908	12.0028	0.124713	0.237832	0.257385
A_43_P12779	3.25823	3.08029	3.35524	3.52679	3.26466	3.69335	4.01448	3.74184	4.03247	0.00787776	0.0394941	3.23126	3.9296	3.49493	0.139449	0.162851	0.216113
A_43_P12780	5.90871	5.85259	5.70845	6.06871	6.08416	6.09719	6.09053	6.28298	6.22519	0.00381428	0.0303606	5.82325	6.19957	6.08335	0.103303	0.098748	0.0142608
A_43_P12801	8.35903	8.36476	8.40276	8.15124	8.20036	8.21233	8.10961	8.03211	7.97954	0.000276245	0.0114795	8.37552	8.04042	8.18798	0.023769	0.0654349	0.0323735
A_43_P12808	2.19529	1.94207	2.46457	3.36402	2.16234	1.76296	4.18338	3.83694	4.12274	0.00895552	0.0416199	2.20065	4.04769	2.42977	0.261291	0.185015	0.833356
A_43_P12834	7.10333	7.238	6.87737	6.78111	6.69247	6.65955	7.29985	7.28461	7.17178	0.00378133	0.0303318	7.0729	7.25208	6.71104	0.182231	0.0699564	0.0628685
A_43_P12837	8.6909	8.7579	8.42776	8.95364	9.0613	8.91499	9.21078	9.03685	9.0752	0.00717763	0.0381718	8.62552	9.10761	8.97664	0.174516	0.0913833	0.0758203
A_43_P12855	5.07538	5.11177	5.02937	4.39065	4.0395	4.29726	4.5299	3.73681	3.86581	0.00739432	0.0386607	5.07218	4.04418	4.24247	0.04129	0.425566	0.181872
A_43_P12888	7.95634	7.95901	8.21341	7.37012	7.1844	7.24852	7.17827	7.19725	7.43695	0.000496911	0.0135271	8.04292	7.27082	7.26768	0.147655	0.144183	0.0943296
A_43_P12915	4.67459	4.82538	4.85233	4.8776	5.39989	5.18019	5.97287	5.7093	5.72947	0.00135239	0.0200773	4.7841	5.80388	5.15256	0.0957905	0.146698	0.262238
A_43_P12922	11.7941	11.7135	11.6833	12.1112	12.1025	12.0259	12.1995	12.1609	12.0249	0.00071553	0.0155135	11.7303	12.1284	12.0799	0.0572876	0.0917272	0.0469593
A_43_P12932	1.89072	2.38897	1.96847	2.28932	1.97707	2.85041	4.14946	3.52905	3.7171	0.00205842	0.0240015	2.08272	3.79854	2.37227	0.268053	0.318123	0.442541
A_43_P12955	11.1864	12.0484	11.649	11.1595	11.247	11.1935	12.1902	13.18	12.8136	0.00690841	0.0376502	11.6279	12.7279	11.2	0.431387	0.500438	0.0441257
A_43_P12961	13.2032	13.166	13.2299	12.6901	12.9012	12.928	12.5834	12.6923	12.7219	0.000855904	0.017027	13.1997	12.6659	12.8398	0.0320935	0.0729479	0.130305
A_43_P13000	11.6253	11.5071	11.5481	12.0282	11.8635	12.1047	11.8629	11.899	11.9684	0.0016624	0.0217772	11.5602	11.9101	11.9988	0.0600472	0.0536379	0.123284
A_43_P13001	1.98839	1.79675	1.83494	1.76559	1.63597	1.76397	1.58371	1.60232	1.5308	0.00822727	0.0401697	1.87336	1.57228	1.72185	0.101432	0.0371081	0.0743709
A_43_P13021	2.51433	2.57359	2.31803	1.44202	1.90819	1.51423	1.37349	1.87691	1.78824	0.00638802	0.0365459	2.46865	1.67954	1.62148	0.133761	0.268737	0.25091
A_43_P13030	11.1573	11.3085	11.2479	10.6738	10.7981	10.9972	10.5638	10.3903	10.4953	0.000623515	0.0145937	11.2379	10.4831	10.8231	0.0760421	0.0874047	0.163148
A_43_P13056	3.45755	3.14724	3.03913	1.96869	1.87563	1.68369	2.92946	3.81708	3.52207	0.00132233	0.0199215	3.21464	3.42287	1.84267	0.217199	0.452051	0.145329
A_43_P13124	9.93431	10.0542	10.0291	10.0155	10.2493	10.0575	9.78295	9.77113	9.73721	0.00554275	0.0345786	10.0059	9.76377	10.1074	0.0632313	0.0237417	0.124684
A_43_P13144	5.76008	5.54947	6.15946	5.35069	4.84379	5.19898	3.9853	3.84325	4.86386	0.00765224	0.0391912	5.823	4.23081	5.13115	0.309825	0.552823	0.260167
A_43_P13172	5.93191	6.44168	6.31266	6.34225	6.66007	6.14691	7.4498	7.04119	7.51432	0.00399603	0.0305832	6.22875	7.3351	6.38308	0.265043	0.256575	0.259003
A_43_P13175	7.07665	7.34427	7.02504	6.3669	6.30185	6.39731	5.80428	6.20973	5.74312	0.000441054	0.0130068	7.14865	5.91904	6.35536	0.171361	0.253594	0.0487689
A_43_P13177	12.1598	12.3327	12.3575	11.8833	11.749	11.948	11.8418	11.7274	11.9742	0.00471631	0.0324727	12.2833	11.8478	11.8601	0.107737	0.123519	0.101526
A_43_P13248	1.34072	2.12491	1.33361	1.32451	1.31561	1.30123	2.67476	2.84809	2.7972	0.00122332	0.0195099	1.59974	2.77335	1.31378	0.454816	0.0890921	0.0117486
A_43_P13291	3.50208	3.95506	3.28404	4.17158	3.82448	3.6144	5.0239	4.85199	4.84436	0.00191017	0.0232327	3.58039	4.90675	3.87015	0.342297	0.101526	0.281383
A_43_P13346	4.14908	4.18429	4.42481	3.93254	3.71623	4.0836	3.04087	2.67216	2.438	0.000357485	0.0124372	4.25273	2.71701	3.91079	0.150065	0.303924	0.18465
A_43_P13358	1.18207	1.19329	1.18247	1.19198	1.176	1.21738	1.8743	1.78557	1.52154	0.0011909	0.0192603	1.18595	1.72714	1.19512	0.00636324	0.183497	0.0208674
A_43_P13380	1.56246	1.52628	1.51861	1.50446	1.45919	1.48278	1.39709	1.39283	1.45412	0.00475127	0.0325271	1.53579	1.41468	1.48214	0.0234188	0.0342246	0.0226444
A_43_P13454	2.15439	1.89289	1.9523	1.8325	1.70728	1.92055	1.64303	1.58442	1.53974	0.00871268	0.0410009	1.99986	1.58906	1.82011	0.137084	0.0518036	0.107173
A_43_P13457	2.22466	1.96493	2.08303	1.80569	1.75651	1.76054	1.57284	1.51207	1.50863	0.00040985	0.0126943	2.09088	1.53118	1.77425	0.130042	0.0361163	0.0273027
A_43_P13536	8.62671	8.70332	8.56636	8.96902	8.98583	9.15419	8.93234	8.99214	8.73025	0.00977759	0.0430826	8.63213	8.88491	9.03635	0.068639	0.137233	0.102401
A_43_P13675	1.56393	1.51414	1.53723	1.96327	1.48239	1.48723	2.77405	2.10572	2.56875	0.00737705	0.0386607	1.53843	2.48284	1.64429	0.0249152	0.342347	0.276248
A_43_P13742	3.83124	3.47272	3.9094	5.03909	4.80534	4.82214	3.98073	4.48538	4.64381	0.00416363	0.031118	3.73779	4.36997	4.88886	0.23286	0.346277	0.130376
A_43_P13762	5.65369	5.65349	5.59638	5.66693	6.10355	5.86455	7.24544	6.91929	6.85321	0.000163974	0.00956133	5.63452	7.00598	5.87834	0.033031	0.209994	0.218636
A_43_P13772	1.44808	1.41876	1.44507	1.41008	1.40198	1.40125	1.36835	1.35744	1.37813	0.000936901	0.0176293	1.4373	1.36798	1.40444	0.0161301	0.0103491	0.00490315
A_43_P13822	4.34532	4.25092	4.86181	5.55017	5.29573	5.2328	4.54027	4.28414	4.71914	0.00794117	0.0396	4.48602	4.51452	5.35957	0.328851	0.218643	0.168039
A_43_P13847	2.92857	3.06485	2.88569	4.43976	4.39416	3.68639	4.36276	3.91367	4.56474	0.00379164	0.0303606	2.95971	4.28039	4.17343	0.0935507	0.33326	0.422412
A_43_P13946	13.02	13.0622	12.8486	12.6993	12.6856	12.6312	12.6715	12.7219	12.7692	0.00491503	0.0329794	12.9769	12.7209	12.672	0.113127	0.0488738	0.0360193
A_43_P13962	14.4992	14.5926	14.4524	14.239	14.2171	14.148	14.3822	14.3037	14.33	0.00125274	0.0195942	14.5147	14.3386	14.2013	0.0713637	0.039958	0.0474933
A_43_P14014	13.3462	13.2596	13.2166	13.5711	13.5081	13.6422	13.4734	13.3939	13.3267	0.00519701	0.0337763	13.2741	13.398	13.5738	0.0660374	0.073418	0.0670873
A_43_P14080	11.9266	11.8367	11.7659	12.4985	12.4476	12.2284	12.4618	12.2293	12.5244	0.00289347	0.0275709	11.8431	12.4052	12.3915	0.080552	0.155475	0.143533
A_43_P14147	10.511	10.3019	10.4599	10.8344	10.7509	11.0888	10.7288	10.6948	10.8216	0.00999801	0.0434696	10.4243	10.7484	10.8914	0.109052	0.0656617	0.176016
A_43_P14179	13.8951	13.972	14.2114	13.5468	13.6824	13.4951	13.7364	13.7286	13.8112	0.00800641	0.0397418	14.0262	13.7587	13.5748	0.164979	0.0456058	0.0967377
A_43_P14186	7.06245	6.94519	6.95074	7.29799	7.2918	7.35101	6.988	6.96054	7.03901	0.000251902	0.0109292	6.98612	6.99585	7.3136	0.0661561	0.0398159	0.0325459
A_43_P14228	11.9651	12.9721	12.8704	10.9666	11.2676	11.4019	12.3165	13.023	12.4132	0.00910792	0.0417995	12.6025	12.5842	11.212	0.554372	0.38306	0.22286
A_43_P14233	9.65403	10.402	10.3611	8.12921	8.21272	8.45367	8.29344	8.73479	8.47952	0.000427147	0.0127802	10.1391	8.50258	8.2652	0.420549	0.221579	0.168474
A_43_P14318	12.0379	12.0722	11.7742	12.3232	12.5541	12.4985	12.2166	12.0354	12.1208	0.00846741	0.0405946	11.9614	12.1243	12.4586	0.163091	0.0906771	0.120515
A_43_P14382	12.1965	12.1902	11.8392	11.2263	11.4561	11.0399	11.359	11.3984	11.2069	0.00222806	0.024893	12.0753	11.3214	11.2407	0.204464	0.101139	0.208478
A_43_P14436	7.243	6.66242	6.45133	4.31851	4.90019	4.20377	4.89154	4.89154	5.06274	0.000290826	0.011602	6.78559	4.94861	4.47416	0.409954	0.0988429	0.373386
A_43_P14460	10.1555	10.2389	10.0495	10.9863	11.0956	10.9802	11.3168	11.3446	11.1374	1.44583e-05	0.00386244	10.148	11.2663	11.0207	0.0949473	0.112441	0.0649453
A_43_P14470	10.0524	10.3125	10.1517	8.39245	8.52858	8.76417	8.65823	9.38044	9.46782	0.00140117	0.020351	10.1722	9.16883	8.56174	0.131269	0.444347	0.188069
A_43_P14474	1.67437	1.62371	1.61577	1.54175	1.51687	1.52273	1.47095	1.46282	1.50839	0.000570812	0.0141279	1.63795	1.48072	1.52712	0.0317944	0.0243092	0.0130073
A_43_P14482	12.5114	12.3384	12.2887	12.6869	12.6502	12.5868	12.4031	12.3362	12.3362	0.00710179	0.0380392	12.3795	12.3585	12.6413	0.116909	0.0386392	0.0506127
A_43_P14621	16.3969	16.2752	16.5986	15.8183	15.7292	15.915	15.963	16.0343	16.1615	0.0027909	0.0274323	16.4236	16.0529	15.8209	0.16333	0.100554	0.092961
A_43_P14863	13.5081	13.4377	13.5767	13.3158	13.2534	13.186	13.3142	13.1611	13.2208	0.00532944	0.0342476	13.5075	13.232	13.2517	0.0695264	0.0771564	0.0648812
A_43_P14927	12.2872	12.2362	12.0527	13.0137	13.0092	12.7558	13.0983	13.0185	13.0159	0.000192491	0.0100688	12.192	13.0442	12.9262	0.123313	0.0468261	0.147623
A_43_P14931	11.4019	11.2009	11.2531	12.315	12.1704	12.2054	12.6107	12.185	12.5188	0.000172389	0.00973187	11.2853	12.4381	12.2303	0.104264	0.224036	0.075425
A_43_P14971	15.8755	15.8423	15.8847	15.8092	15.766	15.7854	15.6377	15.5983	15.5567	8.10116e-05	0.00758294	15.8675	15.5976	15.7869	0.0223306	0.0404913	0.0216014
A_43_P14985	15.0503	15.0777	15.0891	15.5111	15.5567	15.5056	15.4865	15.5809	15.6109	1.34988e-05	0.00377598	15.0724	15.5594	15.5245	0.0199568	0.064922	0.0280622
A_43_P15012	10.2204	10.5167	10.3172	9.82249	9.54527	9.9137	9.69313	9.33448	9.80086	0.00867128	0.0408878	10.3515	9.60949	9.76049	0.15109	0.24418	0.191885
A_43_P15057	12.4075	12.303	12.0975	12.0509	11.9962	11.8869	11.6998	11.8341	11.8635	0.00678551	0.0374995	12.2693	11.7991	11.978	0.157726	0.0872574	0.0834961
A_43_P15106	4.7836	5.60665	5.84096	3.47031	2.52082	3.3479	1.80877	2.1886	3.31781	0.00277783	0.0273741	5.4104	2.43839	3.11301	0.555328	0.784917	0.516491
A_43_P15169	8.63134	8.41196	8.47028	8.21272	8.13439	8.35274	7.85074	7.70338	8.08843	0.00550142	0.0345209	8.50453	7.88085	8.23328	0.113629	0.194283	0.110614
A_43_P15246	4.79438	4.73195	4.47738	4.91004	4.73116	4.98545	5.2181	5.70491	5.54056	0.00437357	0.0314732	4.6679	5.48786	4.87555	0.167921	0.24765	0.130611
A_43_P15263	1.45039	1.43017	1.44782	1.39806	1.45753	1.43573	1.7932	1.61026	1.6133	0.00558377	0.0346536	1.44279	1.67225	1.43044	0.0110101	0.104753	0.0300871
A_43_P15280	9.11427	9.18349	8.95884	8.92618	8.77334	8.82324	8.21132	8.39052	7.71028	0.00372291	0.0302911	9.08553	8.10404	8.84092	0.115051	0.352583	0.0779394
A_43_P15292	15.8183	15.9687	15.9338	15.8305	15.9338	15.8183	16.1526	16.3969	16.1935	0.00487395	0.0328794	15.9069	16.2476	15.8609	0.0786993	0.130836	0.0634418
A_43_P15297	1.54327	1.50483	1.52404	1.51675	1.47217	1.47242	1.42405	1.4204	1.45939	0.0077132	0.0393081	1.52405	1.43461	1.48711	0.0192233	0.0215342	0.0256689
A_43_P15344	11.631	11.5253	11.6057	11.8944	11.8597	11.8714	11.7376	11.6786	11.7053	0.000252045	0.0109292	11.5873	11.7072	11.8752	0.0551795	0.0295509	0.0176198
A_43_P15445	1.76423	1.61065	1.75093	1.6051	1.59854	1.61164	2.03976	2.23562	1.88985	0.00613894	0.036001	1.7086	2.05508	1.60509	0.0850884	0.173392	0.00655006
A_43_P15454	2.25348	1.97065	2.03475	1.86352	1.74472	1.95042	1.66271	1.57821	1.54309	0.00467737	0.0323502	2.08629	1.59467	1.85289	0.148293	0.0614841	0.103262
A_43_P15517	6.50214	6.83392	6.82152	7.96622	7.42401	7.42878	7.55468	8.4112	7.83205	0.00990312	0.0432431	6.71919	7.93264	7.60634	0.188079	0.43703	0.311678
A_43_P15565	6.6151	7.00256	6.69325	6.95923	6.95693	7.10065	7.30055	7.86691	7.49948	0.00956348	0.042714	6.7703	7.55565	7.0056	0.204899	0.287329	0.0823221
A_43_P15593	1.49362	2.28463	1.53199	2.06008	3.19939	3.24291	4.44308	4.46569	4.26508	0.00142351	0.0204567	1.77008	4.39128	2.83413	0.446031	0.109873	0.670697
A_43_P15598	6.0465	4.76463	4.56474	1.8674	1.75487	1.96644	1.94878	2.10285	2.54975	0.000381549	0.0124518	5.12529	2.20046	1.8629	0.804028	0.312153	0.105857
A_43_P15600	12.5091	12.4895	12.4424	12.3587	12.2776	12.2753	12.1778	12.0555	11.9397	0.00153238	0.0210635	12.4803	12.0577	12.3039	0.0342739	0.119089	0.0475472
A_43_P15623	6.05766	6.16597	6.17697	6.74856	6.65696	6.64779	6.35925	6.34392	6.62649	0.00195586	0.0233704	6.13353	6.44322	6.68444	0.0659369	0.158902	0.0557194
A_43_P15640	10.3392	10.2417	10.0569	10.3442	10.4454	10.4763	9.83827	10.0073	10.0712	0.00894876	0.0416199	10.2126	9.97224	10.422	0.143368	0.120336	0.0690712
A_43_P15662	4.99634	5.01302	5.13812	6.75322	6.91236	6.61886	6.14605	6.32146	6.74095	0.000104743	0.00825445	5.04916	6.40282	6.76148	0.0774887	0.305679	0.146925
A_43_P15713	11.4107	11.4905	11.4669	11.2841	11.3018	11.3069	11.521	11.4267	11.55	0.00339416	0.0292156	11.4561	11.4992	11.2976	0.0409855	0.0644819	0.011992
A_43_P15719	12.8247	12.9738	12.8247	13.2299	13.3395	13.2596	13.3643	13.3685	13.5251	0.000398448	0.012549	12.8744	13.4193	13.2763	0.0860494	0.0916772	0.0566663
A_43_P15819	1.66035	1.61882	1.60852	1.52229	1.50757	1.50899	1.46576	1.45718	1.50332	0.000322843	0.0119857	1.62923	1.47542	1.51295	0.027437	0.0245411	0.00812206
A_43_P15840	3.12565	3.6811	3.54107	1.33434	2.19014	2.38528	1.35584	1.34502	1.2695	0.00101573	0.0182855	3.44927	1.32345	1.96992	0.288883	0.0470394	0.559008
A_43_P15866	5.9952	5.97378	6.05518	6.05534	6.0653	6.2656	5.76292	5.64068	5.67385	0.00153429	0.0210635	6.00805	5.69248	6.12875	0.0421943	0.0632145	0.118624
A_43_P15923	4.38553	4.73396	4.80186	5.15895	5.10019	5.06706	5.30275	5.31953	5.0418	0.00944372	0.0424896	4.64045	5.22136	5.10874	0.223365	0.155733	0.0465363
A_43_P15924	3.02872	2.91531	3.25243	3.84206	3.11776	3.22143	1.87901	2.38819	2.25542	0.00531696	0.0342115	3.06549	2.17421	3.39375	0.171541	0.264126	0.391691
A_43_P15937	8.42291	8.23066	8.87859	10.155	10.2528	9.30628	10.5504	10.0601	10.2594	0.00299145	0.0278702	8.51072	10.29	9.90469	0.332772	0.246609	0.52054
A_43_P15942	4.27713	4.2144	4.19518	1.51578	1.84514	1.40872	3.69213	3.5939	3.24879	6.78375e-06	0.00281903	4.22891	3.51161	1.58988	0.0428561	0.232843	0.227448
A_43_P16047	2.74156	2.6031	2.98931	3.5475	3.221	3.53387	3.66157	3.26377	3.78434	0.00979487	0.0430826	2.77799	3.56989	3.43412	0.195667	0.272126	0.184695
A_43_P16067	2.95302	2.85348	3.70662	1.32021	1.35734	1.39182	1.33337	1.30056	1.22285	0.000225649	0.0104448	3.17104	1.28559	1.35645	0.466491	0.0567634	0.0358116
A_43_P16069	1.36286	1.36141	1.36579	1.35229	1.33734	1.44497	2.13391	2.59844	3.3076	0.00497184	0.0330067	1.36335	2.67998	1.3782	0.0022273	0.59108	0.0583088
A_43_P16130	1.49087	1.44918	1.48502	1.44813	1.4417	1.46192	1.40003	1.38885	1.39685	0.00150865	0.0209363	1.47502	1.39524	1.45058	0.0225696	0.00576162	0.0103329
A_43_P16139	6.29681	6.0627	6.28321	6.21568	5.64222	6.26637	5.28933	5.082	5.34417	0.00420608	0.0312284	6.21424	5.2385	6.04142	0.131413	0.138277	0.34665
A_43_P16160	3.49057	3.88832	3.57671	1.26698	1.24329	1.30562	1.29523	1.2918	1.21724	5.44918e-07	0.000783543	3.65186	1.26809	1.27196	0.209254	0.0440724	0.0314601
A_43_P16163	4.56453	4.42021	4.02174	4.43026	4.64674	4.65978	5.72457	5.50112	4.96627	0.00932711	0.0422062	4.33549	5.39732	4.57893	0.281136	0.389659	0.128917
A_43_P16193	2.96016	3.00876	3.05365	3.7861	4.44109	4.36045	4.16293	4.01332	4.91499	0.0059635	0.0355441	3.00752	4.36374	4.19588	0.0467595	0.483216	0.357163
A_43_P16196	4.89809	3.92531	5.07118	3.22773	3.09375	2.76406	2.75988	2.31438	1.22071	0.00562739	0.0346736	4.63153	2.09832	3.02852	0.61769	0.792007	0.238621
A_43_P16309	1.61975	1.6095	1.58497	1.46616	1.47886	1.46745	1.44661	1.44057	1.47597	4.06925e-05	0.00576278	1.60474	1.45438	1.47082	0.0178748	0.0189336	0.00699099
A_43_P16353	5.17982	5.51368	5.19469	5.38472	5.66471	5.60411	6.58822	6.54819	6.33996	0.00020847	0.0104278	5.29606	6.49212	5.55118	0.188608	0.133291	0.147313
A_43_P16358	2.25225	1.93494	2.01731	1.88256	1.70948	1.98246	1.63394	1.57961	1.48236	0.0097918	0.0430826	2.06817	1.5653	1.85817	0.164653	0.0767977	0.138114
A_43_P16372	1.51947	1.49229	1.47259	1.46063	1.40607	1.40635	1.35812	1.35059	1.40965	0.00645768	0.0367187	1.49478	1.37279	1.42435	0.0235388	0.0321451	0.0314214
A_43_P16416	1.56011	1.52316	1.52646	1.5238	1.47489	1.50314	2.98968	2.80954	2.08655	0.00386319	0.0304934	1.53658	2.62859	1.50061	0.0204493	0.477981	0.0245558
A_43_P16529	9.90041	9.83982	9.57124	10.416	10.5334	10.8774	11.3249	11.6044	11.1058	0.000419338	0.0127232	9.77049	11.345	10.6089	0.175196	0.249879	0.239815
A_43_P16567	15.0859	14.8329	14.8744	14.4164	14.5165	14.6291	14.51	14.4372	14.3641	0.00293829	0.0277856	14.9311	14.4371	14.5207	0.13567	0.072985	0.106409
A_43_P16643	7.78968	7.88174	8.04159	8.20396	8.17779	8.37111	8.16914	8.29273	8.31695	0.00978867	0.0430826	7.90434	8.25961	8.25095	0.127463	0.079275	0.104877
A_43_P16688	4.10323	4.05587	4.19491	4.27494	4.04586	4.58501	3.44639	3.43001	3.23304	0.00140843	0.0203753	4.118	3.36981	4.30194	0.070691	0.118733	0.270591
A_43_P16762	8.26041	8.05544	8.0334	8.56909	8.47971	8.8366	8.46469	8.70043	8.58829	0.00920616	0.0419751	8.11642	8.58447	8.62847	0.12519	0.117917	0.185703
A_43_P16767	15.4797	15.4997	15.6681	15.1684	15.3063	15.0567	15.2538	15.1055	15.0534	0.00726964	0.0384561	15.5491	15.1376	15.1772	0.103509	0.103983	0.125032
A_43_P16778	10.5997	10.5921	10.6252	10.6913	10.7695	10.7599	10.9737	10.866	10.8167	0.00206227	0.0240277	10.6057	10.8855	10.7403	0.017305	0.0803074	0.0426543
A_43_P16784	11.652	11.6712	11.7559	11.3168	11.3407	11.4124	11.3723	11.4583	11.5192	0.00126893	0.0196215	11.693	11.4499	11.3567	0.055296	0.0738119	0.0497818
A_43_P16811	4.76552	4.97198	5.32518	6.34368	5.91	5.80863	5.71228	5.9541	5.91643	0.00494973	0.0330067	5.02089	5.86094	6.02077	0.283017	0.130116	0.284202
A_43_P16842	13.0805	12.8056	12.7871	13.1494	13.1743	13.3142	13.829	13.4704	13.9396	0.00305787	0.028054	12.8911	13.7463	13.2126	0.164296	0.245321	0.0888164
A_43_P16885	7.23773	7.24086	7.12619	8.47228	8.51995	8.75659	8.12171	8.58868	8.24763	0.000128824	0.00896376	7.20159	8.31934	8.58294	0.0653243	0.241602	0.152263
A_43_P17007	7.62077	7.84927	8.01543	7.56319	7.37047	7.60809	7.06993	7.1021	6.61886	0.00496763	0.0330067	7.82849	6.9303	7.51392	0.198151	0.270192	0.126238
A_43_P17027	11.1519	11.0035	11.2115	10.9503	10.8838	10.9029	10.7776	10.7668	10.8903	0.00651762	0.0368238	11.1223	10.8116	10.9123	0.107096	0.0683995	0.0342257
A_43_P17060	2.28225	1.75626	1.84342	2.36755	2.41244	2.89893	1.60187	1.57468	1.57071	0.00644996	0.0367027	1.96064	1.58242	2.55964	0.281909	0.0169601	0.294687
A_43_P17067	1.48451	1.44083	1.48428	1.44266	1.44651	1.47808	2.03416	1.7474	1.80449	0.00224886	0.0249986	1.46987	1.86202	1.45575	0.0251521	0.151787	0.0194308
A_43_P17093	6.18773	5.85005	5.92621	5.67697	5.61242	5.82035	5.36983	4.88872	4.96124	0.00294409	0.0277881	5.98799	5.07327	5.70325	0.177113	0.259381	0.106429
A_43_P17109	6.75563	6.59839	6.75355	7.37066	7.34633	7.22173	7.06484	7.09249	6.7676	0.0029497	0.0277881	6.70252	6.97498	7.31291	0.0901877	0.180127	0.0798961
A_43_P17139	10.7574	11.1513	11.1644	10.2506	10.174	10.5334	10.3606	10.4499	10.1482	0.00640967	0.0365987	11.0244	10.3196	10.3193	0.231321	0.154983	0.18927
A_43_P17160	7.88978	8.01543	8.11315	7.89419	7.9053	8.00606	7.694	7.71908	7.52546	0.00811293	0.0399649	8.00612	7.64618	7.93518	0.111975	0.105296	0.0616284
A_43_P17192	10.1249	9.97597	9.94271	10.4594	10.4974	10.4932	10.5678	10.6853	10.4812	0.000332628	0.0121073	10.0145	10.5781	10.4833	0.0970145	0.102442	0.0208282
A_43_P17202	6.4871	6.28803	6.23597	7.16549	7.05425	6.88663	7.06433	7.1036	7.14546	0.000302668	0.01177	6.33703	7.10446	7.03546	0.132543	0.0405707	0.140379
A_43_P17230	8.80477	8.75498	8.72385	9.19601	9.09433	9.16704	9.21545	9.08455	9.07725	0.000314346	0.0118912	8.7612	9.12575	9.15246	0.0408175	0.0777677	0.0523842
A_43_P17374	6.31873	5.16197	6.13502	6.16644	5.86495	6.19978	7.41424	7.23727	7.26786	0.00709116	0.0380392	5.87191	7.30646	6.07706	0.621649	0.0945868	0.184443
A_43_P17387	6.41737	6.3669	6.48576	6.91343	6.67661	6.92858	6.6667	6.8065	6.62534	0.00738532	0.0386607	6.42334	6.69951	6.83954	0.05965	0.0949351	0.141307
A_43_P17404	3.41138	3.691	3.59501	4.00338	3.15781	3.78894	2.29607	2.15016	2.47573	0.00190248	0.023158	3.5658	2.30732	3.65004	0.142076	0.163079	0.439566
A_43_P17415	7.37827	7.14759	7.68622	7.77607	7.5154	7.47176	8.25004	8.00779	8.46258	0.00896621	0.0416308	7.40403	8.24014	7.58774	0.270239	0.227556	0.164546
A_43_P17424	7.92964	7.8034	7.71736	5.94955	5.80998	6.06871	5.7828	6.15789	5.37131	9.23847e-05	0.00795467	7.8168	5.77067	5.94275	0.106773	0.39343	0.129497
A_43_P17507	8.66443	9.43237	9.21478	6.91214	7.24391	6.97897	7.78099	8.58749	8.39905	0.00106587	0.0187215	9.10386	8.25585	7.045	0.395801	0.421891	0.175469
A_43_P17583	6.0773	5.69046	6.00412	5.89968	5.92674	5.85196	7.1993	6.9103	6.47996	0.00414995	0.0310863	5.92396	6.86319	5.89279	0.205501	0.361979	0.0378648
A_43_P17681	6.90442	6.90039	6.80473	7.65711	7.71801	7.26558	7.47981	7.4053	7.29885	0.00404514	0.0306407	6.86985	7.39465	7.5469	0.0564272	0.0909488	0.245525
A_43_P17909	8.09189	7.9731	8.11538	8.13007	8.2058	8.10572	8.38769	8.31329	8.39283	0.00194471	0.023349	8.06012	8.36461	8.1472	0.0762704	0.0445141	0.0521929
A_43_P17969	2.30509	1.78574	1.27551	5.5402	5.43297	6.036	5.42192	5.51973	5.29298	1.81751e-05	0.00425378	1.78878	5.41154	5.66972	0.514795	0.11373	0.321705
A_43_P17976	5.69501	5.17084	5.38176	4.96897	5.10491	5.08041	4.76152	4.7572	4.36479	0.00973966	0.0430111	5.41587	4.62784	5.05143	0.263743	0.227814	0.0724542
A_43_P18014	7.02699	7.43723	7.10714	6.43141	6.45162	6.65116	6.55029	6.41719	5.99141	0.00685039	0.0376218	7.19045	6.31963	6.5114	0.217441	0.291935	0.121459
A_43_P18148	4.80007	5.33386	5.00804	5.29492	5.15227	5.18039	5.98165	5.96356	6.43626	0.00211521	0.0242666	5.04732	6.12716	5.20919	0.269057	0.267843	0.0755585
A_43_P18178	10.4563	10.4392	10.4769	10.8977	10.8287	10.7065	10.8506	10.6682	10.7499	0.00291144	0.0276259	10.4575	10.7562	10.8109	0.018899	0.0913877	0.0968458
A_43_P18241	4.26411	5.61858	5.35854	1.20259	2.17767	1.53303	1.69428	1.69346	2.56054	0.000633222	0.014605	5.08041	1.98276	1.63776	0.718793	0.50037	0.495905
A_43_P18282	8.03589	8.05672	8.06112	8.27775	8.51191	8.31374	8.13993	7.97238	8.07488	0.00723902	0.0383399	8.05124	8.0624	8.3678	0.0134773	0.0844701	0.126096
A_43_P18346	10.9863	10.7033	10.6537	11.4676	11.3413	11.3467	11.6559	11.538	11.7691	0.000471665	0.0133638	10.7811	11.6543	11.3852	0.179416	0.115553	0.0713999
A_43_P18384	1.75035	1.65816	1.65482	1.62317	1.54248	1.56445	1.49541	1.48938	1.52119	0.00403676	0.0306392	1.68778	1.50199	1.5767	0.0542174	0.0168986	0.0417117
A_43_P18388	6.65179	6.66885	6.59693	6.98236	7.0066	7.08106	7.15181	6.86292	7.09065	0.00349403	0.0295482	6.63919	7.03513	7.02334	0.0375834	0.152234	0.0514384
A_43_P18389	1.28045	1.25352	1.26185	1.25208	1.24878	1.24043	1.7186	2.23041	1.80116	0.00323067	0.028704	1.26528	1.91672	1.2471	0.01379	0.274783	0.00600639
A_43_P18467	6.92807	7.58813	7.04272	6.08732	6.23334	5.89276	5.3223	5.8328	5.2864	0.000966463	0.0178497	7.18631	5.4805	6.07114	0.35268	0.305625	0.170869
A_43_P18475	8.51158	8.5709	8.67326	8.4359	8.42776	8.53677	8.86894	8.75498	8.68805	0.00930425	0.0421735	8.58525	8.77066	8.46681	0.0817907	0.0914572	0.0607232
A_43_P18482	1.57506	1.50403	1.60709	2.27627	2.30598	2.07899	2.82368	2.97403	2.23349	0.00363277	0.0299099	1.56206	2.67707	2.22041	0.0527456	0.391434	0.123372
A_43_P18492	4.77478	5.02648	4.86348	4.23618	3.95099	4.44735	5.57166	5.66716	5.09699	0.00221309	0.0247999	4.88825	5.44527	4.21151	0.127663	0.305375	0.249102
A_43_P18674	5.88354	6.21192	5.83126	6.79819	6.45133	6.59665	6.63823	6.47605	6.90965	0.00946096	0.0425061	5.97558	6.67464	6.61539	0.206345	0.219078	0.174187
A_43_P18792	2.02931	2.43604	2.24829	1.50918	1.98528	1.45643	3.57211	3.13174	2.89113	0.00165093	0.0217603	2.23788	3.19833	1.65029	0.203565	0.345336	0.2913
A_43_P18940	4.43079	4.56392	4.56314	5.21503	5.38642	5.5451	5.58671	6.32921	5.82399	0.00120668	0.0193828	4.51928	5.91331	5.38218	0.0766376	0.379221	0.165079
A_43_P18947	8.42595	8.48973	8.45106	8.82772	8.88072	8.92916	8.75048	8.53916	8.77592	0.00228954	0.0251154	8.45558	8.68852	8.8792	0.0321264	0.129974	0.050737
A_43_P18953	8.82243	8.84087	8.56077	8.1832	8.26987	8.17986	8.5811	8.7537	8.39628	0.00937755	0.0423354	8.74135	8.57703	8.21098	0.156665	0.178744	0.0510279
A_43_P19050	5.58233	5.62113	5.71328	5.44109	5.71609	5.53852	6.24596	6.07812	6.02665	0.00178042	0.0223585	5.63891	6.11691	5.56523	0.0672598	0.114688	0.13943
A_43_P19072	4.80581	4.9822	4.92679	5.19881	5.19628	5.18956	4.93125	4.95556	5.10969	0.00934838	0.0422641	4.90493	4.99883	5.19488	0.0902022	0.0967713	0.00477576
A_43_P19089	7.95859	8.16669	7.68271	7.76049	7.54889	7.91364	7.17768	7.31827	7.1256	0.00723684	0.0383399	7.936	7.20718	7.741	0.242779	0.0996646	0.183151
A_43_P19094	2.87147	3.77697	3.18234	3.21605	3.93217	2.74624	5.16319	4.64036	4.92454	0.00740462	0.0386607	3.27693	4.90936	3.29815	0.460105	0.261747	0.597214
A_43_P19181	6.11081	5.9541	6.05145	6.06128	6.03257	5.94434	5.85294	5.7181	5.69008	0.00693076	0.0376759	6.03879	5.75371	6.01273	0.079117	0.0870731	0.06094
A_43_P19193	2.68524	3.26466	3.51807	3.7251	4.32404	3.27393	5.19976	4.96273	5.20925	0.00252962	0.0263355	3.15599	5.12391	3.77436	0.426918	0.13967	0.526789
A_43_P19210	5.72726	6.06668	5.71873	6.25848	6.55795	6.38716	7.04622	6.99206	6.61692	0.00190248	0.023158	5.83755	6.88507	6.4012	0.198473	0.2338	0.150225
A_43_P19238	10.8717	11.6501	11.2339	9.88406	10.0379	10.0662	10.4661	10.6688	10.2985	0.00273252	0.0272887	11.2519	10.4778	9.99605	0.389535	0.185405	0.0980176
A_43_P19245	1.66907	2.33163	2.31585	3.03077	3.33974	3.38772	2.85088	3.44695	3.65557	0.00833905	0.0403207	2.10551	3.3178	3.25274	0.378055	0.4176	0.193726
A_43_P19267	8.5709	8.46508	8.41149	8.96067	8.96501	8.78408	9.01775	8.90954	9.29072	0.00471732	0.0324727	8.48249	9.07267	8.90326	0.0811207	0.196437	0.103229
A_43_P19276	9.09347	8.95208	9.21855	8.76588	8.74653	8.6686	8.79144	8.79814	8.9126	0.00746941	0.038752	9.08803	8.83406	8.727	0.133317	0.0681021	0.0514977
A_43_P19279	1.55696	1.52056	1.53103	1.5412	1.47936	1.4851	2.89372	2.78395	2.34268	0.000226647	0.0104448	1.53619	2.67345	1.50189	0.0187417	0.291663	0.0341661
A_43_P19324	5.13527	5.30339	4.34419	5.42704	5.40033	5.50713	6.25172	6.22398	6.40106	0.00422236	0.0312571	4.92762	6.29225	5.44484	0.51221	0.0952417	0.0555794
A_43_P19440	1.24087	1.25373	1.24898	2.99072	2.22994	3.41562	3.69425	3.66681	4.99295	0.00223617	0.0249286	1.24786	4.11801	2.87876	0.0065022	0.757853	0.600715
A_43_P19484	6.50096	6.83421	6.47356	6.80511	7.09372	6.72971	7.68752	7.14393	7.60062	0.0096645	0.0428769	6.60291	7.47735	6.87618	0.200778	0.292006	0.192132
A_43_P19503	2.24758	1.96296	2.06519	1.84986	1.75982	2.06838	1.63368	1.55687	1.52936	0.00711214	0.0380403	2.09191	1.5733	1.89269	0.144178	0.0540635	0.158673
A_43_P19560	5.60267	5.8061	5.7173	6.00562	5.92123	6.11755	5.59891	5.52886	5.51493	0.00155193	0.0211624	5.70869	5.54757	6.0148	0.101993	0.0450092	0.0984798
A_43_P19625	5.36564	5.47858	5.32956	5.29561	5.67318	5.1356	6.63709	6.34645	5.88565	0.00982382	0.043119	5.39126	6.28973	5.36813	0.0777459	0.378918	0.276032
A_43_P19626	6.96315	7.11771	6.72005	7.01522	7.12245	7.09693	7.51666	7.75029	7.47098	0.00412131	0.0309798	6.93364	7.57931	7.0782	0.200465	0.149826	0.0560146
A_43_P19663	6.07206	6.01304	6.0218	6.3825	6.32762	6.27225	5.91075	5.89716	5.81729	6.4792e-05	0.00703567	6.03563	5.87507	6.32746	0.0318455	0.0504961	0.0551279
A_43_P19669	5.60734	6.34054	5.73836	3.93798	4.24155	4.98	5.13649	5.30699	5.28341	0.00888016	0.041437	5.89541	5.24229	4.38651	0.391018	0.0923878	0.535921
A_43_P19776	4.91324	6.16068	5.92522	3.42741	3.24585	4.06319	4.48364	4.86708	4.50768	0.00491605	0.0329794	5.66638	4.61946	3.57882	0.66278	0.214776	0.429189
A_43_P19787	4.92928	4.97393	4.66578	4.33312	4.79219	4.57534	3.70348	4.03516	3.05441	0.00820255	0.0401518	4.85633	3.59768	4.56688	0.166526	0.498858	0.229653
A_43_P19791	9.58955	9.58449	9.53553	8.99661	8.96005	9.29251	9.1803	9.2263	9.21078	0.00356587	0.0297189	9.56986	9.20579	9.08306	0.0298358	0.0234052	0.182309
A_43_P19806	7.1803	7.60323	7.24643	5.04526	4.91266	5.12489	5.56613	7.0112	6.95851	0.00345003	0.0294423	7.34332	6.51195	5.0276	0.227505	0.819524	0.10721
A_43_P19847	9.19682	9.03685	8.94677	9.24487	9.16156	8.86445	8.54404	8.42388	8.36803	0.00268034	0.0270384	9.06015	8.44532	9.0903	0.126645	0.0899423	0.199971
A_43_P19891	1.40156	1.3888	1.39685	1.38588	1.36437	1.34417	2.60402	2.31829	1.94229	0.00165273	0.0217648	1.39574	2.2882	1.36481	0.0064524	0.331887	0.0208602
A_43_P19900	9.16704	9.2941	9.22265	8.88907	8.7508	8.9279	8.92843	8.89862	8.85202	0.00104081	0.0185142	9.22793	8.89302	8.85592	0.0636931	0.0385127	0.0930869
A_43_P19939	6.05534	6.22106	5.90015	5.5032	5.5483	5.70819	5.2869	4.99295	4.69746	0.00203117	0.0238324	6.05885	4.99244	5.58656	0.160485	0.294719	0.107719
A_43_P19944	1.35238	1.3417	1.339	1.33233	1.34208	1.48617	1.86296	1.74866	1.58644	0.00444372	0.0316092	1.34436	1.73269	1.38686	0.00707895	0.13895	0.0861435
A_43_P19969	1.55346	2.24188	1.52897	2.21198	2.93462	2.58099	3.32409	3.91401	4.85116	0.00628875	0.0363529	1.77477	4.02975	2.57587	0.404715	0.770088	0.361348
A_43_P20012	5.03659	4.76249	4.47797	7.21775	7.19007	7.37609	7.08047	6.9561	6.28028	0.000119663	0.00861147	4.75902	6.77229	7.26131	0.279325	0.430603	0.100368
A_43_P20056	5.83824	5.97734	5.86495	5.63157	5.54916	5.64944	5.48836	5.45993	5.63717	0.00252968	0.0263355	5.89351	5.52849	5.61006	0.0738165	0.0951913	0.0534914
A_43_P20126	5.01788	5.21474	5.29866	2.78086	3.22483	2.81631	1.75372	2.19529	1.66585	6.48021e-06	0.00281903	5.17709	1.87162	2.94067	0.144129	0.28373	0.246731
A_43_P20339	3.91993	4.08574	4.24703	3.88599	3.68061	3.97396	2.93119	3.38679	3.22615	0.00247541	0.0261308	4.08423	3.18137	3.84686	0.163551	0.231076	0.150539
A_43_P20533	5.53746	5.5147	5.38913	5.9048	6.18644	6.05954	5.65143	5.41948	5.84055	0.00979216	0.0430826	5.48043	5.63716	6.05026	0.079882	0.210899	0.14105
A_43_P20688	5.50832	5.39786	5.78157	5.89083	5.64191	6.20329	6.58221	6.80669	6.44168	0.00345634	0.0294697	5.56258	6.61019	5.91201	0.197529	0.184105	0.281289
A_43_P20702	5.53206	5.59756	5.78039	5.14107	5.31562	5.11067	4.98576	5.04888	4.74997	0.00182485	0.0226593	5.63667	4.9282	5.18912	0.128701	0.157549	0.110603
A_43_P20754	4.854	5.15895	4.62757	5.21073	5.23796	5.49409	5.62921	5.53372	5.54843	0.00950905	0.0426389	4.88018	5.57045	5.31426	0.266656	0.051416	0.156331
A_43_P21135	5.91791	5.99367	5.78506	6.62439	6.59902	6.34354	6.80027	6.60091	6.56625	0.000849587	0.0169239	5.89888	6.65581	6.52232	0.105597	0.126302	0.155342
A_43_P21147	1.99096	1.55752	1.62789	1.4898	1.84862	1.98939	2.97841	2.95865	2.8018	0.000671554	0.0149947	1.72546	2.91295	1.77594	0.232608	0.096765	0.257607
A_43_P21196	6.34106	6.28711	6.36038	6.51994	6.37206	6.31555	7.42829	7.15239	6.93099	0.00108768	0.0188401	6.32952	7.17056	6.40252	0.0379776	0.249147	0.105548
A_43_P21225	4.95146	5.00567	4.95185	4.35629	4.26075	4.53166	4.20377	3.96896	3.45599	0.00379981	0.0303606	4.96966	3.87624	4.3829	0.0311854	0.382413	0.137402
A_43_P21228	3.20332	3.70467	3.57751	3.62025	3.42518	3.20988	4.49854	5.17306	4.39387	0.00406388	0.0307359	3.49517	4.68849	3.41843	0.260623	0.422899	0.205267
A_43_P21313	6.49741	6.64392	6.77904	7.19307	6.98502	7.06082	7.45359	7.87539	8.48735	0.00654133	0.036879	6.64013	7.93878	7.07963	0.140855	0.519783	0.105296
A_43_P21317	6.64586	6.6248	6.319	7.39969	7.01228	6.95582	7.39386	7.33497	7.33586	0.00312626	0.0284174	6.52989	7.3549	7.1226	0.18294	0.0337454	0.241624
A_43_P21451	5.33321	5.33925	5.44514	5.32113	5.0589	5.0239	4.88168	4.82513	4.47606	0.00772421	0.0393309	5.37253	4.72763	5.13464	0.0629485	0.219687	0.162447
A_43_P21462	5.50343	5.64661	5.52807	5.72896	6.03762	5.88413	6.62053	6.08111	6.25622	0.00737078	0.0386607	5.55937	6.31928	5.88357	0.0765521	0.275185	0.154332
A_43_P21527	5.21561	6.09994	5.36075	5.24682	3.51968	5.19656	1.43493	2.99419	2.69939	0.00672517	0.0373315	5.55876	2.37617	4.65436	0.474256	0.828355	0.982979
A_43_P21564	8.3836	8.28134	8.10608	9.98775	9.87207	9.66007	9.65796	9.93216	9.27068	0.000297232	0.01175	8.25701	9.62027	9.83996	0.14035	0.332343	0.166183
A_43_P21615	7.9442	7.99015	7.97838	8.26147	8.15037	8.43751	7.99632	7.90418	7.89466	0.0059897	0.0356215	7.97091	7.93172	8.28312	0.0238681	0.0561498	0.144789
A_43_P21657	6.88279	8.07662	7.52977	5.30527	5.57802	5.81729	6.0209	6.73956	6.55308	0.00466346	0.0323236	7.49639	6.43785	5.56686	0.597614	0.372932	0.256192
A_43_P21799	7.99665	8.6693	8.56529	7.25707	7.45855	7.6491	7.70374	7.77022	7.48702	0.00808272	0.0399067	8.41041	7.65366	7.45491	0.362079	0.148093	0.196042
A_43_P21821	1.85022	1.66598	1.78534	3.13174	2.32307	2.75089	2.99149	2.78722	2.78299	0.0033058	0.0289209	1.76718	2.8539	2.73523	0.0934522	0.119177	0.404566
A_43_P21830	5.27122	5.61367	5.24735	5.5905	5.04162	5.64251	6.79527	6.81708	6.74856	0.0004086	0.0126911	5.37741	6.78697	5.42488	0.204952	0.0350071	0.332925
A_43_P21978	7.17625	7.2312	7.18067	7.15866	7.24496	7.32459	7.7772	7.74186	7.95544	0.000155516	0.00949599	7.19604	7.82483	7.24273	0.0305274	0.114486	0.0829865
A_43_P22042	6.03457	6.28773	6.36251	5.05609	4.70634	4.54581	6.13073	6.88986	6.4593	0.000631159	0.0145937	6.22827	6.49329	4.76941	0.171864	0.380708	0.260922
A_43_P22149	6.73364	6.67148	6.58928	7.12715	7.30941	7.11771	7.4035	7.25339	6.93016	0.00987542	0.0431977	6.6648	7.19568	7.18476	0.0724141	0.241892	0.108057
A_43_P22166	3.36073	2.8924	2.85018	2.88498	2.94949	3.19003	4.59017	4.20783	3.67328	0.00774079	0.039337	3.03444	4.15709	3.00817	0.283366	0.460545	0.160767
A_43_P22177	4.89562	5.08333	5.00422	5.08251	5.0768	5.32085	5.87303	5.98819	5.81651	0.000123645	0.00885039	4.99439	5.89258	5.16005	0.0942375	0.0874923	0.139282
A_43_P22274	2.95256	3.42179	3.10517	3.68915	4.0346	3.90545	5.86661	5.51862	4.43186	0.00391577	0.0305339	3.15984	5.27236	3.8764	0.239342	0.748404	0.174545
A_43_P22314	4.97169	4.76197	3.7885	4.70715	3.69977	4.90633	1.62881	2.10311	1.78472	0.00140537	0.0203724	4.50738	1.83888	4.43775	0.631344	0.241745	0.646821
A_43_P22368	4.59992	4.54174	3.91993	4.08712	3.77214	3.84429	5.62066	4.83348	5.48588	0.00600649	0.0356576	4.35386	5.31334	3.90118	0.376917	0.421	0.165021
A_43_P22402	3.63073	4.25589	4.03904	1.27465	2.44347	2.76687	2.0101	1.72264	2.37017	0.00671488	0.0373298	3.97522	2.0343	2.16166	0.317432	0.324444	0.785008
A_43_P22501	5.70586	5.8826	5.67764	6.05263	5.89543	5.93752	5.0737	5.2821	5.51251	0.0039968	0.0305832	5.75537	5.28944	5.96186	0.111088	0.219497	0.0813769
A_43_P22553	2.93694	5.01325	3.68938	1.31358	1.31213	1.29987	1.40487	1.90843	2.57433	0.00964887	0.0428693	3.87986	1.96254	1.30853	1.05118	0.586607	0.00753056
A_43_P22577	8.01966	8.95704	8.342	5.70278	6.02215	6.37127	6.54304	6.95819	6.57592	0.000471633	0.0133638	8.43957	6.69238	6.03207	0.476243	0.230783	0.334357
A_43_P22661	8.2215	8.23108	8.01946	7.70427	7.59007	7.88332	7.25339	6.71205	7.49324	0.00860031	0.0407827	8.15734	7.15289	7.72589	0.119511	0.400175	0.147814
A_43_P22732	3.40868	3.44338	3.464	2.8178	3.31634	3.13154	2.46705	2.82837	2.21558	0.00708877	0.0380392	3.43868	2.50367	3.08856	0.0279591	0.308028	0.252033
A_43_P22744	10.1063	9.93355	9.78548	9.02971	9.0353	9.13828	8.88557	8.40872	8.3776	0.000342063	0.012226	9.94177	8.5573	9.06776	0.16056	0.284722	0.0611319
A_43_P22750	7.67472	7.5531	7.65464	7.45155	7.45093	7.63274	7.15312	7.21775	7.05662	0.00105393	0.0185711	7.62749	7.14249	7.51174	0.065199	0.08109	0.104788
A_43_P22791	1.60776	1.90477	1.55898	2.73846	2.79832	2.86783	5.15308	4.3535	3.80163	0.000521598	0.0137026	1.6905	4.43607	2.80154	0.187154	0.679497	0.0647444
A_43_P22811	6.91526	7.33755	6.99722	5.45184	5.21883	5.41517	5.0409	5.44861	5.80122	0.000325786	0.0120401	7.08334	5.43024	5.36195	0.223928	0.380495	0.125295
A_43_P22864	5.93479	6.59462	6.25408	4.89562	4.47164	5.1006	5.06751	5.20535	5.16148	0.00142393	0.0204567	6.26116	5.14478	4.82262	0.329968	0.0704229	0.320773
A_43_P22977	8.96005	8.86939	8.91033	9.05032	9.02491	8.99015	9.35034	9.40029	9.28617	6.17588e-05	0.00689487	8.91326	9.3456	9.02179	0.0454019	0.0572066	0.0302044
A_43_P23092	11.7323	11.9293	11.5781	12.1025	12.3042	12.2404	12.0022	12.0321	12.0555	0.00821796	0.0401636	11.7466	12.0299	12.2157	0.176035	0.0267144	0.103077
A_43_P23108	6.7976	6.72028	6.91555	6.48552	6.32948	6.59085	6.47816	6.30453	6.19618	0.00825413	0.0401902	6.81114	6.32629	6.46862	0.0983327	0.142241	0.131502
A_43_P23278	5.83843	5.24242	5.67401	5.78506	5.97904	5.94676	7.06948	6.68091	6.85566	0.000903131	0.0174062	5.58495	6.86868	5.90362	0.307824	0.19461	0.103934
A_43_P23288	6.86088	6.66579	6.74362	6.10461	6.27517	5.93147	5.93316	4.83501	5.23768	0.00646938	0.0367328	6.75676	5.33528	6.10375	0.0982068	0.555542	0.171852
A_43_P23310	4.63441	4.62725	4.45194	5.54728	5.21503	5.25646	5.17723	5.24633	5.54359	0.00188265	0.0230414	4.5712	5.32238	5.33959	0.103345	0.194661	0.181054
A_43_P23354	5.84255	5.41463	5.88803	4.82561	5.50392	4.98047	4.38553	3.77539	4.45194	0.00421041	0.0312284	5.71507	4.20429	5.10333	0.261179	0.372913	0.355456
A_43_P23361	8.11211	8.2196	8.13106	9.87904	9.62659	9.86095	9.78694	9.86618	9.71258	1.24139e-06	0.0015476	8.15426	9.78857	9.78886	0.0573774	0.0768144	0.14082
A_43_P23463	9.13179	9.5153	9.04069	8.00085	7.99607	7.983	8.19948	8.96428	8.46763	0.00386467	0.0304934	9.22926	8.5438	7.9933	0.25187	0.388051	0.00924274
A_44_P1000653	17.2607	17.2756	17.2905	17.4061	17.612	17.351	17.612	17.6585	17.672	0.00429525	0.0314061	17.2756	17.6475	17.4563	0.014916	0.0314807	0.137554
A_44_P1000875	13.5546	13.9203	13.5583	13.2647	13.2764	13.4236	13.1494	13.2255	13.1611	0.00966233	0.0428769	13.6777	13.1786	13.3216	0.210034	0.0409649	0.0885784
A_44_P100113	1.74866	1.62821	1.65351	1.62789	1.54591	1.57441	1.49697	1.49751	1.50278	0.0075127	0.0388144	1.6768	1.49908	1.58274	0.0635076	0.00321265	0.0416156
A_44_P100139	8.14385	8.34541	8.14385	7.9612	8.70009	8.01236	9.15282	9.07561	8.95364	0.00984999	0.0431749	8.21104	9.06069	8.22455	0.116371	0.100425	0.412626
A_44_P100185	3.79331	3.06541	2.87468	3.18308	2.76056	2.71506	1.4124	1.4233	1.41475	0.000907654	0.0174083	3.24447	1.41682	2.88623	0.484783	0.00573992	0.258083
A_44_P100197	6.93783	6.79819	6.77288	6.41687	6.36516	6.71679	6.31606	5.97127	5.99164	0.00438809	0.0315302	6.8363	6.09299	6.49961	0.0888343	0.193452	0.189858
A_44_P1002173	8.90911	8.97619	8.97164	8.67875	8.6293	8.6357	8.7285	8.84264	8.81107	0.000414526	0.0127076	8.95231	8.79407	8.64792	0.0374855	0.0589361	0.0268909
A_44_P1002320	12.7192	12.7243	12.4766	12.0371	11.9273	12.0765	11.8501	11.684	11.7037	0.00013603	0.00907573	12.6401	11.7459	12.0136	0.14155	0.090749	0.0773491
A_44_P1002360	11.9078	11.9026	11.9191	10.7985	11.2779	11.3454	10.3585	10.3722	10.7236	0.000502128	0.0135271	11.9098	10.4848	11.1406	0.0084293	0.206939	0.298153
A_44_P100310	1.54696	1.48827	1.56927	1.50068	1.51768	1.53296	1.44218	1.41742	1.3925	0.00576459	0.0350562	1.53484	1.41737	1.51711	0.0418412	0.0248408	0.0161431
A_44_P1003602	9.81696	11.392	11.2105	7.75065	8.2636	8.5985	10.013	10.9256	10.6147	0.00390032	0.0305113	10.8065	10.5178	8.20425	0.861765	0.463996	0.427027
A_44_P1003716	6.63443	7.36842	7.32202	5.56399	5.22461	5.86582	5.60705	6.44107	6.41652	0.00951943	0.0426494	7.10829	6.15488	5.55147	0.411031	0.474592	0.320788
A_44_P1003728	6.02862	5.20196	5.53852	6.45014	6.71503	6.87455	6.54431	6.37206	6.21338	0.00871817	0.0410009	5.5897	6.37658	6.6799	0.415701	0.165513	0.214374
A_44_P1003917	6.16644	6.7141	6.53346	5.30366	5.5931	5.45755	5.67568	5.79257	6.15769	0.00497116	0.0330067	6.47133	5.87531	5.45144	0.279067	0.251434	0.144817
A_44_P1004282	8.37634	7.97838	8.07632	8.79101	8.71998	8.82772	8.8551	8.76105	8.51772	0.00514916	0.0336235	8.14368	8.71129	8.77957	0.207357	0.174104	0.0547731
A_44_P1005213	5.28814	5.77717	5.62485	1.53746	4.11083	1.56655	1.88537	1.79149	1.99953	0.00408446	0.0308137	5.56339	1.89213	2.40494	0.250239	0.104183	1.47741
A_44_P1005229	1.66466	1.61732	1.6099	1.53544	1.51296	1.52093	1.46634	1.45979	1.50511	0.000505289	0.0135271	1.63063	1.47708	1.52311	0.0297037	0.0244926	0.0113969
A_44_P1005540	9.96116	9.805	9.8158	9.80118	9.78745	9.81189	9.6128	9.38843	9.35237	0.00400467	0.0305832	9.86066	9.4512	9.80017	0.0872084	0.141104	0.0122521
A_44_P100591	1.74963	1.58777	1.7284	1.59844	1.58824	1.62414	1.50101	1.47985	1.44079	0.00854368	0.0406661	1.6886	1.47388	1.60361	0.0879662	0.0305502	0.0184997
A_44_P1005988	7.27314	7.06146	7.08261	7.13219	7.54863	7.28877	6.80296	6.46968	6.54874	0.00538538	0.0344038	7.13907	6.60713	7.3232	0.11659	0.17414	0.210344
A_44_P100659	5.40359	4.87245	5.02033	6.01234	6.09703	5.63606	6.18186	6.0627	5.92691	0.00401295	0.0305832	5.09879	6.05716	5.91515	0.274123	0.127565	0.245379
A_44_P1007008	10.7174	11.416	11.2042	9.60422	10.0894	10.0368	10.3032	10.3517	9.95003	0.00519966	0.0337763	11.1125	10.2016	9.91017	0.358227	0.219261	0.266261
A_44_P100765	1.85972	1.67372	1.795	1.66907	1.6214	1.72611	1.53495	1.51635	1.47448	0.00662863	0.0370846	1.77615	1.50859	1.67219	0.094426	0.0309714	0.0524233
A_44_P1007729	9.17714	9.11805	8.98365	8.75684	8.68403	8.97164	8.43667	8.56829	8.68781	0.00641293	0.0366034	9.09295	8.56426	8.80417	0.0991572	0.125619	0.149529
A_44_P1007841	4.14259	3.98647	3.507	1.42303	1.39941	1.37413	2.46117	2.68613	1.71074	0.000383709	0.0124518	3.87868	2.28601	1.39885	0.33122	0.510743	0.0244535
A_44_P1007965	6.10718	6.12522	5.95903	7.51318	6.9785	7.23252	7.20543	7.59556	7.75641	0.000552804	0.013883	6.06381	7.51913	7.2414	0.0911907	0.283331	0.267454
A_44_P1008591	10.8923	10.7629	10.7217	9.7674	10.1395	10.6183	9.71858	9.84049	9.72644	0.00733191	0.0385916	10.7923	9.76184	10.1751	0.0890184	0.0682257	0.426564
A_44_P100873	5.63177	5.33084	5.35255	6.40606	6.16624	6.03565	5.99592	5.87654	6.23286	0.00457389	0.0320385	5.43839	6.03511	6.20265	0.167828	0.181364	0.187875
A_44_P1008751	5.85043	5.96246	5.93722	6.1592	6.31461	6.14769	6.52261	6.88037	6.76785	0.000580713	0.0142185	5.9167	6.72361	6.20716	0.0587642	0.182938	0.0932282
A_44_P1009001	10.861	11.0648	10.8755	10.4058	10.4837	10.4687	10.5736	10.5933	10.2639	0.00595298	0.0355095	10.9338	10.4769	10.4527	0.113711	0.184765	0.0413204
A_44_P1010260	4.71784	4.78771	4.98883	3.31823	3.16571	2.48627	1.22256	1.21333	1.24878	1.02573e-05	0.00340502	4.83146	1.22822	2.99007	0.140694	0.0183909	0.442915
A_44_P1010553	8.50457	8.52565	8.38667	8.97662	8.94263	8.82879	8.96299	8.94454	9.08102	0.000297484	0.01175	8.4723	8.99619	8.91602	0.0749005	0.0740477	0.0774248
A_44_P1010631	9.33073	9.33113	9.39358	9.57617	9.58843	9.5445	9.58208	9.46107	9.47136	0.00299381	0.0278702	9.35181	9.50484	9.5697	0.0361681	0.0670909	0.0226691
A_44_P1010816	3.86462	4.30304	4.84511	1.25883	1.81959	1.339	1.68847	1.40859	1.19677	9.21883e-05	0.00795467	4.33759	1.43127	1.47247	0.491157	0.246634	0.303276
A_44_P1011038	13.7249	13.7249	13.5523	13.2051	13.3448	12.9208	12.918	13.0568	12.6743	0.00451227	0.0317573	13.6674	12.883	13.1569	0.0996489	0.193658	0.216033
A_44_P1011147	7.88112	7.83957	7.87902	8.09672	8.19068	8.07522	8.22846	8.11475	8.36661	0.00397111	0.0305811	7.86657	8.23661	8.12087	0.0234053	0.126127	0.0614008
A_44_P1011464	12.0926	12.2501	12.0249	12.2525	12.1982	11.7534	10.2656	11.0997	10.8643	0.00219135	0.0246924	12.1225	10.7432	12.068	0.115533	0.430015	0.273823
A_44_P1011855	10.8883	10.8179	10.7929	10.7654	10.7292	10.7609	10.9749	10.9361	10.9731	0.000730428	0.0156641	10.833	10.9614	10.7518	0.0494655	0.0218812	0.019697
A_44_P1012017	1.80953	1.69514	1.69925	1.66322	1.56142	1.58777	1.51363	1.50839	1.52597	0.0043518	0.0314203	1.73464	1.516	1.60414	0.064885	0.00902557	0.0528372
A_44_P1012556	12.5633	12.4595	12.691	12.3726	12.4965	12.636	12.2476	12.0937	11.9521	0.00948934	0.0425924	12.5713	12.0978	12.5017	0.115975	0.147793	0.131782
A_44_P1012567	6.65392	6.81015	6.67643	7.29153	7.13967	7.33975	7.56185	7.55442	7.23996	0.00117204	0.0190584	6.7135	7.45207	7.25698	0.0844561	0.183737	0.104418
A_44_P1012711	7.50037	7.37119	7.35655	6.72191	6.64095	6.8941	7.04335	6.56471	6.58381	0.0056031	0.0346544	7.40937	6.73062	6.75232	0.0791468	0.270998	0.129285
A_44_P1013006	4.82951	4.79867	5.0677	4.12798	4.10766	4.69205	3.94385	3.86221	4.08243	0.00551302	0.0345227	4.89863	3.96283	4.30923	0.147229	0.111331	0.331687
A_44_P1013048	8.13954	8.19171	8.2642	8.14282	7.95822	8.0642	7.85871	7.9276	7.87422	0.0040248	0.0306106	8.19848	7.88684	8.05508	0.062606	0.0361398	0.0926362
A_44_P1013157	7.63485	7.77022	7.66018	7.93289	7.71141	7.77637	8.10733	7.97875	8.2016	0.00671914	0.0373315	7.68841	8.09589	7.80689	0.0719676	0.111865	0.113852
A_44_P1013314	14.0581	15.8755	15.5809	10.7322	11.631	12.0397	12.5016	12.0874	11.6469	0.00164026	0.0216657	15.1715	12.0786	11.4676	0.975414	0.427407	0.668899
A_44_P1013330	3.82849	4.53238	4.02519	1.812	2.62584	1.64298	2.65767	3.99315	3.40212	0.00820493	0.0401518	4.12869	3.35098	2.02694	0.363178	0.669208	0.525502
A_44_P1013385	8.54441	8.6142	8.28303	8.92752	9.06204	9.13695	9.29481	8.91684	9.08193	0.00599342	0.0356215	8.48055	9.09786	9.04217	0.174576	0.189484	0.10612
A_44_P101370	3.8829	3.77654	3.45801	1.24573	1.24301	2.38709	2.78052	3.83035	3.35543	0.00503217	0.0332367	3.70582	3.3221	1.62528	0.221096	0.525709	0.659749
A_44_P1013713	5.78243	5.73061	5.60327	5.37043	5.62066	5.40892	5.92646	5.83443	5.9516	0.00532692	0.0342476	5.70544	5.90417	5.46667	0.0921935	0.0616874	0.134743
A_44_P1014388	7.25105	7.09576	7.0431	6.26218	6.37152	6.48676	6.13566	6.17697	5.84781	0.000195162	0.0101025	7.12997	6.05348	6.37348	0.108111	0.179306	0.112303
A_44_P1014818	8.01683	7.9768	7.94584	7.79265	7.74489	7.75293	7.72411	7.56257	7.55567	0.000938032	0.0176293	7.97982	7.61412	7.76349	0.035595	0.0953174	0.0255685
A_44_P1016061	8.69206	8.24154	8.32095	7.87749	7.76295	7.88641	7.65508	7.96277	7.91139	0.00969003	0.0429226	8.41818	7.84308	7.84228	0.240486	0.164829	0.0688484
A_44_P101644	2.16426	1.93995	1.9538	1.8918	1.80226	1.73613	1.51908	1.51068	1.46515	0.000980259	0.0179038	2.01934	1.4983	1.81007	0.125697	0.0290209	0.0781286
A_44_P101700	3.1284	3.6572	3.23613	2.44817	2.08901	2.37287	2.85885	3.53645	3.35344	0.00719916	0.0382184	3.34058	3.24958	2.30335	0.279444	0.350537	0.189404
A_44_P1017000	1.63575	1.60124	1.58709	1.49736	1.49007	1.49388	1.44785	1.44559	1.48458	0.000195026	0.0101025	1.60803	1.45934	1.49377	0.0250304	0.0218865	0.00365027
A_44_P1017144	1.3774	1.4029	1.38805	1.3498	1.34993	1.35396	1.32556	1.31818	1.33514	0.000402146	0.0125999	1.38945	1.32629	1.35123	0.0128103	0.00850121	0.00236223
A_44_P1017315	10.3566	10.3842	10.3346	10.09	9.97718	9.99547	10.1719	10.0748	10.1815	0.000539578	0.0137984	10.3585	10.1427	10.0209	0.0248595	0.0590161	0.0605678
A_44_P101779	3.51042	3.04693	3.07836	3.04842	3.77697	3.33446	2.0539	1.85734	2.43707	0.00480191	0.0327124	3.2119	2.1161	3.38662	0.258998	0.294833	0.367068
A_44_P1017996	1.77574	1.64553	1.67255	1.64227	1.68265	1.5901	1.50539	1.50626	1.50591	0.0070371	0.0379208	1.69794	1.50585	1.63834	0.0687151	0.000437836	0.0464019
A_44_P1018090	1.3464	1.29935	1.32523	1.29149	1.30394	1.29485	1.7029	1.63575	1.56071	0.000134242	0.00904623	1.32366	1.63312	1.29676	0.0235646	0.0711322	0.00644001
A_44_P1018696	1.54915	1.49308	1.53799	1.50314	1.4884	1.51682	1.43794	1.42995	1.42674	0.00228549	0.0251154	1.52674	1.43154	1.50279	0.0296776	0.00576948	0.0142092
A_44_P1019245	8.70965	8.31409	8.43625	9.72498	9.73129	9.44149	9.52652	9.49717	9.68192	0.000207553	0.0104194	8.48666	9.56853	9.63258	0.202545	0.0992833	0.165523
A_44_P1019604	6.27494	7.67079	7.4892	4.0343	3.82706	4.69175	4.02646	3.66461	4.46824	0.000807649	0.0165513	7.14497	4.05311	4.18437	0.758926	0.402477	0.451458
A_44_P1019710	7.39744	7.59168	7.49925	7.74971	7.89244	7.93184	8.18124	8.97805	8.72385	0.00374914	0.0303318	7.49613	8.62771	7.858	0.0971575	0.407012	0.0958224
A_44_P1019923	10.0894	10.2796	10.1348	9.66183	9.58449	9.46065	9.86095	9.87275	9.71601	0.000797965	0.0165166	10.1679	9.81657	9.56899	0.099325	0.0872847	0.101481
A_44_P1020608	11.1898	11.9435	11.6543	9.43086	9.95294	10.0882	10.2772	10.2538	9.88365	0.00114969	0.0190044	11.5959	10.1382	9.82401	0.380191	0.220769	0.34713
A_44_P1020615	10.2555	11.1616	11.3866	9.04597	9.14894	9.18301	9.25718	9.21798	9.1089	0.00115567	0.0190044	10.9346	9.19468	9.12597	0.598758	0.0768346	0.0713483
A_44_P1020708	15.2033	15.0809	15.1117	15.3419	15.2977	15.2937	15.2326	15.2421	15.3115	0.00859522	0.0407816	15.132	15.2621	15.3111	0.0636698	0.0430689	0.0267604
A_44_P1021381	12.9918	13.0004	13.1039	12.5668	12.8086	12.7219	12.7547	12.7938	12.8033	0.00571801	0.0348864	13.032	12.784	12.6991	0.0623467	0.0257437	0.122489
A_44_P1021489	6.48552	6.41326	6.27149	6.02382	5.55043	5.99048	5.09654	5.40086	5.34971	0.00116364	0.0190044	6.39009	5.28237	5.85491	0.108879	0.162949	0.264214
A_44_P102168	1.54569	1.47039	1.51616	1.46292	1.45349	1.66111	1.81943	2.09942	1.92419	0.00410977	0.0309449	1.51074	1.94768	1.52584	0.0379425	0.141465	0.117246
A_44_P1021866	8.21308	8.26646	8.37438	8.55178	8.70413	8.6639	8.67961	8.46169	8.59997	0.00664026	0.0370854	8.28464	8.58043	8.63994	0.082173	0.110267	0.0789522
A_44_P102197	5.2398	5.46697	5.54272	5.29107	5.23258	5.13915	5.77866	6.08772	6.13612	0.00179441	0.0224639	5.4165	6.00083	5.22094	0.157642	0.193924	0.0766255
A_44_P1022002	4.07492	4.52871	4.31776	3.68032	3.44053	3.27023	3.9446	3.59065	3.8855	0.00730941	0.0385727	4.30713	3.80691	3.46369	0.227084	0.18961	0.206022
A_44_P102319	1.78157	1.65309	1.67642	1.64777	1.55565	1.58976	1.50658	1.50715	1.51007	0.00710889	0.0380403	1.7037	1.50793	1.59772	0.0684466	0.00187671	0.0465762
A_44_P1023264	15.0534	14.8583	14.9255	14.4056	14.4188	14.294	14.0864	13.766	13.7463	0.000166812	0.00956133	14.9458	13.8662	14.3728	0.0991132	0.190937	0.0685452
A_44_P1023515	7.65641	7.80621	7.79348	8.3635	8.20132	8.0899	8.37996	8.30075	8.24055	0.001102	0.0189033	7.75203	8.30709	8.21824	0.0830579	0.069919	0.137584
A_44_P1023801	5.23029	6.17795	6.2949	4.09578	4.55209	4.43559	4.73731	4.68817	4.92658	0.00569769	0.0348747	5.90105	4.78402	4.36115	0.583826	0.125886	0.237086
A_44_P1024113	8.54481	8.59424	8.58642	8.80891	8.73734	8.90652	8.97448	8.80984	8.7996	0.00771086	0.0393081	8.57516	8.86131	8.81759	0.0265698	0.0981443	0.0849222
A_44_P1024773	6.12774	5.8884	5.79998	4.2515	4.27446	3.3405	4.04641	4.09499	3.70514	0.000573918	0.014168	5.93871	3.94884	3.95549	0.169571	0.21245	0.53272
A_44_P1025013	9.5435	9.53428	9.39494	9.99075	10.1555	10.3068	10.4594	10.5074	10.2229	0.000461363	0.0132783	9.49091	10.3966	10.151	0.083239	0.152291	0.158097
A_44_P102523	6.14337	8.2702	7.83731	4.79119	4.4554	4.69134	3.94651	4.50553	4.1382	0.00224054	0.0249394	7.41696	4.19675	4.64597	1.124	0.284073	0.172426
A_44_P1025349	10.8982	11.7669	11.8862	9.34833	9.66443	9.95544	10.4588	10.3151	10.013	0.00266194	0.0269143	11.5171	10.2623	9.65607	0.539305	0.227557	0.303641
A_44_P1025454	12.7547	12.3715	12.3404	12.154	12.008	11.9877	11.7414	11.696	11.8479	0.00297492	0.0278329	12.4889	11.7618	12.0499	0.230757	0.0779704	0.0907355
A_44_P102557	4.05274	3.85319	4.31383	1.30791	1.2944	1.29176	1.89537	1.74829	2.24657	6.37439e-06	0.00281903	4.07325	1.96341	1.29802	0.231005	0.256014	0.00865952
A_44_P102570	5.57356	5.47974	5.42377	5.65279	5.43024	5.69878	6.44044	6.32302	6.28803	0.000105654	0.00825445	5.49236	6.3505	5.59394	0.0756835	0.0798316	0.143618
A_44_P102588	7.17941	7.68834	7.70182	9.32573	9.25289	9.30866	8.4496	9.23103	9.51814	0.00192331	0.0232978	7.52319	9.06626	9.29576	0.297797	0.552997	0.0380929
A_44_P1027493	4.98762	4.94301	4.97603	4.71023	5.11978	4.8289	4.07836	4.11137	4.49991	0.00480964	0.0327305	4.96889	4.22988	4.88631	0.0231465	0.234434	0.210722
A_44_P1028132	10.5537	10.4143	10.326	12.1982	12.0834	11.8579	11.7005	11.881	12.303	0.00014896	0.00934068	10.4313	11.9615	12.0465	0.114797	0.309202	0.173128
A_44_P1028196	10.5718	11.746	11.9466	9.11489	9.23205	9.62416	10.0148	10.9108	10.6572	0.0081132	0.0399649	11.4215	10.5276	9.3237	0.742674	0.461845	0.266719
A_44_P1029654	8.49426	8.44317	8.216	8.20729	8.17564	8.30075	7.8418	7.87571	7.82442	0.00115661	0.0190044	8.38448	7.84731	8.22789	0.148121	0.0260834	0.0650522
A_44_P1029706	3.9879	3.96605	4.10163	2.14716	2.28324	1.21697	1.7634	1.94958	1.95109	0.000375131	0.0124518	4.01853	1.88802	1.88246	0.0727948	0.107926	0.580328
A_44_P1029770	7.16871	7.24788	7.17355	7.81363	8.04606	7.62017	7.61795	7.39321	7.37693	0.00577451	0.0350808	7.19671	7.46269	7.82662	0.0443772	0.134698	0.213243
A_44_P1030098	8.33888	8.41084	8.29489	6.39731	6.62603	6.85079	6.63557	6.49801	6.4184	8.85643e-06	0.00315458	8.3482	6.51733	6.62471	0.0585331	0.109865	0.226744
A_44_P103028	15.7723	15.6317	15.6786	15.9214	16.0343	16.0636	16.0065	15.9999	15.915	0.00226662	0.0250618	15.6942	15.9738	16.0065	0.0716224	0.0509872	0.0750642
A_44_P1030669	9.35064	9.32479	9.44963	8.93317	8.83297	8.73156	8.9412	8.95208	8.79228	0.000481911	0.0135007	9.37502	8.89518	8.83257	0.065894	0.0892878	0.100808
A_44_P1030897	14.602	14.7694	14.7694	14.7349	14.683	14.7529	14.9873	14.9496	14.9925	0.00299191	0.0278702	14.7136	14.9765	14.7236	0.096634	0.0234338	0.0362887
A_44_P1031094	5.91329	5.80516	5.68083	6.1884	6.01851	6.1474	6.34744	6.35675	6.8318	0.00854141	0.0406661	5.79976	6.512	6.1181	0.116325	0.277	0.0886536
A_44_P1031457	5.79028	5.77452	6.14188	6.01685	5.76999	6.02564	6.76785	6.87096	6.59228	0.0013332	0.0199847	5.90223	6.7437	5.93749	0.207695	0.1409	0.145129
A_44_P1032161	7.56061	6.86334	6.77328	6.08544	6.21354	6.27199	6.01915	6.01851	5.34055	0.00991421	0.0432788	7.06574	5.79274	6.19032	0.430924	0.391604	0.0954211
A_44_P103225	2.70503	3.23198	3.32988	1.32566	1.33394	2.03664	1.34704	1.77591	1.29163	0.00190221	0.023158	3.08896	1.47153	1.56541	0.336077	0.265055	0.408115
A_44_P1032709	2.2782	1.99268	2.09071	1.84614	1.76654	1.88813	1.61909	1.54167	1.52897	0.00114696	0.0190044	2.12053	1.56324	1.8336	0.145079	0.0487752	0.0617562
A_44_P103278	9.76161	9.59975	9.85821	9.47057	9.42116	9.51042	9.40874	9.22113	9.21244	0.00440555	0.0315949	9.73986	9.28077	9.46739	0.130595	0.11091	0.0447137
A_44_P1033359	7.93254	7.89652	8.05608	7.68752	7.63418	7.54335	7.84396	7.97179	7.96846	0.00294683	0.0277881	7.96172	7.92807	7.62168	0.0836863	0.0728645	0.0728894
A_44_P1033819	8.96616	8.94012	8.9754	9.14967	9.20339	9.13925	9.06519	8.93163	9.02371	0.00361624	0.0298366	8.96056	9.00684	9.1641	0.0182926	0.0683603	0.0344212
A_44_P103394	1.52139	1.84445	1.50375	1.92055	1.46877	2.17427	4.3531	3.68938	3.09474	0.00194049	0.0233426	1.6232	3.71241	1.85453	0.191817	0.629495	0.357353
A_44_P1034223	1.67056	1.72722	1.62233	1.5641	1.53633	1.57973	1.47996	1.47661	1.4545	0.000985312	0.0179104	1.67337	1.47035	1.56005	0.0525034	0.0138319	0.0219845
A_44_P1034375	9.77057	9.77725	9.73294	9.49124	9.57343	9.39741	9.25158	9.30716	9.50058	0.00444543	0.0316092	9.76026	9.35311	9.48736	0.0238873	0.130706	0.0880696
A_44_P1035058	6.84628	7.2717	7.01171	6.06668	6.44	6.41472	6.96895	7.32734	7.57513	0.0067033	0.0373209	7.04323	7.29047	6.30713	0.214452	0.304769	0.208623
A_44_P1035190	6.71788	7.22803	7.07665	5.59213	5.25438	5.6225	4.98776	4.89061	5.07889	4.16029e-05	0.00576278	7.00752	4.98575	5.48967	0.262007	0.0941542	0.204333
A_44_P1035294	1.86947	1.73869	1.89443	1.6363	1.6492	1.52578	1.49001	1.42413	1.43416	0.00107984	0.018806	1.8342	1.44944	1.60376	0.0836482	0.0354976	0.067836
A_44_P1035387	2.99892	2.47997	2.6803	1.77893	1.99825	1.43253	1.3982	1.38817	1.55056	0.00118243	0.0191856	2.71973	1.44564	1.73657	0.261712	0.0909969	0.285231
A_44_P1035872	8.36957	8.52184	8.38127	8.41541	8.30585	8.45561	8.0875	8.12657	8.1618	0.00356174	0.029701	8.42422	8.12529	8.39229	0.0847388	0.0371668	0.0775109
A_44_P1035926	8.01279	7.94097	8.10572	7.78611	8.0401	7.74743	7.63849	7.48607	7.53891	0.00636872	0.0365459	8.01983	7.55449	7.85788	0.0825975	0.0773956	0.158991
A_44_P1036430	9.64284	9.63511	9.60611	9.6889	9.751	9.70247	9.81489	9.78212	9.9242	0.00485115	0.0328482	9.62802	9.8404	9.71412	0.0193641	0.0744	0.0326494
A_44_P1036685	13.2941	13.232	13.2736	13.5433	13.5142	13.4049	13.4262	13.321	13.3433	0.00844333	0.0405629	13.2666	13.3635	13.4875	0.0316772	0.0554251	0.0729936
A_44_P103692	6.85031	6.91646	6.7286	7.17653	7.01098	7.11155	7.31438	7.238	7.13415	0.00444885	0.0316175	6.83179	7.22884	7.09969	0.0952909	0.0904653	0.0834108
A_44_P1037410	4.00212	3.8065	3.94571	4.25493	4.21774	4.27828	3.19807	3.65161	3.74323	0.00781855	0.039445	3.91811	3.53097	4.25031	0.100685	0.291921	0.030534
A_44_P1037953	7.16124	6.71601	6.96346	6.2454	6.46673	6.02266	5.79397	6.05458	5.71294	0.00193225	0.0233342	6.9469	5.85383	6.24493	0.223077	0.178515	0.222032
A_44_P1038028	7.24179	7.21301	7.63142	8.87448	8.09738	7.83833	8.84357	9.33073	9.46107	0.00334522	0.0290814	7.36207	9.21179	8.27006	0.233707	0.32548	0.539225
A_44_P103832	12.3201	12.192	12.0682	11.9142	11.9191	11.9302	11.846	11.6072	11.5233	0.00493111	0.0330067	12.1934	11.6588	11.9211	0.125956	0.167436	0.00820063
A_44_P1038655	7.51889	7.38516	7.69434	6.73364	6.77353	6.53448	6.93045	7.05734	6.72793	0.00112968	0.0190044	7.5328	6.90524	6.68055	0.155055	0.166147	0.128063
A_44_P1038716	1.62104	1.52646	1.59153	1.54023	1.52351	1.56164	1.46695	1.46269	1.44443	0.00763351	0.0391355	1.57968	1.45802	1.54179	0.0483926	0.0119645	0.019115
A_44_P1039128	10.6263	11.2976	10.9005	7.39129	8.01345	8.17539	8.27577	10.4155	9.33192	0.00466951	0.0323236	10.9414	9.34105	7.86004	0.337483	1.06987	0.413949
A_44_P1039606	5.17429	6.17853	5.84448	1.71058	3.09244	2.71979	1.43073	1.76873	3.41364	0.00286259	0.0275575	5.73243	2.20436	2.5076	0.511413	1.06081	0.714947
A_44_P1039994	13.3097	15.0683	14.9198	11.0973	11.3249	11.9534	12.279	12.4895	11.7392	0.00351519	0.0295667	14.4326	12.1692	11.4585	0.97533	0.386976	0.443393
A_44_P1040503	10.0364	9.90319	9.7598	10.3854	10.3669	10.3898	10.2424	10.4812	10.5638	0.00372778	0.030292	9.89979	10.4292	10.3807	0.138319	0.166939	0.0121623
A_44_P1040511	3.74255	3.99243	3.79825	3.86099	3.87628	4.13972	2.93808	3.36491	2.99099	0.00207623	0.0240641	3.84441	3.09799	3.959	0.13118	0.232668	0.156695
A_44_P1040889	8.52736	8.45198	8.42029	8.79661	8.84571	8.80642	8.72759	8.62419	8.72432	0.000351009	0.0122701	8.46655	8.69203	8.81625	0.0550028	0.0587798	0.0259841
A_44_P1041495	9.233	8.87633	8.92194	9.34456	9.47448	9.3116	9.47604	9.64437	9.54584	0.00623604	0.0362028	9.01042	9.55541	9.37688	0.194099	0.0845736	0.0861183
A_44_P1042372	7.43506	8.20712	8.50457	5.30745	5.49746	5.67065	5.12305	5.39395	5.46722	0.000127941	0.0089439	8.04892	5.32808	5.49185	0.552024	0.181297	0.181663
A_44_P1042668	7.72987	7.61611	7.54889	7.36113	7.88899	7.5296	7.07591	6.8941	6.84171	0.00525544	0.0340058	7.63162	6.93724	7.59324	0.0914813	0.122917	0.269623
A_44_P1042711	7.29885	7.91423	7.99015	4.53583	4.25369	5.30974	4.39509	4.20734	4.58009	8.86506e-05	0.00786263	7.73441	4.39417	4.69975	0.379114	0.186374	0.546776
A_44_P1042783	8.17048	7.77445	7.60623	7.1844	7.1377	6.80473	7.22888	7.40753	7.19129	0.0096167	0.0427917	7.85039	7.2759	7.04228	0.289685	0.115534	0.20704
A_44_P104295	4.19264	4.44735	4.18338	3.19463	2.69043	3.43224	4.44038	5.17516	4.40469	0.00346555	0.02947	4.27446	4.67341	3.10577	0.149804	0.434896	0.378804
A_44_P1043576	9.13147	9.11091	9.25418	8.76046	8.77381	8.8702	8.88824	8.65144	8.749	0.00264162	0.0268446	9.16552	8.76289	8.80149	0.0774704	0.119009	0.0598784
A_44_P1043943	4.55209	5.13649	5.39877	6.71987	6.08173	6.48876	6.32517	7.08748	7.14393	0.00372702	0.030292	5.02911	6.85219	6.43012	0.433433	0.457284	0.323085
A_44_P1045105	11.7102	11.4297	11.6854	10.8654	10.6363	10.7756	10.7398	10.4808	11.1423	0.00540204	0.0344038	11.6084	10.7876	10.7591	0.155303	0.3333	0.115415
A_44_P104578	1.6026	1.52067	1.58008	1.96202	1.51568	1.54864	2.08579	2.12561	2.18232	0.00769023	0.0393081	1.56778	2.13124	1.67545	0.0423263	0.04851	0.248725
A_44_P1045820	5.24188	4.5152	4.87491	6.13377	6.50611	6.43489	5.88747	6.22497	5.58157	0.0025976	0.0265619	4.87733	5.898	6.35826	0.363345	0.321832	0.197644
A_44_P104616	1.40431	2.42861	2.139	4.08629	3.3218	3.78508	3.0388	2.85595	3.16642	0.00443067	0.0316092	1.99064	3.02039	3.73106	0.528018	0.156052	0.3851
A_44_P104652	9.76484	10.3684	10.0144	11.9799	11.4114	10.9661	11.348	11.6231	12.1719	0.00578115	0.0350856	10.0492	11.7143	11.4525	0.303268	0.41945	0.508119
A_44_P104687	3.18181	3.28354	3.49196	3.6448	3.5653	3.50892	1.49163	1.9207	2.05478	7.1394e-05	0.00731544	3.3191	1.82237	3.57301	0.158108	0.29417	0.0682647
A_44_P1047158	8.50761	8.74252	8.55933	7.86621	8.0222	8.018	8.09103	8.34934	8.26007	0.00160081	0.0213886	8.60315	8.23348	7.9688	0.123438	0.131194	0.0888718
A_44_P1047259	9.33388	9.56069	9.28857	9.81696	9.5984	9.49538	9.95544	10.0007	10.042	0.00355596	0.0296859	9.39438	9.99939	9.63691	0.145799	0.043297	0.164211
A_44_P1047924	14.2577	14.1767	14.1375	14.1623	14.1354	14.0667	13.6285	13.6928	13.6401	2.18927e-05	0.00459137	14.1906	13.6538	14.1215	0.0612958	0.0342643	0.0493183
A_44_P1047966	2.27096	1.9832	2.07899	1.85544	1.7634	1.929	1.63296	1.55335	1.53162	0.00197563	0.0233999	2.11105	1.57264	1.84928	0.146536	0.0533541	0.0829675
A_44_P1048380	12.589	12.651	12.6376	11.8801	11.6866	11.9128	11.6001	11.7294	11.7158	1.84823e-05	0.00425378	12.6259	11.6818	11.8265	0.032648	0.0710685	0.122259
A_44_P1048388	10.3754	10.4114	10.5902	10.2064	10.09	10.1338	10.1417	10.0119	10.0318	0.00277151	0.0273495	10.459	10.0618	10.1434	0.115053	0.0698726	0.0587727
A_44_P1048872	4.89957	4.45727	4.54875	4.56931	4.57423	4.57562	3.84623	3.41805	3.92366	0.0029539	0.0277926	4.63519	3.72931	4.57305	0.233479	0.272327	0.00331515
A_44_P1050015	8.39395	8.47063	8.26534	8.8179	8.83324	8.68009	8.78808	8.74063	8.64635	0.00272224	0.0272266	8.37664	8.72502	8.77708	0.103737	0.0721451	0.0843434
A_44_P1050325	5.45311	5.7311	5.62339	4.26921	4.09099	4.17158	3.86253	3.49218	3.96283	3.01638e-05	0.00517045	5.60253	3.77251	4.17726	0.140165	0.247898	0.0892476
A_44_P1050510	8.78169	8.67157	8.45476	9.06235	9.23571	9.34296	9.43743	9.50781	9.12829	0.00475296	0.0325271	8.63601	9.35784	9.21367	0.166344	0.201891	0.141594
A_44_P1050554	7.41888	7.07301	7.42829	6.97176	7.05047	7.07517	6.75669	6.50036	6.66423	0.00357924	0.029764	7.30673	6.64043	7.03247	0.202457	0.129814	0.0540037
A_44_P1051607	7.56403	7.60188	7.61313	7.99015	7.87362	7.77527	8.15719	7.93466	8.10829	0.00228604	0.0251154	7.59301	8.06672	7.87968	0.0257242	0.11695	0.10757
A_44_P1051894	2.12731	1.86982	1.94438	1.82484	1.78737	1.93634	3.70514	3.20846	3.55806	4.03858e-05	0.00576278	1.98051	3.49055	1.84952	0.13249	0.255129	0.0774918
A_44_P1052504	6.04854	6.02418	5.85507	5.12931	5.64852	5.52933	5.28044	4.9484	4.74679	0.00563194	0.0346765	5.97593	4.99188	5.43572	0.105377	0.269469	0.271969
A_44_P1053383	9.58255	9.65647	9.64909	9.45004	9.5676	9.56463	9.35154	9.14639	9.36539	0.006518	0.0368238	9.62937	9.28777	9.52742	0.0407152	0.12264	0.0670338
A_44_P1053706	9.87694	9.85179	9.65831	10.2676	10.2809	10.2499	10.5445	10.1689	10.343	0.00382225	0.0303606	9.79568	10.3522	10.2661	0.119629	0.187985	0.0155248
A_44_P1053772	11.5192	11.3762	11.6293	11.781	11.7579	12.0436	12.2064	12.2108	11.9099	0.00876801	0.0411318	11.5082	12.109	11.8609	0.126877	0.172479	0.158711
A_44_P1054506	4.02934	3.84953	3.86253	4.0346	3.92956	3.88732	3.42443	3.5741	3.2995	0.00180259	0.0225098	3.9138	3.43268	3.95049	0.100273	0.137484	0.0758365
A_44_P1055903	7.35155	7.11253	7.31273	7.00102	7.11416	6.94237	6.77288	6.74686	6.53976	0.00275059	0.0273107	7.25894	6.6865	7.01918	0.128267	0.127744	0.0873263
A_44_P1056100	3.64641	4.53879	4.42423	2.16715	2.50192	1.34905	1.34468	1.35238	1.49598	0.000580715	0.0142185	4.20314	1.39768	2.00604	0.485534	0.0852151	0.59308
A_44_P1056161	12.0436	12.1408	12.2293	12.3429	12.3657	12.1327	12.949	12.4976	12.8	0.00836178	0.0403784	12.1379	12.7488	12.2804	0.0928915	0.230015	0.128464
A_44_P105671	2.15216	1.92871	1.94413	1.89007	1.61427	1.73748	1.52076	1.51284	1.46509	0.00371073	0.0302875	2.00833	1.49956	1.74727	0.124793	0.0301151	0.138161
A_44_P105680	5.93629	6.02782	5.86762	5.93629	5.61367	5.82202	5.53601	5.46697	5.33213	0.00615949	0.0360729	5.94391	5.44504	5.79066	0.0803722	0.103693	0.163584
A_44_P1057055	7.94275	9.42229	9.83039	4.57498	5.48222	6.4642	6.88701	5.58753	6.14846	0.00561656	0.0346736	9.06514	6.20767	5.50713	0.993211	0.651763	0.944855
A_44_P1057137	8.64272	8.8621	8.8005	8.16238	8.22891	8.23355	7.99994	8.11509	8.10608	8.18973e-05	0.00758294	8.76844	8.07371	8.20828	0.113149	0.0640406	0.0398185
A_44_P1057197	6.84196	6.574	6.75017	6.20284	6.12263	6.25956	6.16129	6.29792	6.34079	0.00154782	0.0211523	6.72204	6.26667	6.19501	0.136177	0.0937399	0.0688029
A_44_P105741	11.421	11.3397	11.3374	11.7102	11.7383	11.6194	11.7732	11.7216	11.6293	0.000817731	0.0166213	11.366	11.708	11.6893	0.0475821	0.072921	0.0621224
A_44_P105785	5.07415	5.36422	4.96897	3.35844	3.66494	3.75563	3.5939	4.06871	4.02256	0.00036126	0.0124518	5.13578	3.89506	3.593	0.204703	0.261829	0.208134
A_44_P1058735	11.2976	11.7128	11.8023	12.1274	12.1502	11.9389	12.3191	12.6844	12.4297	0.00530071	0.0341952	11.6042	12.4778	12.0722	0.269321	0.187311	0.11596
A_44_P105889	5.21636	5.37679	5.34295	5.45993	5.68401	5.58797	5.92713	5.77144	6.0389	0.00182714	0.0226593	5.31203	5.91249	5.5773	0.084561	0.134326	0.112423
A_44_P1059252	1.78125	1.65482	1.81688	1.60035	1.61577	1.52326	1.48347	1.42571	1.42218	0.00234623	0.0253901	1.75098	1.44378	1.57979	0.085164	0.0344126	0.0495625
A_44_P1059604	1.34033	1.33089	1.35391	1.32399	1.35234	1.40354	1.4776	1.67616	1.60299	0.00547364	0.0345209	1.34171	1.58559	1.35996	0.0115755	0.100418	0.0403191
A_44_P1059985	10.0007	10.4425	10.334	8.26675	8.57452	8.62229	8.2642	8.11136	8.30169	1.8885e-05	0.00428061	10.2591	8.22575	8.48785	0.23024	0.100826	0.192965
A_44_P106364	6.96366	7.36991	6.75226	6.24954	6.21644	5.84019	5.15661	5.56927	5.80835	0.00212677	0.0243414	7.02861	5.51141	6.10206	0.313906	0.329703	0.227386
A_44_P106456	8.00425	8.11713	8.17266	7.46971	7.60365	7.35729	7.65711	7.59407	7.8531	0.0017685	0.0222887	8.09801	7.70142	7.47689	0.0858136	0.135082	0.123335
A_44_P106636	2.10807	1.92456	2.05929	1.7037	1.71762	1.54523	1.49503	1.41513	1.46525	0.000382334	0.0124518	2.03064	1.45847	1.65552	0.0950489	0.0403821	0.0957641
A_44_P107056	12.8648	12.6751	12.8214	12.4087	12.4785	12.4633	12.5069	12.4467	12.2573	0.00552156	0.0345329	12.7871	12.4037	12.4502	0.0994072	0.130276	0.0366732
A_44_P1070826	8.13518	8.23769	8.04606	8.32906	8.26074	8.19068	8.56451	8.74603	9.12016	0.00768523	0.0393064	8.13964	8.81023	8.26016	0.0958938	0.283334	0.0691909
A_44_P1071228	7.86388	7.76022	7.70793	7.66414	7.50695	7.71965	7.43396	7.29542	7.38286	0.00374735	0.0303318	7.77734	7.37075	7.63025	0.079373	0.0700622	0.110329
A_44_P107240	1.64907	1.54591	1.69995	1.54581	1.57105	1.51855	1.4663	1.41939	1.40066	0.00855314	0.040688	1.63165	1.42878	1.54513	0.0784824	0.0338112	0.0262562
A_44_P107634	6.51406	6.43014	6.81378	4.89809	5.07734	5.55963	4.6386	5.04915	5.13649	0.000678425	0.0150424	6.58599	4.94141	5.17835	0.201681	0.265856	0.342145
A_44_P107891	1.45798	1.7448	2.22016	3.22233	2.87408	3.44338	1.90819	2.03078	2.6562	0.00887271	0.0414249	1.80765	2.19839	3.17993	0.384952	0.401185	0.287006
A_44_P109271	4.97922	5.04839	4.52247	4.25643	4.18408	4.15188	4.09366	4.31795	4.22187	0.00675053	0.0373752	4.85003	4.21116	4.19746	0.285775	0.112529	0.0535413
A_44_P109303	8.41757	8.33688	8.23292	8.45404	8.71006	8.51717	8.24763	8.00332	7.99682	0.00987888	0.0432003	8.32912	8.08259	8.56042	0.0925681	0.142962	0.13338
A_44_P109532	1.51635	1.47049	1.55254	1.47477	1.50614	1.48097	1.42297	1.38565	1.36269	0.00657133	0.0369488	1.51313	1.39043	1.48729	0.0411217	0.0304263	0.0166122
A_44_P109862	7.74626	7.91115	7.8386	7.67858	7.51355	7.3387	6.70617	6.46627	6.94174	0.000583442	0.0142351	7.832	6.70473	7.51028	0.0826428	0.237735	0.169964
A_44_P109998	13.3354	13.4049	13.0245	12.1835	12.1804	12.0071	11.719	12.2981	11.584	0.00121017	0.0193835	13.2549	11.867	12.1237	0.202544	0.379357	0.100968
A_44_P110109	14.2095	14.3921	14.784	13.8392	13.6946	13.5642	13.6766	13.6554	13.9615	0.00803974	0.0398017	14.4619	13.7645	13.6993	0.29351	0.170908	0.137563
A_44_P110120	9.42335	10.0241	10.4517	6.70144	7.08235	6.68857	7.66954	9.70716	8.65227	0.00360446	0.0297847	9.9664	8.67632	6.82412	0.516623	1.01902	0.223726
A_44_P110352	9.94498	10.4399	10.2955	8.43936	8.49304	8.73053	8.52113	8.62573	8.64187	3.58965e-05	0.00574208	10.2268	8.59624	8.55431	0.254526	0.0655472	0.154952
A_44_P110450	3.50616	3.51042	3.28237	3.35139	3.60472	3.37398	2.79747	2.84913	2.38589	0.00329058	0.0288686	3.43298	2.6775	3.44336	0.130454	0.253858	0.140194
A_44_P110495	2.46002	2.39709	2.52049	2.28294	2.90836	2.52812	3.61623	3.26602	3.95559	0.00371103	0.0302875	2.4592	3.61261	2.57314	0.0617071	0.3448	0.315131
A_44_P110709	1.2415	1.789	1.25013	2.74734	2.59053	3.03317	1.81789	1.52628	1.26325	0.00155531	0.0211624	1.42688	1.53581	2.79035	0.313635	0.277443	0.22443
A_44_P110858	4.93894	5.47816	5.56714	3.19349	3.43809	3.65545	4.01686	3.97927	3.94242	0.000176925	0.00980294	5.32808	3.97952	3.42901	0.339927	0.0372177	0.231112
A_44_P110972	2.37513	2.41585	2.49397	2.8486	2.48531	2.11015	3.3405	3.60068	3.5598	0.00205665	0.0239996	2.42832	3.50033	2.48135	0.0603941	0.139918	0.369243
A_44_P111111	3.61372	3.21255	3.63753	2.71506	3.16479	3.09775	2.16697	2.55143	2.2995	0.00240403	0.0256704	3.48793	2.3393	2.99254	0.238788	0.195293	0.242624
A_44_P111723	4.93526	5.30006	5.04888	4.8849	5.36352	4.54376	5.91434	5.99141	5.87991	0.00738236	0.0386607	5.09473	5.92855	4.93073	0.186671	0.057091	0.411796
A_44_P111793	1.33495	1.32828	1.34948	1.31502	1.32463	1.3572	3.42887	2.05659	3.04211	0.00589985	0.0353669	1.33757	2.84252	1.33228	0.010839	0.707577	0.0221074
A_44_P111940	1.91538	1.75504	1.77865	1.72686	1.60487	1.67473	1.55346	1.53723	1.5283	0.00453097	0.0318381	1.81636	1.53967	1.66882	0.0865631	0.0127538	0.0612082
A_44_P112119	4.85657	4.76334	4.68991	4.4106	4.4661	4.67681	4.3025	4.28653	4.42264	0.00636437	0.0365431	4.76994	4.33722	4.51784	0.0835258	0.0744045	0.14044
A_44_P112371	5.06835	5.02141	4.81267	5.8982	5.63706	5.55598	5.76797	5.41606	5.94259	0.00628299	0.0363529	4.96748	5.70888	5.69708	0.136106	0.268191	0.178832
A_44_P112622	4.23051	4.27995	4.4204	4.55418	4.55593	4.25207	3.3369	3.50229	3.48016	0.000131148	0.00898541	4.31029	3.43978	4.45406	0.0985104	0.0897856	0.17493
A_44_P112981	8.71568	8.63077	8.66348	9.08029	9.31877	9.09615	8.94578	8.65483	8.88693	0.00625224	0.0362438	8.66997	8.82918	9.16507	0.0428289	0.153831	0.133342
A_44_P113088	4.0725	3.96923	4.20395	6.16753	5.81195	5.18726	6.24025	5.80677	7.3854	0.00496161	0.0330067	4.08189	6.47747	5.72225	0.117644	0.815611	0.496256
A_44_P113157	4.51745	3.94734	4.11433	5.48988	5.58269	5.40865	5.47834	5.56219	6.1592	0.00102798	0.0184023	4.19304	5.73324	5.49374	0.293089	0.371261	0.087088
A_44_P113536	8.05544	7.88211	7.94119	8.14834	8.24103	8.18615	8.35345	8.21718	8.21497	0.00560835	0.0346555	7.95958	8.26187	8.19184	0.0881159	0.0793197	0.0466089
A_44_P113806	1.51119	1.48282	1.4665	1.45779	1.40465	1.40695	1.35298	1.34539	1.40978	0.00844338	0.0405629	1.48684	1.36938	1.42313	0.0226104	0.0351881	0.0300409
A_44_P113933	7.09749	7.09975	7.30305	8.15615	8.25258	8.14958	7.95184	8.11846	8.27173	7.55691e-05	0.00758294	7.16677	8.11401	8.1861	0.118032	0.159991	0.0576625
A_44_P114004	1.87721	1.73513	1.88793	1.64766	1.65321	1.56096	1.50173	1.44588	1.6292	0.00815186	0.0400692	1.83342	1.5256	1.62061	0.0852936	0.0939641	0.0517331
A_44_P114023	7.04622	6.97642	7.04672	7.45636	7.34576	7.28261	7.45093	7.65047	7.44267	0.00129416	0.019783	7.02312	7.51469	7.36158	0.0404428	0.117663	0.087948
A_44_P114160	2.03976	1.81254	1.85447	1.83035	1.59814	1.75387	1.53845	1.54067	1.46415	0.00958247	0.0427259	1.90226	1.51442	1.72745	0.120917	0.0435491	0.118341
A_44_P114393	6.68723	6.3986	6.3074	7.27379	7.2856	7.05332	6.98303	7.13479	7.17803	0.00182839	0.0226593	6.46441	7.09862	7.20424	0.198282	0.102414	0.130831
A_44_P114500	1.97808	1.76781	1.88256	1.74075	1.67456	1.82677	1.5746	1.53751	1.57257	0.00661692	0.0370607	1.87615	1.56156	1.74736	0.105279	0.0208558	0.0763214
A_44_P114819	2.21505	1.94725	2.06582	1.82231	1.75458	1.84362	1.59666	1.53228	1.51543	0.000864009	0.0170428	2.07604	1.54812	1.80684	0.134192	0.0428692	0.0464936
A_44_P115623	2.18165	1.91119	1.97635	1.84138	1.72016	1.95096	1.65351	1.58679	1.53914	0.0089522	0.0416199	2.02306	1.59315	1.8375	0.141151	0.0574529	0.115448
A_44_P115792	1.46518	1.43631	1.45909	1.42874	1.41242	1.40198	1.37604	1.36494	1.4018	0.00432552	0.0314203	1.45353	1.38092	1.41438	0.0152204	0.0189082	0.0134867
A_44_P115886	10.2945	10.1783	10.0209	9.23602	9.44863	9.52822	9.27789	8.89519	9.38588	0.00173882	0.0220821	10.1646	9.18632	9.40429	0.137292	0.257843	0.151062
A_44_P116237	4.64507	4.62308	4.93341	4.32784	4.37259	4.56093	5.01233	5.16984	5.30087	0.0026071	0.0266045	4.73385	5.16102	4.42045	0.173175	0.144473	0.123697
A_44_P116381	3.79389	4.19231	4.16888	4.20877	4.09994	4.6601	5.9806	5.74312	5.02547	0.0042025	0.0312284	4.05169	5.58306	4.32294	0.223569	0.497277	0.297023
A_44_P116443	6.05736	6.00846	5.91758	6.58639	6.52491	6.36251	5.68026	5.97445	5.9541	0.00185009	0.0227917	5.99447	5.8696	6.49127	0.0709319	0.16429	0.115671
A_44_P116768	2.25978	1.97707	2.0434	1.86534	1.74751	1.95028	3.27833	3.37398	3.81787	0.000102866	0.00825445	2.09342	3.49006	1.85438	0.147844	0.287895	0.101825
A_44_P116875	8.56337	8.34394	8.56378	8.09073	8.12921	8.09705	7.71141	7.94184	7.63591	0.00086928	0.0170662	8.49036	7.76305	8.10566	0.126805	0.159373	0.0206335
A_44_P116904	2.04069	1.83886	2.12168	2.62768	1.93105	3.13174	4.37239	4.07185	3.46111	0.00433322	0.0314203	2.00041	3.96845	2.56349	0.145649	0.464356	0.602915
A_44_P116915	2.22932	1.96131	2.07829	1.81778	1.75814	1.81347	1.58673	1.52297	1.51358	0.000594023	0.0142351	2.08964	1.54109	1.79646	0.134366	0.0398039	0.0332604
A_44_P117072	10.0349	9.77466	9.87465	10.3327	10.349	10.4358	10.2	10.139	10.2665	0.00180443	0.0225139	9.89474	10.2018	10.3725	0.131278	0.0637769	0.0554497
A_44_P117078	12.6312	12.5149	12.7039	13.3354	13.2634	13.2963	13.1927	13.202	12.9299	0.000603271	0.0143645	12.6167	13.1082	13.2984	0.0953611	0.154514	0.036042
A_44_P117166	2.06342	1.89763	1.88813	1.87935	1.57249	1.6408	1.49255	1.48783	1.45281	0.00560379	0.0346544	1.94973	1.47773	1.69755	0.0985769	0.0217106	0.161108
A_44_P117757	2.92651	2.67383	2.7963	3.71434	3.56243	3.30572	3.4103	3.13701	3.47409	0.00529611	0.0341802	2.79888	3.34047	3.52749	0.126362	0.179063	0.206539
A_44_P118415	1.41738	1.36952	1.3684	1.39685	1.30577	1.32364	2.30509	1.76358	2.23946	0.0028473	0.0275429	1.3851	2.10271	1.34209	0.0279612	0.295522	0.0482622
A_44_P118505	1.84177	1.69625	1.72831	1.6866	1.579	1.63246	1.5269	1.52243	1.51737	0.00551798	0.0345249	1.75545	1.52223	1.63269	0.0764608	0.00476638	0.0537999
A_44_P118688	12.0948	12.5556	12.5211	11.7349	11.7691	11.8283	11.7182	11.746	11.4475	0.00451144	0.0317573	12.3905	11.6372	11.7775	0.256648	0.16493	0.0472468
A_44_P118793	3.857	4.0057	4.24133	4.03489	4.24843	4.09451	3.66626	3.49552	3.59778	0.00641837	0.0366204	4.03467	3.58652	4.12595	0.193798	0.0859284	0.110189
A_44_P119167	1.96131	1.77346	1.82032	1.74923	1.62848	1.7552	1.57531	1.55019	1.5242	0.00612939	0.0359987	1.8517	1.5499	1.71097	0.0977748	0.0255519	0.0715008
A_44_P119244	7.50695	7.6543	7.45473	7.71736	7.57475	7.80568	8.3917	8.26712	7.90963	0.00815581	0.0400692	7.53866	8.18948	7.69926	0.103498	0.250234	0.116524
A_44_P119405	10.7184	10.4837	10.4674	10.8749	10.8982	10.9694	10.766	10.8099	10.8015	0.00644917	0.0367027	10.5565	10.7925	10.9142	0.140427	0.0233036	0.0492384
A_44_P119575	6.06696	5.77058	5.7183	6.55214	6.5029	6.38029	6.33465	6.32225	6.54517	0.00299023	0.0278702	5.85195	6.40069	6.47844	0.188034	0.125276	0.0884988
A_44_P119594	6.99503	7.19105	7.15434	6.80402	6.69531	7.03161	8.69175	8.39477	8.03022	0.000341664	0.012226	7.11347	8.37225	6.84365	0.104204	0.331342	0.171619
A_44_P119669	1.56515	1.5409	1.51025	1.47442	1.42806	1.42601	1.39092	1.3846	1.42413	0.00149365	0.0208981	1.53877	1.39988	1.44283	0.0275165	0.0212349	0.0273787
A_44_P120167	1.59622	1.57531	1.5401	1.47572	1.45175	1.44768	3.73665	2.92885	3.32579	0.000105803	0.00825445	1.57054	3.33043	1.45838	0.0283586	0.403919	0.015148
A_44_P120405	3.784	3.67887	3.06434	3.39489	3.69005	3.77171	4.67381	6.29709	5.32667	0.00761933	0.0391084	3.50907	5.43252	3.61888	0.38872	0.816801	0.198233
A_44_P120608	3.20846	3.19079	3.50565	1.91642	2.80954	1.70087	1.78605	1.99849	1.687	0.00597055	0.0355571	3.30163	1.82385	2.14228	0.176903	0.159146	0.587831
A_44_P121092	5.16175	5.55404	5.22148	5.44461	5.05457	5.02831	4.57446	4.52895	4.63127	0.00601195	0.0356617	5.31242	4.57823	5.17583	0.211369	0.051264	0.233138
A_44_P121187	1.60651	1.59343	1.55546	1.46251	1.45551	1.44212	1.42303	1.42246	1.44288	7.91828e-05	0.00758294	1.58513	1.42945	1.45338	0.0265212	0.0116325	0.0103585
A_44_P121351	3.52905	3.66423	3.51521	3.70131	3.90086	3.89309	4.91202	4.36645	4.50499	0.00116343	0.0190044	3.5695	4.59449	3.83175	0.0823319	0.283582	0.113033
A_44_P121417	1.33785	1.33672	1.33003	1.33468	1.42971	1.4426	1.98038	1.90576	2.267	0.000480222	0.0135007	1.33487	2.05104	1.40233	0.00423029	0.190705	0.0589401
A_44_P121635	1.32513	1.31964	1.55225	2.33927	1.31611	2.20951	3.196	3.32959	3.00973	0.00193256	0.0233342	1.39901	3.17844	1.95496	0.132744	0.160651	0.557056
A_44_P121656	1.31032	1.33889	1.31306	1.29653	1.30695	1.37025	2.0508	1.80329	1.58786	0.00653355	0.0368699	1.32076	1.81398	1.32458	0.015764	0.231659	0.0398919
A_44_P121728	5.0195	5.25788	5.21055	5.2184	5.4579	5.2498	5.84055	5.61055	5.57936	0.00820765	0.0401518	5.16264	5.67682	5.3087	0.126205	0.142651	0.130162
A_44_P122201	3.8479	3.96676	3.81956	4.32845	4.34511	4.57779	4.35936	4.30223	4.24239	0.00122589	0.0195099	3.87807	4.30133	4.41712	0.0781027	0.0584926	0.139392
A_44_P122841	4.40896	4.88185	4.70158	3.77114	3.83068	4.09873	4.68046	4.51599	4.38784	0.00577567	0.0350808	4.66413	4.5281	3.90019	0.238664	0.146688	0.174504
A_44_P123926	6.48401	7.47252	7.0612	4.9226	5.50519	5.34155	5.47672	5.84019	6.03716	0.00320447	0.0286544	7.00591	5.78469	5.25645	0.496571	0.284314	0.300477
A_44_P124055	1.6558	1.61043	1.60232	1.52685	1.50648	1.51675	1.461	1.45576	1.50101	0.000503775	0.0135271	1.62285	1.47259	1.51669	0.0288212	0.0247528	0.0101852
A_44_P124259	8.54254	8.57937	8.40585	9.09463	9.12399	8.83551	8.94545	8.92916	8.8203	0.00354537	0.0296471	8.50925	8.8983	9.01804	0.0914247	0.068044	0.15876
A_44_P124324	1.45522	1.42262	1.43451	2.47871	1.88649	2.2774	1.58406	1.38113	1.59943	0.00429393	0.0314061	1.43745	1.52154	2.2142	0.016498	0.121844	0.301126
A_44_P125069	9.90077	9.64347	9.95389	10.3836	10.4526	10.0712	10.4732	10.3951	10.3977	0.0075013	0.03879	9.83271	10.422	10.3025	0.166024	0.0443873	0.203268
A_44_P125355	1.50725	1.46525	1.5436	1.4653	1.50126	1.46643	1.4168	1.37646	1.35426	0.00707937	0.0380392	1.50537	1.38251	1.47766	0.0392087	0.0317082	0.0204431
A_44_P125788	1.77375	1.67319	1.8409	1.58432	1.61493	1.46614	1.46069	1.38946	1.40664	0.00276963	0.0273495	1.76261	1.41893	1.55513	0.0844083	0.0371746	0.0785771
A_44_P125803	4.97945	4.81246	5.44611	5.62229	4.60047	4.61809	1.75267	1.61882	1.92346	7.8869e-05	0.00758294	5.07934	1.76498	4.94695	0.328421	0.152693	0.584929
A_44_P125843	1.5193	2.63189	1.47669	1.52874	1.41734	1.42864	3.41705	3.36249	2.89449	0.00471868	0.0324727	1.87596	3.22468	1.45824	0.655001	0.28725	0.0613146
A_44_P126061	10.6566	12.0427	11.9219	8.32675	8.51772	8.95936	9.31021	9.90128	9.83371	0.00124565	0.0195773	11.5404	9.68173	8.60128	0.767764	0.323516	0.324474
A_44_P126134	5.32085	5.18283	5.37177	5.66822	6.02382	5.81229	5.30993	5.29217	5.36352	0.00236235	0.0254504	5.29182	5.32187	5.83478	0.0977579	0.0371437	0.17886
A_44_P126147	2.41585	4.32112	4.55058	1.39417	1.45308	1.76654	1.50375	1.40156	1.3265	0.00967724	0.0428953	3.76252	1.4106	1.53793	1.17188	0.0889678	0.200163
A_44_P126154	8.77334	8.59601	8.53084	9.12057	9.10081	8.96299	8.83551	8.77227	8.86445	0.00373638	0.0303243	8.6334	8.82408	9.06146	0.125499	0.047141	0.0858463
A_44_P126406	13.4832	13.354	13.5394	14.1198	14.0952	14.1575	14.1081	14.2277	14.0767	4.28096e-05	0.00586029	13.4589	14.1375	14.1241	0.0950854	0.0796709	0.0313743
A_44_P126506	4.10627	4.11887	4.28593	4.65142	4.22921	4.5527	3.21065	3.43537	3.71057	0.00207641	0.0240641	4.17036	3.4522	4.47777	0.100284	0.250382	0.220853
A_44_P126590	10.417	10.6019	10.678	10.167	10.3402	10.2116	10.0954	10.0903	10.0644	0.002038	0.0238858	10.5656	10.0834	10.2396	0.134192	0.0166133	0.0899393
A_44_P126681	8.12275	8.11654	8.07024	8.57982	8.48795	8.25525	8.68009	8.50502	8.73912	0.00443282	0.0316092	8.10318	8.64141	8.44101	0.0286874	0.121747	0.167302
A_44_P126714	4.53879	5.14223	4.73977	2.60426	2.27023	1.39983	2.57245	2.56229	2.82632	0.000430615	0.0128327	4.80693	2.65369	2.09144	0.307276	0.149589	0.621798
A_44_P126720	1.82593	1.59511	1.72055	2.09526	1.58497	2.0792	3.71565	3.78638	3.24004	0.000173857	0.00974123	1.71386	3.58069	1.91981	0.115553	0.297123	0.290092
A_44_P127196	7.16148	7.49733	7.18899	6.43195	6.69448	6.77904	6.86216	6.96953	6.77804	0.00711268	0.0380403	7.2826	6.86991	6.63516	0.186468	0.0959788	0.180994
A_44_P128386	5.38497	5.36753	5.31312	5.62463	5.6566	5.5631	5.23499	5.22757	5.17751	4.65851e-05	0.00606012	5.35521	5.21335	5.61478	0.0374766	0.0312627	0.0475223
A_44_P128829	2.08804	1.84148	1.9598	1.795	1.71446	1.88829	1.60091	1.54851	1.64209	0.00782968	0.039445	1.96311	1.59717	1.79925	0.123317	0.0469062	0.0869923
A_44_P128840	10.852	10.594	10.8958	11.2851	11.1819	11.3018	11.1965	11.1935	10.9911	0.00770775	0.0393081	10.7806	11.127	11.2563	0.163047	0.11776	0.0649632
A_44_P129262	9.05674	8.78673	8.75201	8.57897	8.69065	8.57132	8.39115	8.17018	7.95118	0.00571079	0.0348864	8.86516	8.17083	8.61365	0.166819	0.219986	0.0667993
A_44_P129407	3.5431	3.29232	3.53055	3.31653	3.34075	3.66935	2.55143	3.02033	2.34841	0.00973145	0.0429954	3.45532	2.64005	3.44221	0.141304	0.344618	0.197079
A_44_P129549	3.23374	2.37179	2.60139	2.42352	2.33356	2.42143	1.2372	1.89251	1.21224	0.00899403	0.0416443	2.73564	1.44732	2.39284	0.446381	0.385751	0.0513467
A_44_P130194	3.74662	4.06191	4.10216	3.54397	3.67328	3.80612	4.17647	4.60745	4.43851	0.00804709	0.0398134	3.97023	4.40747	3.67446	0.194696	0.21716	0.131078
A_44_P130732	5.48867	5.83538	5.869	4.89177	5.0066	4.8194	4.58009	5.07864	4.88438	0.00258031	0.0264756	5.73102	4.8477	4.90592	0.210555	0.251294	0.094399
A_44_P130856	6.15818	7.45275	6.74506	3.77697	2.99214	4.30979	3.84972	4.56871	4.44886	0.00136662	0.0200773	6.78533	4.2891	3.69297	0.648222	0.385202	0.662828
A_44_P131046	14.3498	14.0999	14.1198	14.7197	14.7632	14.7957	14.8515	14.7734	14.448	0.00648956	0.0367742	14.1898	14.691	14.7595	0.138891	0.213999	0.0381425
A_44_P131133	5.15068	5.10603	4.97858	4.91035	5.21247	4.73352	3.65867	3.9677	4.33741	0.0030959	0.0283097	5.07843	3.98793	4.95211	0.0893084	0.339821	0.24219
A_44_P131663	2.16091	1.93126	2.06462	1.76165	1.73857	1.65342	1.53652	1.47959	1.49076	0.000349603	0.0122701	2.05226	1.50229	1.71788	0.115324	0.0301689	0.0570065
A_44_P131986	2.11745	1.86864	1.99596	1.79767	1.7294	1.84462	1.59083	1.53616	1.50626	0.00171468	0.0219617	1.99402	1.54441	1.79056	0.124417	0.0428865	0.0579365
A_44_P132239	1.45822	1.42441	1.45554	1.41749	1.41283	1.42723	1.37887	1.36526	1.37659	0.00107824	0.018806	1.44606	1.37357	1.41918	0.0187921	0.00728837	0.00734853
A_44_P132333	6.082	6.13265	6.13901	6.034	6.26886	6.28395	5.73625	5.68186	5.47245	0.00192316	0.0232978	6.11789	5.63019	6.1956	0.0312383	0.139285	0.140156
A_44_P132533	6.8091	6.95795	6.84723	6.81262	6.63997	6.81988	6.46061	6.48346	6.42706	0.00136525	0.0200773	6.87143	6.45704	6.75749	0.0773181	0.0283687	0.101842
A_44_P132743	2.16886	1.8927	1.98849	1.83437	1.73109	1.96847	1.63911	1.57444	1.52813	0.00839945	0.040498	2.01669	1.58056	1.84464	0.140224	0.0557448	0.119023
A_44_P132770	2.12383	1.92609	2.06114	1.71748	1.72147	1.56723	1.50364	1.42788	1.47122	0.000371911	0.0124518	2.03702	1.46758	1.66873	0.101048	0.038011	0.0879196
A_44_P132918	2.22839	1.96005	1.99903	1.8999	1.66271	1.84718	1.55335	1.53195	1.47553	0.00320356	0.0286544	2.06249	1.52028	1.80326	0.14499	0.0402017	0.124544
A_44_P132937	1.99115	1.83791	1.83437	1.85035	1.54906	1.62186	1.49139	1.49442	1.44964	0.00921354	0.0419751	1.88781	1.47848	1.67376	0.0895168	0.0250224	0.15721
A_44_P133034	5.80835	5.54073	6.34781	5.58347	2.27259	5.55994	1.23084	1.22262	1.29226	0.00606912	0.0358224	5.89897	1.24857	4.472	0.411101	0.0380546	1.90478
A_44_P133044	10.4833	10.516	10.4876	10.5286	10.3956	10.6432	10.1801	10.1315	10.0823	0.00140346	0.0203644	10.4956	10.1313	10.5225	0.0177975	0.0488653	0.123912
A_44_P133182	1.59054	1.57056	1.53436	1.47485	1.44576	1.44129	1.40895	1.40747	1.43529	0.000378879	0.0124518	1.56515	1.41724	1.45397	0.0284794	0.0156529	0.0182209
A_44_P133393	1.50391	1.46415	1.4942	1.46269	1.44846	1.45929	1.40457	1.39664	1.41714	0.00114832	0.0190044	1.48742	1.40612	1.45681	0.0207268	0.0103386	0.00743212
A_44_P133924	2.79348	2.52203	2.99756	3.84829	3.75675	3.51371	3.07472	2.81253	2.92762	0.00183413	0.0226765	2.77102	2.93829	3.70625	0.238559	0.131424	0.17291
A_44_P134077	1.70486	1.6376	1.62956	1.57567	1.52874	1.53866	1.4802	1.473	1.516	0.00156052	0.021176	1.65734	1.48973	1.54769	0.0413475	0.0230324	0.0247384
A_44_P134342	5.44754	5.32647	5.63157	5.91527	5.86607	6.01283	5.83462	5.75378	5.87273	0.00394358	0.0305339	5.46853	5.82038	5.93139	0.153627	0.0607409	0.0746953
A_44_P134626	4.7133	4.57746	4.6601	4.42757	4.50167	4.18273	3.1858	3.30011	3.68915	0.000378515	0.0124518	4.65029	3.39169	4.37066	0.0684516	0.263876	0.166914
A_44_P134917	7.22262	6.88856	6.85289	7.44718	7.66779	7.76197	7.70338	8.05846	8.07706	0.00249694	0.0261768	6.98802	7.9463	7.62565	0.20395	0.210578	0.161571
A_44_P135183	4.23618	3.76351	3.4932	1.24556	1.50441	1.22639	1.22215	1.91049	2.13342	0.000310554	0.0118912	3.83097	1.75535	1.32545	0.376052	0.475028	0.155279
A_44_P135339	8.3457	8.64081	8.58456	9.82935	10.047	9.48958	9.40153	9.35511	9.82748	0.00146019	0.0207056	8.52369	9.52804	9.78866	0.156691	0.260358	0.280951
A_44_P135401	4.94507	4.8286	4.03132	4.65663	4.9553	4.74971	6.43058	6.1152	6.09255	0.00156801	0.0212285	4.60166	6.21277	4.78721	0.497356	0.188962	0.152823
A_44_P135543	2.1379	1.87799	1.95059	1.82883	1.7085	1.93756	1.63898	1.58269	1.53436	0.00995319	0.0433857	1.98883	1.58535	1.82496	0.134106	0.0523622	0.114583
A_44_P135728	1.49022	1.53691	1.47748	1.47561	1.43304	1.42068	3.49866	3.09198	2.14589	0.00674493	0.0373752	1.50154	2.91218	1.44311	0.0312874	0.694078	0.0288181
A_44_P135958	4.42324	4.50721	4.64833	5.00373	4.95121	5.15865	4.624	4.34708	4.59067	0.00350849	0.0295535	4.52626	4.52058	5.03787	0.113747	0.151177	0.107851
A_44_P136238	4.91697	4.58097	4.72108	4.81417	4.79438	4.91965	4.37622	4.15128	3.97228	0.00384899	0.0304691	4.73967	4.16659	4.84273	0.168766	0.202404	0.0673407
A_44_P136285	6.38179	6.60984	5.97566	7.78669	7.30547	7.49106	7.71606	7.76577	7.54432	0.000886126	0.0173287	6.32243	7.67538	7.52774	0.321227	0.116195	0.242699
A_44_P136342	12.3897	12.4132	11.836	11.3282	11.3168	11.3085	10.6657	10.6081	11.3118	0.00370525	0.0302875	12.213	10.8618	11.3178	0.326674	0.390731	0.00991003
A_44_P136429	1.47941	1.91098	2.41897	1.43615	1.43741	1.46643	2.74354	3.40273	2.59114	0.00754274	0.0388432	1.93645	2.91247	1.44666	0.470295	0.43136	0.0171289
A_44_P136730	10.5689	10.8794	10.7629	10.0967	9.86837	10.1863	10.0532	9.92287	9.35107	0.00875304	0.0410874	10.7371	9.7757	10.0504	0.156843	0.373466	0.163921
A_44_P137194	11.7482	11.5079	11.5439	11.9389	11.9487	11.8583	11.8547	11.8069	11.9331	0.00968974	0.0429226	11.6	11.8649	11.9153	0.129626	0.0637198	0.0496302
A_44_P137356	11.7233	11.637	11.7482	11.8479	11.6554	11.6086	11.1447	11.3713	11.0525	0.00333831	0.0290814	11.7028	11.1895	11.704	0.0583656	0.164062	0.126824
A_44_P137681	13.1062	12.907	13.2501	12.8555	12.8271	12.7781	12.6761	12.6664	12.7285	0.00897761	0.0416336	13.0878	12.6903	12.8202	0.172263	0.0334178	0.0391605
A_44_P137911	10.0342	10.0894	9.94081	9.43396	9.47016	9.53354	9.19137	9.2935	9.3036	1.67817e-05	0.00418423	10.0215	9.26282	9.47922	0.0751286	0.0620865	0.0504032
A_44_P137942	1.62175	1.53527	1.57991	1.55009	1.51141	1.52882	1.46156	1.46136	1.46383	0.00573259	0.0349042	1.57898	1.46225	1.53011	0.0432458	0.00137056	0.0193723
A_44_P138120	2.79447	2.52739	3.49701	2.80106	3.16591	2.44844	1.7683	1.72193	1.47765	0.00965133	0.0428693	2.93962	1.65596	2.80514	0.50084	0.156152	0.358751
A_44_P138231	6.97283	7.00634	6.8686	7.27747	7.643	7.4078	6.65835	6.8815	6.84607	0.00249594	0.0261768	6.94926	6.79531	7.44276	0.0718328	0.119926	0.185258
A_44_P138689	7.01137	7.06462	6.94563	6.99206	7.29799	7.08777	6.7073	6.64518	6.53499	0.00338186	0.0292156	7.00721	6.62916	7.12594	0.059604	0.0872661	0.156495
A_44_P138767	2.19119	1.93342	2.05863	1.8062	1.749	1.79984	1.58118	1.52125	1.5078	0.000609938	0.0144378	2.06108	1.53674	1.78501	0.128903	0.0390663	0.0313534
A_44_P139697	6.41472	5.82701	5.96586	7.51635	7.55185	7.51007	7.67498	7.68302	7.909	7.90011e-05	0.00758294	6.0692	7.75567	7.52609	0.307178	0.132854	0.0225262
A_44_P139894	7.50463	7.75293	7.52696	7.06606	6.92671	7.02533	7.17997	7.18466	6.9714	0.00156709	0.0212285	7.59484	7.11201	7.00604	0.137365	0.121795	0.0716513
A_44_P139989	11.0416	11.0795	11.0947	11.771	11.3218	11.6188	11.746	11.975	11.8682	0.00177045	0.0222945	11.0719	11.8631	11.5705	0.0273349	0.114598	0.228457
A_44_P140003	4.90521	5.02209	5.33746	5.28474	5.66921	5.09498	4.41792	4.45025	4.48249	0.00539909	0.0344038	5.08826	4.45022	5.34964	0.22359	0.0322832	0.292566
A_44_P140148	6.38055	6.301	6.249	7.71077	7.3148	7.28775	7.2868	7.33531	8.06634	0.00334747	0.0290814	6.31018	7.56282	7.43777	0.0662523	0.436738	0.236809
A_44_P140358	7.41073	7.76197	7.48325	5.80835	5.53793	6.09355	5.83076	6.60025	6.26666	0.000868307	0.0170662	7.55199	6.23255	5.81328	0.185435	0.385878	0.277842
A_44_P140449	14.1792	14.1598	14.1575	14.1375	13.8767	14.0218	13.7794	13.6437	13.7076	0.00170238	0.0219617	14.1655	13.7102	14.012	0.0119386	0.0678756	0.130682
A_44_P140514	5.26033	5.46299	5.79077	4.27072	4.30402	4.37743	4.17587	3.68915	3.87396	0.000234735	0.0105772	5.5047	3.91299	4.31739	0.26767	0.245695	0.0545937
A_44_P140676	6.44799	6.14515	6.4114	6.04562	5.89321	6.08515	5.96106	5.81086	5.86946	0.00902319	0.0416911	6.33485	5.88046	6.008	0.165297	0.0757005	0.101352
A_44_P140896	1.19531	1.20891	1.20038	1.20432	1.18968	1.22354	1.71719	1.52154	1.92926	0.00244227	0.0259781	1.20153	1.72266	1.20584	0.00687179	0.203915	0.0169827
A_44_P141377	15.9214	15.8544	16.1191	15.3218	15.237	15.4708	15.4093	15.4269	15.7998	0.00963678	0.0428301	15.965	15.5454	15.3432	0.137595	0.22056	0.11835
A_44_P141475	2.27203	1.94878	2.03976	1.87829	1.72479	1.98695	1.66585	1.58042	1.48062	0.00983572	0.0431376	2.08686	1.57563	1.86334	0.166695	0.0927087	0.131714
A_44_P141719	5.36491	5.02169	4.7684	5.25319	5.01154	5.53233	6.42368	6.2081	6.11952	0.00215914	0.0245447	5.05166	6.25044	5.26568	0.299382	0.156435	0.26062
A_44_P141897	5.0164	4.96354	4.40503	8.66311	7.91669	7.76701	7.18536	7.07732	7.90036	0.000178448	0.00985083	4.79499	7.38768	8.1156	0.338749	0.447271	0.480026
A_44_P141899	8.51111	8.52438	8.25186	8.94993	8.8551	8.89175	9.18414	9.01591	8.82071	0.00512365	0.0335595	8.42911	9.00692	8.89893	0.153652	0.181881	0.047821
A_44_P142168	5.05137	5.20564	5.10513	5.33483	5.23056	5.23606	6.12951	5.83475	6.90378	0.00867273	0.0408878	5.12071	6.28934	5.26715	0.0783073	0.552146	0.0586778
A_44_P142265	5.74564	5.23998	5.60386	5.40937	5.68745	5.62703	6.73956	6.59665	6.32762	0.00159647	0.0213624	5.52983	6.55461	5.57462	0.260829	0.209164	0.146262
A_44_P142376	9.20451	8.97051	9.05489	9.36031	9.5068	9.46216	9.5025	9.46816	9.29451	0.00823547	0.040189	9.07664	9.42172	9.44309	0.118507	0.111503	0.0750846
A_44_P142401	10.1752	10.5917	10.4275	10.1555	10.3451	10.3004	9.55819	9.289	9.72541	0.00235924	0.0254504	10.3981	9.5242	10.267	0.209844	0.220179	0.0990787
A_44_P142428	9.73129	9.82994	9.9632	9.36092	9.25122	9.33339	9.43783	9.46294	9.23522	0.00154825	0.0211523	9.84148	9.37867	9.31518	0.116385	0.124857	0.0570727
A_44_P142505	4.5539	3.69768	4.6706	4.48859	3.9427	4.8597	6.34328	6.41007	5.74742	0.00426682	0.0313241	4.30739	6.16692	4.43033	0.531241	0.364833	0.461269
A_44_P142531	1.41923	1.38946	1.42431	1.93168	1.39335	1.42367	2.38169	2.50495	2.87	0.00150635	0.0209363	1.411	2.58555	1.5829	0.0188272	0.253936	0.302433
A_44_P142724	7.11416	7.43	7.5292	5.28863	4.80611	5.12419	5.33234	5.09498	5.17167	1.38823e-05	0.00377598	7.35779	5.19966	5.07298	0.216738	0.121134	0.245301
A_44_P142779	1.43583	1.40452	1.43635	1.39691	1.39776	1.4155	1.36506	1.35293	1.35604	0.00169896	0.0219617	1.42557	1.35801	1.40339	0.0182248	0.00629905	0.0104976
A_44_P142843	5.33061	5.17686	5.39137	5.56714	5.40324	5.65683	5.18537	5.08915	4.92059	0.00989294	0.043236	5.29961	5.06504	5.5424	0.110565	0.134024	0.128592
A_44_P143238	1.21361	1.21925	1.83961	3.00042	2.92344	2.36781	3.10213	2.46379	3.68703	0.00941745	0.0424352	1.42416	3.08432	2.76389	0.359804	0.611819	0.345167
A_44_P143886	11.139	11.7226	11.3205	13.2717	13.2067	13.1183	12.6125	13.6521	14.4427	0.00659543	0.0369861	11.394	13.5691	13.1989	0.298687	0.917939	0.0770049
A_44_P144306	1.59854	1.52203	1.57444	1.53371	1.50958	1.53739	1.45798	1.45527	1.44782	0.00386061	0.0304934	1.565	1.45369	1.52689	0.039119	0.00526414	0.0151076
A_44_P144900	1.58679	1.56865	1.53056	1.47145	1.44064	1.43367	1.40554	1.40431	1.43157	0.000425337	0.0127622	1.562	1.41381	1.44859	0.0286988	0.015395	0.0201089
A_44_P144964	5.71	5.67812	5.8602	5.78243	5.82304	5.69679	5.32852	5.49746	5.34689	0.00280178	0.0274637	5.74944	5.39096	5.76742	0.0972384	0.0926891	0.0644525
A_44_P145030	7.19653	7.93672	7.85594	6.15523	6.3998	6.49054	6.49226	6.18338	6.80124	0.00386697	0.0304955	7.66306	6.49229	6.34852	0.406045	0.308927	0.173439
A_44_P145137	4.71842	4.54336	4.67503	3.66252	3.42707	3.36602	4.01977	2.97754	3.16571	0.00670069	0.0373203	4.6456	3.38767	3.48521	0.0911638	0.55544	0.156564
A_44_P146552	2.93007	2.91737	2.52464	1.79755	1.23211	2.07333	1.83214	1.74546	1.82339	0.00584702	0.035208	2.79069	1.80033	1.701	0.230495	0.0477234	0.428843
A_44_P146588	2.29139	1.98581	2.06538	1.90026	1.72885	1.98959	1.62707	1.56298	1.48629	0.00491238	0.0329794	2.11419	1.55878	1.8729	0.158531	0.0704847	0.132504
A_44_P146616	11.2257	11.1713	11.1957	11.5682	11.4515	11.4643	11.546	11.416	11.3755	0.00296615	0.0278309	11.1976	11.4458	11.4947	0.0272812	0.0891001	0.063977
A_44_P147572	11.1094	12.1112	12.0555	9.6163	9.39403	8.39052	9.89103	10.8717	9.69611	0.00567215	0.0348339	11.7587	10.1529	9.13362	0.563017	0.630024	0.653062
A_44_P147693	6.58381	6.34106	6.64779	6.64027	6.60678	6.68835	7.57701	7.38847	7.57904	8.2303e-05	0.00758294	6.52422	7.51484	6.64514	0.161818	0.109446	0.0410021
A_44_P148161	6.46244	6.34392	6.67464	5.99932	5.83824	5.928	5.63177	5.86476	6.04061	0.00484587	0.0328325	6.49367	5.84571	5.92185	0.167558	0.205083	0.0807173
A_44_P148440	9.81121	9.93916	9.89678	9.47824	9.49124	9.40651	9.61545	9.57343	9.77423	0.00152442	0.0210575	9.88239	9.65437	9.45866	0.065179	0.105909	0.0456285
A_44_P149056	1.29843	1.82313	1.30037	2.44316	3.29557	2.49668	2.96762	2.84481	2.98527	0.00316809	0.0285451	1.47398	2.93256	2.74513	0.30238	0.076511	0.477442
A_44_P149188	17.5283	17.5283	17.4326	17.5791	17.7345	17.6229	17.7207	17.7503	17.832	0.00662034	0.037066	17.4964	17.7677	17.6455	0.0552518	0.0576816	0.080136
A_44_P149466	2.748	2.90383	2.99282	2.74014	3.2256	3.37822	4.01423	4.1522	4.13797	0.000858438	0.0170321	2.88155	4.10147	3.11465	0.123921	0.0758825	0.333195
A_44_P149510	1.9952	1.80808	1.83484	1.76691	1.63376	1.74498	1.58386	1.55397	1.53495	0.00494177	0.0330067	1.87937	1.55759	1.71521	0.101198	0.0246525	0.0713906
A_44_P149572	9.11893	9.2015	9.44354	8.6262	8.7726	8.76549	8.92506	8.69683	8.89963	0.00564763	0.0347261	9.25466	8.84051	8.72143	0.168707	0.125075	0.0825494
A_44_P149588	4.57423	4.78197	4.52226	4.29925	3.90119	4.08959	3.80925	3.93177	3.75529	0.00171692	0.0219617	4.62615	3.83211	4.09668	0.137423	0.0904324	0.199124
A_44_P149782	12.1125	11.8049	12.0834	12.4511	12.4224	12.5775	12.2425	12.295	12.125	0.00769592	0.0393081	12.0002	12.2208	12.4837	0.169813	0.0870678	0.0825257
A_44_P149870	6.15621	5.93415	5.82642	1.42208	1.43067	1.46479	1.38873	1.36907	1.61244	1.20741e-08	0.000139407	5.97226	1.45675	1.43918	0.168166	0.135195	0.0225893
A_44_P149954	6.50505	6.57373	6.5538	6.83655	6.90219	6.97595	6.71657	6.48753	6.53194	0.0033299	0.0290636	6.54419	6.57868	6.9049	0.0353299	0.121462	0.0697389
A_44_P150013	1.93834	1.79849	1.94945	1.66356	1.67533	1.53416	1.49431	1.42447	1.44431	0.000705801	0.0154143	1.89542	1.45437	1.62435	0.0841336	0.0359902	0.0783309
A_44_P150017	13.8899	14.3383	13.9925	12.412	12.465	12.5056	12.453	12.5044	12.9497	0.000150628	0.00935029	14.0735	12.6357	12.4608	0.234929	0.273194	0.0469292
A_44_P150233	3.58598	3.26689	3.55061	3.88631	3.6751	3.61977	2.58376	2.63094	2.70529	0.000148932	0.00934068	3.46783	2.64	3.72706	0.174911	0.0612661	0.140659
A_44_P150317	4.62788	4.22205	4.47109	4.40896	4.66778	4.45296	3.91521	3.18922	3.11915	0.00609299	0.0358907	4.44034	3.40786	4.5099	0.204651	0.440772	0.13849
A_44_P150650	1.62087	1.5806	1.56857	1.50144	1.4789	1.49236	1.43277	1.43248	1.46954	0.000418215	0.0127232	1.59001	1.44493	1.4909	0.0273906	0.0213116	0.0113402
A_44_P151156	15.1684	15.8183	15.713	16.5864	17.1923	16.4844	16.6136	17.5014	17.2607	0.00730973	0.0385727	15.5666	17.1253	16.7544	0.348818	0.459145	0.382715
A_44_P151702	5.9595	6.42244	5.25591	6.11382	4.83643	5.43388	2.63012	3.37353	3.58674	0.00266386	0.0269143	5.87928	3.19679	5.46138	0.587386	0.5022	0.639139
A_44_P151708	5.9638	7.05554	6.66551	4.30273	4.79528	3.57072	4.99425	5.62979	5.04589	0.00441078	0.031597	6.56162	5.22331	4.22291	0.553233	0.352966	0.616172
A_44_P151981	6.66089	6.75607	6.48944	7.21594	7.13072	6.92318	7.58915	7.45326	7.69947	0.000461546	0.0132783	6.63547	7.58063	7.08995	0.135119	0.123329	0.150581
A_44_P151982	12.1274	12.1071	11.9694	12.3064	12.302	12.4132	12.3538	12.3587	12.239	0.00673381	0.0373657	12.068	12.3172	12.3406	0.0859699	0.0677454	0.0629459
A_44_P152061	1.90433	1.73109	1.87244	1.68388	1.65955	1.65868	1.52897	1.49415	1.46303	0.00103635	0.0184569	1.83595	1.49538	1.66737	0.0922046	0.0329914	0.0143027
A_44_P152077	2.06519	1.85667	1.87664	1.78943	1.65631	1.76115	1.60165	1.55992	1.54243	0.00411076	0.0309449	1.93283	1.568	1.73563	0.115061	0.030427	0.0701351
A_44_P152085	1.89038	1.70728	1.78373	1.70069	1.61361	1.73912	1.54978	1.53516	1.50341	0.00788544	0.0394941	1.7938	1.52945	1.68448	0.0919603	0.0237062	0.064306
A_44_P152219	3.03037	2.95804	2.85323	1.50209	1.71599	1.47927	2.701	2.8888	2.77982	7.25943e-06	0.00286202	2.94721	2.78987	1.56578	0.089065	0.0943048	0.130582
A_44_P152247	4.13541	4.2881	4.22229	4.15348	3.36463	4.04945	3.09501	2.72343	3.18777	0.00551132	0.0345227	4.21526	3.00207	3.85585	0.0765844	0.245729	0.428578
A_44_P152335	13.6579	13.5448	13.5685	14.2341	14.1304	14.3383	14.28	14.2114	14.1431	9.35844e-05	0.00795467	13.5904	14.2115	14.2342	0.0596324	0.0684625	0.103938
A_44_P152373	6.60608	6.48576	6.61313	6.88226	7.524	7.03416	6.36541	6.42963	6.24327	0.00776477	0.0393766	6.56832	6.3461	7.14681	0.0715917	0.0946698	0.335373
A_44_P152495	2.3477	2.16031	2.67453	1.67139	2.56013	1.67498	3.63581	3.16368	3.54675	0.00623627	0.0362028	2.39418	3.44875	1.96883	0.260243	0.250862	0.512081
A_44_P152790	1.33957	1.33923	1.35369	1.31733	1.32006	1.32807	1.30259	1.28996	1.31294	0.00316804	0.0285451	1.34416	1.30183	1.32182	0.00825099	0.0115055	0.00557827
A_44_P153272	2.81882	2.81631	3.01544	3.07209	3.17239	3.12709	2.75964	2.65557	2.6783	0.0017049	0.0219617	2.88352	2.69784	3.12386	0.114247	0.0547147	0.0502273
A_44_P153371	5.9294	5.7075	5.11867	5.10186	4.69134	5.25882	4.28504	3.55123	3.7076	0.00328039	0.0288166	5.58519	3.84796	5.01734	0.418974	0.386516	0.293031
A_44_P153949	13.0764	13.0961	13.1956	12.7026	12.7796	12.757	12.9208	12.6453	12.8508	0.00541382	0.0344348	13.1227	12.8057	12.7464	0.0638808	0.143206	0.0395994
A_44_P154571	1.52561	1.50152	1.4776	1.4618	1.40639	1.40265	1.3626	1.35555	1.4084	0.00496191	0.0330067	1.50158	1.37552	1.42361	0.0240059	0.0286932	0.0331242
A_44_P154596	4.93314	4.7918	4.84711	4.46824	4.59752	4.2098	3.25515	3.78326	3.79745	0.00113228	0.0190044	4.85735	3.61195	4.42519	0.0712211	0.309082	0.197416
A_44_P154638	11.8334	11.5992	11.8313	11.4869	11.2418	11.4849	11.2191	10.9911	11.3147	0.00852674	0.0406416	11.7546	11.175	11.4045	0.134613	0.166273	0.140963
A_44_P154773	11.3296	11.0844	11.2897	11.6352	11.7226	11.7171	11.3762	11.3907	11.2548	0.00211375	0.0242666	11.2345	11.3406	11.6916	0.131574	0.0746457	0.0489864
A_44_P154785	10.4257	10.1715	10.4222	10.7599	10.803	10.852	10.5298	10.5127	10.3442	0.00430678	0.0314203	10.3398	10.4622	10.805	0.145782	0.102558	0.0460738
A_44_P155572	9.14381	9.0938	9.17395	9.26923	9.21401	9.2263	9.36031	9.32973	9.37992	0.000497895	0.0135271	9.13719	9.35665	9.23651	0.0404832	0.0252907	0.0289889
A_44_P155788	14.8921	14.9529	14.7996	14.6539	14.7566	14.602	14.4113	14.409	14.3281	0.000358998	0.0124518	14.8815	14.3828	14.6708	0.0771876	0.0473619	0.0786505
A_44_P155908	2.5644	2.4888	2.51642	2.69015	2.35061	2.45298	1.28203	1.93542	1.85309	0.00690683	0.0376502	2.52321	1.69018	2.49791	0.0382558	0.355857	0.174175
A_44_P156043	10.3599	10.2563	10.3037	10.5853	10.6076	10.6334	10.4283	10.3145	10.3215	0.000613663	0.0144733	10.3066	10.3548	10.6088	0.051889	0.0637974	0.0240661
A_44_P156197	1.6475	1.54023	1.59844	1.55725	1.5242	1.55115	1.47103	1.47016	1.46136	0.00872495	0.0410095	1.59539	1.46752	1.5442	0.0536994	0.00535212	0.0175841
A_44_P156521	9.91232	9.81189	9.95701	9.34387	9.3673	9.24522	9.40394	8.64593	8.91441	0.00799088	0.0397287	9.89374	8.98809	9.3188	0.0743214	0.384342	0.0647883
A_44_P156600	11.5599	11.5879	11.7053	11.2796	11.2779	11.3838	11.1907	11.1029	11.0416	0.000383499	0.0124518	11.6177	11.1117	11.3138	0.0771511	0.074932	0.0606549
A_44_P156697	1.86352	1.67782	1.78767	1.6749	1.61808	1.73694	1.53838	1.52189	1.48214	0.00792903	0.0395883	1.77634	1.51414	1.67664	0.0933701	0.028909	0.0594529
A_44_P156864	5.92713	6.70118	5.56194	6.21921	4.926	5.96965	3.94176	3.32524	4.3613	0.00892608	0.0415994	6.06342	3.8761	5.70495	0.581717	0.521141	0.686035
A_44_P157097	1.91871	1.72866	1.80449	1.71673	1.62431	1.76406	1.56106	1.53997	1.50638	0.00793761	0.0395954	1.81729	1.5358	1.7017	0.0956704	0.0275759	0.0710778
A_44_P157144	5.70278	5.43456	5.60267	5.11039	4.40731	4.88407	3.89871	4.76225	4.1575	0.00917872	0.0418767	5.58	4.27282	4.80059	0.135538	0.443168	0.358898
A_44_P157229	7.67566	8.58979	8.7025	5.51546	5.77179	6.29342	6.11174	5.95135	5.35218	0.000799567	0.0165166	8.32265	5.80509	5.86022	0.563139	0.400344	0.396444
A_44_P157835	1.20502	1.21642	1.20736	4.22773	3.74255	3.81763	4.08656	4.09765	3.39068	3.04144e-05	0.00517045	1.2096	3.85829	3.9293	0.00602018	0.405002	0.26116
A_44_P157954	1.74594	1.82871	1.71615	1.61288	1.55009	1.59294	1.56686	1.49868	1.48793	0.0015061	0.0209363	1.7636	1.51782	1.5853	0.0583219	0.0428041	0.0320843
A_44_P158420	10.9589	10.7688	10.8724	11.15	11.0698	11.0881	10.9014	10.8549	10.8824	0.0055792	0.0346536	10.8667	10.8796	11.1026	0.0952175	0.0233904	0.0420247
A_44_P158635	7.74186	7.79074	7.77607	7.92554	7.85661	8.02555	7.72065	7.67284	7.73577	0.00564453	0.0347213	7.76956	7.70975	7.9359	0.0250864	0.032851	0.0849427
A_44_P158675	5.51166	5.72532	5.9541	6.1871	6.05981	6.30885	5.49568	5.40216	5.54482	0.0036607	0.0300571	5.73036	5.48089	6.18525	0.221267	0.0724693	0.124527
A_44_P158957	1.24376	1.25145	1.24192	1.24937	1.22714	1.32137	2.44165	1.86316	1.73999	0.00782458	0.039445	1.24571	2.01493	1.26596	0.00505632	0.374645	0.0492539
A_44_P159500	9.37772	9.63858	9.27195	7.9309	7.89836	8.12142	8.35533	8.34057	8.11654	5.17441e-05	0.00624268	9.42942	8.27081	7.98356	0.188704	0.133809	0.120498
A_44_P160401	5.01569	5.13582	5.0975	5.00144	4.98829	5.20634	4.58501	4.46637	4.71266	0.00196652	0.0233974	5.083	4.58801	5.06536	0.0613616	0.123169	0.122274
A_44_P160697	10.3712	10.3392	10.427	9.76112	9.56804	9.69943	9.2019	9.22038	9.03195	7.26985e-06	0.00286202	10.3791	9.15141	9.6762	0.0444571	0.103864	0.0986158
A_44_P160785	4.78907	3.20366	3.86581	2.36059	3.4643	2.79164	1.56619	1.56361	1.61079	0.00606472	0.0358224	3.95285	1.58019	2.87218	0.79628	0.0265237	0.556245
A_44_P160997	1.83096	1.70554	1.715	1.67752	1.57071	1.60199	1.52105	1.51457	1.52662	0.00454301	0.0318778	1.7505	1.52075	1.61674	0.069841	0.00603094	0.0549122
A_44_P161332	6.90174	7.86986	7.08202	4.80716	4.8552	4.91534	5.73084	5.77937	4.40031	0.00335282	0.0291109	7.28454	5.3035	4.85923	0.514854	0.782568	0.0542019
A_44_P161596	5.69625	5.96227	5.55285	5.2899	4.82561	5.18849	4.85094	4.56281	4.02221	0.0069268	0.0376759	5.73712	4.47865	5.10133	0.207746	0.420729	0.244109
A_44_P161841	2.23966	1.9744	2.08579	1.81688	1.76011	1.80001	1.58289	1.51915	1.51379	0.00047546	0.0134207	2.09995	1.53861	1.79233	0.133194	0.0384413	0.0291524
A_44_P161846	3.46013	3.90226	3.78638	2.39769	3.12678	2.701	2.08633	2.69718	2.2717	0.00418962	0.0311989	3.71626	2.35173	2.74182	0.229256	0.313191	0.366259
A_44_P161905	3.40598	3.34346	3.27319	2.81085	2.61675	3.02192	1.97548	2.37252	2.2738	0.000586462	0.0142351	3.34087	2.20727	2.81651	0.0664321	0.206712	0.202645
A_44_P161917	1.43481	1.40228	1.43639	1.39627	1.40034	1.42457	1.36691	1.35329	1.34887	0.0037742	0.0303318	1.4245	1.35636	1.40706	0.0192522	0.0094003	0.0153007
A_44_P162268	1.87705	1.74866	1.74703	1.69604	1.5842	1.61778	1.53566	1.52218	1.5327	0.00316567	0.0285451	1.79091	1.53018	1.63267	0.0745985	0.00708464	0.0573868
A_44_P162441	2.22562	1.91783	1.99246	1.88005	1.69241	1.95674	1.61565	1.57558	1.48072	0.0097874	0.0430826	2.04531	1.55732	1.84306	0.160554	0.0692929	0.135992
A_44_P162536	2.28065	1.99226	2.0792	1.8637	1.76263	1.93461	1.64269	1.55881	1.53718	0.00220474	0.0247248	2.11737	1.57956	1.85364	0.147938	0.0557352	0.0864292
A_44_P162661	3.01041	2.54092	3.31438	2.62493	2.99243	2.26873	1.70619	1.8537	1.53143	0.00736098	0.0386607	2.95524	1.69711	2.6287	0.389666	0.161328	0.361861
A_44_P162975	2.18676	1.93834	1.96718	1.89289	1.63534	1.79972	1.53732	1.52461	1.6383	0.00746281	0.0387474	2.03076	1.56675	1.77598	0.135869	0.0622943	0.130409
A_44_P163048	3.69425	3.7472	3.67913	2.83393	2.81444	2.69075	2.55197	2.02495	1.59761	0.0010994	0.0189033	3.70686	2.05818	2.77971	0.0357437	0.478047	0.077653
A_44_P163301	1.34878	1.33878	1.33321	1.33278	2.22651	2.12539	3.07025	2.85765	3.19318	0.00120346	0.0193616	1.34026	3.04036	1.89489	0.0078923	0.169752	0.489424
A_44_P163645	7.74047	7.95248	7.93184	7.50663	7.50853	7.43806	7.49351	7.61913	7.70148	0.00578011	0.0350856	7.87493	7.60471	7.4844	0.1169	0.104732	0.040146
A_44_P163706	4.16154	5.77349	5.13177	2.22313	1.57474	3.02215	2.46485	3.65453	2.75435	0.00842156	0.040498	5.02226	2.95791	2.27334	0.811536	0.620411	0.725008
A_44_P163871	1.80527	1.65513	1.70598	1.65125	1.57115	1.62506	1.51635	1.51501	1.50144	0.00627851	0.0363493	1.72213	1.51094	1.61582	0.0763609	0.00824786	0.0408431
A_44_P163987	3.08339	2.79483	2.59547	2.6235	3.1133	2.83624	4.16063	3.78009	3.91032	0.0014688	0.0207491	2.82456	3.95035	2.85768	0.245316	0.193401	0.245598
A_44_P164188	9.42846	9.55565	9.24434	8.73193	8.72343	8.57897	8.94677	9.03284	8.93892	0.000483739	0.0135266	9.40948	8.97284	8.67811	0.156524	0.0521081	0.0859622
A_44_P164192	10.0245	10.1343	9.77335	9.11924	9.24683	9.10788	9.42116	9.22349	9.14639	0.000774717	0.0162549	9.97738	9.26368	9.15798	0.185017	0.141729	0.0771532
A_44_P164337	3.88763	4.29925	4.45421	4.46587	4.18085	4.33216	5.43257	5.55598	5.49842	0.000311199	0.0118912	4.2137	5.49566	4.3263	0.29282	0.0617513	0.142603
A_44_P164363	1.17242	1.18006	1.19894	1.17917	1.16862	1.20044	2.25847	1.58761	2.00367	0.00439462	0.031559	1.18381	1.94992	1.18274	0.0136498	0.338644	0.0162073
A_44_P164512	11.6773	12.7684	12.6069	9.702	10.0936	10.2514	10.3335	11.0809	11.2332	0.00252193	0.0263124	12.3509	10.8825	10.0157	0.588889	0.481551	0.282857
A_44_P164580	2.13709	1.94271	2.64945	1.98246	1.92945	2.71223	3.66964	3.31411	3.44963	0.00636182	0.0365431	2.24308	3.47779	2.20805	0.365097	0.179429	0.437441
A_44_P164972	3.68304	3.78791	4.05274	4.90433	5.50056	5.10095	4.6427	4.76523	4.43453	0.00116021	0.0190044	3.84123	4.61415	5.16861	0.190529	0.167186	0.303823
A_44_P164974	3.89309	3.48601	3.62593	4.62503	4.98668	4.65918	4.41561	4.41792	4.07293	0.00171906	0.0219617	3.66834	4.30215	4.75696	0.206828	0.198516	0.199672
A_44_P165258	3.88483	3.46013	3.71825	3.45908	2.64088	3.01721	2.33248	2.14864	2.06205	0.00170697	0.0219617	3.68774	2.18105	3.03905	0.213989	0.138097	0.409535
A_44_P165328	9.04428	9.30535	9.19996	9.09184	9.21291	9.17584	10.32	9.85179	9.74752	0.0034244	0.029324	9.1832	9.97309	9.16019	0.131341	0.304884	0.0620343
A_44_P165336	6.54761	6.88878	6.97283	7.12453	7.20582	6.95657	7.92153	7.66305	7.68718	0.00127756	0.0197035	6.80307	7.75725	7.09564	0.225197	0.142778	0.127111
A_44_P165588	5.76707	5.0986	4.6904	6.31973	6.69506	6.83484	6.64316	6.74783	6.35446	0.00486296	0.0328482	5.18536	6.58182	6.61654	0.543555	0.203733	0.266379
A_44_P165800	1.69428	1.62967	1.62398	1.57115	1.52646	1.53746	1.47698	1.47044	1.51402	0.00150067	0.0209226	1.64931	1.48715	1.54502	0.039053	0.0235001	0.0232846
A_44_P165833	6.23472	5.89108	6.07206	7.06969	7.41144	7.37892	8.13865	7.43274	7.97932	0.000420987	0.0127232	6.06595	7.85024	7.28668	0.171903	0.370234	0.188625
A_44_P165855	15.8847	15.7806	15.7201	16.1249	16.1673	16.1526	16.209	16.2286	16.3783	0.000511792	0.0136322	15.7952	16.272	16.1482	0.0832836	0.0925733	0.0215198
A_44_P165929	1.62063	1.52303	1.63257	1.53764	1.54504	1.57064	1.47055	1.44497	1.4172	0.0091539	0.0418505	1.59208	1.44424	1.55111	0.0600944	0.0266831	0.0173161
A_44_P165999	12.4546	12.2515	12.295	12.8205	12.6453	13.0024	12.7604	12.7099	12.7749	0.00544822	0.0344946	12.3337	12.7484	12.8227	0.106953	0.0341287	0.178539
A_44_P166161	9.44863	9.30218	8.40837	9.93854	10.5997	10.6802	10.3548	10.6147	10.5729	0.00819538	0.0401518	9.05306	10.5141	10.4062	0.563099	0.139577	0.40697
A_44_P166257	3.10021	2.87889	2.89925	2.08804	1.76423	1.65125	2.08226	1.67701	1.81296	0.000525943	0.0137075	2.95945	1.85741	1.83451	0.122329	0.206248	0.226718
A_44_P166372	2.52406	3.35901	2.69836	3.96046	3.73016	3.75091	3.89097	4.22675	4.03691	0.00463779	0.0322243	2.86048	4.05154	3.81384	0.440448	0.168371	0.127397
A_44_P166619	1.38492	1.37097	1.39417	1.35566	1.35812	1.36674	1.3338	1.32513	1.33233	0.000576332	0.0142042	1.38335	1.33042	1.36017	0.0116751	0.00464057	0.00582045
A_44_P166623	1.84007	1.65932	1.76781	1.65974	1.60924	1.71652	1.53074	1.51742	1.47665	0.0084098	0.040498	1.75573	1.50827	1.66183	0.0909772	0.028181	0.0536693
A_44_P166955	2.77546	2.86556	2.92975	1.21942	1.6317	1.21541	1.19967	1.72161	1.2365	0.000247762	0.0108378	2.85692	1.38592	1.35551	0.0775092	0.291292	0.239195
A_44_P167016	7.28946	7.29312	7.44518	7.00048	6.92742	7.27747	6.87045	6.70468	6.43592	0.00901389	0.041684	7.34259	6.67035	7.06846	0.0888699	0.21929	0.184656
A_44_P167109	4.61785	4.95477	4.64624	5.69709	5.46542	5.23204	6.27022	6.03736	6.34985	0.000282864	0.0115193	4.73962	6.21914	5.46485	0.186866	0.162383	0.232526
A_44_P167189	11.1644	10.7514	10.808	10.4327	10.3458	10.4604	10.0213	9.97762	10.1525	0.00100993	0.0182645	10.908	10.0505	10.413	0.223893	0.0910193	0.0597899
A_44_P167403	7.01522	6.81833	6.93045	6.6669	6.55121	6.58899	6.51561	6.3784	6.20315	0.00270591	0.0271863	6.92133	6.36572	6.60237	0.0987602	0.156614	0.05899
A_44_P168112	11.6352	11.7323	11.7307	11.9502	11.9909	11.9026	11.9128	11.9675	11.9257	0.000746831	0.0159381	11.6994	11.9354	11.9479	0.0556262	0.0285803	0.0442253
A_44_P168280	8.03022	7.24341	8.10893	6.59665	6.63443	6.26333	6.80274	6.47389	6.33069	0.00473211	0.0325205	7.79419	6.53577	6.49814	0.478607	0.242032	0.204223
A_44_P168405	8.62159	8.80984	8.74511	8.92724	8.81207	8.90783	9.19568	9.75779	9.68273	0.00389445	0.0305113	8.72551	9.5454	8.88238	0.0956392	0.305186	0.0616641
A_44_P168487	2.29085	2.00223	2.06778	1.91119	1.71106	1.92346	1.581	1.53729	1.48268	0.00233342	0.025345	2.12029	1.53365	1.84857	0.151305	0.0492636	0.119248
A_44_P168500	2.08473	1.88944	2.031	1.72387	1.71816	1.59454	1.51669	1.45372	1.47265	0.000405142	0.0126269	2.00172	1.48102	1.67886	0.100883	0.0323109	0.0730762
A_44_P168917	2.97841	3.99778	3.48808	3.32297	1.81321	2.44619	5.78697	4.48955	5.41892	0.00635294	0.0365431	3.48809	5.23182	2.52746	0.509685	0.668643	0.758154
A_44_P168941	7.47981	7.4553	7.36363	7.32073	7.18826	7.15634	7.17744	7.17854	7.06802	0.00626789	0.0363159	7.43291	7.14133	7.22178	0.061238	0.0634906	0.0871691
A_44_P169027	1.36486	1.36183	1.37589	1.34025	1.33878	1.33829	1.31544	1.30482	1.33547	0.00281759	0.0274637	1.36753	1.31858	1.33911	0.00739648	0.0155682	0.00102139
A_44_P169124	5.57802	5.99592	5.69398	4.43788	1.86296	2.66716	3.47886	3.16738	3.29078	0.00904174	0.0416911	5.75597	3.31234	2.98933	0.215735	0.156853	1.31734
A_44_P169224	3.85175	3.61495	3.95305	3.41895	2.57359	3.06434	2.27853	2.5439	2.0539	0.00250482	0.026241	3.80658	2.29211	3.01896	0.173516	0.245283	0.424507
A_44_P169307	5.55424	5.30067	5.3274	5.25854	5.21586	5.17306	4.59576	4.65897	4.88633	0.0012138	0.0194001	5.3941	4.71369	5.21582	0.139329	0.152818	0.04274
A_44_P169327	13.8371	14.0477	14.1431	13.6946	13.8982	13.6883	13.5337	13.445	13.3627	0.0042656	0.0313241	14.0093	13.4471	13.7604	0.156581	0.0854902	0.119382
A_44_P169882	4.90633	4.56093	4.86766	4.82437	4.70968	4.70349	4.08058	4.14259	4.42451	0.00781418	0.039445	4.7783	4.21589	4.74585	0.189241	0.18331	0.068073
A_44_P170368	6.79921	6.82698	6.77382	6.65783	6.9103	6.72334	6.40793	6.40088	6.4264	0.00154592	0.0211523	6.8	6.41174	6.76382	0.0265866	0.0131782	0.131011
A_44_P170573	1.45657	1.42684	1.45191	1.41888	1.407	1.40116	1.37198	1.36128	1.38902	0.00188367	0.0230414	1.44511	1.3741	1.40901	0.015988	0.0139902	0.00903068
A_44_P170710	9.63131	9.8971	9.93578	10.4174	10.2164	10.5074	11.1374	10.9797	10.4984	0.00426938	0.0313241	9.8214	10.8718	10.3804	0.165754	0.332862	0.149002
A_44_P170755	5.49177	5.31977	5.27248	5.06181	5.52956	5.47129	6.71205	6.18878	5.99618	0.00749161	0.0387533	5.36134	6.299	5.35422	0.115404	0.370444	0.254904
A_44_P170836	1.58958	1.54823	1.54243	1.51563	1.47557	1.50134	1.41555	1.41624	1.46851	0.00288208	0.0275709	1.56008	1.43344	1.49751	0.0257103	0.0303785	0.0203015
A_44_P170939	4.46496	4.65604	4.29887	4.19294	3.6886	4.04386	3.5965	3.28575	3.65511	0.00462434	0.0322215	4.47329	3.51245	3.97513	0.178731	0.198506	0.259099
A_44_P171081	2.15663	1.90336	1.94389	1.82902	1.69847	1.87664	1.63843	1.57937	1.54333	0.00638212	0.0365459	2.0013	1.58704	1.80138	0.136044	0.0480123	0.0922435
A_44_P171143	11.8642	12.1006	11.8558	12.5324	12.8537	12.5746	12.3042	12.2676	12.0447	0.00346171	0.02947	11.9402	12.2055	12.6536	0.138969	0.140449	0.174584
A_44_P171406	1.27151	1.2741	1.36929	2.15915	2.57875	2.22746	1.28639	1.28248	1.68496	0.00110029	0.0189033	1.30497	1.41794	2.32179	0.055723	0.231254	0.225141
A_44_P171506	11.5712	11.6559	11.8512	11.0455	11.0225	11.2339	11.0324	11.0685	10.5699	0.00550234	0.0345209	11.6927	10.8903	11.1006	0.143568	0.278004	0.116005
A_44_P171634	10.489	10.0108	10.5526	10.9574	11.0207	11.0067	11.1855	11.1505	11.0678	0.00336756	0.0291679	10.3508	11.1346	10.9949	0.296136	0.06048	0.0332575
A_44_P171708	6.25646	7.01723	6.81338	4.49833	4.52538	4.87462	5.14732	5.84858	5.89467	0.00115722	0.0190044	6.69569	5.63019	4.63278	0.393801	0.418812	0.209881
A_44_P171724	1.51656	1.46491	1.5234	1.47356	1.48347	1.51173	1.42447	1.40438	1.38441	0.00558086	0.0346536	1.50162	1.40442	1.48959	0.031979	0.0200296	0.0198084
A_44_P171973	2.39059	3.01841	2.29972	1.46799	1.42701	1.51465	1.47485	1.46377	1.39898	0.00142486	0.0204567	2.56957	1.44586	1.46989	0.39135	0.0409822	0.0438514
A_44_P172286	2.08983	1.87089	1.89106	1.79702	1.66198	1.76883	1.60889	1.56175	1.54367	0.00422144	0.0312571	1.95059	1.57144	1.74261	0.121004	0.0336715	0.0712331
A_44_P172901	1.37007	2.40496	1.33606	2.52787	1.69682	2.77775	3.27639	3.87903	4.01707	0.00906377	0.0416969	1.7037	3.72416	2.33415	0.607553	0.393881	0.565907
A_44_P172941	5.45835	5.54101	5.59478	5.369	5.43008	5.3835	5.14905	5.20254	5.13812	0.000244816	0.0107719	5.53138	5.16324	5.39419	0.0687209	0.0344779	0.0319166
A_44_P173112	7.27747	7.28815	7.32592	7.30941	7.28196	7.37405	7.13135	6.9117	6.87181	0.00437789	0.0314732	7.29718	6.97162	7.32181	0.0254549	0.139762	0.0472814
A_44_P173151	2.72142	2.81179	2.17796	2.75211	2.42013	2.25104	1.45122	1.37573	1.5745	0.00315534	0.0285047	2.57039	1.46715	2.47442	0.342845	0.10034	0.254911
A_44_P173601	1.63389	1.56994	1.58031	1.57195	1.51042	1.53522	1.4498	1.44995	1.50338	0.00831984	0.0402996	1.59472	1.46771	1.5392	0.0343223	0.0308892	0.0309602
A_44_P173640	1.80116	1.67456	1.69147	1.66437	1.56156	1.59534	1.51196	1.5105	1.51851	0.00642158	0.0366248	1.7224	1.51365	1.60709	0.0687308	0.00426609	0.0524043
A_44_P173657	7.47042	7.72411	7.75523	7.1725	7.16997	7.27337	7.4736	7.5475	7.35991	0.00773401	0.039337	7.64992	7.46034	7.20528	0.15623	0.0944937	0.0589825
A_44_P174338	4.12546	4.57498	4.66683	1.81959	3.10097	2.61851	3.25949	3.3308	3.37225	0.00340515	0.0292764	4.45575	3.32085	2.51302	0.289709	0.0570343	0.647167
A_44_P174374	13.1039	13.3939	13.333	13.6521	13.8473	13.6684	13.2439	13.1761	13.2387	0.00265211	0.0268622	13.2769	13.2195	13.7226	0.152946	0.0377557	0.108313
A_44_P174805	1.60768	1.56298	1.5617	1.52671	1.48957	1.51635	1.43084	1.43039	1.48336	0.00253942	0.0263634	1.57745	1.4482	1.51087	0.0261866	0.0304493	0.0191645
A_44_P174970	6.03931	5.68263	5.84958	5.73221	5.76797	5.74256	5.42311	5.3242	5.39137	0.00380425	0.0303606	5.85717	5.37956	5.74758	0.178461	0.0504979	0.0183993
A_44_P175041	9.59007	9.35064	9.85268	9.10656	9.02087	9.24553	8.80642	8.97051	8.66891	0.00534042	0.034274	9.5978	8.81528	9.12432	0.251107	0.150994	0.11338
A_44_P175094	2.21437	1.95028	2.06913	1.81754	1.75474	1.82516	1.58928	1.5269	1.51329	0.000674445	0.0150368	2.07792	1.54316	1.79915	0.132266	0.0405197	0.0386488
A_44_P175153	2.01446	1.78928	1.89339	1.76326	1.68088	1.86606	1.58795	1.54864	1.50682	0.00742593	0.0386945	1.89904	1.5478	1.77007	0.112696	0.0405726	0.0927786
A_44_P175482	6.66647	6.71987	6.64095	7.13573	7.37629	7.19307	7.02813	7.1877	7.32948	0.00186706	0.0229132	6.67576	7.18177	7.23503	0.0402724	0.150762	0.125649
A_44_P175646	1.58777	1.94625	2.21052	2.60765	2.80878	2.99892	2.78882	3.25627	2.83289	0.00537939	0.0344038	1.91484	2.95933	2.80512	0.312562	0.258104	0.195662
A_44_P175893	7.9212	8.2199	7.79719	7.73365	7.77106	7.7054	7.29235	7.37923	7.23476	0.00228502	0.0251154	7.97943	7.30211	7.7367	0.21729	0.072729	0.0329362
A_44_P177425	6.12338	6.05357	5.88992	6.45229	6.38691	6.45442	6.38976	6.46034	6.47222	0.000837718	0.0167903	6.02229	6.44077	6.43121	0.119833	0.0445783	0.0383782
A_44_P177465	2.85041	2.5791	2.27118	1.56899	1.51639	1.56601	1.48395	1.50918	1.82997	0.00136563	0.0200773	2.5669	1.6077	1.55047	0.28981	0.192904	0.0295476
A_44_P177595	1.37117	1.36179	1.36622	1.35501	1.33951	1.32536	1.51926	1.6945	1.60381	0.00131633	0.0198622	1.36639	1.60586	1.33996	0.00469105	0.087641	0.0148344
A_44_P177704	5.35532	5.27151	5.52358	5.23056	5.27766	5.34902	4.80611	4.99846	5.0108	0.00476844	0.0325778	5.38347	4.93846	5.28575	0.128368	0.114781	0.0596411
A_44_P177713	9.15367	8.99927	9.19373	9.67711	9.75001	9.46816	9.85453	9.6138	9.89144	0.00212908	0.0243414	9.11556	9.78659	9.63176	0.102682	0.150778	0.146296
A_44_P178154	1.50888	1.48119	1.46315	1.45464	1.4002	1.39767	1.35069	1.34261	1.40476	0.00848256	0.0405946	1.4844	1.36602	1.4175	0.0230337	0.0337912	0.0321833
A_44_P178213	4.83561	4.81597	5.24265	5.25232	5.07963	5.00508	5.53666	6.11895	5.8328	0.00781007	0.039445	4.96474	5.82947	5.11235	0.240874	0.291159	0.126827
A_44_P178417	4.02836	3.46974	3.66494	4.09724	4.72971	4.60102	5.32347	5.37721	5.5098	0.000643363	0.014605	3.72101	5.40349	4.47599	0.283499	0.0959029	0.33426
A_44_P178448	12.5746	12.0397	12.4148	13.2501	13.2107	12.8136	13.1773	12.9773	13.041	0.00930341	0.0421735	12.3431	13.0652	13.0914	0.274577	0.102138	0.241437
A_44_P178616	4.96389	4.48561	4.35015	4.90542	5.18594	4.98883	6.38548	6.378	5.75492	0.00148626	0.0208579	4.59988	6.1728	5.02673	0.322436	0.361913	0.144047
A_44_P179103	1.71904	1.63389	1.63336	1.61108	1.53561	1.55725	1.48385	1.48091	1.51723	0.00487837	0.0328794	1.6621	1.494	1.56798	0.0493152	0.0201754	0.0388624
A_44_P179282	10.9607	10.8174	11.3282	11.6293	11.7534	11.7083	11.6953	11.6846	11.3916	0.00979725	0.0430826	11.0354	11.5905	11.697	0.263457	0.172313	0.0628537
A_44_P179561	2.62091	2.44114	2.77775	1.47931	1.38763	1.4069	1.86575	1.97969	2.26001	0.000256083	0.0109675	2.61327	2.03515	1.42461	0.168436	0.202894	0.0483382
A_44_P179613	3.71402	3.30109	2.90167	3.2713	2.52485	2.70739	1.83987	1.69158	1.58608	0.00280022	0.0274637	3.30559	1.70584	2.83451	0.406197	0.127492	0.389123
A_44_P179767	3.23772	3.1086	3.26301	4.55025	4.25589	4.08445	3.47778	3.51311	3.4643	0.000228526	0.0104448	3.20311	3.48506	4.29686	0.0828202	0.0252061	0.23559
A_44_P179881	2.22117	1.94508	2.00624	1.85447	1.73434	1.95214	1.66216	1.58476	1.54231	0.00647581	0.0367492	2.0575	1.59641	1.84698	0.145005	0.0607713	0.109094
A_44_P179956	10.5499	10.9498	10.6641	9.6255	9.80312	9.85121	10.139	10.0667	9.50615	0.00579321	0.0351018	10.7213	9.90393	9.75994	0.205988	0.346379	0.118886
A_44_P180138	11.8848	12.0756	12.1931	12.5688	12.2887	12.4607	12.5855	12.7416	12.7604	0.00301732	0.0279672	12.0512	12.6958	12.4394	0.155591	0.0960244	0.14125
A_44_P180147	4.9382	5.45512	5.1148	4.47761	4.46921	4.39708	4.52188	4.57779	4.46475	0.00249504	0.0261768	5.16937	4.52147	4.44797	0.262745	0.0565184	0.0442716
A_44_P180255	8.14018	8.00809	8.0642	8.44317	8.27456	8.48153	8.19171	8.04346	8.18164	0.00866942	0.0408878	8.07082	8.13894	8.39976	0.0662956	0.0828366	0.110105
A_44_P180262	12.9042	12.7805	12.7989	13.0092	13.0467	12.9389	13.0245	13.0004	13.0004	0.00780273	0.039445	12.8278	13.0084	12.9983	0.0667193	0.0139211	0.0547211
A_44_P180334	13.2374	13.2284	13.2228	13.1197	13.0816	13.0741	13.113	13.0394	12.9514	0.00718087	0.0381755	13.2295	13.0346	13.0918	0.00737113	0.0809111	0.0244637
A_44_P180431	6.988	8.49119	7.86559	5.06599	4.25972	4.75852	5.60106	5.37826	5.61764	0.000722589	0.0155987	7.78159	5.53232	4.69475	0.755106	0.133675	0.406904
A_44_P180519	6.68091	6.65392	6.42188	6.61149	6.23927	6.63947	7.57933	7.5338	7.40229	0.000466789	0.0133266	6.58557	7.50514	6.49674	0.142401	0.0919311	0.223417
A_44_P180576	2.54898	3.00042	3.45299	2.84445	1.9744	2.60555	4.37306	4.57665	4.31637	0.00183993	0.0227196	3.0008	4.42203	2.4748	0.452005	0.136872	0.44952
A_44_P180586	2.19825	1.9228	1.99159	1.84702	1.72807	1.95959	1.6586	1.58694	1.54005	0.00832949	0.0402996	2.03755	1.59519	1.84489	0.143358	0.0597026	0.115774
A_44_P180627	6.58928	6.21169	6.32863	6.30567	6.46857	6.5293	6.82017	7.30197	7.39433	0.00777082	0.0393806	6.37653	7.17216	6.43451	0.193297	0.308305	0.115639
A_44_P180645	5.63022	5.67385	5.27708	6.10641	6.18859	6.30602	6.0706	5.87691	5.71193	0.00904852	0.0416911	5.52705	5.88648	6.20034	0.217577	0.179526	0.100324
A_44_P180811	1.56927	1.50298	1.55593	1.51487	1.49946	1.53152	1.44651	1.44053	1.43253	0.00357208	0.0297375	1.54273	1.43986	1.51528	0.035066	0.00701636	0.0160376
A_44_P180845	1.99929	1.79078	1.85113	1.7681	1.65016	1.81849	1.58847	1.55917	1.52371	0.00824576	0.0401902	1.8804	1.55712	1.74558	0.107292	0.032431	0.0863944
A_44_P180899	1.54606	2.15985	2.53155	2.18676	1.66794	2.24918	4.68948	3.63818	3.26997	0.00982019	0.043119	2.07915	3.86588	2.03463	0.497676	0.736641	0.319089
A_44_P181145	4.94423	4.86981	5.12577	4.42481	4.80506	4.25063	4.00067	4.04965	3.86679	0.00185411	0.0227917	4.97994	3.97237	4.4935	0.131662	0.0946539	0.283525
A_44_P181350	2.24861	1.96327	2.03154	1.86436	1.74458	2.00562	3.5475	3.09244	4.29482	0.00202227	0.0237653	2.08114	3.64492	1.87152	0.148997	0.607083	0.130665
A_44_P181511	8.82804	8.6369	8.90113	8.92268	8.73598	8.7149	8.14072	8.19809	8.45811	0.00582184	0.0351739	8.78869	8.26564	8.79119	0.136437	0.169133	0.114363
A_44_P182296	1.45554	1.24985	1.24619	2.54687	2.69939	3.75846	2.12716	2.4335	1.81733	0.00845775	0.0405798	1.31719	2.126	3.00157	0.119825	0.308088	0.659909
A_44_P182463	1.52332	1.47284	1.51727	1.47886	1.47278	1.50288	1.4233	1.41252	1.40827	0.00264763	0.0268446	1.50448	1.4147	1.48484	0.0275617	0.0077487	0.0159139
A_44_P182494	4.12931	3.48496	4.19617	4.07539	3.85059	4.14796	5.20833	5.15357	5.25743	0.00123005	0.0195207	3.93681	5.20644	4.02464	0.392744	0.0519514	0.155041
A_44_P182624	1.81974	1.67797	1.70942	1.67255	1.57145	1.61503	1.51882	1.51639	1.51487	0.00622307	0.0361924	1.73571	1.51669	1.61968	0.0744523	0.00198971	0.0507098
A_44_P182810	9.76351	9.65935	9.52257	10.0591	10.1125	9.98824	10.0779	9.90184	9.92382	0.00479098	0.0326541	9.64848	9.96787	10.0533	0.120839	0.0959568	0.0623352
A_44_P182959	2.77883	2.29161	2.53657	1.28743	1.87189	1.36266	2.60832	3.37764	3.38492	0.00350489	0.0295535	2.53567	3.12363	1.50732	0.243613	0.446283	0.317956
A_44_P183039	6.00111	6.22831	5.83302	6.55282	6.52993	6.49371	6.48913	6.38327	6.29851	0.00733089	0.0385916	6.02081	6.3903	6.52548	0.19838	0.0955009	0.0298077
A_44_P183290	5.6251	5.83196	5.53746	5.61655	5.71526	5.53444	6.24408	6.48576	6.4539	0.000487281	0.0135271	5.66484	6.39458	5.62209	0.151219	0.131304	0.0905361
A_44_P183433	1.87345	1.68461	1.79755	1.68088	1.62295	1.74241	1.54084	1.52266	1.48314	0.00743297	0.0387042	1.78521	1.51555	1.68208	0.0950224	0.0295005	0.0597364
A_44_P183835	1.7879	1.65192	1.65592	1.7198	2.70159	1.53825	3.45944	3.0606	3.32794	0.0049549	0.0330067	1.69858	3.28266	1.98655	0.0773808	0.203235	0.625867
A_44_P183897	5.97938	6.09969	6.03367	6.52797	6.42188	6.50879	6.34943	6.46551	6.17563	0.00358229	0.0297646	6.03758	6.33019	6.48621	0.0602541	0.145899	0.0565304
A_44_P184163	2.12409	1.86901	1.99289	1.80319	1.72927	1.87362	1.59933	1.54217	1.50995	0.00252541	0.0263276	1.99533	1.55048	1.80203	0.127561	0.0452641	0.0721829
A_44_P184297	1.75836	1.6272	1.66088	1.62741	1.5503	1.58467	1.50023	1.50152	1.4989	0.0077678	0.0393786	1.68215	1.50022	1.58746	0.0681156	0.00130748	0.038633
A_44_P184420	1.84627	2.94478	3.19904	2.66574	2.07333	2.9583	4.81738	4.28132	4.73944	0.00468955	0.0323949	2.66336	4.61271	2.56579	0.718953	0.289631	0.450871
A_44_P184465	12.6773	12.6664	12.7458	12.4047	12.5202	12.5026	12.4829	12.4404	12.2763	0.0078068	0.039445	12.6965	12.3999	12.4759	0.0430402	0.109112	0.062203
A_44_P184505	3.38307	3.69482	3.48918	4.37972	3.46501	4.22187	5.14785	4.69205	4.66578	0.0084948	0.0405946	3.52236	4.83523	4.0222	0.158497	0.271059	0.488952
A_44_P184887	1.63158	1.61054	1.58982	1.48148	1.48749	1.48047	1.45172	1.44434	1.4864	0.000100201	0.0081913	1.61065	1.46082	1.48315	0.0208794	0.0224593	0.00379349
A_44_P185355	4.30755	4.23923	3.90911	1.38417	1.32207	1.33255	1.3157	1.31316	1.33585	1.99272e-07	0.000372639	4.15196	1.32157	1.34626	0.213075	0.0124314	0.0332411
A_44_P185390	1.57591	1.5483	1.52093	1.48115	1.44023	1.44339	1.39826	1.39388	1.43263	0.00104454	0.0185365	1.54838	1.40825	1.45492	0.0274907	0.0212241	0.0227713
A_44_P185878	5.18655	5.49746	5.52616	4.78538	4.91787	4.93341	4.63441	4.73058	4.89372	0.00288576	0.0275709	5.40339	4.7529	4.87889	0.188336	0.131087	0.0813509
A_44_P186185	6.46369	6.42963	6.74783	5.09156	5.29726	5.45033	5.67943	6.00634	5.8248	0.000329013	0.0120401	6.54705	5.83686	5.27971	0.174714	0.163788	0.180027
A_44_P186249	5.25375	5.23768	5.32069	5.26161	5.41373	5.19314	4.98416	5.01749	4.7706	0.00854	0.0406661	5.27071	4.92409	5.28949	0.0440259	0.133959	0.112906
A_44_P186902	8.27932	8.29762	8.63116	9.29537	9.20673	9.47824	9.15103	9.1287	8.93934	0.000861945	0.0170428	8.4027	9.07302	9.32678	0.19806	0.116307	0.13845
A_44_P186919	5.09954	4.97976	5.17788	5.17043	5.26137	5.28099	6.13754	5.93603	6.13433	2.93104e-05	0.00517045	5.08572	6.0693	5.2376	0.0997782	0.115425	0.0589896
A_44_P186979	2.07681	1.83347	1.93423	1.90639	1.70349	1.91306	1.6102	1.5605	1.51635	0.00906247	0.0416969	1.94817	1.56235	1.84098	0.122268	0.0469501	0.119119
A_44_P187080	13.202	13.2647	13.2177	13.4613	13.6521	13.4141	13.6866	13.5711	13.6192	0.00271799	0.0272266	13.2281	13.6256	13.5092	0.032605	0.0580388	0.126039
A_44_P187166	12.7168	12.4416	13.1494	13.3658	13.4863	13.3267	14.0767	14.0405	13.7234	0.00284953	0.0275429	12.7693	13.9469	13.393	0.356789	0.194403	0.0831706
A_44_P187167	6.09446	6.44782	6.85683	6.63862	6.63772	6.84989	7.47945	7.39233	7.37579	0.00613374	0.0359987	6.46637	7.41585	6.70875	0.38152	0.0556917	0.122234
A_44_P187249	4.11887	4.90283	5.04773	2.57554	2.49872	3.33165	2.90872	3.40246	3.15222	0.0032024	0.0286544	4.68981	3.15447	2.80197	0.499726	0.246879	0.460321
A_44_P187379	2.04936	1.81568	1.90896	1.78502	1.68896	1.89556	1.6024	1.56025	1.51591	0.00863141	0.0408179	1.92467	1.55952	1.78985	0.117629	0.0432509	0.103383
A_44_P187403	4.62631	4.52319	4.35043	4.7534	4.78719	4.64067	4.37259	4.33689	4.24915	0.00686256	0.0376322	4.49998	4.31954	4.72708	0.1394	0.0635223	0.0767235
A_44_P187640	5.6571	5.41191	5.25211	6.38647	6.25588	6.26996	6.18588	5.94501	6.1159	0.000811729	0.0166075	5.44037	6.08227	6.3041	0.203987	0.123908	0.0716803
A_44_P188729	17.6365	17.6365	17.6229	17.5582	17.6585	17.6585	17.4174	17.3769	17.5283	0.00969201	0.0429226	17.632	17.4409	17.6251	0.00786928	0.078361	0.0578759
A_44_P188983	8.93508	8.91576	8.91354	9.46816	9.17493	9.44657	8.91878	8.96816	9.02971	0.00310279	0.0283381	8.92146	8.97222	9.36322	0.0118491	0.0555755	0.163421
A_44_P189007	2.6235	2.35493	2.61119	2.49912	2.76194	2.61231	2.13932	1.87411	1.6475	0.00516686	0.0336949	2.52988	1.88698	2.62446	0.15163	0.246164	0.131834
A_44_P189026	5.74009	5.93169	5.99071	6.36367	6.39153	6.42124	6.30037	6.09157	6.45229	0.00730023	0.0385498	5.8875	6.28141	6.39215	0.131024	0.181105	0.0287881
A_44_P189329	4.45151	4.30892	4.61043	3.78212	3.52422	3.92999	1.71673	1.41607	2.63557	0.00058775	0.0142351	4.45695	1.92279	3.74544	0.15083	0.635325	0.205356
A_44_P189343	6.22165	6.55559	6.23994	5.98965	5.50368	5.68745	5.58896	4.73731	4.77911	0.00841137	0.040498	6.33906	5.03513	5.72693	0.187743	0.480093	0.245378
A_44_P189393	1.18902	1.20132	1.18923	1.20096	3.31876	1.23365	4.95451	4.95327	4.30732	0.00234214	0.0253718	1.19319	4.73837	1.91779	0.00704156	0.373299	1.21339
A_44_P189428	5.08841	5.39914	5.36145	6.07108	5.39022	5.95457	4.35712	3.75581	3.15429	0.00236471	0.0254504	5.283	3.75574	5.80529	0.169568	0.601413	0.364152
A_44_P189730	4.00524	4.77504	4.12977	5.73031	5.29334	5.61142	6.13612	6.70998	5.79052	0.00243289	0.0259046	4.30335	6.21221	5.54502	0.413215	0.464433	0.225923
A_44_P189879	5.02505	4.93677	5.40429	5.34879	4.72547	5.27876	6.25193	6.38277	6.09355	0.00254145	0.0263643	5.12204	6.24275	5.11767	0.248391	0.144827	0.341456
A_44_P190139	2.09902	1.85705	1.98754	1.78809	1.72387	1.82913	1.58634	1.53286	1.50314	0.00158724	0.0213343	1.9812	1.54078	1.78037	0.121112	0.0421601	0.0530554
A_44_P190541	4.27298	4.2539	4.18662	4.41209	3.47635	3.83391	3.16479	3.24026	3.21905	0.00987343	0.0431977	4.23783	3.20803	3.90745	0.045366	0.0389216	0.472184
A_44_P190898	4.31383	3.94674	3.91914	4.54001	4.31461	4.58791	3.85578	3.46212	3.58598	0.00495339	0.0330067	4.0599	3.63463	4.48084	0.22034	0.201286	0.145938
A_44_P190918	4.53255	4.18811	4.61926	4.94016	4.60213	4.77728	4.00769	3.8567	4.0656	0.00416433	0.031118	4.44664	3.97666	4.77319	0.228055	0.10785	0.169052
A_44_P191692	1.45146	1.42864	1.43859	1.43344	1.40228	1.38529	3.49621	2.94509	2.4312	0.00125165	0.0195942	1.43956	2.9575	1.407	0.0114433	0.532614	0.0244231
A_44_P191822	6.83588	7.45611	6.90777	5.70383	5.76316	5.76269	5.25953	6.12998	5.57212	0.00286223	0.0275575	7.06659	5.65387	5.74323	0.339248	0.440945	0.0341194
A_44_P191862	8.98872	8.78808	9.12229	9.41769	9.46153	9.39535	9.44091	9.32155	9.26441	0.00519847	0.0337763	8.96636	9.34229	9.42485	0.168221	0.0900589	0.033666
A_44_P191941	8.79201	9.13045	9.47705	8.70504	8.57173	8.79814	8.22602	8.35115	8.2636	0.00771328	0.0393081	9.13317	8.28026	8.69163	0.342531	0.0642084	0.113796
A_44_P192117	6.69938	6.76011	6.69348	7.48186	7.37193	7.46164	7.5333	7.36842	7.78611	0.000386131	0.0124763	6.71766	7.56261	7.43848	0.0368816	0.210383	0.0585104
A_44_P192209	1.55002	1.51723	1.50987	1.49811	1.45223	1.4735	1.39013	1.38435	1.44798	0.00527207	0.0340588	1.52571	1.40749	1.47461	0.0213729	0.0351893	0.0229607
A_44_P192325	4.56213	4.70224	4.50768	4.22403	4.38616	4.20762	5.20788	5.58157	5.1066	0.000742249	0.0158629	4.59068	5.29868	4.2726	0.100372	0.250166	0.0986859
A_44_P192568	11.1557	11.2455	11.1587	11.0067	10.9651	10.9431	10.9088	10.9073	10.9983	0.00113922	0.0190044	11.1866	10.9381	10.9716	0.0510088	0.0521352	0.0322783
A_44_P192801	5.14954	5.62093	5.76417	4.39032	4.38326	4.52037	4.30732	4.73494	4.13429	0.00303528	0.0280122	5.51154	4.39218	4.43131	0.321586	0.309185	0.0772037
A_44_P193545	9.39575	9.44963	9.44863	9.71744	9.67575	9.72706	9.49232	9.35352	9.58303	0.00652856	0.0368556	9.43134	9.47629	9.70675	0.030823	0.115588	0.0272747
A_44_P193764	1.93542	1.74989	1.80828	1.73183	1.62482	1.75504	1.56675	1.54488	1.51675	0.00658161	0.0369861	1.8312	1.54279	1.7039	0.0948669	0.0250646	0.0694596
A_44_P194068	2.18453	1.90896	1.98895	1.84177	1.72966	1.97313	1.65117	1.58249	1.5343	0.00909164	0.041779	2.02748	1.58932	1.84819	0.141765	0.0587327	0.121861
A_44_P194439	6.44719	6.33652	6.19002	6.01283	6.16574	5.97048	5.70404	5.52252	5.72778	0.00111826	0.0190044	6.32458	5.65145	6.04968	0.129	0.112281	0.102716
A_44_P194567	2.06973	1.85128	1.88352	1.79923	1.66286	1.80644	1.60966	1.56646	1.54044	0.00584382	0.035208	1.93484	1.57219	1.75618	0.117921	0.0349627	0.0808958
A_44_P194606	3.58852	4.08243	3.6042	3.99922	3.89993	3.77894	4.82128	4.75086	5.70235	0.00655382	0.0369007	3.75838	5.0915	3.89269	0.280739	0.530185	0.110317
A_44_P194748	1.69706	1.63344	1.62603	1.56956	1.52662	1.53504	1.47771	1.47065	1.51436	0.00132608	0.0199379	1.65218	1.48757	1.54374	0.0390427	0.0234632	0.0227521
A_44_P194768	8.20465	8.12688	8.36145	7.66954	7.5159	7.74282	7.44542	7.78365	7.8386	0.00637268	0.0365459	8.23099	7.68922	7.64275	0.119483	0.212923	0.115808
A_44_P194821	7.66149	7.70374	7.37012	7.39233	7.40876	7.3505	7.0336	7.0364	7.07343	0.00258579	0.026489	7.57845	7.04781	7.38386	0.181651	0.0222302	0.0300384
A_44_P194849	1.8535	1.71673	1.87394	1.63423	1.64371	1.54367	1.4955	1.43658	1.43516	0.00118792	0.01924	1.81472	1.45575	1.6072	0.0854757	0.0344302	0.0552259
A_44_P194939	10.3701	10.7899	11.1534	11.5642	11.1976	10.476	7.66246	8.40477	7.14049	0.000470562	0.0133638	10.7711	7.73591	11.0793	0.392013	0.635334	0.55368
A_44_P195494	1.56579	1.52911	1.52189	1.50596	1.46126	1.48502	1.39922	1.39593	1.45599	0.00442043	0.031597	1.53893	1.41705	1.48408	0.0235425	0.0337693	0.0223646
A_44_P195511	11.4437	11.4093	11.366	10.8185	10.8844	11.0247	10.6617	10.6989	10.7256	3.60799e-05	0.00574208	11.4063	10.6954	10.9092	0.0389222	0.032098	0.105331
A_44_P195648	10.8132	10.7981	10.7509	10.9029	10.8004	10.8819	10.9744	10.9699	10.9281	0.00539539	0.0344038	10.7874	10.9575	10.8617	0.0325371	0.0255381	0.054099
A_44_P195742	1.71872	1.62516	1.63137	1.62043	1.53596	1.55696	1.48399	1.48278	1.51369	0.00752442	0.0388156	1.65841	1.49349	1.57112	0.0523155	0.0175034	0.0439786
A_44_P196172	10.0569	11.3755	10.5776	6.08375	6.36203	7.78037	7.03755	6.80084	6.99936	0.000522654	0.0137026	10.67	6.94592	6.74205	0.664131	0.127079	0.909915
A_44_P196736	1.80281	1.63323	1.76011	1.62881	1.60547	1.66343	1.51586	1.49704	1.45516	0.00553313	0.0345618	1.73205	1.48935	1.63257	0.0882022	0.0310681	0.0291642
A_44_P196779	7.99994	8.25412	8.27541	7.58099	7.36679	7.65129	7.81957	7.81109	7.4553	0.00910751	0.0417995	8.17649	7.69532	7.53302	0.153267	0.207909	0.148194
A_44_P196849	2.24997	1.96937	2.07658	1.84209	1.76165	1.90259	1.61938	1.54463	1.52456	0.00145909	0.0207056	2.09864	1.56285	1.83544	0.141598	0.0499713	0.0707035
A_44_P196894	1.52863	2.09848	1.50535	2.18749	1.46226	2.06342	3.16544	2.81706	2.98467	0.00499755	0.0330665	1.71082	2.98906	1.90439	0.335924	0.174233	0.387885
A_44_P197041	8.80576	8.64551	8.60073	8.19809	8.25293	8.29303	8.33195	8.45008	8.19639	0.00380941	0.0303606	8.684	8.32614	8.24802	0.107797	0.126946	0.0476597
A_44_P197124	6.99978	7.0842	7.00953	7.15604	6.98587	6.84003	6.39494	6.44755	5.79284	0.00786791	0.0394847	7.03117	6.21177	6.99398	0.0461816	0.363762	0.158161
A_44_P197193	1.297	1.29843	1.29829	1.52449	1.91679	1.32503	2.78927	3.34381	3.3112	0.000209394	0.0104278	1.29791	3.14809	1.58877	0.000786751	0.311175	0.301073
A_44_P197816	3.22287	3.14855	3.39898	2.09627	2.4824	2.04257	1.45186	1.50608	1.94739	0.00031393	0.0118912	3.2568	1.63511	2.20708	0.12862	0.271796	0.239941
A_44_P197835	2.04998	1.84503	1.86687	1.78574	1.64999	1.75803	1.59771	1.5591	1.54102	0.00447962	0.0317573	1.92062	1.56594	1.73125	0.112554	0.0289572	0.0717258
A_44_P198457	5.41659	4.99094	5.06358	5.31312	5.44754	5.29652	4.84234	4.70301	4.72772	0.00674848	0.0373752	5.15703	4.75769	5.35239	0.227695	0.0743418	0.082817
A_44_P198476	1.62835	1.60688	1.58644	1.47734	1.48332	1.47718	1.44757	1.44283	1.47927	6.83508e-05	0.00709039	1.60722	1.45656	1.47928	0.0209552	0.0198092	0.00349882
A_44_P198620	7.352	7.24391	7.41276	7.49898	7.60005	7.51761	7.94558	8.11713	8.00163	9.63296e-05	0.00802403	7.33622	8.02144	7.53888	0.0855231	0.0874757	0.053787
A_44_P198648	1.50464	1.47145	1.49159	1.47428	1.44357	1.43987	1.4002	1.39232	1.43355	0.00644397	0.0367027	1.48923	1.40869	1.45258	0.0167175	0.0218851	0.0188891
A_44_P198669	4.70015	4.53304	4.41342	5.05947	5.12603	5.18821	5.03814	5.16855	5.25615	0.000872795	0.0171127	4.54887	5.15428	5.12457	0.144017	0.109703	0.064384
A_44_P198926	7.29716	6.79454	6.77545	7.0872	6.78881	7.16959	8.35579	8.37996	7.70374	0.00483348	0.0327854	6.95572	8.14649	7.0152	0.295848	0.38363	0.200341
A_44_P199107	1.52578	1.48524	1.51203	1.48994	1.46261	1.47099	1.41708	1.4115	1.43445	0.00162488	0.0215498	1.50769	1.42101	1.47451	0.0206185	0.0119708	0.0139999
A_44_P199187	12.6178	13.1761	12.9125	9.94465	10.2011	10.4039	10.9839	11.1644	11.6635	8.17225e-05	0.00758294	12.9021	11.2706	10.1832	0.279254	0.352027	0.230145
A_44_P199392	1.30562	1.31223	1.31361	1.29066	1.28528	1.27109	2.75488	1.96578	2.50885	0.00157076	0.021239	1.31049	2.40983	1.28234	0.00427066	0.403759	0.0101093
A_44_P199524	9.3829	9.44707	9.46412	9.70247	9.75151	9.65049	9.61726	9.67844	9.72706	0.00101514	0.0182855	9.43136	9.67425	9.70149	0.0428291	0.0550204	0.0505181
A_44_P199806	6.84487	6.6863	6.42533	6.28462	5.83994	5.93169	5.86455	5.72039	5.86295	0.00392023	0.0305339	6.65217	5.81596	6.01875	0.211844	0.0827716	0.234777
A_44_P200065	15.0743	15.1009	15.1159	15.6612	15.5644	15.6187	15.5751	15.6461	15.7331	2.82643e-05	0.00517045	15.0971	15.6514	15.6148	0.0210573	0.079107	0.0485579
A_44_P200617	4.45327	4.18042	4.14796	4.92719	5.03909	4.72547	4.83796	4.56544	4.63382	0.00681652	0.0376117	4.26055	4.67907	4.89725	0.16769	0.141783	0.158936
A_44_P200647	8.88115	9.48023	9.25289	7.45759	7.37509	7.84509	7.61313	7.83731	7.38649	0.000382152	0.0124518	9.20476	7.61231	7.55926	0.30243	0.225414	0.250956
A_44_P200720	1.56216	1.52727	1.51607	1.49907	1.45383	1.47402	1.39527	1.39051	1.44824	0.00375974	0.0303318	1.53517	1.41134	1.47564	0.0240386	0.0320457	0.0226643
A_44_P201016	1.55833	1.52388	1.51527	1.50113	1.45582	1.47784	1.39465	1.38971	1.45095	0.00461181	0.0322095	1.53249	1.41177	1.47826	0.0227852	0.0340229	0.0226589
A_44_P201371	1.67149	1.55785	1.61164	1.57432	1.52915	1.55425	1.47665	1.47688	1.47224	0.00877554	0.0411414	1.61366	1.47526	1.55257	0.0568448	0.00261396	0.0226339
A_44_P201863	3.40385	2.85721	3.65904	1.4254	1.39709	2.32049	1.41956	1.34249	1.57751	0.00225576	0.025036	3.3067	1.44652	1.71433	0.409648	0.119805	0.525144
A_44_P201909	1.40327	2.81444	2.55837	3.24646	2.54282	2.98095	5.36959	5.36809	4.15538	0.0045284	0.0318381	2.25869	4.96435	2.92341	0.751805	0.700589	0.35533
A_44_P202075	1.66807	1.62354	1.6133	1.53095	1.51302	1.51402	1.4693	1.45996	1.50653	0.00039017	0.0125043	1.63497	1.4786	1.51933	0.0291172	0.0246377	0.0100727
A_44_P202424	1.7898	1.64602	1.68799	1.64298	1.56271	1.60943	1.51017	1.51083	1.50119	0.00696277	0.0377676	1.70794	1.5074	1.60504	0.0739342	0.00538752	0.0403142
A_44_P202954	3.21689	2.10351	2.57204	3.06186	3.02606	3.08898	1.51867	1.69863	1.47744	0.00376988	0.0303318	2.63082	1.56491	3.05897	0.559012	0.11762	0.0315576
A_44_P203106	7.9479	8.11176	7.66545	9.12194	8.72885	8.76004	9.04273	9.24825	9.02811	0.000639057	0.014605	7.90837	9.10636	8.87028	0.225763	0.123095	0.218507
A_44_P203349	3.5802	3.57878	2.78052	4.39936	4.73396	4.54336	3.92193	4.15937	3.60279	0.00991758	0.0432809	3.31316	3.8947	4.5589	0.461285	0.279286	0.167841
A_44_P203421	8.25004	8.52147	8.3847	8.47525	8.53355	8.49567	8.78207	8.97703	9.3116	0.00899417	0.0416443	8.3854	9.02356	8.50149	0.135715	0.267813	0.0295821
A_44_P203665	7.16366	6.94677	6.7931	5.73604	5.77581	6.2435	6.1383	6.52426	6.16644	0.00396891	0.0305811	6.96785	6.27633	5.91845	0.186175	0.215174	0.282203
A_44_P203821	3.8734	3.5947	3.60068	4.05388	3.89309	4.25643	3.23446	3.32546	3.49591	0.00450467	0.0317573	3.68959	3.35195	4.0678	0.159211	0.13272	0.182069
A_44_P204257	3.36571	3.38772	2.95723	3.7648	3.71565	4.59359	2.86483	2.787	2.61389	0.008675	0.0408878	3.23689	2.75524	4.02468	0.242436	0.128446	0.493302
A_44_P204569	11.1179	11.1241	11.101	10.9943	10.977	11.0751	11.1948	11.2027	11.1493	0.00335751	0.0291347	11.1143	11.1823	11.0155	0.0119715	0.028852	0.0523606
A_44_P205192	1.79675	1.69264	1.68787	1.6414	1.55386	1.57322	1.50893	1.5008	1.52685	0.00322101	0.0286823	1.72575	1.51219	1.5895	0.0615274	0.0133274	0.045982
A_44_P205401	6.75283	6.87228	6.71601	6.89043	6.95956	7.05591	7.25086	7.21132	7.02891	0.00803209	0.0397881	6.78037	7.16369	6.96864	0.0816991	0.118393	0.0831127
A_44_P205456	4.79653	4.42396	4.15956	3.17663	3.81195	3.70003	3.35774	3.28752	2.96793	0.00508359	0.0333674	4.46001	3.2044	3.56287	0.32001	0.207775	0.339142
A_44_P205523	1.67533	1.59779	1.60729	2.25438	2.30104	2.73949	1.46954	1.46775	1.51042	0.000639963	0.014605	1.6268	1.48257	2.43164	0.0422942	0.0241346	0.267625
A_44_P205637	1.72401	1.63267	1.63511	1.62087	1.53739	1.55925	1.48569	1.48407	1.51607	0.00650328	0.0367962	1.66393	1.49528	1.5725	0.0520445	0.0180282	0.0432879
A_44_P205902	14.9925	14.9725	14.9362	15.1725	15.1244	15.1725	15.1725	15.2154	15.0567	0.00739623	0.0386607	14.9671	15.1482	15.1565	0.0285363	0.0820626	0.0277792
A_44_P205941	5.91107	5.82223	5.98582	6.42933	6.22271	6.32863	6.33766	6.12522	6.13377	0.00643214	0.0366571	5.90637	6.19888	6.32689	0.081898	0.12026	0.103322
A_44_P206270	12.3284	12.1478	12.3064	12.7285	12.5395	12.8598	12.4811	12.4365	12.5541	0.0087525	0.0410874	12.2609	12.4906	12.7093	0.0985247	0.0593923	0.160976
A_44_P206292	7.32459	8.10783	8.30257	3.31411	3.20005	3.61919	3.53961	2.99996	3.78536	1.21035e-05	0.00369528	7.91166	3.44164	3.37778	0.517662	0.401765	0.216701
A_44_P206552	7.30832	7.51073	7.14811	6.07865	6.04061	6.64151	6.20329	6.60816	5.79228	0.00881291	0.0412648	7.32239	6.20125	6.25359	0.181715	0.407944	0.336483
A_44_P206611	6.97927	7.16439	7.32032	7.4192	7.24447	6.71449	5.13765	6.07367	5.6151	0.00276135	0.0273299	7.15466	5.60881	7.12605	0.17073	0.468042	0.366974
A_44_P207225	2.03475	1.81399	1.93872	1.76125	1.702	1.81254	1.57646	1.67916	1.49646	0.00921712	0.0419751	1.92915	1.58403	1.7586	0.110692	0.0915849	0.055314
A_44_P207549	5.34469	5.76147	5.86084	3.61226	3.79264	3.64236	3.14567	3.73178	4.36255	0.00124583	0.0195773	5.65567	3.74667	3.68242	0.273854	0.608575	0.0966332
A_44_P207773	3.76546	3.80892	3.91797	3.41287	4.0836	3.7275	2.96403	2.98931	2.8242	0.00306044	0.028054	3.83078	2.92585	3.74132	0.0785705	0.0889355	0.335582
A_44_P208127	1.16113	1.16461	1.16087	1.16405	1.46767	1.17548	1.69925	1.69206	1.56853	0.00330417	0.0289209	1.1622	1.65328	1.26906	0.0020854	0.0734855	0.172091
A_44_P208457	2.10826	1.8726	2.00696	1.78231	1.72952	1.77639	1.57375	1.70226	1.49868	0.00495825	0.0330067	1.99594	1.59156	1.76274	0.118214	0.10295	0.0289186
A_44_P208477	4.52002	4.745	4.7977	4.81886	4.58176	5.08251	6.25408	6.33173	6.08964	8.51327e-05	0.0076722	4.68757	6.22515	4.82771	0.147475	0.123612	0.250492
A_44_P208532	3.56477	4.09366	3.90809	4.81567	5.06835	5.47446	4.76788	5.28863	4.80481	0.00399161	0.0305811	3.8555	4.95377	5.11949	0.268334	0.290582	0.332361
A_44_P208552	2.16313	1.91386	1.94353	1.825	1.69467	1.84582	1.63376	1.57441	1.54481	0.00485511	0.0328482	2.00684	1.58432	1.7885	0.136161	0.0452964	0.0819218
A_44_P208617	1.75504	1.64404	1.65554	1.63865	1.54611	1.57179	1.49759	1.49671	1.51354	0.00755275	0.0388813	1.68487	1.50261	1.58552	0.0610399	0.00946948	0.0477732
A_44_P209613	4.60167	4.49833	4.41387	3.70932	3.29232	3.94292	4.69453	4.77826	4.36758	0.00441556	0.031597	4.50462	4.61346	3.64819	0.0940565	0.217012	0.329582
A_44_P209650	2.0222	1.87731	2.01935	1.66205	1.69031	1.49304	1.47289	1.38755	1.44434	0.000553911	0.013883	1.97295	1.43493	1.61513	0.0828445	0.0434427	0.106679
A_44_P209788	10.8838	10.9995	10.6663	10.2116	10.1517	10.4438	10.1873	10.1097	10.3541	0.00373784	0.0303243	10.8499	10.217	10.269	0.169191	0.124884	0.154286
A_44_P209926	7.9916	7.93184	7.73132	8.61637	8.42542	8.40585	8.00495	8.31208	8.0537	0.00577531	0.0350808	7.88492	8.12358	8.48254	0.136336	0.165058	0.116306
A_44_P210057	2.15503	1.91175	1.94021	1.88589	1.62753	1.79639	1.53938	1.53056	1.46997	0.00476907	0.0325778	2.00233	1.5133	1.76994	0.133006	0.0377818	0.131198
A_44_P210173	5.86869	5.81537	6.20831	7.38486	6.61149	6.55669	7.29687	7.70884	7.73604	0.00275406	0.0273107	5.96412	7.58058	6.85101	0.213146	0.24608	0.463138
A_44_P210410	8.1611	8.09128	8.72816	8.94918	8.7917	8.84357	9.37641	9.35624	9.06378	0.00719021	0.0381844	8.32685	9.26548	8.86148	0.349294	0.174961	0.0802562
A_44_P210692	5.8169	6.0209	5.80428	6.27722	6.134	6.36516	6.42963	6.62098	6.45091	0.00166813	0.021833	5.88069	6.5005	6.25879	0.121587	0.104872	0.116677
A_44_P210898	4.99361	4.81216	5.07393	5.38176	5.22583	5.48139	5.58115	5.6571	6.15165	0.00788562	0.0394941	4.9599	5.79663	5.36299	0.134099	0.309794	0.128806
A_44_P210971	1.75512	1.63664	1.65706	1.63383	1.54711	1.57591	1.4985	1.49875	1.507	0.0073833	0.0386607	1.68294	1.50142	1.58562	0.0633389	0.00483864	0.0441676
A_44_P211120	3.78068	3.38236	2.74456	3.14349	3.65835	3.29771	1.88772	2.28779	2.2133	0.00934681	0.0422641	3.30253	2.1296	3.36652	0.522653	0.21276	0.264238
A_44_P212322	2.09043	1.84063	1.94328	1.80246	1.70805	1.92118	1.61433	1.56198	1.51756	0.00792336	0.0395771	1.95811	1.56462	1.81057	0.125562	0.0484403	0.106797
A_44_P212551	8.07364	9.18414	8.56982	6.69039	6.63923	6.43821	7.30412	8.50042	7.93466	0.00566811	0.0348339	8.6092	7.91307	6.58928	0.556295	0.598438	0.133306
A_44_P212552	9.22593	9.26441	9.03284	9.83039	10.137	9.78637	9.74799	9.72074	9.79096	0.00112685	0.0190044	9.1744	9.75323	9.91793	0.12409	0.0354051	0.191015
A_44_P212575	3.94758	3.36669	2.71379	3.6289	2.96595	3.68001	5.03148	5.18821	4.73314	0.00661415	0.037059	3.34269	4.98428	3.42495	0.617249	0.231177	0.398327
A_44_P212582	2.06655	1.83225	1.95628	1.78271	1.71021	1.85705	1.62821	1.58832	1.5046	0.0055303	0.0345586	1.95169	1.57371	1.78333	0.117219	0.0630917	0.0734197
A_44_P212800	1.20643	1.19426	1.20316	2.14202	2.50885	2.51731	1.30314	1.23107	1.47462	9.91419e-05	0.00814925	1.20128	1.33628	2.38939	0.00629748	0.125109	0.214273
A_44_P212887	4.55175	5.08086	4.71197	4.00822	3.90331	3.59616	3.78347	4.04691	4.1117	0.00419816	0.031215	4.78153	3.98069	3.8359	0.271327	0.173846	0.214141
A_44_P212964	12.7938	13.8473	13.4734	11.359	11.4041	11.6261	12.1258	13.2401	12.8836	0.00596362	0.0355441	13.3715	12.7498	11.4631	0.534117	0.569084	0.142974
A_44_P213001	6.77775	6.9245	6.92858	6.39334	6.27903	6.35906	5.93969	5.7694	5.80482	1.18625e-05	0.00369528	6.87694	5.83797	6.34381	0.0859279	0.0898592	0.0586615
A_44_P213088	4.02149	4.26645	3.89097	4.31293	4.61809	4.38919	3.81501	3.74503	3.41862	0.00672318	0.0373315	4.05964	3.65955	4.44007	0.190624	0.211565	0.158815
A_44_P213149	2.59428	3.3172	2.98825	1.57634	1.58576	1.73023	1.81053	1.50307	1.97654	0.00124999	0.0195942	2.96657	1.76338	1.63078	0.361947	0.240231	0.0862581
A_44_P213363	4.69235	5.35013	5.24841	4.01423	3.6289	3.63396	4.10887	4.93125	4.62631	0.00842175	0.040498	5.09696	4.55548	3.75903	0.354078	0.415743	0.221026
A_44_P213380	1.97824	1.77243	1.84841	1.75325	1.65089	1.82838	1.5834	1.55361	1.51546	0.00898351	0.0416336	1.86636	1.55083	1.74417	0.104073	0.0340545	0.0890961
A_44_P213560	4.13578	5.41832	5.27679	4.60359	2.99875	3.88631	1.33158	2.0773	1.74109	0.00257557	0.0264717	4.94363	1.71666	3.82955	0.703188	0.373455	0.803921
A_44_P213726	1.60104	1.59433	1.54971	1.45516	1.44836	1.42828	1.42019	1.41945	1.43615	9.9127e-05	0.00814925	1.58169	1.42527	1.44393	0.0278978	0.00943491	0.0139749
A_44_P214017	2.884	3.17332	2.56537	2.78602	3.25463	2.7109	4.81059	4.22187	3.88732	0.00461162	0.0322095	2.87423	4.30659	2.91718	0.304091	0.46743	0.294642
A_44_P214304	2.14321	1.89072	1.94249	1.8293	1.70035	1.89654	1.63932	1.58219	1.54079	0.00761532	0.0391084	1.99214	1.58744	1.80873	0.133367	0.0494753	0.0997006
A_44_P214340	5.16812	4.9046	5.16812	4.90309	4.9329	4.93098	4.67459	4.22545	4.18624	0.00634075	0.0365118	5.08028	4.36209	4.92232	0.152143	0.271341	0.0166827
A_44_P214479	4.36375	5.00447	4.61999	3.31959	3.36956	2.87207	3.9288	4.52608	4.8168	0.00486575	0.0328482	4.66273	4.42389	3.18707	0.32249	0.452734	0.27394
A_44_P214599	1.59045	1.52371	1.56298	1.5347	1.49999	1.51546	1.45146	1.4508	1.45666	0.00298083	0.0278702	1.55904	1.45297	1.51672	0.0335437	0.00320925	0.0173875
A_44_P214811	9.8195	9.89781	10.0336	11.3582	11.4963	11.3729	11.0262	11.1948	11.1935	2.73518e-06	0.00194862	9.91696	11.1382	11.4091	0.108318	0.0969574	0.0758534
A_44_P214846	9.54124	10.7851	10.5989	6.10438	6.96953	7.15665	7.07233	6.80511	6.46947	0.00025946	0.0109958	10.3084	6.7823	6.74352	0.670883	0.302074	0.561363
A_44_P214873	4.80874	5.12126	5.43819	6.62728	6.46807	6.82387	8.30713	7.45559	8.55645	0.000274322	0.0114387	5.12273	8.10639	6.63974	0.31473	0.577231	0.178225
A_44_P215087	5.8991	5.70669	5.71228	6.4593	6.14871	6.27178	6.09076	6.37635	6.2014	0.00717735	0.0381718	5.77269	6.22283	6.29326	0.10951	0.143996	0.156405
A_44_P215148	4.59576	3.66795	3.50501	3.81327	3.1828	3.73896	5.77237	5.35971	5.23074	0.00365921	0.0300571	3.92291	5.45428	3.57834	0.588376	0.282928	0.34456
A_44_P215414	1.48148	1.43794	1.49861	1.44175	1.46541	1.47526	1.40321	1.37321	1.34878	0.00704383	0.0379322	1.47268	1.37507	1.46081	0.0312777	0.0272632	0.0172212
A_44_P215880	9.13778	9.21291	9.44179	9.15525	9.26522	9.27135	9.68273	9.60568	9.85574	0.00514432	0.0336066	9.26416	9.71472	9.23061	0.158354	0.128062	0.0653329
A_44_P215974	4.38278	4.38919	4.15276	4.983	4.97784	5.0687	4.97555	4.64098	5.09833	0.00348433	0.0295407	4.30824	4.90495	5.00985	0.134692	0.236706	0.0510342
A_44_P216858	2.22675	1.94571	2.01775	1.85904	1.74057	1.97333	1.66243	1.58348	1.53997	0.00684604	0.0376117	2.0634	1.59529	1.85765	0.145977	0.0620764	0.116387
A_44_P216903	6.86497	6.8152	6.67437	6.90174	6.85566	6.77581	6.56471	6.39832	6.41964	0.00317931	0.0285832	6.78485	6.46089	6.8444	0.0988558	0.0905396	0.0637174
A_44_P216969	1.45367	1.42697	1.44909	1.41884	1.40431	1.39078	1.36843	1.35836	1.39339	0.00449521	0.0317573	1.44324	1.37339	1.40464	0.0142759	0.0180354	0.0140316
A_44_P217250	9.1177	9.49124	9.5034	8.96816	8.89107	8.90954	8.84314	8.8299	8.56636	0.00713071	0.0380838	9.37078	8.74647	8.92292	0.219257	0.156117	0.0402506
A_44_P217286	1.27487	1.27961	1.26657	2.32735	2.28183	2.28154	1.29589	1.69139	1.82433	0.000620623	0.0145937	1.27368	1.60387	2.29691	0.00659881	0.274876	0.0263661
A_44_P217654	2.19851	1.9331	1.97506	1.89072	1.65377	1.84428	1.55737	1.53793	1.47513	0.00422263	0.0312571	2.03556	1.52348	1.79625	0.142676	0.0429865	0.125564
A_44_P217774	10.0209	10.0779	9.9486	10.3517	10.3722	10.2532	10.4108	10.457	10.6831	0.00236414	0.0254504	10.0158	10.517	10.3257	0.0648206	0.145745	0.0636176
A_44_P217821	6.55743	6.66551	6.86925	7.02483	6.87477	7.07263	6.51958	6.39061	6.56303	0.00663649	0.0370854	6.6974	6.49107	6.99074	0.158333	0.0896761	0.103243
A_44_P217919	1.48153	1.45035	1.47265	1.44617	1.42571	1.41945	1.38682	1.37566	1.41665	0.0054235	0.0344671	1.46818	1.39304	1.43044	0.0160662	0.0211906	0.013973
A_44_P217942	2.76536	2.4425	2.39592	2.78778	2.75988	2.99357	1.95932	2.04257	1.9538	0.000830268	0.0167849	2.5346	1.98523	2.84708	0.201205	0.0497341	0.127632
A_44_P217946	3.14651	2.33707	3.19678	1.29964	1.30314	1.41407	2.95804	3.85319	3.33385	0.00148002	0.0207898	2.89346	3.38169	1.33895	0.4825	0.449488	0.06508
A_44_P218079	2.29709	1.9975	2.07302	1.90896	1.72454	1.96664	1.60435	1.54893	1.48593	0.00330996	0.0289235	2.12254	1.5464	1.86671	0.155809	0.0592535	0.126463
A_44_P218097	6.301	6.35185	6.65315	6.23696	6.20661	6.27591	5.96227	5.8991	5.84905	0.0039233	0.0305339	6.43533	5.90347	6.23982	0.190342	0.0567334	0.0347398
A_44_P218317	1.66271	1.62111	1.61034	1.52428	1.50906	1.50965	1.46686	1.4577	1.50446	0.000329171	0.0120401	1.63139	1.47634	1.51433	0.0276547	0.024778	0.00862265
A_44_P218695	6.55453	6.64809	6.6613	5.41492	5.57071	5.99071	5.97023	5.92621	6.04975	0.00163009	0.0215998	6.6213	5.98206	5.65878	0.0582036	0.0626184	0.297831
A_44_P219158	3.63254	3.58561	3.88653	3.78117	3.64208	3.63175	3.02942	3.06007	2.57204	0.00288485	0.0275709	3.70156	2.88718	3.685	0.161901	0.273344	0.0834432
A_44_P219179	1.51379	1.46292	1.5231	1.47069	1.48369	1.50893	1.42267	1.401	1.38018	0.00563552	0.0346801	1.49993	1.40129	1.48777	0.0323952	0.0212466	0.0194443
A_44_P219680	2.23366	1.94926	2.03364	1.85957	1.74801	1.97969	1.65688	1.57617	1.53648	0.00583463	0.0351999	2.07218	1.58984	1.86242	0.14607	0.0613568	0.115867
A_44_P219788	8.51772	8.47571	8.52767	8.87258	8.71568	8.78673	8.6686	8.78007	8.71936	0.00229429	0.0251255	8.50703	8.72268	8.79166	0.0275817	0.0558125	0.0785643
A_44_P220112	12.4758	12.279	12.2222	12.8934	12.712	12.8456	12.6312	12.6884	12.6241	0.00216865	0.0245595	12.3256	12.6479	12.817	0.133085	0.0352911	0.0940187
A_44_P220190	1.64777	1.61629	1.60252	1.50437	1.49987	1.49602	1.46145	1.45195	1.49799	0.00017351	0.00974123	1.62219	1.47046	1.50009	0.0231959	0.0243053	0.00418081
A_44_P220394	13.6986	13.6017	13.7392	14.1081	14.148	14.2977	14.294	14.3745	14.2701	0.000130933	0.00898541	13.6798	14.3129	14.1846	0.0706672	0.0546739	0.0999602
A_44_P220533	4.15348	4.17384	4.70142	4.70015	4.97627	5.03909	5.67802	5.67611	5.05722	0.00957707	0.0427259	4.34291	5.47045	4.90517	0.310646	0.35787	0.18031
A_44_P220861	8.02762	7.9158	7.97179	7.58543	7.34867	7.19965	7.62926	7.40496	7.59986	0.00453823	0.0318592	7.97174	7.54469	7.37792	0.0559087	0.121903	0.194543
A_44_P221622	2.1165	1.88561	1.9113	1.8094	1.67701	1.81208	1.62043	1.56886	1.54381	0.00476523	0.0325778	1.97114	1.5777	1.76616	0.126542	0.0390699	0.0772228
A_44_P221796	7.54013	7.49324	7.52896	7.90644	7.8902	7.72411	8.02927	7.80548	7.99139	0.00322539	0.028704	7.52077	7.94204	7.84025	0.0244929	0.119776	0.100908
A_44_P222021	14.0019	13.5563	14.2701	14.7475	14.9255	14.5381	15.0743	15.3467	14.8951	0.00504978	0.0332796	13.9428	15.1054	14.737	0.360573	0.227401	0.193909
A_44_P222177	3.03936	3.13944	3.21043	3.00069	2.76094	2.72114	2.16234	1.82902	2.30998	0.000933482	0.0176293	3.12974	2.10044	2.82759	0.0859492	0.246382	0.151224
A_44_P222233	1.88326	1.72738	1.75782	1.70935	1.59534	1.6642	1.54217	1.53261	1.52028	0.00494916	0.0330067	1.78949	1.53169	1.6563	0.0826211	0.0109735	0.0574129
A_44_P222256	13.1278	13.1149	12.9192	13.5563	13.4168	13.3918	13.5618	13.5115	13.824	0.00399231	0.0305811	13.0539	13.6324	13.455	0.116897	0.167802	0.0886306
A_44_P222341	1.67338	1.61557	1.61207	1.55881	1.52025	1.53436	1.46898	1.46365	1.50899	0.00126809	0.0196215	1.63367	1.48054	1.53781	0.0344288	0.0247782	0.0195088
A_44_P222458	4.7593	4.72691	4.74887	5.26667	5.29243	5.16409	4.66988	4.85922	4.85898	0.000343399	0.012226	4.74503	4.79603	5.24106	0.0165301	0.10925	0.067895
A_44_P222533	1.79369	1.62207	1.69139	4.59523	4.64572	4.2823	4.17974	4.65918	4.54581	2.6754e-06	0.00194862	1.70238	4.46158	4.50775	0.0863374	0.250573	0.196872
A_44_P222632	1.97993	1.81044	1.82271	1.75289	1.62233	1.6978	1.57537	1.54477	1.53845	0.00346705	0.02947	1.87103	1.55286	1.69101	0.0945101	0.0197488	0.0655451
A_44_P222640	13.5503	13.4154	13.421	13.6684	13.6883	13.7811	13.665	13.7234	13.6357	0.00518033	0.0337387	13.4622	13.6747	13.7126	0.0762813	0.0446488	0.0601507
A_44_P222702	8.94154	8.89561	8.91196	9.16156	9.16769	9.25596	9.25338	9.23687	9.17541	0.000168544	0.00962375	8.91637	9.22189	9.19507	0.0232785	0.0410906	0.052821
A_44_P222765	11.2818	11.3205	11.4548	11.7037	11.6874	11.7732	11.5017	11.4326	11.5556	0.00171717	0.0219617	11.3523	11.4966	11.7214	0.0907953	0.0616276	0.0455767
A_44_P222865	13.7422	13.5319	13.4932	13.9685	13.9685	13.918	13.7234	13.8258	13.8899	0.00859118	0.0407754	13.5891	13.813	13.9516	0.134012	0.0839842	0.0291262
A_44_P222924	5.68675	5.45562	5.27122	5.0933	4.74818	4.92111	3.86501	4.12324	4.47631	0.00144885	0.0206587	5.4712	4.15485	4.92086	0.208204	0.306875	0.172564
A_44_P223003	1.65094	1.56784	2.18545	1.53914	1.57695	1.4618	4.08333	6.52618	3.66795	0.00874149	0.0410718	1.80141	4.75915	1.52596	0.335174	1.54432	0.0586954
A_44_P223279	4.08426	3.88457	3.90625	4.14519	4.2335	3.85531	4.7165	4.85539	4.56931	0.00202406	0.0237676	3.95836	4.71373	4.078	0.109569	0.14306	0.197843
A_44_P223320	4.39196	4.4085	4.46524	4.60866	4.35811	4.70755	3.98323	3.82706	3.91119	0.00105155	0.0185711	4.4219	3.90716	4.5581	0.0384343	0.0781605	0.180122
A_44_P224123	1.56938	1.5317	1.52428	1.50696	1.46255	1.48701	1.401	1.39893	1.45753	0.00425187	0.0313241	1.54179	1.41915	1.48551	0.0241823	0.0332525	0.0222476
A_44_P224282	4.31545	4.41166	4.25285	3.67689	3.93159	3.25627	3.18777	3.36376	3.59065	0.00623225	0.0362028	4.32665	3.38073	3.62159	0.0799941	0.201971	0.341039
A_44_P224321	2.38051	2.97137	2.35663	1.30413	1.28929	1.77367	1.33285	1.334	1.71254	0.00452987	0.0318381	2.5695	1.4598	1.4557	0.348232	0.218884	0.275472
A_44_P225097	12.3575	12.3865	12.5202	12.1196	12.1532	12.1238	12.2564	12.2515	12.2587	0.00136206	0.0200773	12.4214	12.2555	12.1322	0.086764	0.00364845	0.0183068
A_44_P225105	1.50068	1.4589	1.49224	1.45775	1.44791	1.46426	1.40431	1.39453	1.40808	0.00114339	0.0190044	1.48394	1.40231	1.45664	0.0220954	0.00699514	0.00823457
A_44_P225109	1.35268	1.39497	1.61503	2.27203	2.81963	2.83551	1.80421	1.33844	1.25045	0.00225693	0.025036	1.45423	1.46437	2.64239	0.140854	0.297584	0.320838
A_44_P225691	5.46875	5.71753	5.61405	5.62979	5.4463	5.70791	5.18904	4.98921	4.95185	0.00273681	0.0273107	5.60011	5.04337	5.59466	0.124977	0.12753	0.134297
A_44_P225834	2.8888	2.73606	2.91855	3.60299	3.01214	3.88091	4.07539	5.13269	5.32901	0.00536707	0.0344008	2.8478	4.8457	3.49868	0.0979114	0.674292	0.443678
A_44_P226109	4.10238	4.45865	4.42139	4.45025	4.60579	4.64572	5.62846	5.43092	5.49285	0.000107024	0.00825445	4.32747	5.51741	4.56725	0.195827	0.101031	0.103278
A_44_P226726	5.98562	5.74256	5.75086	5.92295	5.77416	5.99141	7.12619	6.96663	6.98871	2.12924e-05	0.0045505	5.82635	7.02717	5.89617	0.137998	0.0864533	0.111074
A_44_P226999	10.2376	11.4483	11.4137	7.95153	8.37829	8.7808	8.60424	8.7482	7.86272	0.00136261	0.0200773	11.0332	8.40505	8.3702	0.689239	0.475162	0.414694
A_44_P227065	5.53793	6.88037	6.79426	1.45618	2.23125	3.05147	2.64127	2.70127	3.27023	0.000523007	0.0137026	6.40419	2.87092	2.2463	0.751432	0.347108	0.797753
A_44_P227146	2.10729	1.90563	2.04418	1.73338	1.72424	1.6068	1.52109	1.45895	1.47748	0.00035973	0.0124518	2.01903	1.48584	1.68814	0.103157	0.0318989	0.0705887
A_44_P227174	5.83302	6.00946	5.73706	5.64522	5.6225	5.75143	5.08086	4.82561	4.9631	0.000171741	0.00973187	5.85984	4.95652	5.67305	0.138167	0.127756	0.0688263
A_44_P227206	2.58238	2.65374	2.94637	3.61719	3.8411	3.76006	3.20788	2.61468	3.25312	0.00574098	0.034941	2.7275	3.02523	3.73945	0.192879	0.356263	0.113369
A_44_P227221	6.73054	6.40394	6.80725	6.30151	5.77349	6.16574	4.94451	4.91056	4.25935	0.000567406	0.0141112	6.64724	4.7048	6.08025	0.214169	0.386151	0.274197
A_44_P227286	11.7037	11.8652	11.6328	12.1586	12.0749	12.1408	12.0436	12.1175	12.0088	0.00209883	0.0241713	11.7339	12.0566	12.1248	0.11908	0.0555046	0.0441027
A_44_P227457	3.69296	4.42481	3.95776	5.17751	5.00422	4.93414	4.56561	4.86025	4.38636	0.00970312	0.0429336	4.02518	4.60407	5.03863	0.370554	0.239271	0.125278
A_44_P227676	2.00776	1.80972	1.94837	1.73109	1.69743	1.69615	1.54682	1.50489	1.47999	0.000623358	0.0145937	1.92195	1.51056	1.70822	0.101629	0.0337743	0.0198133
A_44_P228016	2.20131	1.95727	2.08014	1.7859	1.74887	1.70069	1.55232	1.4942	1.50028	0.000320936	0.0119857	2.07957	1.5156	1.74515	0.12202	0.0319431	0.0427252
A_44_P228145	4.98	4.96431	5.15048	4.79361	4.73249	4.85898	4.21992	3.65244	3.90086	0.000629208	0.0145937	5.0316	3.9244	4.79503	0.103257	0.284472	0.0632565
A_44_P228599	9.26942	9.19722	9.03622	9.40292	9.71908	9.60066	9.73608	9.6308	9.52533	0.00924599	0.0420333	9.16762	9.63074	9.57422	0.119384	0.105374	0.15973
A_44_P228839	7.86072	7.80161	7.87814	8.0987	8.07364	8.01509	8.26987	8.38396	8.34728	5.02733e-05	0.00621561	7.84682	8.3337	8.06248	0.0401142	0.0582449	0.0429084
A_44_P229122	5.37826	6.30539	6.21278	3.65131	2.9098	3.18308	3.27193	2.82665	3.61802	0.000344844	0.012226	5.96548	3.23887	3.24806	0.510645	0.396718	0.375002
A_44_P229289	5.87213	5.76568	5.51251	5.95457	5.62138	5.90635	4.94507	5.05118	5.0677	0.00133978	0.0199867	5.71677	5.02132	5.82743	0.18473	0.0665439	0.180069
A_44_P229816	3.56851	3.47635	3.2118	3.04045	3.64524	3.17709	1.88829	2.15201	2.57772	0.00420875	0.0312284	3.41889	2.20601	3.28759	0.185169	0.347872	0.317173
A_44_P230780	4.11791	4.04714	4.29137	4.66036	4.71526	4.75251	4.08765	4.26436	4.02034	0.000824331	0.0166874	4.15214	4.12412	4.70938	0.125663	0.126031	0.0463572
A_44_P230851	2.09147	1.88968	1.90026	1.87971	1.59136	1.69501	1.51246	1.51113	1.461	0.00559158	0.0346536	1.96047	1.49486	1.72202	0.113572	0.0293346	0.146062
A_44_P231303	1.61741	1.6068	1.57961	1.46185	1.4737	1.46092	1.4411	1.43785	1.46626	2.97095e-05	0.00517045	1.60128	1.4484	1.46549	0.0194977	0.0155524	0.00712367
A_44_P231327	1.26527	1.24978	1.2463	3.15687	2.81085	3.21722	3.77894	3.69977	2.47128	0.00239149	0.025628	1.25378	3.31666	3.06165	0.0100992	0.73319	0.219283
A_44_P231351	1.64232	1.6024	1.59262	1.51141	1.49837	1.50567	1.45383	1.45051	1.49304	0.000338853	0.0122151	1.61244	1.46579	1.50515	0.0263292	0.0236501	0.00653534
A_44_P232060	1.40077	2.29519	1.37561	1.52351	1.81007	2.0101	3.52588	3.14763	3.11805	0.00283448	0.0275429	1.69052	3.26385	1.78122	0.523809	0.227399	0.244573
A_44_P232158	1.42879	1.39771	2.13995	2.47762	2.76372	2.26509	1.37383	1.344	1.30472	0.00598525	0.0356215	1.65549	1.34085	2.50215	0.419847	0.034663	0.250214
A_44_P233206	4.39093	4.34067	4.37559	4.00647	3.87316	3.99433	3.5522	3.73044	3.62204	3.82444e-05	0.00576278	4.36907	3.63489	3.95799	0.0257582	0.0898099	0.0737098
A_44_P233612	9.44609	9.80673	10.0633	8.87592	8.8352	8.78438	8.8005	8.77467	8.55856	0.00108495	0.0188401	9.77202	8.71124	8.83183	0.310046	0.132857	0.0458628
A_44_P233817	3.93956	4.38723	4.05543	4.63881	4.78557	4.84808	4.11283	3.78091	4.25183	0.00994185	0.0433607	4.12741	4.04852	4.75748	0.232351	0.241953	0.107422
A_44_P234023	13.4427	13.2977	13.2608	13.8351	13.7739	13.8351	13.6986	13.7106	13.8095	0.000287329	0.011555	13.3337	13.7396	13.8147	0.096123	0.0608383	0.0353413
A_44_P234129	6.48301	7.18276	7.14914	5.11126	5.01978	5.51666	5.49779	5.39278	5.63522	0.000641158	0.014605	6.9383	5.5086	5.2159	0.394651	0.121582	0.264448
A_44_P234550	1.63964	1.5327	1.66016	1.5436	1.55792	1.55708	1.47138	1.43692	1.41078	0.00796463	0.0396509	1.61083	1.43969	1.55287	0.0684353	0.0303936	0.00803804
A_44_P234602	5.88515	5.86661	6.02288	5.84499	5.99125	5.90332	5.50392	5.45935	5.36585	0.000378528	0.0124518	5.92488	5.44304	5.91319	0.0853742	0.0704627	0.0736321
A_44_P235241	8.03433	8.11961	7.69024	9.01775	8.76497	8.48537	8.65765	8.76305	8.59456	0.00582321	0.0351739	7.94806	8.67176	8.75603	0.227312	0.0851249	0.266304
A_44_P235919	8.56292	8.4306	8.39359	11.245	11.131	10.9121	10.7582	10.8917	11.3878	9.71534e-06	0.00338003	8.46237	11.0126	11.0961	0.0890256	0.33172	0.169196
A_44_P236013	1.70561	1.6236	1.62533	1.60812	1.53303	1.55316	1.47969	1.47718	1.51527	0.00548345	0.0345209	1.65151	1.49071	1.56477	0.0468572	0.0213024	0.0388704
A_44_P236036	2.69169	2.16976	1.69538	1.53633	1.5666	1.49837	3.82187	3.54083	3.54366	0.000397645	0.012549	2.18561	3.63545	1.53377	0.498345	0.161449	0.0341872
A_44_P236071	9.95701	9.8853	9.86238	10.2786	10.1029	10.1525	10.0325	10.0258	10.1478	0.00909307	0.041779	9.90156	10.0687	10.178	0.0493656	0.068593	0.0905383
A_44_P236144	5.29771	6.05058	5.39786	4.46125	4.40031	4.00067	6.15248	6.00527	6.01915	0.000629779	0.0145937	5.58205	6.05897	4.28741	0.408839	0.0812815	0.250186
A_44_P236393	6.26305	6.33739	6.41531	6.86387	6.87392	6.87338	6.72289	6.62079	6.76598	0.000116394	0.00853559	6.33858	6.70322	6.87039	0.0761365	0.074564	0.005653
A_44_P236577	1.33153	1.32342	1.32672	1.31636	1.33325	1.44152	1.48416	1.60019	1.60389	0.00418777	0.0311989	1.32722	1.56275	1.36371	0.00407996	0.068082	0.0679145
A_44_P236713	4.35602	3.96861	4.12093	4.19867	3.51215	3.91941	5.29189	4.67656	5.42287	0.00741428	0.0386607	4.14852	5.13044	3.87674	0.195174	0.398493	0.345242
A_44_P236803	1.71793	1.64725	1.6363	1.57804	1.53152	1.53723	1.48422	1.47543	1.51785	0.00153471	0.0210635	1.66716	1.4925	1.54893	0.0443053	0.0223852	0.0253708
A_44_P236815	7.53416	7.47594	7.3505	7.84048	7.5323	7.68501	7.25581	6.91774	6.76396	0.00771588	0.0393081	7.45353	6.97917	7.68593	0.0938589	0.251614	0.154096
A_44_P236955	9.56277	9.35107	10.2911	8.05252	7.86042	8.19565	8.28169	7.86597	7.73182	0.00115036	0.0190044	9.73497	7.95983	8.03619	0.493099	0.286701	0.168208
A_44_P237153	7.54592	8.4777	8.12582	6.26615	7.03488	7.03721	6.28829	6.24596	6.11351	0.00268409	0.0270521	8.04981	6.21592	6.77941	0.470517	0.0911836	0.444505
A_44_P237318	1.79228	1.64621	1.69182	1.64315	1.56495	1.6139	1.51168	1.51168	1.49983	0.00683014	0.0376117	1.7101	1.50773	1.60733	0.0747328	0.00684374	0.0395153
A_44_P237621	9.14526	9.25083	9.26559	8.47425	8.6537	8.80397	8.95744	9.03258	9.16993	0.00277556	0.0273714	9.22056	9.05332	8.64397	0.0656252	0.107749	0.165075
A_44_P238204	11.8558	11.7732	12.3587	12.4945	12.4175	12.2665	12.9389	12.9611	12.7977	0.00451296	0.0317573	11.9959	12.8992	12.3928	0.316932	0.0886119	0.11597
A_44_P238210	10.5013	10.4257	11.0216	11.1222	10.9406	11.0324	11.6215	11.6742	11.6442	0.00223579	0.0249286	10.6495	11.6466	11.0317	0.324447	0.0264209	0.0907844
A_44_P238270	5.71166	6.94646	6.60322	3.8829	4.09176	4.61753	4.5568	5.51251	5.81457	0.00915693	0.0418505	6.42045	5.29463	4.19739	0.63737	0.656585	0.378537
A_44_P238424	10.2043	10.3718	9.77614	9.8076	9.84549	10.0542	9.33572	8.95614	8.98715	0.00348442	0.0295407	10.1174	9.09301	9.90244	0.307198	0.21077	0.132807
A_44_P238556	6.40558	6.8624	6.54613	2.38926	2.20296	1.90639	1.69974	2.04725	2.74377	7.67778e-06	0.00294512	6.6047	2.16358	2.1662	0.233973	0.53165	0.243523
A_44_P238789	13.8392	13.7352	13.7485	14.025	14.0426	14.1329	13.9844	13.9203	13.8717	0.00229589	0.0251255	13.7743	13.9255	14.0668	0.056623	0.056536	0.0579153
A_44_P238843	8.76978	8.82071	8.66005	9.06378	9.09184	8.88654	9.1089	9.07775	9.11966	0.00433735	0.0314203	8.75018	9.1021	9.01405	0.0821027	0.0217626	0.111317
A_44_P239162	5.25953	5.40516	5.26161	6.05766	5.87107	5.71958	5.98691	5.8884	6.24286	0.00244574	0.0259781	5.30877	6.03939	5.88277	0.0834859	0.182963	0.169342
A_44_P239306	5.59329	5.59567	5.68263	4.22895	4.55871	4.76996	4.4937	4.45685	4.21795	0.000302642	0.01177	5.62386	4.3895	4.5192	0.0509077	0.149708	0.272659
A_44_P240088	4.45711	4.21552	4.40551	4.28623	4.42169	4.32632	3.94702	4.0901	3.8058	0.00814422	0.0400692	4.35938	3.94764	4.34475	0.127231	0.142152	0.0695808
A_44_P240248	8.2	8.26712	8.19267	8.16023	7.85544	7.98368	7.54697	7.68007	7.52633	0.000806581	0.0165513	8.21993	7.58446	7.99978	0.0410288	0.0834456	0.153027
A_44_P240867	7.90252	7.68501	7.82146	7.49789	7.51216	7.44677	7.20975	7.07343	7.21617	0.000227754	0.0104448	7.803	7.16645	7.48561	0.109924	0.0806233	0.0343846
A_44_P240973	3.87651	3.25627	3.59446	3.95754	3.28952	3.45299	2.57204	2.79937	2.47497	0.00949564	0.0426079	3.57575	2.61546	3.56668	0.31054	0.166503	0.348222
A_44_P241196	1.51269	1.48907	1.46397	1.45205	1.39305	1.38441	1.3521	1.34371	1.39644	0.00662555	0.0370812	1.48858	1.36408	1.40984	0.0243593	0.0283343	0.0368077
A_44_P241398	4.29137	3.6813	4.13521	3.33753	3.08119	2.55988	4.01542	3.92468	4.06991	0.00793355	0.0395883	4.03596	4.00334	2.99287	0.316915	0.073368	0.396277
A_44_P241428	1.61715	1.56382	1.57284	1.56415	1.50515	1.53261	1.4431	1.4431	1.50062	0.00770059	0.0393081	1.5846	1.46227	1.53397	0.0285436	0.0332068	0.0295208
A_44_P241479	6.24582	6.11434	6.01649	6.36402	6.2397	6.53194	5.90046	5.97566	5.76487	0.00784321	0.03945	6.12555	5.88033	6.37855	0.115078	0.106827	0.14666
A_44_P241725	1.71028	1.62935	1.62903	1.60668	1.53376	1.55463	1.48144	1.47855	1.51662	0.00462884	0.0322231	1.65622	1.4922	1.56502	0.0468216	0.0211988	0.0375515
A_44_P241929	6.18316	6.05837	6.19618	5.14785	5.08791	4.92132	5.24914	5.39137	5.09498	5.9554e-05	0.00685411	6.1459	5.24516	5.05236	0.0760842	0.148238	0.117372
A_44_P242339	6.60008	6.30485	6.1822	6.21414	6.13141	6.29817	5.78561	5.82602	5.80304	0.00546506	0.0345209	6.36237	5.80489	6.21457	0.214797	0.0202668	0.0833837
A_44_P242493	1.90521	2.65043	2.23492	3.30572	3.25209	2.78166	3.29282	3.99677	4.3125	0.00849263	0.0405946	2.26352	3.86736	3.11316	0.373429	0.522013	0.288331
A_44_P242969	6.73412	6.50668	6.93624	8.05058	7.98726	8.06676	8.28986	8.3887	8.11961	3.01224e-05	0.00517045	6.72568	8.26606	8.03487	0.214907	0.136118	0.0420141
A_44_P243037	4.70112	5.13737	4.70516	4.69018	5.18975	5.1148	6.84003	6.47222	6.47842	0.000215573	0.0104448	4.84788	6.59689	4.99824	0.250712	0.210591	0.269411
A_44_P243111	6.51125	6.71657	6.90285	6.01035	6.28133	6.25907	6.00653	5.90046	6.27083	0.00976097	0.0430374	6.71022	6.05927	6.18358	0.195876	0.190733	0.150435
A_44_P243528	7.53112	7.3735	7.28927	7.28517	7.24179	7.24473	7.07374	6.97464	7.03123	0.00315499	0.0285047	7.39796	7.02654	7.25723	0.122765	0.0497185	0.0242425
A_44_P243760	4.35223	4.15426	4.15377	4.56093	4.77567	4.75063	4.39771	4.03926	4.26894	0.00986366	0.0431842	4.22009	4.2353	4.69575	0.114442	0.181578	0.117423
A_44_P243784	1.52154	1.46904	1.52297	1.47739	1.4804	1.51329	1.42654	1.40969	1.39457	0.00498515	0.0330417	1.50452	1.41027	1.49036	0.0307296	0.01599	0.019914
A_44_P243932	5.67847	5.26189	5.48988	5.94196	5.93752	6.1615	5.39372	5.49409	5.41191	0.00464194	0.0322243	5.47675	5.43324	6.01366	0.208601	0.0534739	0.128054
A_44_P244607	2.19369	1.94763	1.97389	1.89582	1.6383	1.79957	1.53636	1.52273	1.47114	0.00324306	0.0287248	2.0384	1.51008	1.7779	0.135121	0.0344026	0.130122
A_44_P244691	3.03077	2.0382	2.35254	1.53805	1.49069	1.53143	1.46391	1.49056	1.41128	0.00928264	0.0421449	2.47383	1.45525	1.52006	0.507282	0.0403449	0.0256455
A_44_P244783	2.11914	1.87492	1.92118	1.81885	1.68941	1.87653	1.62956	1.57838	1.53992	0.00770853	0.0393081	1.97175	1.58262	1.79493	0.129724	0.0449685	0.0958283
A_44_P245314	7.35234	7.13967	7.56996	6.78	6.6723	6.55146	6.72191	6.52398	6.8065	0.0032951	0.0288779	7.35399	6.68413	6.66792	0.215152	0.145004	0.114333
A_44_P245835	1.9709	1.71201	1.8365	1.69675	1.64503	1.7534	1.54823	1.5221	1.48165	0.00925239	0.0420333	1.8398	1.51733	1.69839	0.129477	0.0335468	0.0542074
A_44_P245936	3.94986	3.67125	4.18489	4.38699	4.24806	4.01672	5.60751	5.74526	4.95028	0.00213894	0.0244042	3.93533	5.43435	4.21726	0.25713	0.42484	0.187048
A_44_P246435	4.98626	4.87906	4.93849	5.34469	5.52005	5.28783	5.31447	5.64135	5.70512	0.00463939	0.0322243	4.9346	5.55365	5.38419	0.0537051	0.209575	0.121046
A_44_P247097	1.18027	1.17673	1.17917	1.17313	1.38154	1.18098	2.03685	2.00223	2.11619	1.37003e-05	0.00377598	1.17873	2.05176	1.24522	0.0018124	0.05842	0.118127
A_44_P247568	12.0155	12.1083	12.0361	11.987	12.1258	12.1071	12.83	12.4595	12.4161	0.00681516	0.0376117	12.0533	12.5685	12.0733	0.0487527	0.227472	0.0753358
A_44_P247631	4.38674	4.48955	4.37427	4.06798	4.22171	4.3718	3.96551	3.69076	3.4047	0.00777424	0.0393846	4.41685	3.68699	4.2205	0.0632671	0.280424	0.151914
A_44_P248411	2.74205	2.94811	3.36217	2.34633	2.73572	3.01214	1.68739	1.93014	1.75537	0.00391846	0.0305339	3.01744	1.79096	2.69806	0.31582	0.125227	0.3345
A_44_P248728	1.34056	1.33205	1.35584	1.32295	1.35566	1.39771	2.00523	1.76213	1.67533	0.00196731	0.0233974	1.34282	1.81423	1.35877	0.0120536	0.171009	0.0374791
A_44_P249105	1.32394	1.37003	1.31084	1.32053	1.30165	1.45951	1.68896	1.82231	1.66322	0.000972531	0.0179002	1.33493	1.72483	1.36057	0.0310909	0.085397	0.0862076
A_44_P249301	1.7634	1.65138	1.8162	1.58738	1.61108	1.49503	1.47337	1.40874	1.41343	0.00285308	0.0275429	1.74366	1.43185	1.5645	0.0841625	0.0360349	0.0613128
A_44_P249315	3.55392	3.45882	3.17902	4.34067	4.11984	4.43658	3.89518	3.60807	3.39346	0.00432043	0.0314203	3.39725	3.63224	4.29903	0.194888	0.251728	0.162428
A_44_P249343	2.21807	2.14321	2.01138	1.85606	1.73817	1.97409	1.81254	1.5842	1.53947	0.00944775	0.0424903	2.12422	1.6454	1.85611	0.104646	0.14646	0.11796
A_44_P249681	2.70629	2.27769	2.32333	3.05127	3.02784	3.17101	1.84117	1.89072	2.10905	0.000461109	0.0132783	2.43577	1.94698	3.08337	0.235387	0.142529	0.076795
A_44_P249717	2.01321	1.80797	1.85285	1.77574	1.64806	1.80345	1.59103	1.5612	1.53045	0.00699556	0.0378494	1.89134	1.56089	1.74241	0.107902	0.0302877	0.0828834
A_44_P249990	9.06326	8.82804	9.1353	9.63699	9.54989	9.71564	9.50382	9.21989	9.28549	0.00389412	0.0305113	9.00886	9.3364	9.63417	0.160688	0.148656	0.0829079
A_44_P250114	1.59758	1.55254	1.55814	1.53838	1.49339	1.52428	1.43033	1.42945	1.48957	0.00550351	0.0345209	1.56942	1.44978	1.51868	0.0245451	0.0344586	0.0230115
A_44_P250143	5.58713	5.5847	5.62093	5.7862	5.64603	5.85507	6.29237	5.96203	5.98275	0.00847312	0.0405946	5.59759	6.07905	5.76244	0.0202491	0.185032	0.106524
A_44_P250264	2.21624	1.93423	2.02038	1.85299	1.74307	1.98137	1.65565	1.57797	1.53491	0.00690774	0.0376502	2.05695	1.58951	1.85914	0.144518	0.0611924	0.119268
A_44_P250368	6.90054	7.32387	7.47945	6.30346	6.33506	6.67643	6.1219	6.53068	6.4454	0.00853789	0.0406661	7.23462	6.36599	6.43832	0.299593	0.215648	0.206815
A_44_P250439	3.65371	3.8921	3.46188	3.49145	2.73606	3.17582	4.38518	4.46027	4.13244	0.00497134	0.0330067	3.66923	4.32596	3.13444	0.215527	0.171752	0.379394
A_44_P250763	5.60804	5.15706	5.65202	5.55963	5.28863	5.67449	6.55282	6.29925	6.38833	0.00234722	0.0253901	5.47237	6.41346	5.50758	0.273951	0.128644	0.198126
A_44_P250839	13.7501	13.6401	13.7106	14.2554	14.3281	14.2321	14.1872	14.1982	14.0537	7.80249e-05	0.00758294	13.7003	14.1464	14.2719	0.0557512	0.0804265	0.0500923
A_44_P250873	1.54321	1.51232	1.50236	1.49135	1.44325	1.46287	1.38417	1.37693	1.44152	0.00567646	0.034846	1.5193	1.40087	1.46582	0.0212977	0.0353874	0.0241852
A_44_P251110	4.46001	5.48428	5.53918	3.99569	3.39898	3.34816	3.87104	3.31959	3.79482	0.00782171	0.039445	5.16115	3.66182	3.58094	0.607831	0.298814	0.360078
A_44_P251425	4.23558	4.79247	4.59558	4.77728	5.29277	5.028	6.0641	5.99267	5.55825	0.00274761	0.0273107	4.54121	5.87167	5.03268	0.282401	0.273769	0.257778
A_44_P251692	9.38925	9.07293	9.22784	8.82243	9.06326	8.78482	8.46212	8.59716	8.69614	0.00448288	0.0317573	9.23001	8.58514	8.89017	0.158171	0.117471	0.151073
A_44_P251756	8.62299	8.72249	8.58681	8.9288	8.88115	8.86071	8.85237	8.80524	8.82179	0.00176492	0.0222623	8.6441	8.82647	8.89022	0.0702569	0.0239115	0.0349405
A_44_P251867	2.32145	2.06008	2.57433	1.25923	1.25271	1.57524	1.76125	1.20044	1.29473	0.00588586	0.0353199	2.31862	1.41881	1.36239	0.257137	0.30029	0.184361
A_44_P252093	6.80994	6.90054	6.94152	7.08983	7.12206	7.03861	6.84751	6.81967	6.81988	0.00128471	0.0197575	6.884	6.82902	7.0835	0.067332	0.0160123	0.042082
A_44_P252390	7.91669	7.31673	7.47906	8.98872	8.76747	8.71974	8.33282	8.36585	8.45008	0.000736385	0.0157601	7.57083	8.38292	8.82531	0.310326	0.060464	0.143519
A_44_P252630	6.82632	7.68993	7.41888	4.86165	4.96012	5.25375	5.32667	5.34846	5.10908	0.000131553	0.00898541	7.31171	5.2614	5.02517	0.441665	0.132364	0.203985
A_44_P252678	10.3242	10.1296	9.9791	10.9234	10.6688	10.5445	10.6717	10.8106	10.728	0.00547466	0.0345209	10.1443	10.7368	10.7122	0.173004	0.0699074	0.193151
A_44_P252728	5.11978	5.01255	4.93066	4.73249	5.24408	5.4011	6.27199	6.1383	6.03314	0.00137795	0.0201644	5.021	6.14781	5.12589	0.0948448	0.119711	0.349621
A_44_P252841	8.92414	8.88557	9.00686	8.80098	8.81107	8.73223	8.74358	8.76809	8.77757	0.00546457	0.0345209	8.93886	8.76308	8.78143	0.0619697	0.0175387	0.0429005
A_44_P252871	2.17299	1.89665	1.99656	1.83468	1.73529	1.96429	1.63597	1.57044	1.52646	0.00713619	0.0380838	2.02207	1.57762	1.84475	0.139926	0.0551104	0.114835
A_44_P252921	8.70716	8.83486	8.35148	9.00415	9.21798	9.25045	9.30598	9.24623	9.47235	0.00664024	0.0370854	8.63117	9.34152	9.15753	0.250486	0.117175	0.133818
A_44_P252922	8.59955	8.73651	8.27173	9.16195	9.13959	9.1353	9.23426	9.16195	9.3673	0.00227095	0.0250911	8.53593	9.2545	9.14561	0.238829	0.104162	0.0143122
A_44_P253001	1.50673	1.47903	1.48657	1.49425	1.4464	1.45657	3.62837	3.14324	2.89398	8.58213e-05	0.00768794	1.49078	3.22186	1.46574	0.0143217	0.373455	0.0252059
A_44_P253059	8.21925	8.64997	8.78743	7.517	7.51127	7.61795	7.51216	7.82615	7.696	0.00152817	0.0210635	8.55222	7.6781	7.54874	0.296439	0.15776	0.0600046
A_44_P253108	4.27885	4.97718	4.84828	2.11015	2.42115	3.3395	3.01688	2.84088	2.99917	0.00216459	0.0245506	4.70144	2.95231	2.6236	0.371602	0.0969101	0.639191
A_44_P253268	10.137	9.97498	10.0701	10.4392	10.5962	10.3854	10.0023	10.0624	9.87353	0.00160483	0.0214045	10.0607	9.97939	10.4736	0.0814313	0.0964793	0.109525
A_44_P253601	4.70051	4.74137	4.76307	4.83302	4.89608	4.74106	4.21665	4.45327	4.40056	0.00129181	0.019783	4.73498	4.35683	4.82339	0.0317683	0.124228	0.0779564
A_44_P253725	1.33565	1.32749	1.3339	1.31664	1.34217	1.43431	5.76961	6.40741	5.01302	1.55149e-05	0.00400179	1.33235	5.73001	1.36437	0.00429872	0.698041	0.0618974
A_44_P254299	1.91834	1.7285	1.8062	1.71665	1.62579	1.76679	1.5612	1.53981	1.50554	0.00787559	0.0394941	1.81768	1.53552	1.70308	0.0954364	0.0280782	0.0714724
A_44_P254373	1.95109	1.78683	1.80281	1.74127	1.61322	1.68279	1.56515	1.54114	1.53572	0.00384099	0.0304511	1.84691	1.54734	1.67909	0.0905746	0.0156642	0.0641047
A_44_P254676	2.12818	1.87575	2.00388	1.80127	1.73322	1.84662	1.59198	1.53596	1.5071	0.00164086	0.0216657	2.0026	1.54501	1.7937	0.126222	0.0431545	0.0570793
A_44_P255084	2.66772	2.95543	2.03618	4.00316	4.01368	3.10438	2.06778	1.86669	1.82625	0.00505821	0.0333058	2.55311	1.92024	3.70707	0.47022	0.129361	0.521976
A_44_P255177	3.33035	2.78624	2.34146	3.07101	1.97969	3.39622	4.8733	4.42348	4.46001	0.00999438	0.0434696	2.81935	4.58559	2.81564	0.495273	0.249827	0.741992
A_44_P255694	3.0759	3.33796	2.67268	4.16538	4.02769	4.59523	4.9033	4.00316	4.44368	0.00619925	0.0361346	3.02885	4.45005	4.26277	0.335123	0.450101	0.29604
A_44_P255897	1.83633	1.71652	1.71996	1.67767	1.57195	1.6006	1.52347	1.51478	1.52915	0.00370845	0.0302875	1.7576	1.52247	1.61674	0.0682026	0.00723623	0.0546752
A_44_P255997	5.90704	6.05174	6.6222	4.9822	4.62338	4.76249	4.61894	4.92969	5.02732	0.00116709	0.0190192	6.19366	4.85865	4.78935	0.378116	0.213254	0.180911
A_44_P256132	1.5734	1.52001	1.54437	1.53137	1.48769	1.49339	1.43987	1.43814	1.46299	0.00455692	0.0319454	1.54593	1.447	1.50415	0.0267258	0.0138716	0.0237426
A_44_P256906	6.04626	6.30252	6.1152	6.44295	6.31973	6.38124	5.79817	5.91875	5.94871	0.00229513	0.0251255	6.15466	5.88855	6.38131	0.13261	0.0796847	0.061611
A_44_P256967	3.6289	3.666	3.49439	3.96092	3.8364	3.75115	3.0868	3.36602	3.33894	0.00289283	0.0275709	3.59643	3.26392	3.84949	0.0902917	0.153988	0.105495
A_44_P256973	8.42359	8.3917	8.50831	8.54781	8.60719	8.53646	8.66666	8.71788	8.81559	0.00294143	0.0277881	8.4412	8.73338	8.56382	0.0602628	0.0756639	0.0379887
A_44_P257058	4.57976	4.82367	4.60866	6.11546	6.54761	6.20428	5.9404	5.55202	6.08229	0.000267783	0.0112214	4.6707	5.85824	6.28912	0.133268	0.274518	0.228222
A_44_P257178	3.77021	2.71871	2.68334	2.90097	3.13441	3.02764	1.73008	1.62935	1.41209	0.00467062	0.0323236	3.05742	1.59051	3.02101	0.617547	0.162514	0.116865
A_44_P257670	1.55996	1.49896	1.70619	2.27357	2.49636	2.38152	1.52978	1.47615	1.72885	0.000224677	0.0104448	1.58837	1.57826	2.38382	0.106497	0.133145	0.111416
A_44_P257681	6.06469	5.91592	5.84479	5.68772	5.59756	6.00135	5.32647	5.35255	5.41535	0.00639086	0.0365459	5.9418	5.36479	5.76221	0.112209	0.0456839	0.21195
A_44_P257710	2.03213	1.80385	1.90192	1.77473	1.6856	1.88235	1.59564	1.55463	1.51163	0.00792135	0.0395771	1.91264	1.55397	1.78089	0.114517	0.042009	0.0985223
A_44_P257867	1.44687	1.74801	1.40541	2.32389	2.54476	2.94478	2.77371	4.2086	3.16617	0.00914506	0.0418286	1.53343	3.38283	2.60448	0.186984	0.741572	0.31472
A_44_P258147	1.76883	1.64572	1.66699	1.64154	1.552	1.58355	1.50286	1.50352	1.50813	0.00713816	0.0380838	1.69385	1.50483	1.59236	0.0658042	0.0028727	0.0454137
A_44_P258281	1.82727	1.66252	1.72611	1.66187	1.58137	1.65394	1.52444	1.5196	1.4992	0.00723704	0.0383399	1.73864	1.51441	1.63239	0.0830863	0.0133985	0.0443636
A_44_P258336	6.93654	7.29687	7.18415	7.95184	7.63337	7.8409	7.66779	7.60963	7.95747	0.00664116	0.0370854	7.13919	7.74496	7.80871	0.184325	0.186316	0.161658
A_44_P258693	1.84105	1.66956	1.74266	1.6697	1.59221	1.68088	1.5308	1.52347	1.49716	0.00752924	0.0388271	1.75109	1.51714	1.6476	0.0860573	0.0176919	0.0482918
A_44_P259078	1.72497	1.58053	1.73661	1.58232	1.58928	1.56964	1.87848	1.75353	1.86759	0.00847662	0.0405946	1.6807	1.8332	1.58041	0.0869452	0.0692127	0.0099591
A_44_P259595	5.36202	5.16662	5.29573	5.67006	5.64963	5.59998	5.48565	5.54148	5.3175	0.00781018	0.039445	5.27479	5.44821	5.63989	0.0993704	0.116586	0.0360377
A_44_P259926	10.4194	10.3804	10.4015	10.9043	10.827	10.7499	10.4989	10.582	10.6257	0.000348693	0.0122701	10.4004	10.5688	10.8271	0.0195404	0.0644216	0.0771895
A_44_P259931	6.53541	6.17629	6.64518	7.41329	7.14694	7.41708	6.8411	7.01024	7.31578	0.00701083	0.037899	6.4523	7.05571	7.32577	0.245245	0.240584	0.154886
A_44_P260369	1.33012	1.33278	1.34535	1.30845	1.3133	1.31911	1.29617	1.28332	1.31093	0.00762705	0.0391157	1.33609	1.29681	1.31362	0.00813445	0.0138159	0.00533572
A_44_P260514	1.66356	1.61486	1.60823	1.53739	1.51324	1.52388	1.46581	1.45972	1.50495	0.000592155	0.0142351	1.62888	1.47683	1.52483	0.0302109	0.0245449	0.0121049
A_44_P260598	8.0046	8.42905	8.17564	7.12171	7.34895	7.45275	7.46264	7.46579	7.20739	0.00150791	0.0209363	8.2031	7.37861	7.3078	0.213551	0.148289	0.16931
A_44_P260751	2.04466	1.84325	1.86328	1.78324	1.64692	1.75001	1.5958	1.55792	1.54114	0.00433013	0.0314203	1.91706	1.56495	1.72672	0.110953	0.0279972	0.071081
A_44_P260789	2.57074	2.99834	2.7735	1.78871	1.206	1.1926	1.17219	2.03531	1.93571	0.0075164	0.0388144	2.78086	1.7144	1.39577	0.213893	0.472203	0.340358
A_44_P260807	3.75789	3.17821	2.82543	2.72343	2.38322	2.69455	1.42513	1.68509	2.14955	0.00659305	0.0369861	3.25385	1.75326	2.6004	0.470808	0.366991	0.188636
A_44_P260850	6.44686	6.30863	6.59118	6.35648	6.41299	6.60091	6.12723	6.05561	5.98846	0.00900478	0.0416676	6.44889	6.0571	6.45679	0.141288	0.0693957	0.127966
A_44_P260891	5.13828	4.86431	5.16633	5.09127	5.03349	5.32596	4.61753	4.47606	4.56236	0.003717	0.0302911	5.05631	4.55198	5.15024	0.166867	0.0713006	0.154896
A_44_P261599	8.37855	8.49535	8.57298	8.15524	8.04703	8.33053	7.82362	7.70572	7.44916	0.00147614	0.0207674	8.48229	7.6595	8.1776	0.0978711	0.19146	0.143065
A_44_P261728	2.27023	1.98505	2.08422	1.84755	1.76525	1.90702	1.62371	1.54606	1.52882	0.00144265	0.0206388	2.11317	1.5662	1.83994	0.144778	0.0505462	0.0711902
A_44_P261761	6.72971	6.87856	6.95991	6.99744	7.06206	6.89944	7.64622	7.43695	7.3085	0.00265612	0.0268847	6.85606	7.46389	6.98631	0.11674	0.170465	0.0818785
A_44_P262049	3.02215	3.3022	2.58419	1.83533	1.80808	1.86144	1.58003	1.56741	1.47158	0.000393684	0.0125043	2.96951	1.53967	1.83495	0.361889	0.0593096	0.0266815
A_44_P262102	7.09723	7.10005	7.27491	6.63085	6.6434	6.57935	6.47842	6.39085	6.63476	0.000313199	0.0118912	7.1574	6.50134	6.61786	0.101779	0.123562	0.0339426
A_44_P262392	11.6274	11.6458	11.8682	11.1173	11.2355	11.3507	11.1819	11.2659	11.15	0.00191977	0.0232978	11.7138	11.1993	11.2345	0.134053	0.0598908	0.116705
A_44_P262798	3.6042	3.74635	3.64038	3.40291	3.0344	3.20588	1.87138	1.95709	2.4242	0.000221645	0.0104448	3.66365	2.08422	3.2144	0.073874	0.29753	0.184402
A_44_P262863	2.94687	3.79786	3.30856	3.70467	3.68459	3.93272	4.57665	4.56955	4.41669	0.00457632	0.0320385	3.3511	4.52096	3.77399	0.427087	0.0903731	0.137827
A_44_P262879	8.67113	8.84642	8.67806	8.61969	8.94154	9.04245	8.21377	8.13518	8.3145	0.00413382	0.0310296	8.73187	8.22115	8.86789	0.0992631	0.0898842	0.220793
A_44_P262977	7.37892	7.12333	7.4271	7.01024	7.09006	6.92775	6.83067	6.76285	6.85268	0.0040889	0.0308316	7.30978	6.8154	7.00935	0.163258	0.0468213	0.0811571
A_44_P263042	6.21752	5.96203	6.00381	5.63262	5.45993	5.82332	5.33254	5.27618	4.85739	0.0042594	0.0313241	6.06112	5.15537	5.63862	0.137048	0.259594	0.181771
A_44_P263168	3.93106	3.73292	3.59741	4.28703	4.07939	4.15538	3.78378	3.46501	3.58795	0.00831376	0.0402996	3.7538	3.61225	4.17394	0.167803	0.16077	0.105054
A_44_P263812	2.61851	2.09019	2.4824	1.99619	1.43847	1.29843	1.36295	1.23505	1.52337	0.00911713	0.0418125	2.39703	1.37379	1.5777	0.274313	0.144467	0.369128
A_44_P264208	12.3165	12.5114	12.3173	12.1014	12.2222	12.1778	11.975	11.9659	12.0756	0.00394353	0.0305339	12.3817	12.0055	12.1671	0.112298	0.0608971	0.0610818
A_44_P264211	11.8352	12.0965	11.8583	11.7498	11.7512	11.8168	11.5642	11.5987	11.5859	0.00802729	0.0397778	11.93	11.5829	11.7726	0.144629	0.0174211	0.0382902
A_44_P264481	1.90316	1.73349	1.87653	1.68239	1.65997	1.64581	1.5261	1.48915	1.46086	0.000940819	0.0176465	1.83773	1.49204	1.66272	0.0912488	0.0327149	0.0184444
A_44_P264518	16.7758	16.4599	16.6528	15.9999	15.915	16.0422	15.9687	15.9276	15.963	0.000267053	0.0112214	16.6295	15.9531	15.9857	0.159239	0.022274	0.0647521
A_44_P264558	11.241	11.0803	10.9911	10.8953	10.7623	10.7937	10.7487	10.5609	10.7784	0.0091115	0.0417995	11.1041	10.696	10.8171	0.12667	0.117971	0.0695222
A_44_P264837	9.57124	9.45486	9.75053	9.34917	8.73557	9.07561	8.84825	8.65665	8.7856	0.00709877	0.0380392	9.59221	8.7635	9.05345	0.14895	0.0976935	0.307399
A_44_P264880	10.3402	9.92623	9.29481	11.5041	11.7498	11.3847	11.166	10.9406	10.9303	0.00209533	0.0241625	9.85375	11.0123	11.5462	0.526461	0.133222	0.186127
A_44_P265058	5.28954	6.01851	6.0857	4.36596	4.3613	4.31409	4.58327	5.03325	5.06057	0.00289088	0.0275709	5.79792	4.89236	4.34711	0.441548	0.268032	0.0286982
A_44_P265209	4.99392	4.66114	4.53537	5.59891	5.58915	5.59604	5.58394	5.38674	5.30194	0.00130105	0.0197934	4.73014	5.42421	5.5947	0.236935	0.144687	0.00502005
A_44_P265237	3.63889	3.38464	3.50108	3.9234	3.91304	3.51311	4.34093	4.57689	4.61546	0.00110902	0.0189393	3.5082	4.51109	3.78318	0.127274	0.148624	0.233947
A_44_P265257	2.09552	1.86717	1.89952	1.80631	1.67255	1.81943	1.61698	1.56983	1.54167	0.00571569	0.0348864	1.95407	1.57616	1.7661	0.123559	0.0380515	0.0812783
A_44_P265366	5.83582	6.98178	7.02156	3.07331	2.74424	3.95273	2.83354	3.04499	3.66521	0.000553286	0.013883	6.61305	3.18125	3.25676	0.673397	0.432255	0.624783
A_44_P265374	6.70556	7.02988	6.88446	7.31648	7.27491	7.47154	7.0612	6.86334	7.05499	0.00916688	0.0418505	6.8733	6.99318	7.35431	0.162445	0.112489	0.103626
A_44_P265583	6.19062	6.13642	6.01234	6.13073	6.10944	6.3825	5.75074	5.72792	5.73133	0.00304749	0.0280471	6.11313	5.73666	6.20756	0.0913914	0.0123105	0.151881
A_44_P265846	1.67585	1.54481	1.59814	1.92817	2.03761	1.86589	1.58684	1.48458	1.61975	0.00151011	0.0209372	1.60626	1.56373	1.94389	0.0658965	0.0704902	0.0869349
A_44_P266340	7.46858	7.38026	7.31141	7.36711	7.40634	7.4434	7.61226	7.62518	7.59784	0.00297308	0.0278329	7.38675	7.61176	7.40562	0.0787846	0.0136767	0.0381477
A_44_P266400	10.5723	10.0303	10.0734	10.3951	10.3629	10.3734	9.49762	9.52124	9.76351	0.00572615	0.0349042	10.2253	9.59413	10.3771	0.30129	0.147169	0.0164079
A_44_P266833	4.47631	4.67224	4.92969	4.41967	4.07716	4.18852	3.89045	3.71599	3.51167	0.00269452	0.0271222	4.69274	3.70604	4.22845	0.227382	0.189586	0.174712
A_44_P267041	5.87364	6.57663	6.61602	5.0195	5.21107	5.11202	5.04787	5.25811	5.51739	0.0032921	0.0288686	6.35543	5.27446	5.1142	0.417706	0.235186	0.0958056
A_44_P267103	15.3218	15.1415	15.1055	15.4797	15.4797	15.5751	15.4535	15.6109	15.4209	0.00975734	0.0430374	15.1896	15.4951	15.5115	0.115913	0.101597	0.0551092
A_44_P267309	10.0427	9.88191	9.8776	10.1848	10.2234	10.1935	10.0909	10.0271	9.95876	0.00783265	0.039445	9.93407	10.0256	10.2006	0.094097	0.0661019	0.0202238
A_44_P267349	4.28761	4.39708	4.39312	4.41632	4.66089	4.51251	3.78638	3.86975	3.4739	0.00100881	0.0182645	4.35927	3.71001	4.52991	0.0620887	0.208686	0.123209
A_44_P267595	6.8695	6.88737	6.63162	7.02187	6.85621	6.96417	7.17043	7.15805	7.27713	0.00813223	0.0400455	6.79616	7.20187	6.94742	0.142781	0.0654701	0.0840905
A_44_P267660	1.37438	2.49872	1.36179	3.00395	3.75581	3.63707	1.38373	1.36344	1.27762	0.00242748	0.0258839	1.74497	1.34159	3.46561	0.652804	0.0563239	0.40419
A_44_P267687	1.71996	1.64542	1.63711	2.87813	1.82677	2.39342	4.74717	4.30792	3.0524	0.00702793	0.0379208	1.6675	4.03583	2.36611	0.0456239	0.879539	0.526213
A_44_P267799	6.72005	7.2745	6.906	7.28996	7.08748	7.24125	7.96188	8.40456	7.66124	0.00861528	0.0407992	6.96685	8.00923	7.20623	0.282191	0.373917	0.105687
A_44_P268381	3.10097	3.70395	3.18978	4.1946	4.29007	4.37427	3.36477	3.76861	3.23495	0.00703128	0.0379208	3.33157	3.45611	4.28631	0.325539	0.278307	0.0898921
A_44_P268864	9.44414	9.31269	9.57517	9.47277	9.55306	9.50092	9.17645	9.16236	8.92618	0.00810079	0.0399301	9.444	9.08833	9.50892	0.131239	0.140601	0.0407385
A_44_P269095	9.20932	9.41195	9.28373	9.8367	9.78978	9.92195	9.7548	9.86674	9.48184	0.00619775	0.0361346	9.30167	9.70113	9.84948	0.102496	0.197984	0.0670024
A_44_P269230	10.9756	10.9607	11.0448	11.1769	11.1417	11.1753	11.1482	11.155	11.048	0.00855948	0.040688	10.9937	11.1171	11.1646	0.0449037	0.0599298	0.0199035
A_44_P269566	7.89634	7.83286	8.09343	8.24103	8.17126	8.17331	7.51826	7.5873	7.19105	0.00196584	0.0233974	7.94088	7.4322	8.1952	0.135874	0.211678	0.0397072
A_44_P269649	2.23739	1.95521	2.00544	1.898	1.67797	1.89072	1.57249	1.54367	1.47917	0.00401712	0.0305832	2.06601	1.53178	1.82223	0.150526	0.0477859	0.124983
A_44_P269808	4.34889	4.53198	4.54408	4.75063	4.58076	4.4735	5.35854	5.32901	5.07757	0.000863344	0.0170428	4.47498	5.25504	4.60163	0.10937	0.154402	0.139739
A_44_P269950	5.09009	4.94617	4.94479	4.64534	4.6706	4.68384	4.74567	4.61609	4.65527	0.00102051	0.0183204	4.99368	4.67234	4.66659	0.0834911	0.066459	0.0195642
A_44_P270056	5.61812	5.67812	5.68809	5.67568	5.55484	5.78001	5.20594	5.19294	5.38279	0.0023957	0.0256505	5.66144	5.26056	5.67018	0.0378492	0.106057	0.112684
A_44_P270133	2.43604	2.43423	2.45464	2.12168	3.21019	2.6235	4.83853	3.98609	4.41483	0.00171906	0.0219617	2.44164	4.41315	2.65179	0.0112937	0.426226	0.544805
A_44_P270464	5.49148	5.46386	5.46658	5.84139	5.92646	5.78859	5.56448	5.32792	5.51597	0.00195462	0.0233704	5.47397	5.46946	5.85215	0.0152247	0.124951	0.0695644
A_44_P270769	2.96097	2.95992	2.80327	1.59063	2.0329	1.62247	1.67616	1.7458	1.84755	0.000159197	0.00952635	2.90806	1.7565	1.74867	0.0907488	0.0861961	0.246665
A_44_P271018	12.6704	12.6134	12.6328	13.4353	13.3991	13.5337	13.3779	13.3005	13.1341	5.09518e-05	0.00624268	12.6389	13.2708	13.456	0.0289712	0.124549	0.0696424
A_44_P271353	1.80465	1.68524	1.69365	1.66502	1.5612	1.59103	1.51262	1.50913	1.52273	0.00550338	0.0345209	1.72784	1.51483	1.60575	0.0666479	0.00706452	0.0534511
A_44_P271423	6.04203	6.45065	6.11932	5.56686	5.47858	5.28933	5.35154	5.47767	5.08737	0.00231266	0.0252536	6.204	5.30553	5.44493	0.217072	0.199176	0.141791
A_44_P271435	5.58836	4.86738	4.81612	1.21525	1.85888	2.39253	1.94481	3.86394	3.10184	0.00344735	0.0294423	5.09062	2.9702	1.82222	0.431818	0.966315	0.589497
A_44_P271643	9.80872	10.0231	10.0449	9.22349	9.36625	9.41277	9.56221	9.38588	9.67661	0.00257067	0.0264552	9.9589	9.54156	9.33417	0.130513	0.146458	0.0986311
A_44_P272045	3.36714	2.78602	2.81475	1.55599	2.40672	1.58982	1.4804	1.51163	1.42659	0.00367676	0.0301559	2.9893	1.47287	1.85085	0.327534	0.0430185	0.4817
A_44_P272212	1.35303	1.81959	1.34385	2.91531	4.08211	3.48892	3.14839	2.75964	3.31309	0.0022236	0.0248804	1.50549	3.07371	3.49545	0.272061	0.284184	0.583428
A_44_P272312	2.04842	1.825	1.88166	1.79303	1.66754	1.85224	1.60709	1.5692	1.53016	0.00865012	0.0408519	1.91836	1.56882	1.77094	0.11614	0.0384675	0.0943087
A_44_P272353	7.61675	7.45247	7.57878	7.86721	7.90451	7.99101	7.58159	7.50726	7.74562	0.00595306	0.0355095	7.54933	7.61149	7.92091	0.0860103	0.121959	0.0635062
A_44_P272393	6.73498	7.4035	6.8676	4.90633	5.04787	5.56818	5.17355	6.18663	5.55222	0.0039532	0.0305339	7.00203	5.63746	5.17413	0.353954	0.511892	0.348525
A_44_P272847	6.81833	6.45133	6.71626	6.26274	6.08886	6.25441	5.70258	5.64324	5.93552	0.00106622	0.0187215	6.66197	5.76044	6.202	0.189426	0.154493	0.0980746
A_44_P273918	1.51423	1.46017	1.4736	1.99805	1.90056	1.83995	1.51296	1.41435	1.54321	0.000220483	0.0104448	1.48267	1.49017	1.91285	0.0281444	0.067387	0.0797606
A_44_P273948	3.9393	3.5653	3.61169	3.24166	3.32382	2.53904	4.23717	4.50466	4.77478	0.00377259	0.0303318	3.70543	4.50554	3.03484	0.203862	0.268807	0.431337
A_44_P274362	5.69764	5.76172	5.79028	6.57508	6.54819	6.42411	6.18898	6.34518	6.12799	9.34889e-05	0.00795467	5.74988	6.22072	6.51579	0.0474405	0.112021	0.0805329
A_44_P274550	8.32708	8.53593	8.60601	8.00606	8.03071	7.99556	7.97979	8.0821	8.2229	0.00380454	0.0303606	8.48967	8.09493	8.01078	0.145106	0.122063	0.0180437
A_44_P274650	5.59008	5.5145	5.75361	5.14732	5.07009	5.18467	4.77942	5.10908	4.90119	0.00130269	0.0197934	5.61939	4.9299	5.13403	0.122222	0.166693	0.0584364
A_44_P274716	10.1621	9.97551	10.2875	9.62263	9.62742	9.78179	9.50655	9.3183	9.2859	0.000834859	0.0167903	10.1417	9.37025	9.67728	0.156992	0.119146	0.090543
A_44_P274772	3.43303	3.50565	3.44573	3.10733	3.22251	3.13701	3.74124	3.76895	3.6613	3.49994e-05	0.00574208	3.46147	3.72383	3.15562	0.0387799	0.0558966	0.059803
A_44_P275470	1.67701	1.60209	1.60909	1.59153	1.52591	1.54642	1.47008	1.4674	1.51141	0.00549948	0.0345209	1.6294	1.48296	1.55462	0.0413809	0.0246736	0.0335651
A_44_P276317	6.96837	7.05425	7.01572	6.68185	6.48495	6.61928	6.09814	5.74135	6.2842	0.001331	0.0199717	7.01278	6.04123	6.59536	0.043017	0.275866	0.100608
A_44_P276338	5.36753	5.31903	5.36122	2.81686	3.62753	3.79887	2.76194	3.07711	2.93007	0.000189382	0.0100285	5.34926	2.92304	3.41442	0.026373	0.157701	0.524547
A_44_P276504	2.96556	2.51827	2.73204	2.93605	2.89947	3.13611	1.90454	2.24918	2.23985	0.00350168	0.0295535	2.73862	2.13119	2.99054	0.223716	0.196336	0.127383
A_44_P276562	6.78254	6.6497	6.98356	6.86994	6.71679	7.02232	6.2963	6.37464	6.12392	0.0049616	0.0330067	6.80526	6.26495	6.86968	0.168088	0.128266	0.152764
A_44_P276793	3.6111	2.52485	2.60832	3.07077	2.98509	3.30533	5.41691	5.23796	4.46241	0.0025365	0.0263514	2.91476	5.03909	3.1204	0.604494	0.507374	0.16579
A_44_P277010	10.5623	10.427	10.5793	10.4477	10.7029	10.5776	10.9965	10.821	10.8801	0.00806507	0.0398459	10.5229	10.8992	10.5761	0.0834469	0.0893036	0.127576
A_44_P277126	6.6013	6.19747	6.47147	6.86516	7.35655	6.88118	7.57439	7.37493	7.22676	0.00520593	0.0338024	6.42341	7.39203	7.0343	0.206163	0.174444	0.279192
A_44_P277340	8.71747	8.30002	8.46258	9.6167	9.64085	9.14295	9.41234	9.2297	9.15131	0.00345842	0.0294697	8.49336	9.26445	9.46683	0.210419	0.133943	0.280752
A_44_P278179	2.02634	1.80581	1.92503	1.76136	2.0266	1.82883	1.5797	1.53527	1.4985	0.00825074	0.0401902	1.91906	1.53782	1.87226	0.110389	0.0406599	0.137853
A_44_P278439	4.97031	4.97089	4.89288	5.21773	5.18096	5.21969	5.082	5.14223	5.26082	0.00372362	0.0302911	4.94469	5.16168	5.20613	0.0448725	0.0909848	0.0218201
A_44_P278701	11.5311	10.7348	11.4393	10.0833	9.79331	9.99903	10.2951	9.86707	9.91095	0.00318866	0.0286137	11.2351	10.0244	9.95855	0.435647	0.235461	0.149183
A_44_P278770	5.13177	4.86111	5.08791	5.56953	5.37323	5.45935	4.97524	4.95625	5.10228	0.0037733	0.0303318	5.02693	5.01126	5.46737	0.145266	0.0793989	0.0983919
A_44_P278938	5.76332	6.0397	5.96262	6.13321	5.81942	5.96552	7.11771	7.09006	7.24019	4.0338e-05	0.00576278	5.92188	7.14932	5.97272	0.142623	0.0799	0.157019
A_44_P279083	4.793	4.30928	4.24155	4.68276	4.7288	5.0737	3.02872	3.34296	3.70467	0.0019771	0.0233999	4.44794	3.35878	4.82842	0.30074	0.338254	0.213662
A_44_P279285	4.26974	4.3151	4.2669	3.75299	3.77584	4.00647	3.46294	3.61945	3.00115	0.00426755	0.0313241	4.28391	3.36118	3.8451	0.0270474	0.321465	0.140216
A_44_P280005	5.09073	5.03543	4.87992	4.664	4.97031	4.83761	4.51745	4.14306	4.16725	0.00379967	0.0303606	5.00203	4.27592	4.82397	0.109301	0.20952	0.153608
A_44_P280445	3.60943	3.65479	3.01968	4.76249	4.19518	4.41871	4.31229	4.24718	4.08629	0.00826844	0.0402394	3.42797	4.21525	4.4588	0.354314	0.11633	0.285771
A_44_P280898	13.333	13.3478	13.3603	12.5633	12.2415	12.0874	11.1534	11.9037	11.2651	0.000428582	0.0127976	13.347	11.4408	12.2974	0.013651	0.4048	0.242796
A_44_P280963	4.16888	4.84379	5.36422	1.34766	1.32458	2.38195	1.36723	1.36235	1.63357	0.000299992	0.01177	4.7923	1.45438	1.68473	0.599333	0.155196	0.603922
A_44_P281248	1.94207	1.74567	1.82641	1.7294	1.63671	1.80171	4.02723	4.05909	4.08426	3.72746e-08	0.000139407	1.83805	4.05686	1.72261	0.0987186	0.0285818	0.082713
A_44_P281481	15.0305	14.9149	15.1916	14.6861	14.7003	14.5716	14.804	14.683	14.5757	0.00903018	0.0416911	15.0457	14.6876	14.6527	0.138974	0.114175	0.0705977
A_44_P281710	4.83319	4.60263	4.89323	5.09279	4.99158	4.99739	4.39312	4.45933	4.51424	0.00133056	0.0199717	4.77635	4.45556	5.02725	0.153412	0.0606461	0.0568313
A_44_P281772	5.48242	5.3858	4.97322	5.02831	4.84566	5.08086	4.25733	4.3095	4.70782	0.00904477	0.0416911	5.28048	4.42488	4.98494	0.270447	0.246416	0.123454
A_44_P282462	7.54523	7.32129	7.50463	7.05591	6.906	6.99487	6.72005	6.59864	7.01323	0.00352955	0.0295976	7.45705	6.77731	6.9856	0.119311	0.213145	0.0753847
A_44_P282705	2.76574	2.05272	2.67507	4.30402	4.08607	3.92665	3.76743	4.17615	3.5522	0.00150061	0.0209226	2.49784	3.83193	4.10558	0.388141	0.316936	0.189439
A_44_P283111	2.34336	2.50308	2.76036	2.49744	3.02695	3.15478	4.00704	3.67158	3.72142	0.00244703	0.0259781	2.5356	3.80001	2.89305	0.210394	0.181015	0.348523
A_44_P283385	4.75154	4.83587	4.01578	4.77404	4.79568	4.88872	5.68186	5.61288	5.59638	0.0055884	0.0346536	4.5344	5.63037	4.81948	0.451111	0.0453469	0.060931
A_44_P283449	8.04159	7.92153	8.24914	8.31858	8.50097	8.23666	7.80292	7.72334	7.7315	0.00338729	0.0292156	8.07075	7.75259	8.35207	0.165742	0.0437798	0.135298
A_44_P283726	7.42553	8.57246	8.09904	4.98114	5.19394	5.25953	5.44073	5.98898	5.41105	0.000215303	0.0104448	8.03235	5.61359	5.14487	0.576368	0.325437	0.145536
A_44_P283819	7.06272	7.30501	7.09955	8.41043	8.2352	7.90322	8.32131	8.54571	8.70716	0.00039834	0.012549	7.15576	8.52473	8.18295	0.130559	0.193779	0.257613
A_44_P284145	2.2065	1.93542	1.98839	1.84514	1.72284	2.31459	3.81977	3.77674	4.3515	0.00015063	0.00935029	2.04344	3.98267	1.96085	0.143679	0.320139	0.312389
A_44_P284200	10.6693	11.6128	11.5	8.00425	8.47354	9.01872	9.05642	8.90306	8.556	0.000505458	0.0135271	11.2607	8.8385	8.49884	0.515266	0.256385	0.507704
A_44_P284250	2.16342	2.77857	2.75964	3.469	3.78733	3.41862	4.17189	4.28593	4.0395	0.000578484	0.0142163	2.56721	4.16577	3.55832	0.349818	0.123327	0.199926
A_44_P284625	2.03154	1.8094	1.87992	1.78249	1.66956	1.86759	1.60046	1.56393	1.52203	0.00943626	0.0424878	1.90695	1.56214	1.77321	0.11351	0.0392461	0.0993416
A_44_P284698	12.4387	12.4031	12.3295	12.5902	12.8413	12.6028	12.2515	11.8944	12.1626	0.00670715	0.0373285	12.3905	12.1028	12.6781	0.0556891	0.185933	0.141454
A_44_P285463	8.36838	7.25681	8.15084	9.21041	9.00336	9.32884	9.3116	9.2979	9.19373	0.00609375	0.0358907	7.92535	9.26774	9.18087	0.589096	0.0644636	0.164736
A_44_P285517	10.2036	10.2457	10.2194	10.6307	10.5341	10.4989	10.5093	10.6196	10.5828	0.000297653	0.01175	10.2229	10.5706	10.5545	0.0212491	0.0562079	0.0682483
A_44_P285615	1.51535	1.49191	1.4663	1.45367	1.39506	1.38606	1.35414	1.34581	1.3982	0.00639309	0.0365459	1.49118	1.36605	1.4116	0.024533	0.0281553	0.036712
A_44_P285786	1.59204	2.14099	2.71902	3.40699	4.05138	4.13797	3.58979	3.82187	4.4677	0.00585568	0.035208	2.15068	3.95979	3.86545	0.563549	0.454914	0.399391
A_44_P285958	2.11289	1.8592	1.97471	1.8066	1.7218	1.90914	1.61121	1.55346	1.51495	0.0047041	0.0324553	1.98227	1.55987	1.81251	0.127013	0.0484507	0.0938099
A_44_P286087	11.53	11.5894	11.4861	11.4988	11.3364	11.4963	11.1688	11.2444	11.2754	0.00431393	0.0314203	11.5351	11.2295	11.4438	0.051842	0.0548499	0.0930711
A_44_P286409	5.73543	6.69247	6.70098	2.17523	1.50214	2.53771	1.5787	1.64572	3.69128	0.00110387	0.0189033	6.37629	2.30523	2.07169	0.555022	1.20082	0.525491
A_44_P286573	5.99852	5.97677	5.82202	5.9299	5.88774	6.0182	5.5145	5.59478	5.5128	0.000754249	0.0160278	5.93244	5.54069	5.94528	0.096237	0.0468473	0.0665745
A_44_P286703	1.26921	1.27669	1.26902	2.0845	2.70295	2.48123	1.67821	1.94809	1.66308	0.00133599	0.0199867	1.27164	1.76313	2.4229	0.00437753	0.160364	0.313324
A_44_P287366	3.58714	3.41731	3.64614	3.87841	3.45197	3.90119	2.99996	2.95406	2.89417	0.00250905	0.0262571	3.5502	2.94939	3.74386	0.118807	0.0530491	0.253037
A_44_P287634	1.41204	1.3903	1.41509	1.37723	1.37703	1.37947	1.34908	1.33851	1.35004	0.000459277	0.0132783	1.40581	1.34588	1.37791	0.0135208	0.00639957	0.00135257
A_44_P287655	1.34505	2.04592	1.34056	1.33311	1.57322	1.33084	3.44695	2.84178	2.99582	0.000966248	0.0178497	1.57718	3.09485	1.41239	0.405948	0.314504	0.13929
A_44_P287766	8.01177	7.8232	8.205	7.6594	7.81983	7.64347	7.54835	7.53086	7.46027	0.00818421	0.0401518	8.01333	7.51316	7.70757	0.190904	0.0466359	0.0975515
A_44_P287782	3.92193	3.71599	3.58795	3.79848	3.8145	3.77021	2.7231	2.50466	2.5017	2.88875e-05	0.00517045	3.74196	2.57649	3.7944	0.168497	0.126983	0.0224292
A_44_P287847	1.2091	1.22053	1.20782	1.21834	1.19148	1.25978	1.73476	1.47748	1.8707	0.00360152	0.0297847	1.21248	1.69431	1.2232	0.0069984	0.199704	0.0344118
A_44_P288291	6.16047	6.25004	6.66397	8.94154	8.51235	9.2015	8.87931	9.14079	8.79255	3.76473e-05	0.00576278	6.35816	8.93755	8.88513	0.268599	0.181275	0.348023
A_44_P288512	1.57432	1.51102	1.55266	1.52125	1.49503	1.51543	1.4452	1.44234	1.44419	0.00230477	0.0252042	1.546	1.44391	1.51057	0.0321734	0.00145166	0.0137679
A_44_P288585	1.51058	1.48264	1.49034	1.49785	1.45025	1.46044	1.79945	1.96296	2.13709	0.00136512	0.0200773	1.49452	1.9665	1.46952	0.0144296	0.168848	0.0250649
A_44_P288785	3.79076	4.0343	4.36999	4.46421	4.07293	4.3048	6.16172	5.64776	5.44303	0.000817064	0.0166213	4.06502	5.75084	4.28065	0.290835	0.37027	0.196753
A_44_P288899	4.07518	4.16343	3.66252	2.58099	3.7664	3.85407	1.93945	2.37878	1.92147	0.00646841	0.0367328	3.96704	2.0799	3.40049	0.267392	0.258992	0.711055
A_44_P288982	7.52421	7.30641	7.41225	7.14848	6.91976	7.29799	6.85933	6.35049	6.2671	0.00630439	0.0363864	7.41429	6.49231	7.12208	0.108915	0.320574	0.190491
A_44_P289378	6.48116	6.48913	6.59665	7.5475	7.31273	7.01949	7.52225	7.57623	7.54013	0.0005254	0.0137075	6.52231	7.5462	7.29324	0.0645022	0.0274976	0.264546
A_44_P289424	12.4785	12.3666	12.3597	12.6679	12.6056	12.6981	12.6606	12.5705	12.6178	0.00237014	0.0254905	12.4016	12.6163	12.6572	0.0667052	0.0450473	0.0471591
A_44_P289600	2.14397	1.89556	1.93711	1.82715	1.69563	1.87595	1.63575	1.5792	1.57607	0.00688832	0.0376502	1.99221	1.59701	1.79958	0.133056	0.0335913	0.0932692
A_44_P289652	1.86717	1.6802	1.80306	1.67394	1.62603	1.72778	1.57488	1.51662	1.47455	0.00988571	0.0432175	1.78348	1.52202	1.67592	0.0950147	0.0503827	0.050904
A_44_P290074	7.04089	6.94402	6.85956	9.54203	8.67806	8.54938	7.79292	9.32843	8.9412	0.00948494	0.0425857	6.94815	8.68751	8.92315	0.0907354	0.798568	0.53981
A_44_P290139	13.0107	13.1119	12.9881	12.6241	12.5016	12.5592	12.6299	12.828	12.8086	0.00114631	0.0190044	13.0369	12.7555	12.5616	0.0659142	0.109206	0.0612775
A_44_P290296	2.20515	1.94021	1.98279	1.8409	1.71793	1.89599	1.65238	1.58003	1.54488	0.00507514	0.0333674	2.04272	1.59243	1.81827	0.14227	0.0548123	0.0911633
A_44_P290391	4.3419	3.95219	3.87693	3.79575	3.99125	3.89778	4.85116	4.97603	4.99003	0.000435565	0.0129275	4.057	4.93907	3.89493	0.249578	0.0764519	0.0977831
A_44_P290519	8.65111	8.64315	8.6479	9.03968	8.93436	9.16017	8.69957	8.66156	8.6479	0.000567843	0.0141112	8.64739	8.66968	9.04474	0.00400414	0.026774	0.112992
A_44_P290734	4.90019	4.96799	4.73004	5.11202	5.16787	4.5789	4.1126	3.6777	4.06426	0.00419438	0.0312023	4.86607	3.95152	4.95293	0.12259	0.238364	0.325118
A_44_P290743	2.26873	1.98054	2.05708	1.86793	1.75556	1.95844	1.65816	1.57123	1.54028	0.0037801	0.0303318	2.10212	1.58989	1.86064	0.149283	0.0611139	0.101636
A_44_P290823	16.4079	16.3565	16.4079	16.4675	16.4675	16.4477	16.4844	16.4844	16.5543	0.00832907	0.0402996	16.3908	16.5077	16.4609	0.0296862	0.0403683	0.0114154
A_44_P290879	12.4031	12.6087	12.4467	12.0578	12.1665	12.1902	11.9785	12.1719	11.9895	0.00338482	0.0292156	12.4862	12.0466	12.1382	0.108295	0.108607	0.0705719
A_44_P290936	9.1577	8.94545	8.84916	9.69488	9.69234	9.6815	9.47099	9.60422	9.44915	0.000399712	0.0125624	8.9841	9.50812	9.68957	0.157859	0.0839376	0.00710685
A_44_P290992	7.81326	8.17207	7.81523	6.98015	6.8494	7.40753	7.40496	7.06332	7.12206	0.00804843	0.0398134	7.93352	7.19678	7.07903	0.206594	0.182666	0.291905
A_44_P291175	5.19517	6.19908	5.9638	2.4184	2.88908	2.84114	3.07077	3.56817	3.4226	0.000119732	0.00861147	5.78602	3.35384	2.71621	0.525039	0.255727	0.259018
A_44_P291235	1.66832	1.61669	1.61121	1.54401	1.516	1.52778	1.46753	1.46205	1.50673	0.000700541	0.0153442	1.63207	1.47877	1.52927	0.0315121	0.0243689	0.0140641
A_44_P291408	3.72307	3.38514	3.87041	4.29601	3.80676	4.36276	3.12565	3.00929	3.149	0.00401665	0.0305832	3.65954	3.09465	4.15517	0.248796	0.0748384	0.303577
A_44_P291755	2.30623	2.17102	2.25978	2.4923	2.89357	2.58781	3.29735	2.95491	2.90342	0.00428016	0.0313571	2.24568	3.05189	2.65789	0.0686972	0.214128	0.209613
A_44_P292462	3.25515	2.40229	1.96345	3.78068	3.39048	3.93106	4.55241	4.0575	4.50647	0.00630976	0.0363894	2.54029	4.37213	3.70074	0.656815	0.273438	0.279016
A_44_P292529	1.50638	1.45739	1.50437	1.46139	1.46392	1.4964	1.41395	1.40029	1.39034	0.00437514	0.0314732	1.48938	1.40152	1.47391	0.0277224	0.0118548	0.0195246
A_44_P293213	4.81762	4.66555	4.81471	5.08791	5.05299	4.80956	4.38148	4.423	4.49302	0.00206809	0.0240446	4.76596	4.4325	4.98349	0.0869744	0.056371	0.151635
A_44_P293512	3.21927	3.04291	2.88769	3.51709	3.46701	3.30878	2.0773	2.01935	1.95628	1.78036e-05	0.00425378	3.04996	2.01764	3.43096	0.165903	0.0605282	0.108733
A_44_P294642	1.63639	1.53334	1.59637	1.54816	1.52484	1.55773	1.46964	1.46634	1.45212	0.00809429	0.0399134	1.5887	1.4627	1.54358	0.0519509	0.00931196	0.016917
A_44_P294675	10.2011	11.5537	11.0198	8.87058	8.96859	9.17188	9.58843	10.0921	10.5793	0.00906605	0.0416969	10.9249	10.0866	9.00368	0.681278	0.495464	0.153683
A_44_P295350	2.0466	1.82071	1.94763	1.76618	1.70649	1.81703	1.57821	1.53148	1.49759	0.0019709	0.023399	1.93831	1.53576	1.76323	0.11323	0.0404796	0.0553279
A_44_P295654	5.64349	5.63642	5.50258	5.74906	5.76442	5.68373	5.2201	5.21586	4.86348	0.0022492	0.0249986	5.59416	5.09981	5.7324	0.0793939	0.204679	0.0428433
A_44_P295680	7.18643	7.70572	7.56092	6.63557	6.61432	6.50235	7.1277	7.58058	7.24473	0.00418395	0.0311989	7.48436	7.31767	6.58408	0.267976	0.235087	0.0715743
A_44_P296468	7.02921	7.60287	6.94759	6.48435	6.08919	6.41357	5.8982	6.14257	6.08375	0.0032833	0.0288252	7.19322	6.04151	6.32903	0.357107	0.12754	0.210706
A_44_P296570	6.34054	6.51337	6.43905	6.52771	6.46523	6.41767	6.64809	6.77936	6.70358	0.00568186	0.0348576	6.43099	6.71034	6.47021	0.0866967	0.0658993	0.0551879
A_44_P296907	2.22384	1.95042	2.00184	1.85074	1.72979	1.92926	1.65997	1.58232	1.54426	0.00557039	0.0346444	2.0587	1.59552	1.8366	0.145306	0.058972	0.100481
A_44_P296924	7.92518	7.85398	7.70033	8.18918	8.21233	8.07058	7.75495	7.82907	7.80026	0.00299818	0.027879	7.8265	7.79476	8.15736	0.114916	0.0373633	0.0760427
A_44_P297167	4.25493	3.8855	4.38342	4.36859	3.86351	4.64928	5.38547	5.18956	5.27393	0.00532819	0.0342476	4.17462	5.28299	4.29379	0.258493	0.0982685	0.398188
A_44_P297208	3.0541	3.3218	2.93251	3.16395	2.83289	2.77958	1.52572	2.34504	1.81974	0.00467137	0.0323236	3.1028	1.89683	2.92547	0.199161	0.415062	0.20824
A_44_P297326	1.53838	1.49598	1.52105	1.50469	1.46909	1.47395	1.42292	1.41858	1.44612	0.00320299	0.0286544	1.51847	1.42921	1.48258	0.0213186	0.0148066	0.0193047
A_44_P297446	2.13563	1.87772	1.94309	1.8277	1.70335	1.92456	1.63778	1.58289	1.53686	0.00974323	0.0430111	1.98548	1.58584	1.81854	0.134076	0.0505215	0.110889
A_44_P297492	1.51972	1.48047	1.50587	1.48321	1.45767	1.4644	1.41271	1.40653	1.43176	0.00169273	0.0219439	1.50202	1.417	1.46842	0.0199058	0.0131478	0.0132355
A_44_P297571	2.18545	1.91642	1.97107	1.84007	1.71652	1.92657	1.65208	1.58567	1.54186	0.00773154	0.039337	2.02432	1.5932	1.82772	0.1422	0.0554936	0.105569
A_44_P297619	11.3195	11.4538	11.6526	10.8741	10.9814	11.0379	11.1227	11.1409	11.1637	0.00333839	0.0290814	11.4753	11.1425	10.9645	0.16762	0.0205582	0.0832227
A_44_P297659	7.3085	7.45452	7.61423	7.1018	6.75588	6.79349	6.81728	6.68385	6.25935	0.00758646	0.0390146	7.45909	6.58683	6.88372	0.152917	0.291339	0.189794
A_44_P297763	1.38865	2.66405	1.50855	2.39277	4.21242	3.6457	5.13737	4.4822	4.74086	0.00638705	0.0365459	1.85375	4.78681	3.41696	0.704298	0.329996	0.931139
A_44_P297818	3.99969	5.0624	5.1028	1.98581	2.76654	2.49157	3.28384	3.2251	3.05471	0.00171395	0.0219617	4.72163	3.18788	2.41464	0.625544	0.11901	0.396008
A_44_P297880	6.87979	6.85448	7.34241	6.93255	6.60816	6.50585	6.22421	6.04178	5.83475	0.00548851	0.0345209	7.02556	6.03358	6.68219	0.274694	0.194859	0.222769
A_44_P297963	2.45617	2.25055	2.29487	2.92298	2.13675	4.47086	5.44596	5.10692	5.81289	0.00449934	0.0317573	2.33386	5.45525	3.17686	0.108212	0.353077	1.18759
A_44_P298036	1.59433	1.54943	1.55599	1.53927	1.49288	1.52371	1.42928	1.42793	1.48971	0.00639096	0.0365459	1.56658	1.44898	1.51862	0.0242488	0.0352844	0.023612
A_44_P298688	4.72303	4.78986	4.45844	5.73309	5.77664	5.38301	5.58418	5.61117	5.63812	0.000464314	0.0132959	4.65711	5.61115	5.63091	0.175269	0.0269683	0.215791
A_44_P299064	4.07939	4.78138	4.87528	3.10953	3.04875	2.53376	2.99969	3.59896	2.69765	0.00449193	0.0317573	4.57868	3.09877	2.89735	0.43494	0.458754	0.316337
A_44_P299657	1.80051	1.65533	1.69982	1.65035	1.56812	1.61642	1.51423	1.51385	1.50326	0.006132	0.0359987	1.71855	1.51044	1.61163	0.0743829	0.0062268	0.0413232
A_44_P299722	4.40175	4.22717	4.39813	3.92799	4.03643	3.98773	3.06302	3.54675	3.19904	0.000464823	0.0132959	4.34235	3.26961	3.98405	0.0997663	0.249462	0.0543111
A_44_P299749	8.05013	7.7911	7.7424	6.48116	6.79289	6.82049	5.94899	5.90015	5.85809	1.03903e-05	0.00340502	7.86121	5.90241	6.69818	0.165414	0.045495	0.188455
A_44_P299799	1.52537	1.47974	1.51611	1.48382	1.46871	1.49154	1.42225	1.41442	1.42122	0.00123784	0.0195766	1.50707	1.4193	1.48136	0.02412	0.00425837	0.0116136
A_44_P299933	4.01864	5.10228	5.14392	1.38709	1.36498	2.21727	1.29528	1.52997	1.81868	0.000297678	0.01175	4.75495	1.54798	1.65645	0.638001	0.262166	0.485816
A_44_P300151	1.80499	1.70251	1.69563	1.64111	1.55593	1.57195	1.51123	1.50178	1.52821	0.0025668	0.0264552	1.73438	1.51374	1.58966	0.0612473	0.0133892	0.0452671
A_44_P300314	1.55925	1.49513	1.58355	1.50829	1.52633	1.53756	1.44782	1.42115	1.39577	0.00622557	0.0361924	1.54598	1.42158	1.52406	0.0456815	0.0260267	0.0147682
A_44_P300788	3.38873	3.46527	2.78018	1.25646	2.19981	2.35409	1.7719	1.38873	1.55086	0.00714716	0.038091	3.21139	1.5705	1.93679	0.375397	0.192339	0.594207
A_44_P300818	8.04468	8.09929	7.80568	8.63168	8.53166	8.58868	8.43893	8.50611	8.54051	0.000629547	0.0145937	7.98322	8.49518	8.58401	0.15616	0.0516619	0.0501764
A_44_P301184	1.6006	1.59204	1.54795	1.45763	1.44813	1.42945	1.41888	1.41823	1.43583	0.000116292	0.00853559	1.5802	1.42431	1.44507	0.028249	0.00997627	0.0143359
A_44_P301695	9.4382	9.39928	9.53126	9.78096	9.60153	9.69198	9.43086	9.46928	9.49124	0.00825565	0.0401902	9.45625	9.46379	9.69149	0.0678148	0.0305605	0.0897185
A_44_P301922	1.812	1.64088	1.76333	1.63575	1.60696	1.67725	1.51986	1.50288	1.46074	0.00584443	0.035208	1.73874	1.49449	1.63999	0.0881744	0.0304358	0.0353358
A_44_P302225	5.46932	5.40678	5.30582	5.77866	5.71773	6.09918	4.98114	4.85025	5.38626	0.0092854	0.0421449	5.39398	5.07255	5.86519	0.0825001	0.27945	0.204917
A_44_P302383	13.6303	13.5597	13.6001	13.7501	13.7211	13.7522	13.7846	13.7931	13.7249	0.00111937	0.0190044	13.5967	13.7675	13.7411	0.0354267	0.0371715	0.0173746
A_44_P302399	1.53527	1.51347	1.48553	1.46572	1.41093	1.40704	1.37038	1.36286	1.41167	0.0037557	0.0303318	1.51142	1.38164	1.42789	0.0249359	0.0262764	0.032815
A_44_P302536	9.47448	9.35237	9.20834	8.84441	8.97318	8.96162	8.8366	8.88602	9.06204	0.00530403	0.0342018	9.34506	8.92822	8.9264	0.133219	0.118496	0.0712466
A_44_P302599	4.12861	4.05994	4.03516	3.67328	3.62204	3.27319	3.36217	2.74591	2.68638	0.0042641	0.0313241	4.07457	2.93149	3.52284	0.0484159	0.374167	0.217715
A_44_P302923	5.65202	5.59404	5.63606	5.97566	6.02601	6.09021	6.62463	6.164	6.46469	0.00139145	0.0202491	5.62737	6.41777	6.03063	0.0299526	0.233876	0.0574141
A_44_P303336	2.25328	1.98218	2.0227	1.90738	1.67715	1.86124	1.55725	1.52947	1.47718	0.00255017	0.02642	2.08605	1.5213	1.81526	0.146232	0.0406529	0.121811
A_44_P303486	2.14864	1.89705	2.02589	1.80051	1.7394	1.81442	1.58503	1.5268	1.50523	0.000937019	0.0176293	2.02386	1.53902	1.78478	0.125807	0.0412831	0.0399073
A_44_P303619	2.17404	1.94528	2.07491	1.75762	1.74006	1.6405	1.5318	1.47237	1.49052	0.000322876	0.0119857	2.06475	1.49823	1.71273	0.11472	0.0304578	0.0631614
A_44_P304082	1.54023	1.5073	1.50243	1.94286	1.4486	1.47111	3.41176	3.20402	2.84738	0.000211471	0.0104448	1.51666	3.15439	1.62086	0.0205627	0.285449	0.279093
A_44_P304190	7.29847	7.29613	7.56739	5.88433	5.62703	6.20301	6.41037	7.33412	7.61382	0.00954738	0.0426616	7.38733	7.11944	5.90479	0.155941	0.629792	0.288532
A_44_P304275	10.1986	10.1959	10.1955	10.0686	10.1365	10.0909	10.4026	10.4135	10.7078	0.00636573	0.0365431	10.1967	10.508	10.0987	0.00166004	0.173113	0.0345889
A_44_P304606	1.63785	1.60381	1.59037	1.4993	1.49304	1.49555	1.45111	1.44757	1.48878	0.000202563	0.0103386	1.61068	1.46249	1.49596	0.0244756	0.0228385	0.00315027
A_44_P304658	6.43357	6.4291	6.5163	6.88409	6.89527	6.97806	6.68723	6.97611	6.63406	0.00703918	0.0379208	6.45965	6.7658	6.91914	0.049103	0.184064	0.0513343
A_44_P304752	9.55076	9.2859	9.50828	9.55029	9.85331	9.68192	9.29451	9.16885	9.12229	0.00989749	0.043236	9.44831	9.19521	9.69517	0.14225	0.0890848	0.151944
A_44_P304792	1.58209	1.54282	1.53393	1.50868	1.46704	1.49076	1.40872	1.40814	1.46081	0.00287748	0.0275709	1.55295	1.42589	1.48883	0.0256255	0.030245	0.0208869
A_44_P304966	4.69587	4.88931	4.70755	4.98939	4.10085	4.78107	5.4846	5.6638	5.77898	0.00987044	0.0431977	4.76424	5.64246	4.62377	0.108467	0.148343	0.464684
A_44_P305092	5.03471	5.12718	5.14419	5.31694	5.2166	5.29573	4.83991	4.45296	4.50437	0.00171224	0.0219617	5.10203	4.59908	5.27642	0.0589165	0.21014	0.0528828
A_44_P305577	1.9538	1.79862	1.80171	1.73279	1.6095	2.12974	4.02149	3.64897	3.03537	0.000973982	0.0179002	1.85137	3.56861	1.82401	0.0887132	0.497951	0.27185
A_44_P306162	2.27707	1.98925	2.07234	1.86639	1.76035	1.94528	1.73236	1.56382	1.53896	0.00592566	0.0354136	2.11289	1.61172	1.85734	0.148133	0.105219	0.0927992
A_44_P306185	13.8514	13.7583	13.918	14.4578	14.4113	14.473	14.3548	14.4427	14.3354	3.17277e-05	0.0053331	13.8426	14.3776	14.4474	0.0802198	0.057193	0.0321268
A_44_P306912	1.88256	1.7186	1.76098	1.70545	1.59779	1.67676	1.54276	1.53303	1.51701	0.00543434	0.0344946	1.78738	1.53093	1.66	0.085112	0.0130036	0.0557536
A_44_P306930	7.21904	8.40872	7.95055	4.67525	4.47651	4.75154	5.00251	5.43359	5.66977	0.000162435	0.00956133	7.85944	5.36862	4.63443	0.60005	0.338343	0.141984
A_44_P307181	3.26436	3.39407	3.57861	1.68308	2.27228	1.21895	1.97824	1.54353	2.2323	0.00288772	0.0275709	3.41234	1.91802	1.72477	0.157918	0.348311	0.527901
A_44_P307625	6.52733	6.31016	6.49569	6.73934	6.33865	6.57422	5.54073	5.52933	5.85952	0.00126126	0.0196215	6.44439	5.64319	6.55074	0.117321	0.187434	0.201375
A_44_P308096	2.09345	1.8438	1.96054	1.79849	1.71583	1.898	1.60467	1.55149	1.51226	0.00486557	0.0328482	1.96593	1.55614	1.80411	0.12491	0.0463788	0.0912174
A_44_P308308	5.59891	5.94997	5.92746	5.01255	5.21773	5.44398	5.22757	5.22616	5.11251	0.00677145	0.0374634	5.82545	5.18874	5.22476	0.196507	0.0660264	0.215798
A_44_P308416	10.9208	11.6672	11.6846	9.88006	10.5441	10.2468	8.98544	9.14941	9.44474	0.000651134	0.0146923	11.4242	9.1932	10.2236	0.436039	0.232763	0.332617
A_44_P308479	3.83964	3.81581	3.82111	3.6849	3.90833	4.08333	3.45755	3.29259	3.13322	0.00498939	0.0330417	3.82552	3.29445	3.89219	0.0125105	0.162174	0.199701
A_44_P308530	7.50726	7.56799	7.68047	7.67013	7.78843	7.44594	8.06555	8.0401	8.21341	0.00398094	0.0305811	7.58524	8.10635	7.63483	0.087881	0.0935816	0.173953
A_44_P308838	1.78353	1.63691	1.68676	1.63454	1.56291	1.61344	1.50965	1.50965	1.49577	0.00716171	0.0381278	1.7024	1.50502	1.60363	0.0745504	0.00801443	0.0368086
A_44_P308898	6.24266	7.25339	6.76986	7.88584	4.90928	5.93949	1.16808	1.16778	1.18888	0.00054552	0.0138792	6.7553	1.17491	6.24487	0.505525	0.0120935	1.51159
A_44_P309128	2.39617	3.19904	3.12129	2.94811	2.5581	2.57666	4.3085	4.14097	4.21319	0.00130095	0.0197934	2.9055	4.22089	2.69429	0.442805	0.0840298	0.220012
A_44_P309202	11.6145	11.6751	11.6103	12.3762	12.5188	12.0142	12.5602	12.434	12.3681	0.0017525	0.0221431	11.6333	12.4541	12.3031	0.0362874	0.0976149	0.260091
A_44_P309266	3.64323	4.12166	4.04241	1.26525	1.27471	1.268	1.25958	1.26276	1.57056	2.76082e-06	0.00194862	3.93577	1.3643	1.26932	0.256424	0.178632	0.00486472
A_44_P309403	14.0283	13.8068	13.7702	14.2362	14.395	14.3436	14.214	14.3318	14.2186	0.00298969	0.0278702	13.8684	14.2548	14.3249	0.139646	0.0667271	0.0810164
A_44_P309499	5.52956	5.41634	5.52005	5.80677	6.23166	5.48547	6.77545	6.46446	6.34645	0.00654503	0.036879	5.48865	6.52879	5.8413	0.0628025	0.221618	0.37429
A_44_P309573	9.58414	9.6488	9.48023	9.39308	9.43086	9.45224	9.73129	9.74614	9.62902	0.00535838	0.0343745	9.57106	9.70215	9.42539	0.0850423	0.063766	0.0299559
A_44_P310386	11.3364	11.3648	11.3446	11.5952	11.6154	11.4442	11.7216	11.7732	11.7433	0.00042569	0.0127622	11.3486	11.746	11.5516	0.0146352	0.0259306	0.093541
A_44_P310484	1.69031	1.62707	1.62166	1.56886	1.52522	1.53703	1.47526	1.46858	1.51311	0.00146236	0.0207168	1.64635	1.48565	1.5437	0.038173	0.0240149	0.0225737
A_44_P310826	5.15945	5.2328	5.39325	4.89608	4.9336	4.76	4.52574	3.9094	3.91003	0.00209252	0.0241544	5.26184	4.11506	4.86323	0.119577	0.355664	0.0913419
A_44_P310851	11.6793	12.1169	12.1269	11.1688	11.1198	11.4905	11.4963	11.3597	11.2479	0.00983045	0.0431271	11.9744	11.368	11.2597	0.255555	0.124428	0.20138
A_44_P311028	4.91056	5.06555	4.99867	4.74405	4.76358	5.15357	4.43956	4.45194	4.19157	0.00698603	0.0378252	4.99159	4.36102	4.88707	0.0777341	0.146881	0.231008
A_44_P311552	2.27259	1.98528	2.06838	1.86717	1.75953	1.95285	1.65342	1.56579	1.53881	0.00305993	0.028054	2.10875	1.58601	1.85985	0.147851	0.059917	0.0968679
A_44_P311767	1.81366	1.69324	1.70349	1.67158	1.56507	1.59714	1.51578	1.51181	1.52392	0.00494672	0.0330067	1.7368	1.51717	1.61126	0.0667626	0.00617386	0.0546401
A_44_P311771	5.41576	6.28063	6.0796	4.56062	3.97081	3.58137	2.9518	2.76139	1.82913	0.00060396	0.0143645	5.92533	2.51411	4.0376	0.452603	0.600796	0.49303
A_44_P312144	1.8927	1.73965	1.76463	2.05213	1.84177	1.86197	1.54561	1.62913	1.52498	0.00738803	0.0386607	1.79899	1.56657	1.91862	0.0821072	0.0551485	0.116059
A_44_P312166	4.03783	3.59867	3.2385	1.21802	1.19282	1.25301	1.83776	2.4888	2.15262	0.000187248	0.0100201	3.625	2.15973	1.22128	0.400316	0.325579	0.0302266
A_44_P312207	5.53294	5.46773	5.35329	5.65105	5.57879	5.9674	5.16348	4.88778	4.99496	0.0035271	0.0295936	5.45132	5.01541	5.73241	0.0909406	0.138983	0.206687
A_44_P312318	6.65955	6.71679	6.67796	6.95523	6.88243	6.95422	6.89442	6.75719	6.93877	0.00714685	0.038091	6.68477	6.86346	6.93063	0.0292217	0.0946641	0.0417414
A_44_P312484	7.5934	7.78525	7.71908	8.08708	7.95586	8.26619	8.08555	8.07555	8.06073	0.00605794	0.0358067	7.69925	8.07394	8.10304	0.0974506	0.0124848	0.155778
A_44_P312907	4.11951	3.48666	3.66108	2.56013	3.68938	3.18844	2.39519	2.0509	2.1422	0.00781401	0.039445	3.75575	2.1961	3.14598	0.326873	0.178358	0.565822
A_44_P313542	8.61637	8.76305	8.66311	9.73262	8.86816	9.39358	10.4242	9.72823	10.6425	0.00603215	0.035739	8.68084	10.265	9.33145	0.074933	0.47747	0.435566
A_44_P313767	5.02062	4.51488	4.50197	5.951	6.35049	5.90139	5.5862	5.62339	4.92719	0.00513706	0.0335885	4.67915	5.37893	6.06762	0.295786	0.39166	0.246221
A_44_P313825	8.41196	8.39322	8.47395	7.42808	7.88112	7.18626	8.29626	8.07706	7.92407	0.00744375	0.0387199	8.42638	8.09913	7.49849	0.0422486	0.187073	0.35274
A_44_P314260	3.54107	3.91088	3.0524	3.82677	3.97178	3.75581	5.26953	4.86999	4.56544	0.00476252	0.0325776	3.50145	4.90166	3.85145	0.43061	0.353112	0.110085
A_44_P314353	7.50946	7.24145	7.45941	8.05819	7.88388	7.86721	7.8386	7.55827	7.7965	0.00805223	0.0398134	7.40344	7.73113	7.93643	0.142501	0.151168	0.105779
A_44_P314771	1.80488	1.66765	2.32873	2.59128	1.62389	2.25931	3.79598	3.69768	3.69838	0.00144444	0.0206388	1.93375	3.73068	2.15816	0.348872	0.056551	0.491563
A_44_P315092	1.42891	1.40658	1.41435	1.4085	1.38167	1.36498	1.91679	1.76883	1.6818	0.000694746	0.0153069	1.41661	1.78914	1.38505	0.011336	0.118805	0.0219566
A_44_P315937	4.2823	4.48341	4.25813	4.31487	3.89414	4.6783	5.8587	5.86869	5.73864	0.000367538	0.0124518	4.34128	5.82201	4.29577	0.123678	0.0723706	0.392427
A_44_P315977	3.26949	3.20027	3.18639	2.64313	3.25413	3.33385	4.35127	3.99184	3.92893	0.00570786	0.0348864	3.21872	4.09068	3.07704	0.0445136	0.227855	0.377887
A_44_P316286	5.61691	5.49501	5.81032	5.68083	4.95089	5.64728	6.75607	6.72167	6.48014	0.00302974	0.0280122	5.64074	6.65263	5.42634	0.159	0.15036	0.412089
A_44_P316451	5.1162	5.42173	5.39567	5.4224	6.07671	5.01325	6.80615	6.58165	6.38366	0.0082366	0.040189	5.3112	6.59049	5.50412	0.169376	0.211383	0.536416
A_44_P316819	4.18234	4.37951	4.39497	5.91107	5.28447	5.22583	5.47816	5.41217	5.63001	0.00135459	0.0200773	4.31894	5.50678	5.47379	0.118547	0.111708	0.379828
A_44_P316822	7.46996	7.58272	7.7168	7.63035	7.58373	7.56799	7.34699	7.13967	7.2675	0.00689345	0.0376502	7.58983	7.25139	7.59403	0.123571	0.104595	0.0324313
A_44_P317639	1.6586	1.59278	1.59821	1.56339	1.51616	1.53904	1.46054	1.45845	1.50581	0.0032107	0.0286798	1.61653	1.47494	1.53953	0.036533	0.0267606	0.0236198
A_44_P318001	1.87046	1.73384	1.88772	1.64117	1.64983	1.54337	1.49636	1.43546	1.4378	0.00100306	0.0181889	1.83068	1.45654	1.61146	0.0843014	0.0345072	0.0591229
A_44_P318080	1.44489	1.41213	1.44301	1.40367	1.40295	1.4167	1.36913	1.35711	1.36516	0.00116038	0.0190044	1.43334	1.3638	1.40777	0.0183967	0.00612656	0.00773679
A_44_P318255	8.58273	8.52975	8.71998	9.25812	9.18414	9.27308	9.15452	9.03467	9.28172	0.000375552	0.0124518	8.61082	9.15697	9.23845	0.0981762	0.123545	0.047623
A_44_P318364	2.57479	1.91082	1.97858	1.87992	2.21532	1.93365	4.49565	4.39153	4.1873	4.42655e-05	0.00586029	2.15473	4.35816	2.00963	0.365353	0.156862	0.180146
A_44_P318435	9.91941	9.80343	10.004	10.4974	10.3951	10.4715	10.0639	10.0379	10.3667	0.00504532	0.0332648	9.90893	10.1562	10.4547	0.10067	0.182783	0.0532305
A_44_P318616	15.624	15.5376	15.5983	15.7806	15.8235	15.8929	15.7331	15.795	15.7449	0.00157163	0.021239	15.5866	15.7576	15.8323	0.0443996	0.0328646	0.0566673
A_44_P318661	6.39399	6.41667	6.53728	6.79089	6.92231	6.77775	7.4238	7.23586	7.18626	0.000132807	0.00899003	6.44931	7.28197	6.83032	0.0770226	0.125302	0.0799393
A_44_P318778	6.01685	6.90254	6.67494	5.05299	4.77601	5.2243	4.79684	4.98799	5.76008	0.00819791	0.0401518	6.53144	5.18164	5.01776	0.459953	0.509979	0.226212
A_44_P318854	1.9939	1.78125	1.85871	1.75884	1.65868	1.84138	1.58713	1.55546	1.53357	0.0093058	0.0421735	1.87795	1.55872	1.75297	0.107624	0.0269287	0.0914884
A_44_P318999	6.97806	7.17707	6.8332	8.07268	8.13518	7.52858	7.48433	7.58631	7.47688	0.00645549	0.0367187	6.99611	7.51584	7.91215	0.172647	0.0611402	0.333648
A_44_P319971	5.44356	5.5931	5.73562	5.4463	5.24891	5.25064	4.92021	4.80186	5.0624	0.00238011	0.0255793	5.59076	4.92816	5.31528	0.146041	0.130448	0.113463
A_44_P320312	6.86265	6.82235	6.83456	7.54717	7.43644	7.46678	7.67694	7.30412	7.32156	0.00136007	0.0200773	6.83985	7.43421	7.48346	0.0206628	0.210393	0.0572195
A_44_P320818	12.5016	12.3441	12.3692	12.264	11.6442	11.9343	11.5922	11.0506	11.5758	0.00914361	0.0418286	12.405	11.4062	11.9475	0.0846174	0.308103	0.310116
A_44_P321021	1.85485	1.68279	1.82539	1.65909	1.63383	2.14099	3.64524	2.89995	2.99072	0.00165965	0.0217772	1.78767	3.17864	1.8113	0.092022	0.406628	0.285798
A_44_P321075	5.94676	5.92485	5.69878	6.31118	6.21278	6.22658	6.42033	6.62976	6.26942	0.00493265	0.0330067	5.8568	6.43984	6.25018	0.137284	0.180958	0.0532739
A_44_P321157	5.20961	5.23606	4.8858	5.15706	5.28742	5.21343	4.57498	4.61109	4.66447	0.00197221	0.023399	5.11049	4.61685	5.21931	0.195039	0.0450232	0.0653761
A_44_P321212	1.37679	1.3631	1.36669	1.35701	1.34052	1.32832	1.93126	2.13848	1.67139	0.00336406	0.0291578	1.36886	1.91371	1.34195	0.00710179	0.23404	0.0143955
A_44_P321220	5.63425	5.72562	5.57308	5.50808	5.64016	5.43257	5.23117	5.31977	5.05211	0.00616085	0.0360729	5.64432	5.20102	5.52694	0.0767638	0.136351	0.105073
A_44_P321359	6.30437	6.0479	5.96628	7.00256	6.74506	6.45275	6.93196	7.02958	6.87455	0.004497	0.0317573	6.10618	6.94536	6.73346	0.176419	0.0783838	0.275087
A_44_P321419	1.88611	1.78425	1.93596	1.61732	1.65072	1.46156	1.45884	1.37773	1.42297	0.00108289	0.0188373	1.86877	1.41985	1.57653	0.0773226	0.0406436	0.100961
A_44_P321468	1.98246	1.81716	1.82134	1.74695	1.61892	1.67767	1.57271	1.54139	1.53984	0.00302116	0.0279836	1.87365	1.55132	1.68118	0.0942533	0.0185459	0.0640838
A_44_P321506	7.13135	7.00823	7.15958	7.61675	7.26604	7.6059	6.55453	6.66451	6.99503	0.00646998	0.0367328	7.09972	6.73802	7.49623	0.0804826	0.229266	0.199423
A_44_P321510	6.20301	6.16004	6.37874	6.73444	6.5368	6.89379	5.72204	5.72726	6.22548	0.00784582	0.03945	6.24726	5.89159	6.72167	0.115872	0.289165	0.178839
A_44_P322071	2.02014	1.8743	1.85716	1.87292	1.54978	1.60641	1.48165	1.47784	1.44744	0.00821019	0.0401518	1.9172	1.46897	1.67637	0.0895622	0.0187509	0.17256
A_44_P322118	11.9675	11.8147	11.8264	12.1502	12.135	12.1486	11.9945	11.9343	11.9087	0.00232931	0.025345	11.8695	11.9458	12.1446	0.0850694	0.0440401	0.00835059
A_44_P322446	3.99872	2.58438	3.46052	5.58637	4.81386	5.27329	4.96273	5.05744	5.77581	0.0071346	0.0380838	3.34787	5.26533	5.22451	0.713869	0.444622	0.388557
A_44_P322651	3.06559	2.74624	2.9683	3.00973	2.82665	2.71871	2.1946	2.3733	2.28093	0.00228804	0.0251154	2.92671	2.28294	2.8517	0.163686	0.0893685	0.147119
A_44_P323735	1.87522	2.04883	1.91951	1.64524	1.5734	1.66623	1.53793	1.54529	1.56298	0.000402589	0.0125999	1.94785	1.54873	1.62829	0.0902083	0.0128725	0.0486818
A_44_P323882	6.44472	6.13239	6.14572	6.23495	6.34464	6.33739	5.96783	5.76059	5.66948	0.00846964	0.0405946	6.24094	5.7993	6.30566	0.176603	0.152893	0.0613472
A_44_P324340	12.6241	12.6453	12.4297	12.9539	12.8172	12.8	12.8435	12.9355	12.8717	0.00818924	0.0401518	12.5664	12.8836	12.857	0.11881	0.0471225	0.0843527
A_44_P324806	6.02435	5.84019	5.68137	7.05158	6.42066	6.72524	7.59616	7.21165	7.48867	0.000548009	0.013883	5.84863	7.43216	6.73249	0.171644	0.198382	0.315525
A_44_P324968	9.47546	9.76932	9.65049	9.49501	9.13231	9.01171	8.66263	8.71314	8.22026	0.00314485	0.0285047	9.63176	8.53201	9.21301	0.147824	0.271163	0.251554
A_44_P325051	1.91768	1.7394	1.79129	1.72296	1.61356	1.7258	1.55847	1.54057	1.51747	0.0061135	0.0359787	1.81612	1.53884	1.68744	0.0916946	0.0205536	0.0639959
A_44_P325268	8.79144	8.69875	8.59551	9.05879	9.20365	9.08193	8.98238	9.07821	8.88824	0.00348722	0.0295407	8.69523	8.98294	9.11479	0.0980109	0.0949862	0.07782
A_44_P325320	2.04758	1.89007	1.87634	1.87772	1.56183	1.62309	1.48617	1.48137	1.45035	0.00656526	0.0369373	1.938	1.47263	1.68755	0.0951454	0.0194467	0.167519
A_44_P326366	6.01401	5.92522	6.05384	5.4542	5.2899	5.81195	5.01826	5.0757	5.31408	0.00350849	0.0295535	5.99769	5.13602	5.51868	0.0658467	0.15686	0.266932
A_44_P327277	1.69636	1.63478	1.62647	1.56212	1.52537	1.53045	1.47784	1.46894	1.51407	0.00104376	0.0185365	1.65253	1.48695	1.53932	0.0381823	0.0239057	0.0199132
A_44_P328136	6.65835	8.35643	8.05785	4.49724	4.27176	5.4405	5.53134	5.36145	5.54947	0.00315223	0.0285047	7.69088	5.48075	4.7365	0.906573	0.103719	0.620019
A_44_P328421	4.91266	4.70112	5.02831	4.89642	4.97414	4.70634	4.1873	4.38213	4.05174	0.00300034	0.027879	4.8807	4.20706	4.85897	0.165923	0.166079	0.137772
A_44_P328474	2.09758	1.84595	1.94173	1.80709	1.7075	1.9309	1.61924	1.56708	1.5208	0.00903624	0.0416911	1.96175	1.56904	1.81516	0.127006	0.0492473	0.111917
A_44_P328520	4.90787	5.18794	4.51148	4.03352	3.70488	3.9447	3.42741	3.2484	3.43206	0.000553128	0.013883	4.8691	3.36929	3.89437	0.33989	0.104717	0.170002
A_44_P328637	2.09482	1.87362	1.89453	1.79957	1.66546	1.78293	1.61207	1.56339	1.5436	0.00444556	0.0316092	1.95432	1.57302	1.74932	0.122121	0.035238	0.0730994
A_44_P328664	7.99201	7.9174	7.8543	8.56337	8.44124	8.50457	7.99527	8.06903	8.30585	0.00161747	0.0214706	7.92124	8.12338	8.50306	0.0689374	0.16227	0.0610797
A_44_P328872	7.93989	7.86475	7.71999	8.25827	8.40477	8.16296	8.19498	8.15803	8.02591	0.00737851	0.0386607	7.84154	8.12631	8.27534	0.111772	0.0888895	0.121806
A_44_P328936	2.30392	2.18317	1.47003	3.16005	3.74019	3.07331	3.44744	3.81501	3.86842	0.00251927	0.0263124	1.98571	3.71029	3.32452	0.450651	0.229195	0.362589
A_44_P329475	6.15869	6.15596	6.1884	6.58381	6.51484	6.7574	6.51379	6.38366	6.19715	0.00953809	0.0426576	6.16768	6.36487	6.61868	0.0179942	0.159157	0.124983
A_44_P329745	1.45687	1.42668	1.4524	1.41917	1.40783	1.40327	1.37268	1.36191	1.38845	0.00169063	0.021938	1.44531	1.37435	1.41009	0.0162963	0.0133509	0.0081886
A_44_P330197	5.13886	3.53164	4.15188	1.9709	1.65882	2.6344	4.06338	4.01906	3.62998	0.00683664	0.0376117	4.27413	3.90414	2.08804	0.81055	0.238459	0.498228
A_44_P330342	15.2977	15.1795	14.985	15.6786	15.6109	15.5809	15.915	15.8423	16.2953	0.00239702	0.0256505	15.1541	16.0175	15.6235	0.157913	0.243275	0.0500158
A_44_P330643	6.63772	6.5163	6.67378	7.24496	7.10855	7.32032	7.24086	7.29579	7.73901	0.00313047	0.0284174	6.60927	7.42522	7.22461	0.0825075	0.273135	0.107338
A_44_P330783	5.06406	5.52452	5.29526	3.50365	3.81977	3.78776	4.61406	5.13828	5.84096	0.0042738	0.0313412	5.29461	5.19777	3.70373	0.230227	0.615608	0.174009
A_44_P330943	8.63168	9.13893	9.09091	7.94479	8.19668	8.16459	8.30075	8.09639	8.38934	0.00433538	0.0314203	8.95384	8.26216	8.10202	0.280028	0.150239	0.137105
A_44_P330971	10.386	10.4641	10.773	10.9484	10.9927	10.7893	11.6893	11.3899	11.7307	0.000766658	0.0161311	10.541	11.6033	10.9101	0.204658	0.185977	0.106933
A_44_P331033	5.37898	5.41948	5.44754	5.21184	5.39472	5.13947	5.03217	4.99476	4.80455	0.00432807	0.0314203	5.41533	4.94383	5.24868	0.0344701	0.122059	0.131553
A_44_P331065	1.71021	1.54816	1.61486	1.49452	2.1408	2.00884	3.39068	3.06947	2.97384	0.000497209	0.0135271	1.62441	3.14466	1.88139	0.0814483	0.21836	0.341471
A_44_P331142	6.57713	6.70497	6.69448	7.43761	7.48107	7.23918	7.20835	6.84028	7.08777	0.00196751	0.0233974	6.65886	7.04546	7.38595	0.0709746	0.187644	0.128954
A_44_P331210	3.5741	3.7899	4.03872	3.95559	4.23265	3.55321	5.4405	4.67294	5.2243	0.00501746	0.0331689	3.80091	5.11258	3.91382	0.232504	0.395787	0.34164
A_44_P331214	6.42066	6.91373	6.843	5.65457	5.74926	5.82121	5.6927	5.92821	5.48222	0.00141796	0.0204553	6.7258	5.70104	5.74168	0.266615	0.22311	0.0835772
A_44_P331706	5.37875	5.52005	5.61837	5.8991	5.5098	5.75765	6.13669	6.09814	6.30014	0.00371961	0.0302911	5.50572	6.17833	5.72218	0.120454	0.107242	0.19706
A_44_P331901	1.4742	1.43647	1.46973	1.43154	1.42639	1.44419	1.38928	1.37529	1.387	0.00138158	0.0201644	1.46014	1.38385	1.43404	0.0206131	0.0075077	0.00915977
A_44_P332543	10.0308	10.137	10.0542	10.4575	10.4661	10.427	10.3941	10.3321	10.6327	0.00471897	0.0324727	10.074	10.453	10.4502	0.0558225	0.158728	0.0205155
A_44_P332563	1.89339	1.76077	1.75904	1.70251	1.58906	1.62295	1.54063	1.52415	1.53456	0.0029523	0.0277926	1.8044	1.53311	1.63817	0.0770729	0.00833545	0.0582391
A_44_P332744	4.22717	7.94705	7.74937	1.34047	1.35191	1.38742	1.74515	1.63821	1.29176	0.00284344	0.0275429	6.6412	1.55837	1.35993	2.09294	0.237003	0.0244819
A_44_P332834	2.31585	4.0808	3.68459	1.35779	1.40189	1.58269	1.42154	1.3646	1.27185	0.00639613	0.0365493	3.36041	1.35266	1.44746	0.926057	0.0755544	0.119174
A_44_P333146	1.81834	1.64433	1.73912	1.93365	1.59189	1.68624	2.7963	2.49773	2.87973	0.000418548	0.0127232	1.73393	2.72459	1.73726	0.0871212	0.200842	0.176503
A_44_P333209	1.70128	1.63964	1.62866	1.56486	1.52656	1.53087	1.47947	1.4706	1.51521	0.00107101	0.0187609	1.65653	1.48843	1.54076	0.0391455	0.0236179	0.0209775
A_44_P333445	1.93571	1.76543	1.79628	1.73694	1.61344	1.70349	1.56307	1.54243	1.5285	0.0048041	0.0327125	1.83247	1.54467	1.68462	0.0907252	0.0173942	0.0638741
A_44_P333495	12.4678	12.2166	12.2628	12.6729	12.5371	12.6652	12.2665	12.2054	12.3345	0.00783362	0.039445	12.3158	12.2688	12.6251	0.133673	0.0646055	0.0762624
A_44_P333509	1.62166	1.58658	1.56964	1.49304	1.47582	1.48332	1.43315	1.43269	1.46572	0.000217547	0.0104448	1.59263	1.44385	1.48406	0.0265299	0.0189405	0.00862955
A_44_P334805	1.84702	1.7037	1.73224	1.69078	1.58151	1.63306	1.52893	1.52303	1.51942	0.00507404	0.0333674	1.76099	1.52379	1.63512	0.0758623	0.00479853	0.0546651
A_44_P334830	1.83858	1.70619	2.28065	3.03037	2.29139	3.27666	3.90354	4.29171	3.44841	0.00397887	0.0305811	1.94181	3.88122	2.86614	0.30082	0.422096	0.512755
A_44_P335002	2.23707	1.9549	2.05885	1.84503	1.75747	1.93596	1.63038	1.55533	1.52727	0.00253546	0.0263514	2.08361	1.57099	1.84615	0.142708	0.0533146	0.0892464
A_44_P335247	7.96227	8.08394	7.93711	8.77513	8.52229	8.82804	8.6142	8.42834	8.70413	0.00125345	0.0195942	7.99444	8.58222	8.70849	0.0785254	0.140646	0.163404
A_44_P335350	1.8872	1.69804	1.7954	1.69218	1.62078	1.75414	1.54802	1.54374	1.49384	0.00941578	0.0424352	1.79355	1.52853	1.68903	0.0945975	0.0301239	0.0667389
A_44_P335468	2.81658	3.25081	2.55627	3.28354	2.78395	2.83164	3.83603	4.45958	3.82027	0.00913407	0.0418286	2.87456	4.03863	2.96638	0.350882	0.364644	0.275705
A_44_P335479	10.0936	10.0652	10.087	10.5531	10.365	10.4962	9.98732	9.8221	10.188	0.00625303	0.0362438	10.082	9.99912	10.4714	0.0148703	0.183212	0.0964684
A_44_P335603	8.40727	8.28038	8.4112	8.90451	8.90451	8.88115	8.91196	8.82772	8.56909	0.0027795	0.0273741	8.36628	8.76959	8.89672	0.0744164	0.178674	0.0134875
A_44_P335617	8.7014	8.72202	8.69437	9.28467	9.15804	9.18182	8.90911	8.90481	9.20339	0.00343303	0.0293811	8.70593	9.00577	9.20818	0.0143704	0.17116	0.0673019
A_44_P335716	3.18308	3.39317	3.16591	1.57411	1.48264	1.99976	1.81822	1.6781	1.61856	6.8287e-05	0.00709039	3.24739	1.70496	1.68551	0.126545	0.102502	0.275973
A_44_P336518	5.01154	4.8849	5.18794	5.35013	5.5859	5.58269	5.88217	5.43339	5.76269	0.0096744	0.0428953	5.02813	5.69275	5.50624	0.152195	0.23242	0.135207
A_44_P336608	11.975	11.9939	12.0578	12.2315	12.4424	12.2222	12.5211	12.5868	12.3232	0.00562378	0.0346736	12.0089	12.477	12.2987	0.0433837	0.137207	0.12454
A_44_P336664	10.1981	10.0314	10.2639	10.8119	10.6831	10.7724	10.9574	11.0888	11.1139	6.53716e-05	0.00703567	10.1644	11.0534	10.7558	0.11984	0.0840526	0.065993
A_44_P336993	1.95606	1.795	1.80319	1.7378	1.61164	1.66844	1.56445	1.53875	1.5378	0.00341753	0.0293151	1.85142	1.547	1.67263	0.0907171	0.0151199	0.0631858
A_44_P337816	1.5401	1.49529	1.524	1.50286	1.47251	1.48226	1.4271	1.42181	1.44159	0.00185248	0.0227917	1.5198	1.43017	1.48588	0.0227003	0.0102443	0.0154909
A_44_P338021	1.24952	1.25578	1.57158	2.29709	1.81638	1.30918	3.08465	2.61781	2.88111	0.0038842	0.0305113	1.35896	2.86119	1.80755	0.184158	0.234057	0.494012
A_44_P338149	14.6601	14.5889	14.5509	14.9255	14.8744	14.9529	15.0925	15.1009	14.9692	0.000198388	0.0101989	14.6	15.0542	14.9176	0.0554315	0.0737072	0.03984
A_44_P338514	5.33164	5.01749	5.69008	5.11647	5.28367	5.34314	6.02355	5.99716	6.09053	0.00676003	0.037414	5.34641	6.03708	5.24776	0.336538	0.0481317	0.117524
A_44_P338632	1.52509	1.50193	1.47645	1.46006	1.40331	1.39577	1.36159	1.35455	1.40452	0.00488367	0.0328794	1.50116	1.37355	1.41971	0.0243293	0.0270506	0.0351466
A_44_P338778	1.65513	1.59198	1.59657	1.55808	1.51443	1.53711	1.45851	1.45722	1.50464	0.00276222	0.0273299	1.61456	1.47346	1.53654	0.0352115	0.0270115	0.0218321
A_44_P338999	10.297	10.5298	10.4808	10.2759	10.1193	10.1969	9.78745	9.8853	10.0809	0.00558907	0.0346536	10.4359	9.91787	10.1973	0.122726	0.149388	0.0783221
A_44_P339594	5.81253	5.26439	5.79923	5.75803	5.65369	6.02533	7.04638	6.68203	7.20457	0.00146395	0.0207197	5.62538	6.97766	5.81235	0.3127	0.267963	0.191681
A_44_P339625	2.19658	1.91814	1.97129	1.88649	1.66205	1.88166	1.57313	1.55086	1.47734	0.00593766	0.0354546	2.02867	1.53378	1.81007	0.14782	0.0501293	0.128211
A_44_P339708	3.19704	3.18607	3.12598	1.65016	1.86316	2.06682	2.94161	2.78652	2.17563	0.00264858	0.0268446	3.1697	2.63459	1.86005	0.0382533	0.404957	0.208348
A_44_P339798	7.29962	8.2	7.78493	5.46065	5.82701	5.63553	5.88014	5.42862	5.24159	0.000304478	0.01177	7.76151	5.51678	5.64106	0.450647	0.328277	0.183245
A_44_P340079	2.12539	1.87292	1.99805	1.80226	1.73183	1.86107	2.8248	2.77832	2.52859	0.000237282	0.0106109	1.99879	2.71057	1.79839	0.126236	0.159301	0.0647042
A_44_P340357	9.10717	8.99631	8.90996	9.376	9.24522	9.33833	9.56949	9.51169	9.39308	0.00129595	0.019783	9.00448	9.49142	9.31985	0.098857	0.0899351	0.0673213
A_44_P340375	9.90981	9.91977	9.96063	10.5261	10.3644	10.3097	10.2688	10.1446	10.4343	0.00418975	0.0311989	9.93007	10.2826	10.4001	0.0269272	0.145308	0.112496
A_44_P340582	1.61336	1.507	1.54481	1.99775	1.82616	1.85245	1.58953	1.38723	1.37425	0.0027427	0.0273107	1.55506	1.45034	1.89212	0.0539153	0.120722	0.092416
A_44_P340768	1.56933	1.53143	1.52484	1.50875	1.46411	1.48975	1.4018	1.41734	1.45987	0.00450258	0.0317573	1.54187	1.42634	1.48754	0.0240128	0.0300645	0.022403
A_44_P341093	5.6398	6.02954	5.9952	5.99286	5.34417	5.71309	4.70782	4.68472	4.83587	0.00192643	0.0233003	5.88818	4.74281	5.68337	0.215786	0.0814202	0.325367
A_44_P341910	5.16296	4.40097	4.86516	1.35494	1.31281	1.45822	1.62789	1.35845	1.65219	3.89538e-06	0.00229947	4.8097	1.54618	1.37532	0.38401	0.163027	0.0748182
A_44_P341952	1.50452	1.47308	1.49114	1.47572	1.44319	1.43755	1.39927	1.39182	1.43658	0.00858199	0.0407576	1.48958	1.40922	1.45215	0.0157785	0.0239851	0.0206007
A_44_P342657	6.20075	6.24559	6.30124	6.8573	6.68784	6.58593	6.50554	6.28487	6.35097	0.00472515	0.0325004	6.2492	6.38046	6.71036	0.0503404	0.113254	0.137079
A_44_P342671	6.83703	7.25581	7.17854	8.39359	8.731	8.01318	8.16484	8.04837	8.38396	0.00192663	0.0233003	7.09046	8.19906	8.37926	0.222848	0.170389	0.359126
A_44_P342920	2.95005	1.32418	1.32884	1.31621	1.3354	1.43823	3.19678	3.88091	3.83266	0.00729107	0.038515	1.86769	3.63678	1.36328	0.937356	0.381816	0.0656136
A_44_P342923	1.5317	1.4993	1.49326	1.48646	1.4379	1.45756	1.37589	1.36843	1.43959	0.00896132	0.0416217	1.50809	1.39463	1.46064	0.0206737	0.0391087	0.0244219
A_44_P343037	1.72966	1.79342	1.68053	2.08768	2.75294	2.74048	3.48892	3.72371	2.87025	0.00318657	0.0286137	1.73454	3.36096	2.52703	0.0566004	0.440885	0.380541
A_44_P343615	1.40378	1.38475	1.41431	1.3633	1.35073	1.36614	1.34719	1.36204	1.33785	0.00441669	0.031597	1.40094	1.34903	1.36006	0.0149827	0.0121966	0.00820005
A_44_P344077	12.2362	12.2139	12.0651	12.1153	12.0509	11.89	11.7924	11.7941	11.8016	0.00502691	0.0332167	12.1717	11.796	12.0187	0.0929964	0.00485585	0.116027
A_44_P344562	13.6092	13.4875	13.7168	14.2623	14.2055	14.1894	14.1375	14.1329	14.0405	0.000142094	0.00924231	13.6045	14.1037	14.219	0.114722	0.054706	0.0383018
A_44_P344612	3.01373	3.03077	2.65277	1.39537	1.33097	1.33229	1.29413	1.27726	1.57164	2.88089e-05	0.00517045	2.89909	1.38101	1.35288	0.213487	0.165306	0.0368074
A_44_P345013	5.90139	6.10718	6.15547	5.55651	5.2869	5.61423	5.86829	5.92776	6.00892	0.00457876	0.0320385	6.05468	5.93499	5.48588	0.134935	0.0705901	0.174721
A_44_P345081	7.30896	7.22191	7.39097	7.62999	7.4814	7.67566	6.97227	7.17103	7.07456	0.00161086	0.0214208	7.30728	7.07262	7.59568	0.0845452	0.0993954	0.101571
A_44_P345161	2.19592	1.80695	2.4983	1.47462	1.62247	1.4813	1.44013	1.46659	1.38208	0.0094048	0.0424166	2.16706	1.4296	1.52613	0.346576	0.043227	0.0835035
A_44_P345169	6.40317	6.41495	6.29369	6.82172	6.75355	6.84138	6.80511	6.95457	7.2312	0.00318708	0.0286137	6.3706	6.99696	6.80555	0.0668727	0.216183	0.046095
A_44_P345175	1.33672	1.33008	1.33961	2.89925	2.86427	2.4558	1.33873	2.24949	2.1803	0.00541648	0.0344371	1.33547	1.92284	2.73977	0.00488634	0.507034	0.246547
A_44_P345207	8.6809	8.45326	8.63902	9.01502	9.01566	8.91643	8.90996	8.76074	8.70063	0.00857385	0.0407319	8.59106	8.79045	8.98237	0.12116	0.107781	0.057103
A_44_P345371	9.24934	9.32036	9.11966	9.73344	9.89299	9.84107	9.53511	9.69038	9.60692	0.000481526	0.0135007	9.22978	9.6108	9.8225	0.10177	0.0777069	0.0813788
A_44_P346011	5.21107	5.71143	5.6619	3.34296	4.07836	3.91649	4.61785	5.38116	4.60263	0.003601	0.0297847	5.52814	4.86721	3.77927	0.275698	0.445156	0.386429
A_44_P346426	7.39364	7.34298	7.33638	7.90482	8.05708	7.9545	7.96899	7.80513	7.58485	0.0021521	0.0245018	7.35766	7.78632	7.97213	0.0313264	0.19276	0.0776448
A_44_P346572	9.86883	9.77614	9.7309	9.92795	10.0427	10.0252	10.0462	10.0374	9.99376	0.0043298	0.0314203	9.79196	10.0258	9.9986	0.0703113	0.02807	0.0618079
A_44_P346807	5.99774	6.03208	5.94215	7.289	6.78447	6.71464	7.1292	7.10115	7.05734	0.000660016	0.0148034	5.99066	7.0959	6.92937	0.0453859	0.0362151	0.313401
A_44_P346959	8.73557	9.03658	8.98485	7.83523	7.95747	8.29371	8.05278	8.1556	8.31048	0.00201961	0.0237526	8.919	8.17295	8.0288	0.160948	0.129727	0.237419
A_44_P347299	2.24446	1.95883	2.04883	1.86092	1.75414	1.97229	1.65321	1.57093	1.59511	0.00488142	0.0328794	2.08404	1.60642	1.86245	0.146037	0.0422887	0.109079
A_44_P347970	10.1196	10.4883	10.3718	8.64764	8.62702	8.98485	8.81058	9.6189	10.0779	0.0089825	0.0416336	10.3266	9.50247	8.75317	0.188479	0.641654	0.200908
A_44_P348111	10.101	10.2102	10.0163	10.4827	10.4827	10.5853	10.6566	10.5626	10.4939	0.000807346	0.0165513	10.1092	10.571	10.5169	0.0972158	0.0816761	0.0592604
A_44_P348435	5.8826	6.1704	6.05036	6.04515	6.07483	5.71753	7.1202	7.13342	6.9687	0.00016541	0.00956133	6.03445	7.07411	5.94584	0.144559	0.0915228	0.198275
A_44_P348614	7.94184	8.6958	8.50542	6.8941	7.15783	7.25161	7.34576	7.81712	7.62792	0.00437805	0.0314732	8.38102	7.59693	7.10118	0.392068	0.237204	0.185367
A_44_P348719	6.61392	6.8676	6.79409	5.91979	6.25874	6.36831	6.32704	6.18128	6.2179	0.00856188	0.040688	6.75853	6.24208	6.18228	0.130525	0.0758257	0.233832
A_44_P348781	14.811	15.4865	15.2448	16.0636	16.7359	15.963	16.2158	16.988	16.5759	0.00974363	0.0430111	15.1808	16.5933	16.2542	0.342269	0.386363	0.420236
A_44_P348825	4.18945	3.97333	4.18697	3.82909	3.7885	3.69721	3.63855	3.4043	3.4637	0.0012924	0.019783	4.11658	3.50218	3.7716	0.124064	0.121773	0.0675463
A_44_P348912	1.41653	1.39123	1.74057	1.38915	1.36506	1.3536	2.50466	2.08422	2.37369	0.000912219	0.0174735	1.51611	2.32085	1.36927	0.194796	0.215142	0.0181412
A_44_P348952	1.84362	1.66566	1.80199	1.65482	1.62414	1.68079	1.52537	1.50314	1.46185	0.00384937	0.0304691	1.77042	1.49679	1.65325	0.0930868	0.0322353	0.0283562
A_44_P349002	4.34216	4.22921	4.16293	3.71402	3.56222	3.56131	3.45451	2.69075	3.13431	0.00277076	0.0273495	4.24477	3.09319	3.61252	0.0906267	0.383538	0.0879073
A_44_P350189	2.05241	1.82577	1.88843	2.41775	2.30655	2.45929	4.88464	4.81702	4.66626	9.44566e-08	0.000229402	1.9222	4.78931	2.39453	0.117034	0.111799	0.0789758
A_44_P351605	1.32418	1.33201	2.1321	1.43569	1.30957	1.70728	2.772	2.89176	3.90033	0.00690416	0.0376502	1.5961	3.18803	1.48418	0.464212	0.61977	0.203244
A_44_P351898	6.66007	6.72793	6.57156	6.01081	5.65895	6.14871	5.81607	5.79951	6.19305	0.00678149	0.0374912	6.65319	5.93621	5.93949	0.0784149	0.222584	0.252546
A_44_P351947	5.94215	5.94259	5.92029	6.43743	6.11981	6.39085	6.1531	6.16597	6.17268	0.00952142	0.0426494	5.93501	6.16392	6.31603	0.0127508	0.00995084	0.171522
A_44_P352055	6.17434	6.00478	6.09673	6.47551	6.6456	6.46469	6.43548	6.37541	6.3986	0.00127094	0.0196215	6.09195	6.40316	6.5286	0.084884	0.030293	0.101471
A_44_P352104	6.70253	6.76482	6.82481	7.1377	7.18096	7.02156	7.02596	7.18981	6.97527	0.00558255	0.0346536	6.76405	7.06368	7.1134	0.0611425	0.112132	0.0824293
A_44_P352123	2.32235	2.92461	3.08263	1.31956	1.30935	1.29991	1.24192	1.62398	1.68822	0.00112404	0.0190044	2.77653	1.51804	1.3096	0.401188	0.241277	0.00982437
A_44_P352195	2.28093	1.95857	2.0486	1.88042	1.73023	1.98754	1.66819	1.57646	1.481	0.00878621	0.0411785	2.09603	1.57522	1.86606	0.166333	0.093602	0.129254
A_44_P352228	4.86025	4.9382	4.98545	4.66695	5.02141	4.75737	4.2426	4.10684	3.62103	0.00375369	0.0303318	4.92797	3.99016	4.81524	0.063229	0.326801	0.184183
A_44_P352783	1.87223	1.69292	1.83112	1.67121	1.63798	1.68347	1.5299	1.50364	1.46392	0.00242305	0.025855	1.79876	1.49915	1.66422	0.0939362	0.0332146	0.0235388
A_44_P353036	1.61218	1.53658	1.57271	1.55289	1.50501	1.51461	1.45645	1.45713	1.47016	0.00607496	0.0358224	1.57382	1.46125	1.52417	0.0378132	0.00772508	0.025335
A_44_P353672	3.71434	3.21043	2.87	3.91446	4.02634	3.88832	2.70971	2.64505	2.99664	0.00567112	0.0348339	3.26492	2.7838	3.94304	0.424797	0.187138	0.0733164
A_44_P354078	5.1148	6.16935	5.6398	2.96667	2.65908	2.14463	1.83058	2.74486	1.83225	0.000245893	0.0107875	5.64131	2.1359	2.59013	0.527277	0.527378	0.415333
A_44_P354255	6.9354	7.08464	7.09323	8.27411	8.58829	7.86542	7.78493	7.79434	8.18802	0.00281796	0.0274637	7.03776	7.92243	8.24261	0.088744	0.230055	0.362462
A_44_P354310	2.62986	1.90877	1.42427	2.9818	2.67803	3.27511	1.41848	1.32641	1.56828	0.00863815	0.0408179	1.98763	1.43773	2.97831	0.606649	0.122079	0.298554
A_44_P354415	3.98124	5.30108	5.10095	3.87078	4.63127	4.40121	5.95374	6.62053	6.72083	0.00605741	0.0358067	4.79442	6.4317	4.30109	0.711309	0.416955	0.390004
A_44_P354431	3.73515	3.88245	2.92762	3.26579	3.55707	3.6827	4.83681	4.72971	4.7593	0.00434795	0.0314203	3.51507	4.77527	3.50185	0.51405	0.0553088	0.213868
A_44_P354444	6.50668	6.35236	6.62098	6.82017	6.81678	6.91976	6.39788	6.16753	6.25099	0.00174518	0.0221254	6.49334	6.27214	6.85224	0.134803	0.116622	0.0585017
A_44_P354480	8.63312	8.63116	8.43468	9.20643	9.07127	8.74432	9.33761	9.32074	9.16306	0.00495517	0.0330067	8.56632	9.2738	9.00734	0.114008	0.0962757	0.237598
A_44_P354911	6.36572	6.32544	5.9921	7.22652	6.93507	7.402	7.76339	7.15181	7.24125	0.00353572	0.0296161	6.22775	7.38548	7.18786	0.20507	0.330319	0.235854
A_44_P355352	5.74857	5.75401	5.73242	5.84187	5.8061	5.79998	5.60463	5.46475	5.63466	0.00360562	0.0297847	5.745	5.56801	5.81598	0.0112299	0.0906817	0.0226257
A_44_P355582	5.92621	6.04952	5.93219	6.91555	6.95795	6.52211	6.95027	6.51406	6.99337	0.00398755	0.0305811	5.96931	6.81923	6.79854	0.0695324	0.265164	0.240328
A_44_P355620	10.6849	10.7426	10.3041	9.82547	9.44514	9.51347	8.86293	9.29647	9.86549	0.00998253	0.0434696	10.5772	9.34163	9.59469	0.238257	0.502806	0.202757
A_44_P355947	12.2266	12.0765	12.1125	12.7883	12.8524	12.7855	12.5356	12.6443	12.6937	5.38145e-05	0.0063894	12.1385	12.6245	12.8087	0.0783722	0.0808431	0.0378582
A_44_P355987	4.23315	4.0645	3.96588	4.86348	4.48833	4.44668	4.6965	4.91647	5.18931	0.0074028	0.0386607	4.08784	4.93409	4.5995	0.135157	0.246876	0.229566
A_44_P355997	1.6033	1.52019	1.58348	1.53251	1.51926	1.55559	1.46242	1.45691	1.44114	0.00592752	0.0354136	1.56899	1.45349	1.53579	0.0434051	0.0110442	0.0183867
A_44_P356047	11.14	11.1871	11.0827	11.5368	11.4843	11.3446	11.3454	11.304	11.4107	0.00434837	0.0314203	11.1366	11.3534	11.4552	0.0522488	0.0538068	0.0993567
A_44_P356143	11.3489	11.3249	11.3346	11.8283	11.8334	11.7037	11.5011	11.7197	11.401	0.00514365	0.0336066	11.3361	11.5406	11.7885	0.0120599	0.163011	0.0734721
A_44_P356222	4.70246	4.53514	4.57715	4.50239	4.47578	4.38372	4.02519	4.21795	3.75431	0.00588075	0.0353034	4.60492	3.99915	4.45396	0.0870444	0.232913	0.0622682
A_44_P356711	4.84485	5.50616	5.29669	4.73314	4.5784	4.91324	4.27494	4.28851	4.34067	0.00644774	0.0367027	5.2159	4.30137	4.74159	0.337977	0.0347034	0.167579
A_44_P356876	2.85438	3.37864	3.18181	4.30443	3.81644	4.1202	4.17887	4.0859	4.38883	0.00220221	0.0247149	3.13828	4.21787	4.08036	0.264826	0.155185	0.246425
A_44_P357377	1.93731	1.78737	1.78943	1.72472	1.60435	1.6482	1.55743	1.53321	1.53767	0.0030586	0.028054	1.83804	1.54277	1.65909	0.0859815	0.0128904	0.0609163
A_44_P357579	12.7285	12.7271	12.62	12.9149	12.9208	12.7099	13.0266	12.9702	13.055	0.00829437	0.0402996	12.6919	13.0173	12.8485	0.062231	0.0431492	0.120123
A_44_P357703	5.13145	4.89445	4.97275	5.67168	5.22642	5.4267	5.97086	6.57569	5.84958	0.00590373	0.0353697	4.99955	6.13204	5.4416	0.120754	0.388966	0.223002
A_44_P357734	3.94592	3.7377	3.77072	3.4607	3.40246	3.17988	3.17875	2.60345	2.78229	0.00325987	0.0287561	3.81812	2.85483	3.34768	0.111908	0.294429	0.148207
A_44_P357870	12.7469	12.6836	12.3309	12.0566	11.7757	12.1384	11.9985	11.8056	11.6001	0.0079905	0.0397287	12.5872	11.8014	11.9902	0.224127	0.199227	0.190238
A_44_P358082	2.71922	3.03365	3.08923	3.55149	3.70514	3.53995	2.92539	3.17582	3.18308	0.00459937	0.0321526	2.94737	3.09476	3.59886	0.199525	0.14673	0.0922194
A_44_P358743	2.71979	2.41034	3.65988	1.44588	1.43493	1.44717	1.39567	1.38448	1.40282	0.00381923	0.0303606	2.93	1.39432	1.44266	0.650754	0.00924489	0.00672313
A_44_P358782	1.7429	2.2015	1.66688	2.71814	1.55752	2.18534	3.61834	3.66723	3.07382	0.00783702	0.0394488	1.87043	3.45313	2.15366	0.28923	0.329399	0.580953
A_44_P359032	12.4595	12.604	12.3201	12.3657	12.2897	12.3986	12.0598	12.1467	12.0071	0.00673943	0.0373752	12.4612	12.0712	12.3513	0.141971	0.0705242	0.0558648
A_44_P359208	2.0118	1.80051	1.85606	1.77375	1.65329	1.82293	1.59178	1.56164	1.52616	0.00815483	0.0400692	1.88946	1.55986	1.74999	0.109534	0.0328477	0.0872785
A_44_P359467	2.25847	1.99096	2.03054	1.9095	1.67568	1.83987	1.54642	1.52119	1.47548	0.00204515	0.0239027	2.09332	1.51436	1.80835	0.144384	0.0359619	0.120054
A_44_P359980	4.17647	4.53537	4.2779	5.2869	5.32792	5.20809	4.74237	5.18629	5.27826	0.0027191	0.0272266	4.32991	5.06897	5.2743	0.185018	0.286565	0.0609004
A_44_P360685	14.3768	14.1669	14.0712	13.9925	13.6357	13.665	13.3124	12.7257	13.1331	0.00234122	0.0253718	14.205	13.0571	13.7644	0.156297	0.30062	0.198091
A_44_P360926	1.65799	1.60984	1.60315	1.53066	1.50839	1.52101	1.46151	1.45671	1.50158	0.000589476	0.0142351	1.62366	1.47326	1.52002	0.0299146	0.0246395	0.011164
A_44_P360946	13.113	12.9355	12.8385	13.4262	13.4288	13.3728	13.3069	13.4863	13.2501	0.00474909	0.0325271	12.9623	13.3478	13.4093	0.139204	0.123293	0.0316035
A_44_P360972	1.61466	1.57347	1.56246	1.50785	1.5265	1.49692	1.4291	1.42928	1.47003	0.00082303	0.0166836	1.58353	1.44281	1.51042	0.0275127	0.0235785	0.0149566
A_44_P361144	4.31184	4.50647	4.37822	4.85795	5.21456	4.79653	4.12301	4.20935	4.2376	0.00173464	0.0220478	4.39884	4.18999	4.95634	0.0989386	0.0596984	0.22572
A_44_P361276	1.36255	1.34391	1.34645	1.33723	1.3238	1.31561	3.02784	2.58617	4.50047	0.00747583	0.038752	1.35097	3.37149	1.32555	0.0101103	1.00235	0.0109127
A_44_P361286	10.7784	10.773	10.6995	10.8147	10.9021	10.7623	10.5013	10.5134	10.6019	0.00219525	0.0246924	10.7503	10.5389	10.8264	0.0440753	0.0548919	0.0706487
A_44_P361357	8.66816	8.76549	8.77173	9.12528	9.16017	9.16837	9.16156	8.82071	9.10822	0.00985486	0.0431836	8.73513	9.03017	9.15128	0.0580782	0.183341	0.0228816
A_44_P361809	6.75383	6.59507	6.98178	7.50086	7.1949	7.39558	7.72987	7.58842	7.41397	0.00301007	0.0279347	6.77689	7.57742	7.36378	0.194386	0.158236	0.155436
A_44_P362507	1.58303	1.51203	1.62913	1.52109	1.54321	1.52805	1.45531	1.41866	1.39426	0.00785005	0.03945	1.57473	1.42274	1.53078	0.0589878	0.0307314	0.0113106
A_44_P362954	13.4767	13.2461	13.354	13.0385	12.9238	12.926	12.9702	12.6164	12.8117	0.00448268	0.0317573	13.3589	12.7995	12.9628	0.115392	0.177218	0.0655779
A_44_P363672	4.69088	4.84464	4.8984	5.10908	4.74695	5.17918	5.69081	5.55324	5.39065	0.00486482	0.0328482	4.81131	5.5449	5.01174	0.107698	0.150257	0.231976
A_44_P363882	8.70504	8.66666	8.89024	8.18831	8.44676	8.38961	8.11713	8.31695	8.14926	0.00331662	0.0289648	8.75398	8.19445	8.34156	0.119557	0.107302	0.13576
A_44_P363923	1.4079	1.3792	1.37867	1.37383	1.34645	1.34052	2.5589	2.03253	1.82529	0.0074906	0.0387533	1.38859	2.13891	1.3536	0.0167256	0.378201	0.0177704
A_44_P364039	2.44508	1.32485	1.3311	1.91538	2.26728	1.30427	4.9008	4.67932	3.38236	0.00478083	0.0326283	1.70034	4.32083	1.82898	0.644966	0.820249	0.487286
A_44_P364069	1.77274	1.60837	1.73476	1.61385	1.59198	1.65063	1.50888	1.4915	1.45075	0.00763774	0.0391437	1.70529	1.48371	1.61882	0.0860589	0.029838	0.0296411
A_44_P364447	8.91992	9.76877	9.78637	8.03822	7.85594	7.70497	7.83557	7.92471	7.78937	0.00083839	0.0167903	9.49169	7.84988	7.86638	0.495239	0.068798	0.166871
A_44_P364792	3.79945	3.69153	3.25209	3.46264	3.34994	3.14781	2.38322	2.58317	2.31175	0.00116156	0.0190044	3.58102	2.42605	3.32013	0.289931	0.140683	0.159516
A_44_P364952	1.61486	1.56857	1.56737	1.52444	1.49056	1.51495	1.43331	1.43319	1.48351	0.00185304	0.0227917	1.5836	1.45	1.50998	0.027079	0.0290193	0.0174781
A_44_P365286	11.9877	11.539	10.9208	12.9823	13.523	13.4011	12.5902	13.0704	13.1359	0.00281487	0.0274637	11.4825	12.9322	13.3021	0.535694	0.297948	0.283619
A_44_P365303	1.33183	2.24861	1.34722	1.31027	1.31773	1.3356	3.66059	2.59547	2.89633	0.00635561	0.0365431	1.64255	3.05079	1.3212	0.524915	0.549104	0.0130147
A_44_P365436	9.02526	9.16601	9.41011	8.48616	8.53984	8.60032	8.57897	8.76747	8.80935	0.00268531	0.0270521	9.20046	8.7186	8.54211	0.194724	0.122721	0.0571147
A_44_P366056	5.21284	5.29362	5.2273	5.68026	5.71294	5.62316	5.58132	5.37106	5.49956	0.00097361	0.0179002	5.24459	5.48398	5.67212	0.0430729	0.105991	0.0454406
A_44_P366142	6.6723	7.30917	7.04772	8.23591	7.63562	7.50463	4.81702	5.18997	3.75951	0.000676455	0.0150368	7.00973	4.58883	7.79205	0.320132	0.742028	0.389929
A_44_P366274	1.59821	1.58049	1.54235	1.46898	1.4497	1.44038	1.41455	1.41471	1.43814	0.00020981	0.0104278	1.57368	1.42247	1.45302	0.0285414	0.0135763	0.0145842
A_44_P366919	1.65615	1.60467	1.60091	1.53286	1.50855	1.5234	1.46024	1.45618	1.50134	0.000778218	0.0163055	1.62058	1.47259	1.5216	0.0308655	0.0249849	0.0122536
A_44_P366960	1.99696	1.83519	1.98351	1.69004	1.69198	1.5637	1.50511	1.43804	1.45674	0.000500698	0.0135271	1.93855	1.46663	1.64857	0.0897678	0.0346104	0.0735077
A_44_P367243	9.08313	9.03893	9.01845	8.30795	8.73313	8.62829	8.37679	8.41084	8.3601	0.00195025	0.0233704	9.04684	8.38258	8.55646	0.0330561	0.0258572	0.221503
A_44_P367481	2.17842	1.86606	1.96079	1.81296	1.82577	1.90792	3.83941	2.87207	3.55123	0.00128503	0.0197575	2.00176	3.4209	1.84888	0.16016	0.496662	0.0515305
A_44_P367486	9.7903	9.8076	9.97551	8.93271	8.86071	9.0455	8.98105	9.24587	9.04597	0.000127861	0.0089439	9.8578	9.09096	8.94631	0.1023	0.138024	0.0931427
A_44_P367550	13.6246	13.6158	13.8925	13.194	13.0385	13.3301	13.3753	13.1881	13.2853	0.0068931	0.0376502	13.711	13.2829	13.1875	0.15727	0.0936602	0.145939
A_44_P367551	13.4095	13.3728	13.6554	12.9625	12.8422	12.9514	13.0447	12.918	13.0791	0.00153926	0.0210873	13.4792	13.0139	12.9187	0.153672	0.084821	0.0664844
A_44_P367556	11.8629	11.7833	12.2021	11.5215	11.3866	11.4768	11.5201	11.5649	11.4947	0.00906685	0.0416969	11.9494	11.5266	11.4617	0.222412	0.0355384	0.0686931
A_44_P367761	8.57452	9.09184	8.60177	11.1573	11.512	11.3422	11.304	11.4597	11.0558	1.32848e-05	0.00377598	8.75604	11.2732	11.3372	0.291127	0.203704	0.177364
A_44_P367767	13.0038	13.0983	13.1773	13.5895	13.6554	13.6554	13.6909	13.4394	13.3564	0.00289961	0.0276118	13.0931	13.4956	13.6334	0.0868345	0.174184	0.0380589
A_44_P368049	2.25737	2.64018	2.48983	2.10529	1.84223	1.77522	1.58378	1.57056	1.45181	0.00101378	0.0182855	2.46246	1.53538	1.90758	0.192865	0.0726793	0.174468
A_44_P368263	14.7045	14.683	14.792	15.1836	15.2448	15.0635	15.0959	15.1916	15.0635	0.000635885	0.014605	14.7265	15.117	15.164	0.0577326	0.0666211	0.0922169
A_44_P368326	1.38273	1.35063	2.22651	2.66193	2.03078	2.44114	3.58415	3.6811	2.81233	0.00893965	0.0416199	1.65329	3.35919	2.37795	0.496684	0.476073	0.320285
A_44_P368400	4.52117	4.5784	4.66988	5.01731	4.83501	5.04589	5.64135	5.54229	5.66148	2.07076e-05	0.0045505	4.58981	5.61504	4.96607	0.0750073	0.0638053	0.114397
A_44_P368723	8.00809	8.05635	7.96828	8.80309	8.8772	8.81905	8.53755	8.2636	8.7482	0.00126192	0.0196215	8.01091	8.51645	8.83311	0.0441002	0.242987	0.0390025
A_44_P368993	10.9281	11.0672	10.8972	10.6562	10.7487	10.5997	10.4489	10.6773	10.6105	0.00630777	0.0363894	10.9642	10.5789	10.6682	0.0905775	0.117428	0.0752026
A_44_P369399	7.21558	7.04962	7.02533	7.78037	7.72556	7.75614	7.87238	8.07924	8.47691	0.00140862	0.0203753	7.09684	8.14284	7.75402	0.103541	0.307242	0.0274645
A_44_P369695	2.23074	1.94903	2.05241	1.8438	1.75544	1.93851	1.63113	1.55696	1.5268	0.00280488	0.0274637	2.07739	1.57163	1.84592	0.142505	0.0536905	0.0915554
A_44_P369701	8.08882	7.86559	7.99463	8.68781	8.62829	8.64871	8.53875	8.41944	8.74653	0.00079288	0.0165166	7.98301	8.56824	8.65494	0.11207	0.165531	0.030242
A_44_P369898	1.50149	1.45904	1.49384	1.51262	1.45051	1.46949	1.40546	1.39627	1.406	0.00801211	0.0397418	1.48479	1.40258	1.47754	0.0226255	0.0054693	0.031825
A_44_P369956	2.04189	1.818	1.88412	1.789	1.67287	1.86982	1.60487	1.567	1.52515	0.00923818	0.0420326	1.91467	1.56567	1.77723	0.115026	0.0398779	0.0990008
A_44_P370190	5.11227	6.03912	5.32395	2.00602	1.66429	1.70251	3.0051	2.20296	2.75231	5.30486e-05	0.00634885	5.49178	2.65346	1.79094	0.485687	0.410109	0.18724
A_44_P370267	10.7985	10.1641	10.7194	9.87037	9.66339	9.64034	9.74614	9.71107	9.90234	0.00613848	0.036001	10.5607	9.78651	9.7247	0.345697	0.101829	0.12668
A_44_P370335	9.34206	9.33761	9.30462	9.60466	9.73559	9.59612	9.71744	9.46523	9.62458	0.00850269	0.0406026	9.3281	9.60242	9.64546	0.0204569	0.127559	0.0781735
A_44_P370355	10.1891	10.609	10.6206	11.3338	11.3384	11.1324	10.7899	11.1382	10.704	0.00943763	0.0424878	10.4729	10.8774	11.2682	0.245829	0.229896	0.117642
A_44_P370411	5.17217	5.15993	5.15196	5.17487	5.58797	5.41659	4.87029	4.79247	4.79119	0.00355159	0.029666	5.16135	4.81798	5.39314	0.0101802	0.0453025	0.207543
A_44_P370817	1.31404	1.27703	1.29724	2.92809	1.84105	2.18232	2.70057	3.36844	3.02695	0.00377083	0.0303318	1.29611	3.03199	2.31715	0.0185332	0.33396	0.555924
A_44_P371172	1.38386	1.33416	1.34905	1.38937	1.38623	1.34003	2.15103	1.7875	1.70942	0.00531523	0.0342115	1.35569	1.88265	1.37188	0.0255028	0.23568	0.0276216
A_44_P372101	1.33782	1.32739	1.34846	1.66448	1.56324	1.40924	1.7416	1.89048	1.7394	0.00248607	0.0261544	1.33789	1.79049	1.54565	0.010538	0.0865979	0.128522
A_44_P372254	11.8567	12.4914	12.6704	8.49713	8.58595	8.76864	9.6365	12.3372	11.1482	0.00406891	0.0307429	12.3395	11.0407	8.61724	0.42757	1.35358	0.138436
A_44_P372261	10.334	11.0394	11.3684	6.91646	7.09872	7.25136	8.15084	10.8199	9.65831	0.00386974	0.0305012	10.914	9.543	7.08885	0.528497	1.33824	0.167669
A_44_P372277	13.3813	13.1817	13.1376	14.1241	14.3797	14.0283	13.4082	13.3524	13.2401	0.000290341	0.011602	13.2335	13.3336	14.1774	0.129841	0.085597	0.181658
A_44_P372810	3.76006	4.50466	4.51572	1.78373	2.28675	2.52921	2.37513	2.4728	1.96869	0.000719637	0.0155693	4.26014	2.2722	2.1999	0.433122	0.267352	0.380255
A_44_P372853	6.32128	5.85928	6.16047	5.27945	5.21036	5.09073	5.6388	5.53834	5.59583	0.000843158	0.0168558	6.11367	5.59099	5.19351	0.234526	0.0504043	0.0954824
A_44_P372874	5.58418	5.67568	5.60908	5.74633	5.71193	5.41217	4.58124	5.05777	5.11092	0.00743885	0.0387079	5.62298	4.91665	5.62348	0.0473083	0.29168	0.183807
A_44_P372998	1.69126	1.60812	1.61584	1.60641	1.52978	1.54816	1.47477	1.47412	1.51196	0.00746457	0.0387474	1.63841	1.48695	1.56145	0.0459326	0.0216603	0.040008
A_44_P373076	4.97393	4.88212	5.10228	5.41742	5.4267	5.58941	5.35532	5.20315	5.06537	0.00683803	0.0376117	4.98611	5.20795	5.47784	0.110584	0.145035	0.0967304
A_44_P373103	6.05081	5.83167	5.92821	6.4077	6.25752	6.32783	6.72616	7.15634	6.843	0.000630376	0.0145937	5.93689	6.9085	6.33102	0.10983	0.222443	0.0751388
A_44_P373230	1.65645	1.61361	1.60461	1.52181	1.50581	1.51102	1.46248	1.45557	1.50113	0.000368887	0.0124518	1.62489	1.47306	1.51288	0.0276962	0.0245514	0.00816082
A_44_P373660	5.38472	5.56172	6.13038	3.46527	3.19704	3.37796	3.84185	4.31184	4.46921	0.000233293	0.010557	5.69227	4.20763	3.34675	0.3896	0.326407	0.136809
A_44_P374638	16.7063	16.8939	16.8773	15.901	15.9743	15.7723	15.3315	15.4997	15.3836	5.771e-06	0.00281903	16.8259	15.4049	15.8826	0.103849	0.0860643	0.102257
A_44_P374851	2.15355	1.88634	1.99718	1.82089	1.73422	1.92993	1.62087	1.55808	1.51926	0.00466315	0.0323236	2.01236	1.56607	1.82835	0.134249	0.0512741	0.09807
A_44_P374902	5.26486	5.70312	5.46182	5.48409	5.26506	5.68888	6.00634	6.27797	6.27199	0.00682607	0.0376117	5.4766	6.18543	5.47934	0.219505	0.155131	0.21195
A_44_P375198	1.66061	1.58839	1.5983	1.58165	1.52085	1.54264	1.46277	1.46164	1.5085	0.00608152	0.035847	1.61577	1.47763	1.54838	0.0391466	0.0267336	0.0308033
A_44_P375224	1.96537	1.79187	1.81399	1.75069	1.62001	1.7088	1.57213	1.54591	1.53461	0.00435045	0.0314203	1.85707	1.55088	1.69317	0.0944375	0.019243	0.0667239
A_44_P375428	4.79383	5.19778	5.04589	4.99758	5.16409	4.53426	5.70132	5.76208	5.73706	0.00743065	0.0387042	5.0125	5.73348	4.89864	0.204036	0.0305395	0.326362
A_44_P375453	4.76463	3.51463	3.91276	4.53774	4.28565	4.33493	5.73489	5.6872	5.56562	0.00474929	0.0325271	4.06401	5.66257	4.38611	0.63858	0.0872831	0.133607
A_44_P375553	9.87275	10.0395	10.1125	10.2831	10.2457	10.4155	10.679	10.5558	10.5483	0.000981357	0.0179038	10.0082	10.5944	10.3147	0.122893	0.0734077	0.0892028
A_44_P375593	4.71753	4.92156	4.89017	5.64881	5.31218	5.49501	5.34951	5.01569	5.33574	0.00742389	0.0386945	4.84308	5.23365	5.48533	0.109859	0.188879	0.168525
A_44_P375623	1.6165	1.52772	1.58456	1.54098	1.51773	1.54764	1.46419	1.46174	1.45015	0.0057021	0.0348747	1.57626	1.4587	1.53545	0.0449677	0.00750253	0.0157031
A_44_P375790	2.15791	1.89339	1.95883	1.83512	1.70995	1.9322	1.64446	1.58509	1.53875	0.00914235	0.0418286	2.00338	1.58943	1.82576	0.137773	0.0529883	0.111421
A_44_P375995	9.36988	9.41894	9.44414	9.5984	9.46563	9.49501	9.21582	9.15131	8.91544	0.00544325	0.0344946	9.41099	9.09419	9.51968	0.0377649	0.15813	0.0697401
A_44_P376411	12.0545	11.6344	12.0088	12.9773	13.0805	12.8753	13.1881	13.1167	13.3081	0.000108269	0.00826382	11.8992	13.2043	12.9777	0.230502	0.0967366	0.102579
A_44_P376683	8.56134	8.45727	8.47354	8.79879	8.71936	8.65928	8.7575	8.73856	8.66776	0.00467113	0.0323236	8.49739	8.72127	8.72581	0.0559843	0.0473003	0.0699807
A_44_P376994	5.48323	5.34447	5.33386	5.07864	4.58803	4.80818	4.75131	4.41871	4.30167	0.00449574	0.0317573	5.38719	4.49056	4.82495	0.0833469	0.233276	0.245734
A_44_P377032	1.68624	1.62034	1.61764	1.57474	1.52527	1.54205	1.4735	1.46803	1.5125	0.00207665	0.0240641	1.64141	1.48468	1.54735	0.0388473	0.024253	0.0251552
A_44_P377245	8.54353	8.40928	8.37591	8.91103	8.90697	8.91314	8.8702	8.78253	8.71693	0.000379647	0.0124518	8.4429	8.78989	8.91038	0.0887244	0.0768994	0.00313705
A_44_P377418	2.91971	2.8242	3.14241	2.88111	3.66521	3.20641	2.34664	1.88427	1.90702	0.00525104	0.0340058	2.9621	2.04598	3.25091	0.163286	0.260633	0.393939
A_44_P377635	7.19996	7.3467	7.25865	7.64272	7.76475	7.51292	7.87175	7.78867	7.58657	0.00618626	0.0361154	7.26844	7.749	7.64013	0.0738542	0.146675	0.125935
A_44_P377810	2.25302	1.96664	2.05272	1.8646	1.75537	1.9709	1.65533	1.57109	1.53703	0.00428601	0.0313846	2.0908	1.58782	1.86362	0.146937	0.0608985	0.107768
A_44_P379075	6.43406	6.06437	5.87602	6.56504	6.51002	6.34962	5.70552	5.14681	5.21456	0.00402775	0.0306174	6.12482	5.35563	6.47489	0.283891	0.3049	0.111924
A_44_P379347	1.78072	1.6529	1.67512	1.64654	1.55499	1.58747	1.50596	1.50643	1.5105	0.00710184	0.0380392	1.70291	1.50763	1.59633	0.0682944	0.00249469	0.0464167
A_44_P379461	6.53086	6.47657	6.51537	6.39366	6.94019	6.47199	6.06726	5.80863	5.75667	0.00791156	0.0395518	6.5076	5.87752	6.60195	0.0279645	0.166363	0.295536
A_44_P379496	1.72646	1.55841	1.62835	1.49582	3.69128	1.99619	5.07443	4.35909	4.43923	0.00494142	0.0330067	1.63774	4.62425	2.39443	0.0844191	0.391921	1.15063
A_44_P379619	5.83167	6.11238	5.91845	6.213	6.48552	6.4047	7.11416	7.04054	6.88037	0.000217721	0.0104448	5.95417	7.01169	6.36774	0.143725	0.11954	0.139971
A_44_P379805	7.10488	7.22478	7.1993	6.65696	6.84054	6.88173	6.54269	6.73305	6.61149	0.00113988	0.0190044	7.17632	6.62908	6.79308	0.0631688	0.0963929	0.119663
A_44_P379864	8.06161	7.97639	7.73604	8.07393	8.16321	8.27095	8.40178	8.43284	8.71275	0.00841549	0.040498	7.92468	8.51579	8.16936	0.168833	0.171282	0.0986531
A_44_P380300	3.87355	3.79991	4.09724	3.61135	3.86037	3.9427	4.99392	4.69695	4.34591	0.00694076	0.0377029	3.92357	4.67893	3.80481	0.154846	0.324379	0.17252
A_44_P380315	7.96091	8.08306	8.26712	7.98869	7.90036	7.83104	7.6352	7.4192	7.5333	0.0027548	0.0273107	8.1037	7.52923	7.9067	0.154143	0.10806	0.0790152
A_44_P380365	1.61629	1.60909	1.58197	1.46017	1.47565	1.46086	1.44371	1.43866	1.47126	3.56774e-05	0.00574208	1.60245	1.45121	1.46556	0.018098	0.017545	0.00874342
A_44_P380421	4.76024	4.98589	4.71914	5.11867	5.62093	5.207	5.58258	5.47446	5.91434	0.0099603	0.043404	4.82176	5.65713	5.31553	0.143621	0.229219	0.268141
A_44_P380992	5.70512	5.65252	5.52168	6.03846	5.99367	6.32128	5.41105	5.35946	5.48158	0.00107265	0.0187609	5.62644	5.41736	6.1178	0.0944611	0.0613018	0.177631
A_44_P381207	1.64741	1.59681	1.59294	1.52888	1.50446	1.52166	1.4545	1.45291	1.49731	0.000898022	0.0174062	1.61239	1.46824	1.51833	0.0303954	0.0251858	0.0125452
A_44_P381599	4.01658	3.6613	4.71526	3.35391	3.25609	3.49552	2.38819	1.8336	1.46377	0.00164309	0.021676	4.13105	1.89519	3.3685	0.536223	0.465279	0.12038
A_44_P381686	2.81539	2.81311	2.51514	1.40619	2.42263	2.3133	4.07492	4.84485	3.61409	0.00488	0.0328794	2.71455	4.17795	2.04737	0.172693	0.621817	0.557966
A_44_P381690	2.54117	3.82093	3.66347	3.9853	3.37038	3.89228	5.55404	5.44514	4.71938	0.00945243	0.0424905	3.34186	5.23952	3.74932	0.697872	0.453733	0.331451
A_44_P381764	3.02013	1.85224	1.87503	2.51682	3.65988	3.6644	4.6119	4.40633	4.6601	0.00614983	0.0360507	2.24913	4.55944	3.28037	0.667802	0.134776	0.661256
A_44_P382053	5.93752	6.27275	6.26793	3.32465	3.79448	2.09305	3.87773	5.70312	5.25018	0.00694561	0.0377156	6.1594	4.94368	3.07073	0.192173	0.950508	0.878678
A_44_P382312	6.98015	7.39191	7.32835	6.5407	6.59864	6.46225	6.96159	6.65457	6.87501	0.00542955	0.0344909	7.23347	6.83039	6.53386	0.221671	0.158299	0.0684508
A_44_P382372	6.86676	6.94759	6.7462	7.31349	7.32788	7.24044	7.06357	6.89527	6.88475	0.00184217	0.0227196	6.85352	6.94786	7.29393	0.101347	0.100342	0.046887
A_44_P382525	8.35393	8.24173	8.32708	8.64593	8.62332	8.64703	8.5775	8.55111	8.79596	0.00439843	0.031559	8.30758	8.64152	8.63876	0.0585877	0.134393	0.0133804
[truncated: 1,429 more rows]

## Sheet: additional file 2
Probe Name	p Values	Fold Change(M/C)	p Values	Fold Change(H/C)	H21_NS	H22_NS	H23_NS	H21_flags	H22_flags	H23_flags	M1_NS	M3_NS	M5_NS	M1_flags	M3_flags	M5_flags	C41_NS	C42_NS	C43_NS	C41_flags	C42_flags	C43_flags	GeneSymbol	Description	EntrezGeneID	TIGRID	UniGeneID	Chromosome_End_Index_Avadis_	Chromosome_Number_Avadis_	Chromosome_Start_Index_Avadis_	Chromosome_Strand_Avadis_	Cytoband	EnsemblID	GenbankAccession	GeneName	GenomicCoordinates	Go	RefSeqAccession
A_44_P463831	0.0014633	2.03515	0.0215296	1.55222	4.41669	4.41373	4.02088	P	P	A	4.69205	4.7684	4.59265	P	P	P	3.74402	3.48178	3.74184	A	A	A	Zfp423	Rattus norvegicus zinc finger protein 423 (Zfp423), mRNA [NM_053583]	94188	NP069557	Rn.9981	20713650	chr19	20609132	+	rn|19p11	ENSRNOT00000020028	NM_053583	zinc finger protein 423	chr19:20609132-20713650	GO:0005515|GO:0016564|GO:0003700|GO:0016563|GO:0005634|GO:0007275|GO:0030154|GO:0046872|GO:0007399|GO:0005622|GO:0045941|GO:0016481|GO:0008270	NM_053583
A_44_P126506	0.0255236	0.613025	0.122369	1.24492	4.65142	4.22921	4.5527	P	P	P	3.21065	3.43537	3.71057	A	P	P	4.10627	4.11887	4.28593	P	P	P	Pomt2	Rattus norvegicus protein-O-mannosyltransferase 2 (Pomt2), mRNA [NM_001047114]	688673	TC644957	Rn.99801	111249920	chr6	111249861	-	rn|6q31	ENSRNOT00000016242	NM_001047114	protein-O-mannosyltransferase 2	chr6:111249920-111249861	GO:0000030|GO:0016020|GO:0006493|GO:0016757	NM_001047114
A_43_P11883	0.0049694	1.88954	0.101545	1.26809	5.36457	5.73167	5.47079	P	P	P	6.28912	6.09744	5.90635	P	P	P	5.39625	5.15529	4.98252	P	P	P	Tgfbr3	Rattus norvegicus transforming growth factor, beta receptor III (Tgfbr3), mRNA [NM_017256]	29610	TC574079	Rn.9953	3239367	chr14	3239308	+	rn|14p22	ENSRNOT00000002867	NM_017256	transforming growth factor, beta receptor III	chr14:3239308-3239367	GO:0005515|GO:0055010|GO:0050680|GO:0046332|GO:0005615|GO:0007243|GO:0005114|GO:0043231|GO:0034695|GO:0007179|GO:0048603|GO:0032354|GO:0009986|GO:0043393|GO:0030509|GO:0030165|GO:0005160|GO:0060038|GO:0060347|GO:0001889|GO:0007181|GO:0005887|GO:0016049|GO:0060389|GO:0009897|GO:0005886|GO:0005783|GO:0031100|GO:0001837|GO:0005539|GO:0010719|GO:0034673|GO:0060317|GO:0060318|GO:0006955|GO:0005737|GO:…	NM_017256
A_44_P515484	0.0324297	2.80805	0.0412455	2.56313	11.1409	10.7478	10.4291	P	P	P	10.5426	10.8764	11.2858	P	P	P	9.12437	10.0691	8.83737	P	P	P	Tat	Rattus norvegicus tyrosine aminotransferase (Tat), nuclear gene encoding mitochondrial protein, mRNA [NM_012668]	24813	TC645108	Rn.9947	39863907	chr19	39863848	+	rn|19q12	ENSRNOT00000022721	NM_012668	tyrosine aminotransferase	chr19:39863848-39863907	GO:0006520|GO:0006559|GO:0014070|GO:0006536|GO:0009058|GO:0016847|GO:0004838|GO:0006094|GO:0008483|GO:0051384|GO:0005739|GO:0030170|GO:0006103|GO:0006572|GO:0046689|GO:0006979|GO:0016597	NM_012668
A_43_P12932	0.00226013	3.30038	0.398064	1.24711	2.28932	1.97707	2.85041	A	A	A	4.14946	3.52905	3.7171	P	P	P	1.89072	2.38897	1.96847	A	A	A	Stx1a	Rattus norvegicus syntaxin 1A (brain) (Stx1a), mRNA [NM_053788]	116470	TC576226	Rn.9943	22738418	chr12	22738359	-	rn|12q12	ENSRNOT00000049601	NM_053788	syntaxin 1A (brain)	chr12:22738418-22738359	GO:0005515|GO:0043005|GO:0043008|GO:0016081|GO:0030054|GO:0005886|GO:0042641|GO:0045202|GO:0007268|GO:0006886|GO:0045921|GO:0001948|GO:0017156|GO:0000149|GO:0017157|GO:0006836|GO:0030672|GO:0019717|GO:0030141|GO:0030674|GO:0032028|GO:0070044|GO:0046982|GO:0019904|GO:0031410|GO:0043234|GO:0005484|GO:0047485|GO:0009629|GO:0019855|GO:0017022|GO:0016021|GO:0070032|GO:0001956|GO:0048306	NM_053788
A_44_P1019710	0.0345576	2.24428	0.0100879	1.28502	7.74971	7.89244	7.93184	P	P	P	8.18124	8.97805	8.72385	P	P	P	7.39744	7.59168	7.49925	P	P	P	Slc39a6	Rattus norvegicus solute carrier family 39 (zinc transporter), member 6 (Slc39a6), mRNA [NM_001024745]	291733	TC574711	Rn.99415	16353858	chr18	16353799	-	rn|18p12	ENSRNOT00000036306	NM_001024745	solute carrier family 39 (zinc transporter), member 6	chr18:16353858-16353799	GO:0005886|GO:0005783|GO:0046873|GO:0006829|GO:0016021|GO:0055085|GO:0006811	NM_001024745
A_43_P21196	0.0257863	1.80889	0.355828	1.05356	6.51994	6.37206	6.31555	P	P	P	7.42829	7.15239	6.93099	P	P	P	6.34106	6.28711	6.36038	P	P	P	Dbr1	Rattus norvegicus debranching enzyme homolog 1 (S. cerevisiae) (Dbr1), mRNA [NM_001109437]	681234	TC599902	Rn.99081	104453624	chr8	104453565	+	rn|8q31	ENSRNOT00000019769	NM_001109437	debranching enzyme homolog 1 (S. cerevisiae)	chr8:104453565-104453624	GO:0008419|GO:0000398|GO:0000375|GO:0016788|GO:0005634	NM_001109437
A_44_P484579	0.0156312	2.17186	0.860685	1.02967	5.38083	5.37508	4.88915	P	P	P	6.48495	5.86354	6.49404	P	P	P	4.88931	5.16433	5.4612	P	P	P	Nos1ap	Rattus norvegicus nitric oxide synthase 1 (neuronal) adaptor protein (Nos1ap), mRNA [NM_138922]	192363	TC574844	Rn.9903	86159916	chr13	86159857	-	rn|13q24	ENSRNOT00000032218	NM_138922	nitric oxide synthase 1 (neuronal) adaptor protein	chr13:86159916-86159857	GO:0050998|GO:0005515|GO:0005737|GO:0050999|GO:0030165|GO:0007269	NM_138922
A_44_P429476	0.0378947	2.01807	0.421509	1.30428	5.09009	3.99106	4.64152	P	P	P	4.79438	5.24188	5.65349	P	P	P	3.96997	4.37719	4.39178	A	P	P	Znf295	Rattus norvegicus zinc finger protein 295 (Znf295), mRNA [NM_001107105]	304056		Rn.98941	37961709	chr11	37961650	-	rn|11q12	ENSRNOT00000002211	NM_001107105	zinc finger protein 295	chr11:37961709-37961650	GO:0005622|GO:0005515|GO:0008270|GO:0046872	NM_001107105
A_44_P215108	0.0197088	0.191364	0.16273	0.459587	4.2909	4.22119	4.33741	P	P	P	2.16588	2.80848	3.6827	A	A	P	6.13481	4.63643	5.00091	P	P	P	Lepr	Rattus norvegicus leptin receptor mRNA, alternatively spliced, exon 1c, partial cds. [AF121333]	24536	NP206707	Rn.9891	122395352	chr5	122385660	+	rn|5q33		AF121333	leptin receptor	chr5:122385660-122395352	GO:0005515|GO:0043627|GO:0007565|GO:0004896|GO:0005886|GO:0001542|GO:0001525|GO:0006091|GO:0042221|GO:0005615|GO:0016500|GO:0016020|GO:0031669|GO:0033210|GO:0042755|GO:0043410|GO:0017046|GO:0035094
A_44_P459144	0.0377143	2.01801	0.231754	1.31448	10.1634	10.2858	9.97124	P	P	P	10.9615	10.5007	10.7937	P	P	P	9.74172	9.23649	10.1375	P	P	P	Inhba	Rattus norvegicus inhibin beta-A (Inhba), mRNA [NM_017128]	29200	TC578122	Rn.9874	57244663	chr17	57244604	-	rn|17q12.1	ENSRNOT00000019272	NM_017128	inhibin beta-A	chr17:57244663-57244604	GO:0005515|GO:0042541|GO:0030308|GO:0008285|GO:0042802|GO:0000082|GO:0002244|GO:0045944|GO:0007050|GO:0048184|GO:0048333|GO:0043509|GO:0001707|GO:0046982|GO:0005102|GO:0005576|GO:0010551|GO:0006917|GO:0045786|GO:0005125|GO:0032925|GO:0005179|GO:0045648|GO:0043512|GO:0008083|GO:0040007	NM_017128
A_43_P15662	0.0124859	2.59247	0.000359098	3.28506	6.75322	6.91236	6.61886	P	P	P	6.14605	6.32146	6.74095	P	P	P	4.99634	5.01302	5.13812	P	P	P	Tfrc	Rattus norvegicus transferrin receptor (Tfrc), mRNA [NM_022712]	64678	TC592188	Rn.98672	69977420	chr11	69977361	-	rn|11q22		NM_022712	transferrin receptor	chr11:69977420-69977361	GO:0048471|GO:0005886|GO:0051087|GO:0010042|GO:0006879|GO:0005739|GO:0010035|GO:0004998|GO:0010039|GO:0006508|GO:0004872|GO:0032526|GO:0070062|GO:0001666|GO:0042470|GO:0010033|GO:0007584|GO:0007568|GO:0005576|GO:0006953|GO:0006897|GO:0005905|GO:0016023|GO:0030544|GO:0008233|GO:0016021|GO:0046688|GO:0005768	NM_022712
A_44_P164972	0.00645794	1.70621	0.00539754	2.53254	4.90433	5.50056	5.10095	P	P	P	4.6427	4.76523	4.43453	P	P	P	3.68304	3.78791	4.05274	A	P	P		BF417032 UI-R-CN0-blb-b-07-0-UI.s1 UI-R-CN0 Rattus norvegicus cDNA clone UI-R-CN0-blb-b-07-0-UI 3', mRNA sequence [BF417032]	NA		Rn.98672	69976589	chr11	69976530	+	rn|11q22		BF417032		chr11:069976530-069976589
A_44_P214811	0.000140228	2.33053	9.07e-05	2.81041	11.3582	11.4963	11.3729	P	P	P	11.0262	11.1948	11.1935	P	P	P	9.8195	9.89781	10.0336	P	P	P	Tfrc	Rattus norvegicus transferrin receptor (Tfrc), mRNA [NM_022712]	64678	TC588361	Rn.98672	69976687	chr11	69976628	-	rn|11q22		NM_022712	transferrin receptor	chr11:69976687-69976628	GO:0048471|GO:0005886|GO:0051087|GO:0010042|GO:0006879|GO:0005739|GO:0010035|GO:0004998|GO:0010039|GO:0006508|GO:0004872|GO:0032526|GO:0070062|GO:0001666|GO:0042470|GO:0010033|GO:0007584|GO:0007568|GO:0005576|GO:0006953|GO:0006897|GO:0005905|GO:0016023|GO:0030544|GO:0008233|GO:0016021|GO:0046688|GO:0005768	NM_022712
A_44_P164974	0.0186872	1.55042	0.0028071	2.12586	4.62503	4.98668	4.65918	P	P	P	4.41561	4.41792	4.07293	P	P	P	3.89309	3.48601	3.62593	A	A	A		AA998680 UI-R-C0-ig-h-03-0-UI.s1 UI-R-C0 Rattus norvegicus cDNA clone UI-R-C0-ig-h-03-0-UI 3', mRNA sequence [AA998680]	NA		Rn.98672	69976548	chr11	69976489	+	rn|11q22		AA998680		chr11:069976489-069976548
A_44_P718045	0.00496057	0.649297	0.127784	0.849569	4.91374	4.86302	5.18697	P	P	P	4.73804	4.44989	4.61926	P	P	P	5.15383	5.35566	5.17255	P	P	P	Ankfy1	Rattus norvegicus ankyrin repeat and FYVE domain containing 1 (Ankfy1), mRNA [NM_001107018]	303292	TC591058	Rn.98554	59652414	chr10	59652355	+	rn|10q24	ENSRNOT00000021816	NM_001107018	ankyrin repeat and FYVE domain containing 1	chr10:59652355-59652414	GO:0005515|GO:0008270|GO:0046872	NM_001107018
A_44_P1030098	0.000117887	0.281486	0.0037204	0.305145	6.39731	6.62603	6.85079	P	P	P	6.63557	6.49801	6.4184	P	P	P	8.33888	8.41084	8.29489	P	P	P	Cdc45l	Rattus norvegicus CDC45 cell division cycle 45-like (S. cerevisiae) (Cdc45l), mRNA [NM_001105866]	287961	TC641538	Rn.98535	1221875	chr11_random	1221816	+			NM_001105866	CDC45 cell division cycle 45-like (S. cerevisiae)	chr11_random:1221816-1221875	GO:0006260|GO:0005515|GO:0005813|GO:0005737|GO:0006270|GO:0005654|GO:0005634|GO:0051301	NM_001105866
A_44_P264837	0.00234697	0.561874	0.0748532	0.696245	9.34917	8.73557	9.07561	P	P	P	8.84825	8.65665	8.7856	P	P	P	9.57124	9.45486	9.75053	P	P	P	Gtpbp6	Rattus norvegicus GTP binding protein 6 (putative) (Gtpbp6), mRNA [NM_001135840]	363931	TC626657	Rn.98504	46725850	chr12	46725712	+	rn|12q16	ENSRNOT00000056632	NM_001135840	GTP binding protein 6 (putative)	chr12:46725712-46725850	GO:0005622|GO:0005525	NM_001135840
A_44_P441328	0.0226909	1.91903	0.00966793	2.75356	5.31234	5.49814	4.72051	P	P	P	4.36149	4.95827	4.69607	P	P	P	3.79448	3.35993	4.0247	A	A	A		BQ211264 UI-R-DY1-cok-k-19-0-UI.s1 NCI_CGAP_DY1 Rattus norvegicus cDNA clone IMAGE:7336557 3', mRNA sequence [BQ211264]	NA		Rn.98492	145010944	chr3	145010885	-	rn|3q41		BQ211264		chr3:145010944-145010885
A_44_P468746	0.0197685	2.81745	0.0815971	1.79927	8.38512	8.60687	8.54519	P	P	P	9.39535	9.09091	8.96653	P	P	P	7.61881	7.11029	8.10533	P	P	P	Tubb6	Rattus norvegicus tubulin, beta 6 (Tubb6), mRNA [NM_001025675]	307351	TC577346	Rn.98430	63928733	chr18	63928674	+	rn|18q12.1	ENSRNOT00000024947	NM_001025675	tubulin, beta 6	chr18:63928674-63928733	GO:0051258|GO:0000166|GO:0005198|GO:0005874|GO:0003924|GO:0005525|GO:0007018	NM_001025675
A_44_P393696	0.00177371	0.363398	0.00163955	0.202077	4.16981	3.59688	4.16171	P	A	P	4.57396	5.06706	4.85657	P	P	P	6.17294	6.49459	6.2325	P	P	P	LOC308990	Rattus norvegicus hypothetical protein LOC308990 (LOC308990), mRNA [NM_001025001]	308990	TC576160	Rn.98391	186345313	chr1	186345254	+	rn|1q36	ENSRNOT00000022765	NM_001025001	hypothetical protein LOC308990	chr1:186345254-186345313	GO:0016020|GO:0016021	NM_001025001
A_44_P186902	0.0124429	1.5846	0.00396064	1.89115	9.29537	9.20673	9.47824	P	P	P	9.15103	9.1287	8.93934	P	P	P	8.27932	8.29762	8.63116	P	P	P	Pgpep1	Rattus norvegicus pyroglutamyl-peptidase I (Pgpep1), mRNA [NM_201988]	290648	TC578328	Rn.98380	19284277	chr16	19284218	+	rn|16p14	ENSRNOT00000026597	NM_201988	pyroglutamyl-peptidase I	chr16:19284218-19284277	GO:0005737|GO:0006508|GO:0008233|GO:0008234|GO:0005829	NM_201988
A_44_P309202	0.00190905	1.76871	0.0443952	1.60736	12.3762	12.5188	12.0142	P	P	P	12.5602	12.434	12.3681	P	P	P	11.6145	11.6751	11.6103	P	P	P	Slc25a22	Rattus norvegicus solute carrier family 25 (mitochondrial carrier, glutamate), member 22 (Slc25a22), nuclear gene encoding mitochondrial protein, mRNA [NM_001014027]	309111	TC575931	Rn.98367	201617768	chr1	201617709	-	rn|1q41	ENSRNOT00000025240	NM_001014027	solute carrier family 25 (mitochondrial carrier, glutamate), member 22	chr1:201617768-201617709	GO:0005739|GO:0005515|GO:0015813|GO:0016020|GO:0005488|GO:0005313|GO:0005743|GO:0016021|GO:0055085	NM_001014027
A_44_P479305	0.0144448	2.10572	0.0146289	1.89287	5.77122	5.45063	5.26928	P	P	P	6.01143	5.5402	5.36692	P	P	P	4.74217	4.73754	4.23963	P	P	A		AA924557 UI-R-A1-dz-g-04-0-UI.s1 UI-R-A1 Rattus norvegicus cDNA clone UI-R-A1-dz-g-04-0-UI 3' similar to gi [AA924557]	NA		Rn.98367	201618179	chr1	201618120	+	rn|1q41		AA924557		chr1:201618120-201618179
A_42_P837214	0.000413437	4.89415	0.00049641	4.71291	14.0327	14.1954	13.9203	P	P	P	14.1052	14.247	13.9584	P	P	P	11.5735	12.0436	11.7963	P	P	P	Mgmt	Rattus norvegicus O-6-methylguanine-DNA methyltransferase (Mgmt), mRNA [NM_012861]	25332	TC580831	Rn.9836	196866889	chr1	196866830	+	rn|1q41	ENSRNOT00000021537	NM_012861	O-6-methylguanine-DNA methyltransferase	chr1:196866830-196866889	GO:0014070|GO:0045471|GO:0042493|GO:0003908|GO:0005509|GO:0008168|GO:0009636|GO:0005634|GO:0045739|GO:0003824|GO:0003677|GO:0071479|GO:0006974|GO:0051593|GO:0071407|GO:0060644|GO:0043281|GO:0006281|GO:0006307|GO:0060548|GO:0005654|GO:0034599|GO:0016740	NM_012861
A_44_P1013385	0.0144589	1.53553	0.0141196	1.47152	8.92752	9.06204	9.13695	P	P	P	9.29481	8.91684	9.08193	P	P	P	8.54441	8.6142	8.28303	P	P	P	Eef1e1	Rattus norvegicus eukaryotic translation elongation factor 1 epsilon 1 (Eef1e1), mRNA [NM_001106106]	291057	TC614423	Rn.98308	32221025	chr17	32220067	+	rn|17p12	ENSRNOT00000022065	NM_001106106	eukaryotic translation elongation factor 1 epsilon 1	chr17:32220067-32221025	GO:0005515|GO:0005737|GO:0043065|GO:0008285|GO:0043517|GO:0005634|GO:0003746|GO:0005829	NM_001106106
A_44_P185441	0.0184331	2.23879	0.285624	1.23398	3.60898	3.27866	3.59547	A	A	A	4.29117	4.69624	4.01542	P	P	P	2.71349	3.35026	3.43172	A	A	A	Tnfrsf21	Rattus norvegicus tumor necrosis factor receptor superfamily, member 21 (Tnfrsf21), mRNA [NM_001108207]	316256	TC584122	Rn.98293	13592406	chr9	13590088	-	rn|9q12	ENSRNOT00000015918	NM_001108207	tumor necrosis factor receptor superfamily, member 21	chr9:13592406-13590088	GO:0005515|GO:0030424|GO:0007165|GO:0004872|GO:0051402	NM_001108207
A_44_P1025349	0.0407874	0.404699	0.0121513	0.267598	9.34833	9.66443	9.95544	P	P	P	10.4588	10.3151	10.013	P	P	P	10.8982	11.7669	11.8862	P	P	P	Uba7	Rattus norvegicus ubiquitin-like modifier activating enzyme 7 (Uba7), mRNA [NM_001106856]	301000	TC603061	Rn.98275	113253486	chr8	113253427	+	rn|8q32	ENSRNOT00000046483	NM_001106856	ubiquitin-like modifier activating enzyme 7	chr8:113253427-113253486	GO:0000166|GO:0032020|GO:0019941|GO:0016874|GO:0008152|GO:0008641|GO:0005524|GO:0006464|GO:0019782	NM_001106856
A_44_P369399	0.0190315	2.09315	0.00545676	1.57445	7.78037	7.72556	7.75614	P	P	P	7.87238	8.07924	8.47691	P	P	P	7.21558	7.04962	7.02533	P	P	P	Rab38	Rattus norvegicus RAB38, member RAS oncogene family (Rab38), mRNA [NM_145774]	252916	TC578654	Rn.9824	144864125	chr1	144864066	+	rn|1q32	ENSRNOT00000022538	NM_145774	RAB38, member RAS oncogene family	chr1:144864066-144864125	GO:0005794|GO:0006996|GO:0005783|GO:0003924|GO:0005625|GO:0005626|GO:0005525|GO:0005829|GO:0005737|GO:0042598|GO:0060155|GO:0016192|GO:0019003	NM_145774
A_44_P883893	0.0245299	1.84759	0.183155	0.610142	4.42811	3.50257	4.89693	P	A	P	5.96464	6.20103	5.74706	P	P	P	4.92454	4.82348	5.45961	P	P	P	Acss1	Rattus norvegicus acyl-CoA synthetase short-chain family member 1 (Acss1), nuclear gene encoding mitochondrial protein, mRNA [NM_001106524]	296259	TC607908	Rn.98236	141259757	chr3	141259698	-	rn|3q41	ENSRNOT00000009627	NM_001106524	acyl-CoA synthetase short-chain family member 1	chr3:141259757-141259698	GO:0005739|GO:0005515|GO:0016208|GO:0019542|GO:0005759|GO:0008152|GO:0019413|GO:0003987|GO:0006085|GO:0003824	NM_001106524
A_44_P243111	0.0145868	0.63673	0.0234658	0.692388	6.01035	6.28133	6.25907	P	P	P	6.00653	5.90046	6.27083	P	P	P	6.51125	6.71657	6.90285	P	P	P	Rab3d	Rattus norvegicus RAB3D, member RAS oncogene family (Rab3d), mRNA [NM_080580]	140665	TC596647	Rn.9822	21012691	chr8	21012632	-	rn|8q13	ENSRNOT00000015609	NM_080580	RAB3D, member RAS oncogene family	chr8:21012691-21012632	GO:0042588|GO:0030133|GO:0005739|GO:0005515|GO:0018125|GO:0005886|GO:0000166|GO:0007264|GO:0017157|GO:0015031|GO:0005525	NM_080580
A_44_P267041	0.0272415	0.464579	0.030467	0.412662	5.0195	5.21107	5.11202	P	P	P	5.04787	5.25811	5.51739	P	P	P	5.87364	6.57663	6.61602	P	P	P	Lat	Rattus norvegicus linker for activation of T cells (Lat), mRNA [NM_030853]	81511	TC581463	Rn.9773	185453574	chr1	185450886	-	rn|1q36	ENSRNOT00000023563	NM_030853	linker for activation of T cells	chr1:185453574-185450886	GO:0001772|GO:0005515|GO:0010467|GO:0043303|GO:0050863|GO:0019722|GO:0005886|GO:0023034|GO:0007265|GO:0007165|GO:0006955|GO:0006954|GO:0007229|GO:0005070|GO:0016021	NM_030853
A_44_P360767	0.0365986	2.93077	0.3712	1.70098	8.64228	10.4674	9.6478	P	P	P	9.80086	11.0678	10.5232	P	P	P	9.30598	8.63902	8.98654	P	P	P	Spink3	Rattus norvegicus serine peptidase inhibitor, Kazal type 3 (Spink3), mRNA [NM_012674]	24833	NP069835	Rn.9767	37144182	chr18	37135620	-	rn|18p11	ENSRNOT00000018110	NM_012674	serine peptidase inhibitor, Kazal type 3	chr18:37144182-37135620	GO:0005515|GO:0004867|GO:0005576|GO:0030414|GO:0005615|GO:0045861	NM_012674
A_44_P307625	0.00579234	0.575934	0.483452	1.0811	6.73934	6.33865	6.57422	P	P	P	5.54073	5.52933	5.85952	P	P	P	6.52733	6.31016	6.49569	P	P	P	Ptgfr	Rattus norvegicus prostaglandin F receptor (Ptgfr), mRNA [NM_013115]	25652	TC574753	Rn.97602	3457565	chr2_random	3457506	+			NM_013115	prostaglandin F receptor	chr2_random:3457506-3457565	GO:0005886|GO:0004930|GO:0005576|GO:0004872|GO:0016021|GO:0004958	NM_013115
A_42_P509766	0.0222985	0.658918	0.899445	0.986097	9.22868	9.06378	9.4891	P	P	P	8.58016	8.53395	8.92268	P	P	P	9.39838	9.05922	9.39139	P	P	P	Ppara	Rattus norvegicus peroxisome proliferator activated receptor alpha (Ppara), mRNA [NM_013196]	25747	TC576513	Rn.9753	123807075	chr7	123807016	+	rn|7q34	ENSRNOT00000030082	NM_013196	peroxisome proliferator activated receptor alpha	chr7:123807016-123807075	GO:0005515|GO:0003700|GO:0016563|GO:0003707|GO:0032099|GO:0003706|GO:0005634|GO:0010871|GO:0045776|GO:0046872|GO:0008289|GO:0007507|GO:0045944|GO:0008144|GO:0006631|GO:0004879|GO:0001666|GO:0032868|GO:0006355|GO:0010745|GO:0019904|GO:0046321|GO:0010553|GO:0019217|GO:0010887|GO:0043565|GO:0070215|GO:0008544|GO:0010891|GO:0042060|GO:0042157|GO:0008270	NM_013196
A_43_P15246	0.0122647	1.77456	0.170485	1.15281	4.91004	4.73116	4.98545	P	P	P	5.2181	5.70491	5.54056	P	P	P	4.79438	4.73195	4.47738	P	P	P	Pthlh	Rattus norvegicus parathyroid hormone-like hormone (Pthlh), mRNA [NM_012636]	24695	TC579733	Rn.9750	184887791	chr4	184887732	-	rn|4q44	ENSRNOT00000067438	NM_012636	parathyroid hormone-like hormone	chr4:184887791-184887732	GO:0010468|GO:0008284|GO:0048286|GO:0030819|GO:0005576|GO:0005634|GO:0005575|GO:0043433|GO:0005622|GO:0060659|GO:0001501|GO:0001958|GO:0005737|GO:0002076|GO:0005179|GO:0007492|GO:0016485|GO:0060649|GO:0030855|GO:0043129|GO:0032331|GO:0007189	NM_012636
A_44_P605240	0.00435496	2.43818	0.084334	3.09556	6.56325	5.17686	5.07009	P	P	P	5.73836	5.21636	5.28066	P	P	P	4.21121	4.30123	3.89228	P	P	A	LOC100361688	PREDICTED: Rattus norvegicus hypothetical protein LOC100361688 (LOC100361688), mRNA [XM_002725862]	100361688		Rn.9740	32008057	chr20	32007998	-	rn|20q11		XM_002725862	hypothetical protein LOC100361688	chr20:32008057-32007998		XM_002725862
A_44_P346637	0.00792838	0.49952	0.547786	0.87758	4.53255	3.90194	5.9254	P	P	P	4.34332	4.19491	4.14259	P	P	P	5.4706	5.15917	5.02611	P	P	P	Pcp4	Rattus norvegicus Purkinje cell protein 4 (Pcp4), mRNA [NM_013002]	25510	TC622458	Rn.9736	36889357	chr11	36889298	+	rn|11q12	ENSRNOT00000002221	NM_013002	Purkinje cell protein 4	chr11:36889298-36889357	GO:0005634|GO:0005829	NM_013002
A_43_P11579	0.0076716	4.66368	0.233751	1.69593	2.5791	1.22737	2.09877	A	A	A	3.81529	3.62703	3.0388	P	P	P	1.23904	1.43319	1.24428	A	A	A		Neuronal acetylcholine receptor subunit alpha-7 Precursor [Source:UniProtKB/Swiss-Prot;Acc:Q05941] [ENSRNOT00000055925]	NA	TC578252	Rn.9698	117587126	chr1	117587067	-	rn|1q22	ENSRNOT00000055925	L31619		chr1:117587126-117587067
A_43_P11370	0.0373052	0.618271	0.177447	0.812586	8.43468	8.43783	8.60957	P	P	P	8.37111	8.09763	7.77671	P	P	P	8.99388	8.50255	8.84782	P	P	P	Plp2	Rattus norvegicus proteolipid protein 2 (colonic epithelium-enriched) (Plp2), mRNA [NM_207601]	302562	TC579798	Rn.96974	26878509	chrX	26878451	+	rn|Xq13	ENSRNOT00000045256	NM_207601	proteolipid protein 2 (colonic epithelium-enriched)	chrX:26878451-26878509	GO:0005515|GO:0005886|GO:0016021|GO:0019956	NM_207601
A_44_P397725	9.04e-05	2.922	0.158851	0.655763	3.77072	3.2826	4.36479	A	A	P	6.134	6.0389	5.90704	P	P	P	4.54357	4.55548	4.33885	P	P	P	Mog	Rattus norvegicus myelin oligodendrocyte glycoprotein (Mog), mRNA [NM_022668]	24558	TC577963	Rn.9687	1610337	chr20	1610278	+	rn|20p12	ENSRNOT00000001008	NM_022668	myelin oligodendrocyte glycoprotein	chr20:1610278-1610337	GO:0016020|GO:0034126|GO:0016021|GO:0007155	NM_022668
A_44_P373483	0.0175823	0.638285	0.433902	0.886253	9.76317	9.25338	9.76484	P	P	P	9.24522	9.14331	9.02132	P	P	P	9.55875	9.79801	9.97498	P	P	P	Slco2a1	Rattus norvegicus solute carrier organic anion transporter family, member 2a1 (Slco2a1), mRNA [NM_022667]	24546	TC575068	Rn.9671	108098261	chr8	108098202	+	rn|8q32	ENSRNOT00000012162	NM_022667	solute carrier organic anion transporter family, member 2a1	chr8:108098202-108098261	GO:0005515|GO:0005215|GO:0015132|GO:0016020|GO:0015732|GO:0016021|GO:0055085	NM_022667
A_44_P374902	0.0131257	1.62801	0.988323	1.00133	5.48409	5.26506	5.68888	P	P	P	6.00634	6.27797	6.27199	P	P	P	5.26486	5.70312	5.46182	P	P	P	Zfp384	Rattus norvegicus zinc finger protein 384 (Zfp384), transcript variant 1, mRNA [NM_133429]	171018	NP300156	Rn.9637	161145691	chr4	161145632	+	rn|4q42	ENSRNOT00000023240	NM_133429	zinc finger protein 384	chr4:161145632-161145691	GO:0005622|GO:0017124|GO:0005730|GO:0042156|GO:0008270|GO:0005634|GO:0003676|GO:0005925|GO:0003677|GO:0046872|GO:0045449|GO:0006913	NM_133429
A_43_P11733	0.0457702	1.88274	0.585553	0.890949	3.51281	3.71685	4.07963	A	A	P	5.18594	4.92284	4.38553	P	P	P	3.51557	4.16981	4.09696	A	P	P	Ppard	Rattus norvegicus peroxisome proliferator-activated receptor delta (Ppard), mRNA [NM_013141]	25682	TC576428	Rn.96181	6541791	chr20	6541732	+	rn|20p12	ENSRNOT00000042539	NM_013141	peroxisome proliferator-activated receptor delta	chr20:6541732-6541791	GO:0006629|GO:0030308|GO:0003700|GO:0033189|GO:0016563|GO:0070539|GO:0045684|GO:0005634|GO:0014912|GO:0008289|GO:0007507|GO:0046697|GO:0045909|GO:0008144|GO:0006776|GO:0032024|GO:0004879|GO:0014823|GO:0043066|GO:0005504|GO:0019395|GO:0006635|GO:0010033|GO:0051059|GO:0007566|GO:0003713|GO:0006915|GO:0048662|GO:0006029|GO:0008654|GO:0009749|GO:0032966|GO:0050728|GO:0009299|GO:0015908	NM_013141
A_44_P474722	0.0215187	0.18854	0.0339335	0.331995	3.92012	4.36308	3.15312	P	P	A	2.17002	3.58296	3.14598	A	P	P	5.6396	5.29042	5.50427	P	P	P		Rattus norvegicus TL0ADA4YA01 mRNA sequence. [FQ229064]	NA		Rn.96000	60441075	chr5	60441016	-	rn|5q22		FQ229064		chr5:060441075-060441016
A_44_P328758	0.014253	0.426718	0.370998	0.781978	4.27468	3.32836	4.67224	P	A	P	3.11264	3.16005	3.6286	A	P	P	4.56342	4.59476	4.48509	P	P	P	Acpl2	Rattus norvegicus acid phosphatase-like 2 (Acpl2), mRNA [NM_001007710]	315939	TC574959	Rn.9589	101919609	chr8	101919550	-	rn|8q31	ENSRNOT00000017085	NM_001007710	acid phosphatase-like 2	chr8:101919609-101919550	GO:0016787|GO:0003993|GO:0005576	NM_001007710
A_42_P564712	0.00887154	1.6606	0.596286	0.929056	7.94762	8.47571	7.95747	P	P	P	8.82356	9.18772	8.92373	P	P	P	8.04579	8.27692	8.41792	P	P	P	Taok2	Rattus norvegicus TAO kinase 2 (Taok2), mRNA [NM_022702]	64666	TC573977	Rn.9575	186049212	chr1	186049153	-	rn|1q36	ENSRNOT00000027080	NM_022702	TAO kinase 2	chr1:186049212-186049153	GO:0030036|GO:0008360|GO:0046330|GO:0006950|GO:0005524|GO:0000186|GO:0005737|GO:0000166|GO:0016020|GO:0004674|GO:0048041|GO:0016023|GO:0006468|GO:0016021|GO:0005856|GO:0030659|GO:0016740	NM_022702
A_44_P804315	0.0166234	0.559889	0.0627061	0.766674	11.2063	11.1356	10.8506	P	P	P	10.9234	10.4557	10.4205	P	P	P	11.42	11.2851	11.6391	P	P	P		Q26877_TRYCR (Q26877) Muc.ca-2 protein, partial (8%) [TC613047]	NA	TC613047	Rn.9561	116737157	chr7	116737098	-	rn|7q34		BI395655		chr7:116737157-116737098
A_44_P506910	0.0223402	0.449625	0.249691	0.759894	3.90431	4.16433	4.47001	P	P	P	3.60628	3.2389	3.45451	P	P	P	4.95661	4.17911	4.54212	P	P	P		BM389752 UI-R-CN1-cjp-m-14-0-UI.s1 UI-R-CN1 Rattus norvegicus cDNA clone UI-R-CN1-cjp-m-14-0-UI 3', mRNA sequence [BM389752]	NA		Rn.95276	153745813	chr2	153745754	+	rn|2q31		BM389752		chr2:153745754-153745813
A_44_P214340	0.0256724	0.613075	0.212787	0.893084	4.90309	4.9329	4.93098	P	P	P	4.67459	4.22545	4.18624	P	P	P	5.16812	4.9046	5.16812	P	P	P		BG374235 UI-R-CV1-bsm-h-10-0-UI.s1 UI-R-CV1 Rattus norvegicus cDNA clone UI-R-CV1-bsm-h-10-0-UI 3', mRNA sequence [BG374235]	NA		Rn.94975	90601653	chr10	90601594	-	rn|10q32.1		BG374235		chr10:090601653-090601594
A_44_P380421	0.00950225	1.79367	0.0656762	1.42012	5.11867	5.62093	5.207	P	P	P	5.58258	5.47446	5.91434	P	P	P	4.76024	4.98589	4.71914	P	P	P		AA901045 UI-R-A1-dv-e-06-0-UI.s1 UI-R-A1 Rattus norvegicus cDNA clone UI-R-A1-dv-e-06-0-UI 3' similar to gi [AA901045]	NA		Rn.94891	25150304	chr19	25150245	-	rn|19q11		AA901045		chr19:025150304-025150245
A_44_P219322	0.0221827	0.51881	0.165286	0.804324	6.73125	6.40741	6.33589	P	P	P	5.49692	5.82332	6.20175	P	P	P	6.61561	6.72355	7.06948	P	P	P		Rattus norvegicus cDNA clone IMAGE:7367270. [BC091431]	NA	TC605108	Rn.94887	118363989	chr1	118363930	-	rn|1q22		BC091431		chr1:118363989-118363930
A_44_P324968	0.00784762	0.470281	0.0826928	0.753243	9.49501	9.13231	9.01171	P	P	P	8.66263	8.71314	8.22026	P	P	P	9.47546	9.76932	9.65049	P	P	P		BF413895 UI-R-BJ2-bok-a-05-0-UI.s1 UI-R-BJ2 Rattus norvegicus cDNA clone UI-R-BJ2-bok-a-05-0-UI 3', mRNA sequence [BF413895]	NA		Rn.94887	118363423	chr1	118363364	+	rn|1q22		BF413895		chr1:118363364-118363423
A_44_P998638	0.0281594	1.84216	0.0282387	1.2723	8.40585	8.5709	8.30104	P	P	P	9.27276	8.72682	8.83324	P	P	P	8.00332	8.16526	8.07522	P	P	P	Pprc1	Rattus norvegicus peroxisome proliferator-activated receptor gamma, coactivator-related 1 (Pprc1), mRNA [NM_001106363]	294007	TC617064	Rn.9484	251294351	chr1	251294292	+	rn|1q54	ENSRNOT00000025221	NM_001106363	peroxisome proliferator-activated receptor gamma, coactivator-related 1	chr1:251294292-251294351	GO:0000166|GO:0003676	NM_001106363
A_44_P1042668	0.00196134	0.618655	0.833466	0.984029	7.36113	7.88899	7.5296	P	P	P	7.07591	6.8941	6.84171	P	P	P	7.72987	7.61611	7.54889	P	P	P	Hint3	Histidine triad nucleotide-binding protein 3 (HINT-3)(EC 3.-.-.-)(HINT-4) [Source:UniProtKB/Swiss-Prot;Acc:Q8K3P7] [ENSRNOT00000019047]	246769	TC582328	Rn.9467	27729183	chr1	27729124	+	rn|1p11	ENSRNOT00000019047	XM_001055373	histidine triad nucleotide binding protein 3	chr1:27729124-27729183	GO:0005737|GO:0016787|GO:0005634	XM_001055373
A_44_P1070483	0.039153	1.6238	0.0467625	1.42256	5.37072	5.18956	5.35566	P	P	P	5.25615	5.8236	5.34951	P	P	P	5.03842	4.56838	4.75131	P	P	P		Q68FT6_RAT (Q68FT6) Rhbg protein, partial (9%) [TC626122]	NA	TC626122	Rn.94552	180321464	chr2	180321405	-	rn|2q34		AW920918		chr2:180321464-180321405
A_44_P238556	0.00143662	0.0477958	2.23e-05	0.0461394	2.38926	2.20296	1.90639	A	A	A	1.69974	2.04725	2.74377	A	A	P	6.40558	6.8624	6.54613	P	P	P	Mcpt2	Rattus norvegicus mast cell protease 2 (Mcpt2), mRNA [NM_172044]	29266	TC581344	Rn.9443	34557888	chr15	34557829	+	rn|15p12	ENSRNOT00000027988	NM_172044	mast cell protease 2	chr15:34557829-34557888	GO:0005622|GO:0004252|GO:0006508|GO:0008233	NM_172044
A_44_P474101	0.0282386	0.505376	0.239202	0.789542	4.70806	5.02896	4.43875	P	P	P	4.10163	3.65631	4.44187	P	P	P	4.72266	5.15765	5.31562	P	P	P	Slc7a1	Rattus norvegicus solute carrier family 7 (cationic amino acid transporter, y+ system), member 1 (Slc7a1), mRNA [NM_013111]	25648	TC591804	Rn.9439	7253451	chr12	7253393	+	rn|12p11	ENSRNOT00000001234	NM_013111	solute carrier family 7 (cationic amino acid transporter, y+ system), member 1	chr12:7253393-7253451	GO:0015326|GO:0032006|GO:0015802|GO:0005886|GO:0015181|GO:0006865|GO:0004872|GO:0016021|GO:0015809|GO:0055085	NM_013111
A_44_P431564	0.0454092	1.76794	0.0801441	1.45558	4.47651	4.82348	4.51762	P	P	P	4.55209	4.77728	5.26189	P	P	P	3.8436	4.42905	3.86645	A	P	A	Tal1	Rattus norvegicus T-cell acute lymphocytic leukemia 1 (Tal1), mRNA [NM_001107958]	313507		Rn.9434	135438215	chr5	135437047	+	rn|5q36	ENSRNOT00000035409	NM_001107958	T-cell acute lymphocytic leukemia 1	chr5:135437047-135438215	GO:0005515|GO:0003700|GO:0000118|GO:0042826|GO:0030528|GO:0005634|GO:0019899|GO:0033193	NM_001107958
A_44_P259931	0.0383385	1.51934	0.0101415	1.82183	7.41329	7.14694	7.41708	P	P	P	6.8411	7.01024	7.31578	P	P	P	6.53541	6.17629	6.64518	P	P	P	Arsb	Rattus norvegicus arylsulfatase B (Arsb), mRNA [NM_033443]	25227	TC642349	Rn.94004	24222272	chr2	24222213	+	rn|2q12	ENSRNOT00000014860	NM_033443	arylsulfatase B	chr2:24222213-24222272	GO:0005791|GO:0043627|GO:0005794|GO:0007584|GO:0006914|GO:0008484|GO:0007417|GO:0005764|GO:0046872|GO:0005739|GO:0003943|GO:0051597|GO:0016787|GO:0008152|GO:0004065|GO:0009268	NM_033443
A_43_P10746	0.012544	2.22108	0.00436938	1.96833	13.0983	13.4273	13.2331	P	P	P	13.6706	13.5319	13.02	P	P	P	12.4175	12.0197	12.3773	P	P	P	Tuba4a	Rattus norvegicus tubulin, alpha 4A (Tuba4a), mRNA [NM_001007004]	316531	TC578482	Rn.92961	74496566	chr9	74496507	-	rn|9q33	ENSRNOT00000004797	NM_001007004	tubulin, alpha 4A	chr9:74496566-74496507	GO:0005515|GO:0051258|GO:0005874|GO:0003924|GO:0005576|GO:0005575|GO:0005525|GO:0005829|GO:0003674|GO:0008150|GO:0000166|GO:0005198|GO:0007018	NM_001007004
A_44_P331706	0.00204965	1.59323	0.194403	1.16633	5.8991	5.5098	5.75765	P	P	P	6.13669	6.09814	6.30014	P	P	P	5.37875	5.52005	5.61837	P	P	P	Dnajb5	Rattus norvegicus DnaJ (Hsp40) homolog, subfamily B, member 5 (Dnajb5), mRNA [NM_001108004]	313811	TC631334	Rn.92865	59445941	chr5	59445882	+	rn|5q22	ENSRNOT00000000142	NM_001108004	DnaJ (Hsp40) homolog, subfamily B, member 5	chr5:59445882-59445941	GO:0006986|GO:0006457|GO:0031072|GO:0051082	NM_001108004
A_44_P135224	0.0139649	2.17159	0.0538583	1.76385	7.32901	6.98412	6.53521	P	P	P	7.00136	7.64505	7.12639	P	P	P	5.796	6.34645	6.2961	P	P	P	Plk3	Rattus norvegicus polo-like kinase 3 (Drosophila) (Plk3), mRNA [NM_022187]	58936	TC602336	Rn.9284	137444203	chr5	137444034	-	rn|5q36	ENSRNOT00000025197	NM_022187	polo-like kinase 3 (Drosophila)	chr5:137444203-137444034	GO:0005515|GO:0004672|GO:0000166|GO:0004674|GO:0048169|GO:0006468|GO:0042995|GO:0042801|GO:0005524|GO:0030425|GO:0016740	NM_022187
A_44_P543283	0.00351025	2.30397	0.00357729	2.22502	5.33145	5.06955	4.95121	P	P	P	5.13298	5.41073	4.94812	P	P	P	3.68949	4.02034	4.16698	A	P	P	Plk3	Rattus norvegicus polo-like kinase 3 (Drosophila) (Plk3), mRNA [NM_022187]	58936	TC602336	Rn.9284	137447549	chr5	137446673	-	rn|5q36	ENSRNOT00000025197	NM_022187	polo-like kinase 3 (Drosophila)	chr5:137447549-137446673	GO:0005515|GO:0004672|GO:0000166|GO:0004674|GO:0048169|GO:0006468|GO:0042995|GO:0042801|GO:0005524|GO:0030425|GO:0016740	NM_022187
A_44_P341298	0.0327789	1.59303	0.0316177	1.4501	7.47393	7.39612	7.3692	P	P	P	7.52184	7.25893	7.81394	P	P	P	6.99581	6.96447	6.64749	P	P	P	Ccar1	Rattus norvegicus cell division cycle and apoptosis regulator 1 (Ccar1), mRNA [NM_001108535]	361849	TC611614	Rn.92786	29997198	chr20	29997139	-	rn|20q11	ENSRNOT00000000447	NM_001108535	cell division cycle and apoptosis regulator 1	chr20:29997198-29997139	GO:0008380|GO:0005794|GO:0005634|GO:0003676	NM_001108535
A_42_P801679	0.00922872	0.251859	2.55e-05	0.13217	4.53692	4.55058	4.33169	P	P	P	4.85765	5.70536	5.52643	P	P	P	7.20975	7.51216	7.44882	P	P	P	Ctse	Rattus norvegicus cathepsin E (Ctse), mRNA [NM_012938]	25424	TC577041	Rn.92738	44605109	chr13	44605050	+	rn|13q13	ENSRNOT00000048391	NM_012938	cathepsin E	chr13:44605050-44605109	GO:0019886|GO:0016540|GO:0006508|GO:0008233|GO:0004190|GO:0042803|GO:0005768	NM_012938
A_44_P159500	0.00153033	0.446614	0.0008465	0.365816	7.9309	7.89836	8.12142	P	P	P	8.35533	8.34057	8.11654	P	P	P	9.37772	9.63858	9.27195	P	P	P	Mitd1	Rattus norvegicus MIT, microtubule interacting and transport, domain containing 1 (Mitd1), mRNA [NM_001009714]	363219	TC594112	Rn.92704	36830659	chr9	36829959	-	rn|9q21	ENSRNOT00000024959	NM_001009714	MIT, microtubule interacting and transport, domain containing 1	chr9:36830659-36829959	GO:0016020|GO:0031902|GO:0015031|GO:0005768	NM_001009714
A_44_P502793	0.00330505	0.392267	0.00137366	0.366606	6.00153	5.90571	6.32704	P	P	P	6.46697	6.12864	5.91107	P	P	P	7.26495	7.67102	7.64153	P	P	P	Mitd1	Rattus norvegicus MIT, microtubule interacting and transport, domain containing 1 (Mitd1), mRNA [NM_001009714]	363219	TC594112	Rn.92704	36831612	chr9	36831553	-	rn|9q21	ENSRNOT00000024959	NM_001009714	MIT, microtubule interacting and transport, domain containing 1	chr9:36831612-36831553	GO:0016020|GO:0031902|GO:0015031|GO:0005768	NM_001009714
A_44_P449522	0.0413714	1.59211	0.126161	1.29199	10.2743	10.0135	9.751	P	P	P	10.2519	10.6285	10.049	P	P	P	9.73721	9.74752	9.47667	P	P	P	Zfp131	Rattus norvegicus zinc finger protein 131 (Zfp131), mRNA [NM_001100698]	310375	TC598946	Rn.92641	51834742	chr2	51834683	-	rn|2q16	ENSRNOT00000021484	NM_001100698	zinc finger protein 131	chr2:51834742-51834683	GO:0005622|GO:0008270	NM_001100698
A_44_P851720	0.0139418	0.501004	0.513904	0.915491	8.05342	8.17961	7.60062	P	P	P	6.76255	7.1292	7.33719	P	P	P	7.95984	8.0731	8.23178	P	P	P		Rattus norvegicus TL0ACA92YE04 mRNA sequence. [FQ223592]	NA	TC608825	Rn.92548	47077184	chr8	47077125	+	rn|8q22		FQ223592		chr8:47077125-47077184
A_44_P206611	0.0193874	0.352945	0.910746	0.996203	7.4192	7.24447	6.71449	P	P	P	5.13765	6.07367	5.6151	P	P	P	6.97927	7.16439	7.32032	P	P	P		BI277629 UI-R-CY0-bxt-e-06-0-UI.s1 UI-R-CY0 Rattus norvegicus cDNA clone UI-R-CY0-bxt-e-06-0-UI 3', mRNA sequence [BI277629]	NA		Rn.92548	47077504	chr8	47077445	-	rn|8q22		BI277629		chr8:047077504-047077445
A_44_P996233	0.000775457	0.622751	0.00152567	0.600592	8.4928	8.55909	8.72117	P	P	P	8.68781	8.71006	8.53548	P	P	P	9.39139	9.35352	9.24019	P	P	P	Prim1	Rattus norvegicus DNA primase, p49 subunit (Prim1), mRNA [NM_001008768]	246327	TC584256	Rn.92497	1322806	chr7	1322747	+	rn|7q11	ENSRNOT00000065593	NM_001008768	DNA primase, p49 subunit	chr7:1322747-1322806	GO:0006260|GO:0005658|GO:0003896|GO:0006269|GO:0016740	NM_001008768
A_42_P586256	0.000609364	0.639494	0.00125676	0.620456	8.68444	8.6357	8.84314	P	P	P	8.83324	8.77978	8.68545	P	P	P	9.4891	9.42072	9.32268	P	P	P	Prim1	Rattus norvegicus DNA primase, p49 subunit (Prim1), mRNA [NM_001008768]	246327	TC584256	Rn.92497	1321776	chr7	1321717	+	rn|7q11	ENSRNOT00000045511	NM_001008768	DNA primase, p49 subunit	chr7:1321717-1321776	GO:0006260|GO:0005658|GO:0003896|GO:0006269|GO:0016740	NM_001008768
A_44_P242904	0.027588	2.7467	0.082881	1.91837	2.96508	2.51909	2.57742	A	A	A	3.52545	3.25413	2.78189	P	P	P	2.33831	1.50414	1.18665	A	A	A	Grik3	Rattus norvegicus glutamate receptor, ionotropic, kainate 3 (Grik3), transcript variant 2, mRNA [NM_181373]	298521	TC574218	Rn.92477	145057748	chr5	145057689	+	rn|5q36	ENSRNOT00000012065	NM_181373	glutamate receptor, ionotropic, kainate 3	chr5:145057689-145057748	GO:0005515|GO:0030424|GO:0030054|GO:0005886|GO:0001640|GO:0005234|GO:0007268|GO:0045202|GO:0032839|GO:0030425|GO:0043195|GO:0045211|GO:0004970|GO:0042391|GO:0015277|GO:0043204|GO:0004872|GO:0006811|GO:0001664|GO:0051967|GO:0007216|GO:0007215|GO:0005887|GO:0008066|GO:0016021|GO:0005216	NM_181373
A_44_P280887	0.0475976	1.50787	0.659835	1.16454	3.58395	2.82879	3.86437	A	A	A	4.1019	3.8425	3.59318	P	P	P	3.28575	3.17644	3.33796	A	A	A		mucin 6, gastric Gene [Source:MGI Symbol;Acc:MGI:2663233] [ENSRNOT00000026749]	NA	NP541530	Rn.92457	201819580	chr1	201819521	-	rn|1q41	ENSRNOT00000026749	XM_001063115		chr1:201819580-201819521		XM_001063115
A_44_P308898	0.00271155	0.0200741	0.625785	0.9719	7.88584	4.90928	5.93949	P	P	P	1.16808	1.16778	1.18888	A	A	A	6.24266	7.25339	6.76986	P	P	P	Foxi2	Forkhead box protein I2 Fragment (Hepatocyte nuclear factor 3 forkhead homolog 5)(HFH-5) [Source:UniProtKB/Swiss-Prot;Acc:Q63248] [ENSRNOT00000025569]	246073	NP070279	Rn.92429	195037836	chr1	195037777	+	rn|1q41	ENSRNOT00000025569	XM_001056035	forkhead box I2	chr1:195037777-195037836	GO:0043565|GO:0006355|GO:0003700|GO:0005634	XM_001056035
A_44_P1059556	0.0454195	1.92806	0.0390828	1.36157	13.1341	13.0579	13.1531	P	P	P	13.1052	13.772	13.8634	P	P	P	12.5102	12.8572	12.6216	P	P	P	Cyp4a1	Rattus norvegicus cytochrome P450, family 4, subfamily a, polypeptide 1 (Cyp4a1), mRNA [NM_175837]	170544	TC587253	Rn.92401	135915680	chr5	135915621	+	rn|5q36	ENSRNOT00000051385	NM_175837	cytochrome P450, family 4, subfamily a, polypeptide 1	chr5:135915621-135915680	GO:0046456|GO:0008393|GO:0019369|GO:0005792|GO:0008391|GO:0001822|GO:0005783|GO:0018685|GO:0009055|GO:0001890|GO:0046872|GO:0043651|GO:0004497|GO:0016020|GO:0005789|GO:0048252|GO:0055114|GO:0020037	NM_175837
A_44_P102570	0.000176691	1.81289	0.35704	1.07544	5.65279	5.43024	5.69878	P	P	P	6.44044	6.32302	6.28803	P	P	P	5.57356	5.47974	5.42377	P	P	P	Ptcra	Pre T-cell antigen receptor alpha Precursor (pT-alpha)(pTa)(pT-alpha-TCR) [Source:UniProtKB/Swiss-Prot;Acc:P0C6B3] [ENSRNOT00000067894]	116462	NP282304	Rn.92370	10098541	chr9	10098482	+	rn|9q12	ENSRNOT00000067894	XM_001065627	pre T-cell antigen receptor alpha	chr9:10098482-10098541	GO:0005515|GO:0042105|GO:0016020|GO:0070244|GO:0004872|GO:0016021	XM_001065627
A_44_P536370	0.0410443	2.7918	0.260071	1.42407	2.96196	3.05698	3.05522	A	A	A	4.33625	3.92919	3.6384	P	P	P	3.1642	1.79972	2.23465	A	A	A	Msx3	Rattus norvegicus homeo box, msh-like 3 (Msx3), mRNA [NM_053712]	114504	TC645158	Rn.92366	199847482	chr1	199847424	-	rn|1q41	ENSRNOT00000024680	NM_053712	homeo box, msh-like 3	chr1:199847482-199847424		NM_053712
A_43_P16163	0.0222117	2.11085	0.271882	1.17242	4.43026	4.64674	4.65978	P	P	P	5.72457	5.50112	4.96627	P	P	P	4.56453	4.42021	4.02174	P	P	A	Gbx2	Rattus norvegicus gastrulation brain homeobox 2 (Gbx2), mRNA [NM_053708]	114500	NP369724	Rn.92363	89035279	chr9	89035220	-	rn|9q35	ENSRNOT00000026419	NM_053708	gastrulation brain homeobox 2	chr9:89035279-89035220		NM_053708
A_43_P13417	0.0397956	2.94869	0.132415	2.16019	6.53417	7.63733	6.31781	P	P	P	6.7462	7.87422	7.368	P	P	P	5.7429	5.9692	5.80212	P	P	P	Fzd2	Rattus norvegicus frizzled homolog 2 (Drosophila) (Fzd2), mRNA [NM_172035]	64512	TC612883	Rn.92324	91710298	chr10	91710239	+	rn|10q32.1	ENSRNOT00000032944	NM_172035	frizzled homolog 2 (Drosophila)	chr10:91710239-91710298	GO:0042813|GO:0005515|GO:0016020|GO:0004926|GO:0004930|GO:0030855|GO:0007199|GO:0007267|GO:0007275|GO:0016021|GO:0007204|GO:0007223	NM_172035
A_44_P534089	0.00230271	0.117811	0.00730135	0.13825	3.79945	3.1382	4.53035	A	A	P	3.77935	3.75902	3.55949	P	P	P	6.36153	7.08495	6.82726	P	P	P	Ccnb1	Rattus norvegicus cyclin B1 (Ccnb1), mRNA [NM_171991]	25203	TC578441	Rn.9232	31575048	chr2	31574809	-	rn|2q12	ENSRNOT00000025297	NM_171991	cyclin B1	chr2:31575048-31574809	GO:0060045|GO:0005515|GO:0000236|GO:0043148|GO:0046680|GO:0005634|GO:0071445|GO:0001556|GO:0007283|GO:0042246|GO:0031145|GO:0032403|GO:0005829|GO:0071398|GO:0005737|GO:0051726|GO:0071174|GO:0005856|GO:0060623|GO:0071283|GO:0051987|GO:0005815|GO:0019901|GO:0042493|GO:0051437|GO:0071456|GO:0009636|GO:0048565|GO:0009612|GO:0071407|GO:0045931|GO:0035173|GO:0000922|GO:0007049|GO:0033129|GO:0006461|GO:…	NM_171991
A_44_P207549	0.0188804	0.279132	0.00302378	0.252122	3.61226	3.79264	3.64236	A	A	A	3.14567	3.73178	4.36255	A	P	P	5.34469	5.76147	5.86084	P	P	P		AW915718 EST347022 Normalized rat embryo, Bento Soares Rattus sp. cDNA clone RGICZ76 5' end, mRNA sequence [AW915718]	NA		Rn.92304	25733030	chr10	25732971	-	rn|10q12		AW915718		chr10:025733030-025732971
A_44_P355306	0.0367564	2.27262	0.0598888	2.058	4.59891	4.74033	4.90573	P	P	P	4.73471	5.27987	4.57911	P	P	P	3.99212	3.92304	3.04381	A	P	A		AI639488 rx02811s Rat mixed-tissue library Rattus norvegicus cDNA clone rx02811 3', mRNA sequence [AI639488]	NA		Rn.91829	56998139	chr7	56998080	+	rn|7q22		AI639488		chr7:056998080-056998139
A_43_P16885	0.010925	2.18939	0.00120983	2.61319	8.47228	8.51995	8.75659	P	P	P	8.12171	8.58868	8.24763	P	P	P	7.23773	7.24086	7.12619	P	P	P	Mdm2	Rattus norvegicus Mdm2 p53 binding protein homolog (mouse) (Mdm2), mRNA [NM_001108099]	314856	TC636945	Rn.91829	57005835	chr7	57005501	-	rn|7q22	ENSRNOT00000008388	NM_001108099	Mdm2 p53 binding protein homolog (mouse)	chr7:57005835-57005501	GO:0005515|GO:0071157|GO:0004842|GO:0034504|GO:0070301|GO:0045202|GO:0071301|GO:0042220|GO:0042802|GO:0005622|GO:0009743|GO:0042787|GO:0010039|GO:0032026|GO:0071310|GO:0071312|GO:0010843|GO:0009636|GO:0071391|GO:0043278|GO:0000122|GO:0048545|GO:0043234|GO:0045931|GO:0017163|GO:0008270|GO:0005654|GO:0019899|GO:0045472|GO:0016567|GO:0005886|GO:0032436|GO:0005634|GO:0071445|GO:0042975|GO:0046872|GO:…	NM_001108099
A_44_P634946	0.0113428	1.98119	0.0126723	2.42233	9.92755	10.188	10.4517	P	P	P	9.74393	9.84384	10.1288	P	P	P	8.88557	8.96116	8.93779	P	P	P	Mdm2	Rattus norvegicus Mdm2 p53 binding protein homolog (mouse) (Mdm2), mRNA [NM_001108099]	314856	TC624269	Rn.91829	56996939	chr7	56996880	-	rn|7q22	ENSRNOT00000008388	NM_001108099	Mdm2 p53 binding protein homolog (mouse)	chr7:56996939-56996880	GO:0005515|GO:0071157|GO:0004842|GO:0034504|GO:0070301|GO:0045202|GO:0071301|GO:0042220|GO:0042802|GO:0005622|GO:0009743|GO:0042787|GO:0010039|GO:0032026|GO:0071310|GO:0071312|GO:0010843|GO:0009636|GO:0071391|GO:0043278|GO:0000122|GO:0048545|GO:0043234|GO:0045931|GO:0017163|GO:0008270|GO:0005654|GO:0019899|GO:0045472|GO:0016567|GO:0005886|GO:0032436|GO:0005634|GO:0071445|GO:0042975|GO:0046872|GO:…	NM_001108099
A_42_P772136	0.00772447	0.436421	0.0319221	0.575575	4.62824	4.63701	4.50371	P	P	P	4.51251	4.08656	3.90738	P	P	P	5.08643	5.63717	5.3877	P	P	P	Fam60a	Rattus norvegicus family with sequence similarity 60, member A (Fam60a), transcript variant 1, mRNA [NM_001134711]	686611	TC647812	Rn.9154	NA		NA				NM_001134711	family with sequence similarity 60, member A			NM_001134711
A_44_P228932	0.0362411	1.83142	0.0759543	1.4212	5.03273	5.11552	4.64624	P	P	P	5.47198	5.51901	4.85233	P	P	P	4.35739	4.18504	4.7202	P	P	P	Pde4a	Rattus norvegicus phosphodiesterase 4A, cAMP-specific (phosphodiesterase E2 dunce homolog, Drosophila) (Pde4a), mRNA [NM_013101]	25638	NP070449	Rn.91357	20240971	chr8	20240912	+	rn|8q13	ENSRNOT00000061100	NM_013101	phosphodiesterase 4A, cAMP-specific (phosphodiesterase E2 dunce homolog, Drosophila)	chr8:20240912-20240971	GO:0005515|GO:0048471|GO:0004115|GO:0004114|GO:0042493|GO:0005634|GO:0003824|GO:0046872|GO:0005829|GO:0007165|GO:0005737|GO:0016787|GO:0006198	NM_013101
A_44_P311322	0.0328079	0.243237	0.0327529	0.241892	6.65366	6.72881	7.36146	P	P	P	6.46446	6.26942	7.69911	P	P	P	8.63362	8.19759	9.72074	P	P	P	Cyp2b1	Rattus norvegicus cytochrome P450, family 2, subfamily b, polypeptide 1 (Cyp2b1), mRNA [NM_001134844]	24300	TC578033	Rn.91353	81283759	chr1	81283700	+	rn|1q21	ENSRNOT00000047540	NM_001134844	cytochrome P450, family 2, subfamily b, polypeptide 1	chr1:81283700-81283759	GO:0005792|GO:0014070|GO:0032868|GO:0070330|GO:0017144|GO:0005783|GO:0008395|GO:0042493|GO:0009055|GO:0046872|GO:0051592|GO:0016020|GO:0010038|GO:0005789|GO:0010477|GO:0055114|GO:0020037	NM_001134844
A_44_P542390	0.00656739	0.641945	0.0066126	0.700672	7.72489	7.62589	7.77048	P	P	P	7.75409	7.53447	7.43931	P	P	P	8.3596	8.13669	8.15765	P	P	P	Ptprs	Rattus norvegicus protein tyrosine phosphatase, receptor type, S (Ptprs), mRNA [NM_019140]	25529	NP069270	Rn.91202	25359539	chrUn	25359480	+			NM_019140	protein tyrosine phosphatase, receptor type, S	chrUn:25359480-25359539	GO:0005515|GO:0006470|GO:0016787|GO:0016020|GO:0004872|GO:0016021|GO:0007155|GO:0004725	NM_019140
A_44_P554650	0.037583	2.09922	0.231465	1.35004	7.903	8.63362	7.9694	P	P	P	8.89561	9.13828	8.4081	P	P	P	7.72023	7.83064	7.77223	P	P	P		AA892520 EST196323 Normalized rat kidney, Bento Soares Rattus sp. cDNA clone RKIAS43 3' end, mRNA sequence [AA892520]	NA		Rn.9118	90484243	chr10	90484184	+	rn|10q32.1		AA892520		chr10:090484184-090484243
A_42_P785801	0.0261587	1.94548	0.0340807	1.98659	13.4507	13.4654	13.3069	P	P	P	13.3301	13.2166	13.5685	P	P	P	12.5677	12.6312	11.9714	P	P	P	Cyp3a23/3a1	Cytochrome P450 3A1 (EC 1.14.14.1)(CYPIIIA1)(Cytochrome P450-PCN1) [Source:UniProtKB/Swiss-Prot;Acc:P04800] [ENSRNOT00000051244]	25642	TC576500	Rn.91120	9567069	chr12	9567010	-	rn|12p11	ENSRNOT00000051244	D13912	cytochrome P450, family 3, subfamily a, polypeptide 23/polypeptide 1	chr12:9567069-9567010	GO:0034875|GO:0006706|GO:0017144|GO:0030343|GO:0005783|GO:0070989|GO:0050649|GO:0046872|GO:0004497|GO:0005737|GO:0009822|GO:0010038|GO:0070576|GO:0005496|GO:0008202|GO:0046483|GO:0005792|GO:0070330|GO:0005506|GO:0009986|GO:0007584|GO:0042493|GO:0008395|GO:0007568|GO:0009055|GO:0051384|GO:0016098|GO:0042737|GO:0032451|GO:0016020|GO:0019825|GO:0042738|GO:0005789|GO:0016491|GO:0019899|GO:0046686|GO:…
A_44_P1010087	0.0336818	0.500152	0.0871733	0.563853	4.64328	3.85621	4.86999	P	P	P	3.83736	4.38636	4.68616	P	P	P	5.65433	5.04648	5.26506	P	P	P	Hoxa2	Rattus norvegicus homeo box A2 (Hoxa2), mRNA [NM_012581]	24452	TC577991	Rn.91077	80462816	chr4	80462757	-	rn|4q24	ENSRNOT00000008023	NM_012581	homeo box A2	chr4:80462816-80462757	GO:0006355|GO:0003700|GO:0007379|GO:0001709|GO:0021658|GO:0021568|GO:0048704|GO:0005634|GO:0048703|GO:0000122|GO:0009953|GO:0009952|GO:0043565|GO:0008045|GO:0045665|GO:0002076|GO:0045944|GO:0035284|GO:0042474	NM_012581
A_43_P12148	0.0052269	0.231421	0.00539192	0.220096	3.44301	3.33248	3.09806	A	A	A	3.88189	2.95458	3.09352	P	A	P	5.03909	5.8663	5.42192	P	P	P	Top2a	Rattus norvegicus topoisomerase (DNA) II alpha (Top2a), mRNA [NM_022183]	360243	TC573687	Rn.90996	87773659	chr10	87773477	-	rn|10q31	ENSRNOT00000050725	NM_022183	topoisomerase (DNA) II alpha	chr10:87773659-87773477	GO:0005515|GO:0043130|GO:0000793|GO:0042826|GO:0030261|GO:0005634|GO:0042803|GO:0021707|GO:0005737|GO:0007059|GO:0040016|GO:0021702|GO:0045944|GO:0008144|GO:0005080|GO:0045070|GO:0008094|GO:0071107|GO:0003916|GO:0043065|GO:0003918|GO:0009330|GO:0046982|GO:0005694|GO:0005814|GO:0042493|GO:0007568|GO:0005730|GO:0000228|GO:0008022|GO:0005524|GO:0003677|GO:0006974|GO:0045870|GO:0043565|GO:0043234|GO:…	NM_022183
A_44_P531770	0.00171989	0.0905217	0.00594429	0.0455922	1.58239	1.52841	1.546	A	A	A	1.96236	2.66494	2.85438	A	A	P	5.25189	6.23166	6.31742	P	P	P	Top2a	Rattus norvegicus topoisomerase (DNA) II alpha (Top2a), mRNA [NM_022183]	360243	TC615782	Rn.90996	87771518	chr10	87771459	-	rn|10q31	ENSRNOT00000050725	NM_022183	topoisomerase (DNA) II alpha	chr10:87771518-87771459	GO:0005515|GO:0043130|GO:0000793|GO:0042826|GO:0030261|GO:0005634|GO:0042803|GO:0021707|GO:0005737|GO:0007059|GO:0040016|GO:0021702|GO:0045944|GO:0008144|GO:0005080|GO:0045070|GO:0008094|GO:0071107|GO:0003916|GO:0043065|GO:0003918|GO:0009330|GO:0046982|GO:0005694|GO:0005814|GO:0042493|GO:0007568|GO:0005730|GO:0000228|GO:0008022|GO:0005524|GO:0003677|GO:0006974|GO:0045870|GO:0043565|GO:0043234|GO:…	NM_022183
A_44_P139697	0.00456246	3.17821	0.0141197	2.70308	7.51635	7.55185	7.51007	P	P	P	7.67498	7.68302	7.909	P	P	P	6.41472	5.82701	5.96586	P	P	P	Atp2b2	Rattus norvegicus ATPase, Ca++ transporting, plasma membrane 2 (Atp2b2), mRNA [NM_012508]	24215	TC607128	Rn.90982	149655759	chr4	149655700	-	rn|4q42	ENSRNOT00000043476	NM_012508	ATPase, Ca++ transporting, plasma membrane 2	chr4:149655759-149655700	GO:0005515|GO:0005516|GO:0005886|GO:0007605|GO:0003824|GO:0046872|GO:0030425|GO:0006754|GO:0005737|GO:0016324|GO:0000166|GO:0030182|GO:0043025|GO:0006816|GO:0016820|GO:0006812|GO:0003407|GO:0005509|GO:0008022|GO:0030165|GO:0005524|GO:0005388|GO:0016020|GO:0016787|GO:0007420|GO:0035254|GO:0008152|GO:0045121|GO:0016021	NM_012508
A_44_P113157	0.00568592	2.93439	0.0112763	2.43206	5.48988	5.58269	5.40865	P	P	P	5.47834	5.56219	6.1592	P	P	P	4.51745	3.94734	4.11433	P	P	P		AA955388 UI-R-A1-ex-a-11-0-UI.s1 UI-R-A1 Rattus norvegicus cDNA clone UI-R-A1-ex-a-11-0-UI 3' similar to gi [AA955388]	NA		Rn.90982	149657096	chr4	149657037	+	rn|4q42		AA955388		chr4:149657037-149657096
A_44_P535337	0.0163637	2.21552	0.0137543	2.17329	7.96361	8.25686	8.18457	P	P	P	8.27411	8.17504	8.04606	P	P	P	7.15491	7.21355	6.62277	P	P	P	Atp2b2	Rattus norvegicus ATPase, Ca++ transporting, plasma membrane 2 (Atp2b2), mRNA [NM_012508]	24215	TC594569	Rn.90982	149657888	chr4	149657829	-	rn|4q42	ENSRNOT00000043476	NM_012508	ATPase, Ca++ transporting, plasma membrane 2	chr4:149657888-149657829	GO:0005515|GO:0005516|GO:0005886|GO:0007605|GO:0003824|GO:0046872|GO:0030425|GO:0006754|GO:0005737|GO:0016324|GO:0000166|GO:0030182|GO:0043025|GO:0006816|GO:0016820|GO:0006812|GO:0003407|GO:0005509|GO:0008022|GO:0030165|GO:0005524|GO:0005388|GO:0016020|GO:0016787|GO:0007420|GO:0035254|GO:0008152|GO:0045121|GO:0016021	NM_012508
A_43_P17202	0.00597067	1.69783	0.00334694	1.62319	7.16549	7.05425	6.88663	P	P	P	7.06433	7.1036	7.14546	P	P	P	6.4871	6.28803	6.23597	P	P	P	Mdm4	Rattus norvegicus Mdm4 p53 binding protein homolog (mouse) (Mdm4), mRNA [NM_001012026]	304798	TC610895	Rn.90967	45896425	chr13	45896366	-	rn|13q13	ENSRNOT00000012984	NM_001012026	Mdm4 p53 binding protein homolog (mouse)	chr13:45896425-45896366	GO:0005515|GO:0008284|GO:0042177|GO:0008283|GO:0050821|GO:0006915|GO:0005634|GO:0000122|GO:0005575|GO:0046872|GO:0045023|GO:0005622|GO:0003674|GO:0008150|GO:0006461|GO:0008270|GO:0019899	NM_001012026
A_44_P553765	0.0177264	0.516657	0.438841	0.913916	7.52275	7.40464	7.44291	P	P	P	6.81758	6.78254	6.23318	P	P	P	7.54889	7.37693	7.80432	P	P	P	Phf17	Rattus norvegicus PHD finger protein 17 (Phf17), mRNA [NM_001107670]	310352	TC592193	Rn.90858	128552726	chr2	128552667	+	rn|2q26	ENSRNOT00000018872	NM_001107670	PHD finger protein 17	chr2:128552667-128552726	GO:0043981|GO:0005515|GO:0043983|GO:0005737|GO:0043982|GO:0043966|GO:0043984|GO:0000123|GO:0008270|GO:0005634|GO:0046872	NM_001107670
A_44_P341910	0.001471	0.102184	0.00314877	0.0904765	1.35494	1.31281	1.45822	A	A	A	1.62789	1.35845	1.65219	A	A	A	5.16296	4.40097	4.86516	P	P	P	Retnlg	Rattus norvegicus resistin-like gamma (Retnlg), mRNA [NM_181625]	288135	TC624590	Rn.90340	53175885	chr11	53175372	-	rn|11q21		NM_181625	resistin-like gamma	chr11:53175885-53175372	GO:0005179|GO:0005576|GO:0005125	NM_181625
A_44_P455271	0.0358792	0.582479	0.157276	0.632662	6.08826	7.05332	7.14694	P	P	P	6.65086	7.04185	6.3777	P	P	P	7.66877	7.43931	7.36146	P	P	P		BF556006 UI-R-A1-dz-b-02-0-UI.r1 UI-R-A1 Rattus norvegicus cDNA clone UI-R-A1-dz-b-02-0-UI 5', mRNA sequence [BF556006]	NA	TC596330	Rn.9033	173609637	chr4	173609578	+	rn|4q43		BF556006		chr4:173609578-173609637
A_44_P492879	0.0169547	0.591522	0.00359909	0.697277	5.45961	5.27065	5.43092	P	P	P	5.35971	4.89257	5.16633	P	P	P	5.8189	6.02435	5.87779	P	P	P		Rattus norvegicus similar to mEnx-1 (LOC312299), mRNA [XM_231705]	NA		Rn.9027	NA		NA				XM_231705
A_44_P448051	0.0104137	2.36455	0.0587146	2.20703	7.58316	7.768	6.77719	P	P	P	7.66149	7.73627	7.13743	P	P	P	6.09945	6.42188	6.34054	P	P	P	Vpreb3	Rattus norvegicus pre-B lymphocyte 3 (Vpreb3), mRNA [NM_001108930]	365550	TC633108	Rn.90200	13116558	chr20	13116499	-	rn|20p12	ENSRNOT00000032290	NM_001108930	pre-B lymphocyte 3	chr20:13116558-13116499		NM_001108930
A_44_P714409	0.00193999	1.79247	0.0197771	1.46045	9.22823	9.59665	9.32155	P	P	P	9.69234	9.76394	9.59785	P	P	P	8.96501	8.86293	8.69206	P	P	P	Sfrs3	Rattus norvegicus splicing factor, arginine/serine-rich 3 (Sfrs3), mRNA [NM_001047907]	361814	TC585029	Rn.9002	7324556	chr20	7324497	+	rn|20p12	ENSRNOT00000000627	NM_001047907	splicing factor, arginine/serine-rich 3	chr20:7324497-7324556	GO:0008380|GO:0005515|GO:0000166|GO:0003676	NM_001047907
A_44_P1025013	0.00251747	1.87821	0.00750199	1.58482	9.99075	10.1555	10.3068	P	P	P	10.4594	10.5074	10.2229	P	P	P	9.5435	9.53428	9.39494	P	P	P	Sfrs3	Rattus norvegicus splicing factor, arginine/serine-rich 3 (Sfrs3), mRNA [NM_001047907]	361814	TC643843	Rn.9002	7321649	chr20	7320150	+	rn|20p12	ENSRNOT00000047923	NM_001047907	splicing factor, arginine/serine-rich 3	chr20:7320150-7321649	GO:0008380|GO:0005515|GO:0000166|GO:0003676	NM_001047907
A_44_P488355	0.00443073	0.596723	0.0111548	0.79992	9.31676	9.16362	9.33448	P	P	P	8.89369	8.9533	8.69282	P	P	P	9.53083	9.60295	9.65083	P	P	P	Slc2a2	Rattus norvegicus solute carrier family 2 (facilitated glucose transporter), member 2 (Slc2a2), mRNA [NM_012879]	25351	TC575319	Rn.89295	116046168	chr2	116046109	+	rn|2q24	ENSRNOT00000015866	NM_012879	solute carrier family 2 (facilitated glucose transporter), member 2	chr2:116046109-116046168	GO:0005215|GO:0005886|GO:0005158|GO:0007587|GO:0008643|GO:0031526|GO:0055085|GO:0070837|GO:0055056|GO:0005829|GO:0005903|GO:0016323|GO:0015755|GO:0005737|GO:0015758|GO:0016020|GO:0022891|GO:0033300|GO:0016021|GO:0005355|GO:0005768	NM_012879
A_44_P435604	0.0349762	2.58849	0.221143	1.3467	11.2871	10.7887	10.516	P	P	P	11.1455	12.1874	11.9973	P	P	P	10.5038	10.7088	10.1431	P	P	P	Atp1b1	Rattus norvegicus ATPase, Na+/K+ transporting, beta 1 polypeptide (Atp1b1), mRNA [NM_013113]	25650	TC640442	Rn.8925	80214201	chr13	80214142	-	rn|13q23	ENSRNOT00000003932	NM_013113	ATPase, Na+/K+ transporting, beta 1 polypeptide	chr13:80214201-80214142	GO:0005515|GO:0001666|GO:0005886|GO:0005890|GO:0030001|GO:0016323|GO:0006754|GO:0016324|GO:0005901|GO:0016021|GO:0006814|GO:0006813|GO:0005391|GO:0006811	NM_013113
A_44_P177736	0.0483719	0.57907	0.158501	0.719168	4.34419	4.84176	4.49778	P	P	P	3.94856	4.52945	4.25562	P	P	P	5.40704	4.97922	4.67568	P	P	P	Syne1	Rattus norvegicus spectrin repeat containing, nuclear envelope 1 (Syne1), mRNA [NM_001029909]	499010	NP1090177	Rn.89150	36105788	chr1	36105729	-	rn|1p11	ENSRNOT00000025795	NM_001029909	spectrin repeat containing, nuclear envelope 1	chr1:36105788-36105729	GO:0005515|GO:0048471|GO:0005794|GO:0090292|GO:0005819|GO:0030496|GO:0034993|GO:0003779|GO:0090286|GO:0005635|GO:0030017|GO:0048814|GO:0042692|GO:0043197|GO:0005198|GO:0007420|GO:0045211|GO:0048260|GO:0007030|GO:0009416|GO:0016021|GO:0005521	NM_001029909
A_44_P395764	0.0454444	2.09556	0.0392086	1.65619	3.42581	4.02402	3.90688	A	P	P	4.27176	4.45103	3.58168	P	P	P	2.91239	3.03161	3.27243	A	A	A	Pcsk2	Rattus norvegicus proprotein convertase subtilisin/kexin type 2 (Pcsk2), mRNA [NM_012746]	25121	TC575528	Rn.89052	132225240	chr3	132214575	+	rn|3q41	ENSRNOT00000007249	NM_012746	proprotein convertase subtilisin/kexin type 2	chr3:132214575-132225240	GO:0005515|GO:0030133|GO:0016540|GO:0004252|GO:0005625|GO:0031410|GO:0032403|GO:0005615|GO:0007399|GO:0034230|GO:0034231|GO:0016020|GO:0016486|GO:0006508|GO:0008233|GO:0030070|GO:0030141	NM_012746
A_44_P395757	0.0338161	2.3479	0.423157	1.20855	3.30257	2.70629	3.02522	A	A	A	3.9879	3.49196	4.36081	P	P	P	2.63904	3.23772	2.21359	A	A	A	Grm4	Rattus norvegicus glutamate receptor, metabotropic 4 (Grm4), mRNA [NM_022666]	24417	NP069127	Rn.89046	5627994	chr20	5627935	-	rn|20p12	ENSRNOT00000066115	NM_022666	glutamate receptor, metabotropic 4	chr20:5627994-5627935	GO:0043066|GO:0008285|GO:0005886|GO:0004930|GO:0014051|GO:0035249|GO:0007268|GO:0007196|GO:0031410|GO:0007194|GO:0031175|GO:0005622|GO:0000187|GO:0043198|GO:0005887|GO:0043195|GO:0050805|GO:0004872|GO:0007612|GO:0016021|GO:0043526|GO:0043410|GO:0051932|GO:0048787	NM_022666
A_44_P1052504	0.0144416	0.510643	0.0601874	0.694387	5.12931	5.64852	5.52933	P	P	P	5.28044	4.9484	4.74679	P	P	P	6.04854	6.02418	5.85507	P	P	P	Rhot2	Rattus norvegicus ras homolog gene family, member T2 (Rhot2), nuclear gene encoding mitochondrial protein, mRNA [NM_181823]	287156	TC575041	Rn.8882	15110127	chr10	15110068	-	rn|10q12	ENSRNOT00000027121	NM_181823	ras homolog gene family, member T2	chr10:15110127-15110068	GO:0005515|GO:0019725|GO:0007264|GO:0005509|GO:0006915|GO:0005741|GO:0005525|GO:0005622|GO:0005739|GO:0047497|GO:0000166|GO:0016020|GO:0016787|GO:0031307|GO:0016021	NM_181823
A_43_P12090	0.0331477	0.504905	0.00984843	0.52115	7.76439	7.52453	7.94326	P	P	P	7.9224	7.8412	7.28148	P	P	P	8.65178	8.65327	8.77467	P	P	P	Pold1	Rattus norvegicus polymerase (DNA directed), delta 1, catalytic subunit (Pold1), mRNA [NM_021662]	59294	TC574430	Rn.88690	95011164	chr1	95010792	-	rn|1q22	ENSRNOT00000026797	NM_021662	polymerase (DNA directed), delta 1, catalytic subunit	chr1:95011164-95010792	GO:0043625|GO:0005515|GO:0008408|GO:0003887|GO:0016779|GO:0005634|GO:0005575|GO:0003677|GO:0046872|GO:0000084|GO:0006260|GO:0006261|GO:0006139|GO:0045004|GO:0016787|GO:0000166|GO:0003682|GO:0000731|GO:0006287|GO:0006297|GO:0005654|GO:0016740	NM_021662
A_43_P15937	0.00238586	3.40396	0.0236511	2.68639	10.155	10.2528	9.30628	P	P	P	10.5504	10.0601	10.2594	P	P	P	8.42291	8.23066	8.87859	P	P	P	Acsm3	Rattus norvegicus acyl-CoA synthetase medium-chain family member 3 (Acsm3), mRNA [NM_033231]	24763	TC575347	Rn.88644	178074974	chr1	178074915	+	rn|1q35	ENSRNOT00000020039	NM_033231	acyl-CoA synthetase medium-chain family member 3	chr1:178074915-178074974	GO:0006629|GO:0016874|GO:0005575|GO:0003824|GO:0005524|GO:0047760|GO:0046872|GO:0005739|GO:0003674|GO:0008150|GO:0000166|GO:0005759|GO:0008152|GO:0006631	NM_033231
A_44_P547526	0.0224437	0.659613	0.531136	0.919877	5.04452	5.11394	5.44208	P	P	P	4.74106	4.54174	4.88931	P	P	P	5.27329	5.13039	5.55715	P	P	P		AA957202 UI-R-E1-ft-f-03-0-UI.s1 UI-R-E1 Rattus norvegicus cDNA clone UI-R-E1-ft-f-03-0-UI 3', mRNA sequence [AA957202]	NA		Rn.88597	83711191	chr10	83711132	+	rn|10q31		AA957202		chr10:083711132-083711191
A_44_P473074	0.020197	0.645816	0.18465	0.814281	5.40624	4.94696	5.10256	P	P	P	4.72414	5.02002	4.72623	P	P	P	5.20343	5.51221	5.63425	P	P	P	Slc22a5	Rattus norvegicus solute carrier family 22 (organic cation/carnitine transporter), member 5 (Slc22a5), mRNA [NM_019269]	29726	TC574734	Rn.8844	39316756	chr10	39316697	-	rn|10q22	ENSRNOT00000011340	NM_019269	solute carrier family 22 (organic cation/carnitine transporter), member 5	chr10:39316756-39316697	GO:0005515|GO:0005215|GO:0060731|GO:0015075|GO:0052106|GO:0015697|GO:0070715|GO:0031526|GO:0030165|GO:0055085|GO:0005524|GO:0015651|GO:0016323|GO:0016324|GO:0000166|GO:0016020|GO:0042891|GO:0016021|GO:0042895|GO:0006814|GO:0015879|GO:0015226|GO:0006811|GO:0015293	NM_019269
A_44_P364482	0.0399739	2.13567	0.0653262	1.68238	3.47294	3.13122	3.54107	A	A	A	3.6751	4.1549	3.23374	P	P	P	2.87813	2.81362	2.11914	A	A	A		BF291161 EST455752 Rat Gene Index, normalized rat, Rattus norvegicus cDNA Rattus norvegicus cDNA clone RGIIJ51 3' sequence, mRNA sequence [BF291161]	NA	TC593486	Rn.88168	134864714	chr3	134864655	+	rn|3q41		BF291161		chr3:134864655-134864714
A_44_P522524	0.0039991	6.38102	0.0660418	3.0071	8.49928	6.99472	7.60522	P	P	P	8.29236	9.14295	9.16195	P	P	P	6.11546	6.51708	6.05695	P	P	P	Nr4a2	Rattus norvegicus nuclear receptor subfamily 4, group A, member 2 (Nr4a2), mRNA [NM_019328]	54278	NP1481770	Rn.88129	38867080	chr3	38867021	-	rn|3q12	ENSRNOT00000041394	NM_019328	nuclear receptor subfamily 4, group A, member 2	chr3:38867080-38867021	GO:0005515|GO:0008344|GO:0003700|GO:0016563|GO:0003707|GO:0016265|GO:0005634|GO:0009791|GO:0046872|GO:0042053|GO:0042416|GO:0051789|GO:0043576|GO:0043524|GO:0005737|GO:0010035|GO:0045944|GO:0031668|GO:0004879|GO:0001666|GO:0046982|GO:0006357|GO:0042551|GO:0021953|GO:0021952|GO:0043085|GO:0003677|GO:0007399|GO:0043565|GO:0001975|GO:0008270|GO:0017085|GO:0001764	NM_019328
A_42_P619056	0.0249296	0.467484	0.0626927	0.602949	8.09128	8.03211	8.50942	P	P	P	7.62698	8.27284	7.56961	P	P	P	8.82521	9.34123	8.60225	P	P	P	Gcnt2	Rattus norvegicus glucosaminyl (N-acetyl) transferase 2, I-branching enzyme (Gcnt2), mRNA [NM_001001511]	306860	NP956489	Rn.8807	29727037	chr17	29726978	-	rn|17p12	ENSRNOT00000035448	NM_001001511	glucosaminyl (N-acetyl) transferase 2, I-branching enzyme	chr17:29727037-29726978	GO:0008375|GO:0008150|GO:0003674|GO:0016020|GO:0016021|GO:0005575|GO:0016740	NM_001001511
A_44_P833822	0.00310895	0.594043	0.00223883	0.566643	5.54123	5.37491	5.60938	P	P	P	5.56194	5.45344	5.7127	P	P	P	6.37964	6.44348	6.15523	P	P	P		AW915845 EST347149 Rat gene index, normalized rat, norvegicus, Bento Soares Rattus norvegicus cDNA clone RGIDB44 5' end, mRNA sequence [AW915845]	NA		Rn.8789	112498130	chr8	112498071	-	rn|8q32		AW915845		chr8:112498130-112498071
A_44_P212887	0.0177698	0.569854	0.0102836	0.516696	4.00822	3.90331	3.59616	P	P	A	3.78347	4.04691	4.1117	P	P	P	4.55175	5.08086	4.71197	P	P	P	Mapkapk3	Rattus norvegicus mitogen-activated protein kinase-activated protein kinase 3 (Mapkapk3), mRNA [NM_001012127]	315994	TC637500	Rn.8789	112500040	chr8	112499729	-	rn|8q32	ENSRNOT00000020065	NM_001012127	mitogen-activated protein kinase-activated protein kinase 3	chr8:112500040-112499729	GO:0005737|GO:0000166|GO:0004674|GO:0007265|GO:0006468|GO:0005634|GO:0005524|GO:0016740|GO:0005829	NM_001012127
A_42_P470649	0.0172857	0.500272	0.033318	0.616598	11.8226	11.9706	12.3939	P	P	P	11.7619	11.4102	12.0926	P	P	P	12.81	12.5302	12.9686	P	P	P	Dio1	Rattus norvegicus deiodinase, iodothyronine, type I (Dio1), mRNA [NM_021653]	25430	TC576328	Rn.87549	128385972	chr5	128385913	-	rn|5q34	ENSRNOT00000044375	NM_021653	deiodinase, iodothyronine, type I	chr5:128385972-128385913	GO:0016020|GO:0005886|GO:0005783|GO:0005789|GO:0042446|GO:0004800|GO:0016021|GO:0006091|GO:0055114	NM_021653
A_44_P194274	0.0379921	0.493642	0.116153	0.649934	8.70965	8.61153	9.46013	P	P	P	8.81018	8.01966	8.78673	P	P	P	9.43994	9.48996	9.83934	P	P	P	Dio1	Rattus norvegicus deiodinase, iodothyronine, type I (Dio1), mRNA [NM_021653]	25430	TC635076	Rn.87549	128403820	chr5	128403761	-	rn|5q34	ENSRNOT00000044375	NM_021653	deiodinase, iodothyronine, type I	chr5:128403820-128403761	GO:0016020|GO:0005886|GO:0005783|GO:0005789|GO:0042446|GO:0004800|GO:0016021|GO:0006091|GO:0055114	NM_021653
A_42_P611223	0.0093211	1.50131	0.037527	1.49778	10.2134	9.81914	9.97022	P	P	P	10.0882	9.89678	10.0485	P	P	P	9.43396	9.41597	9.4319	P	P	P	Cgrrf1	Rattus norvegicus cell growth regulator with ring finger domain 1 (Cgrrf1), mRNA [NM_053899]	116679	TC583624	Rn.87514	22703053	chr15	22697653	+	rn|15p14	ENSRNOT00000013912	NM_053899	cell growth regulator with ring finger domain 1	chr15:22697653-22703053	GO:0005515|GO:0030308|GO:0007049|GO:0008270|GO:0007050|GO:0046872	NM_053899
A_44_P335079	0.0437997	0.608726	0.496127	0.849052	5.10546	4.67681	5.86318	P	P	P	4.68616	4.56742	5.14156	P	P	P	5.20883	5.81086	5.527	P	P	P	Tff3	Rattus norvegicus trefoil factor 3, intestinal (Tff3), mRNA [NM_013042]	25563	TC609409	Rn.87477	9471970	chr20	9471911	-	rn|20p12	ENSRNOT00000001535	NM_013042	trefoil factor 3, intestinal	chr20:009471970-009471911	GO:0042060|GO:0005578|GO:0043434|GO:0005576|GO:0030141|GO:0032579	NM_013042
A_43_P21313	0.0415116	2.56178	0.0146135	1.35427	7.19307	6.98502	7.06082	P	P	P	7.45359	7.87539	8.48735	P	P	P	6.49741	6.64392	6.77904	P	P	P	Nedd9	Rattus norvegicus neural precursor cell expressed, developmentally down-regulated 9 (Nedd9), mRNA [NM_001011922]	291044	TC573942	Rn.8730	29352466	chr17	29352407	+	rn|17p12	ENSRNOT00000067374	NM_001011922	neural precursor cell expressed, developmentally down-regulated 9	chr17:29352407-29352466	GO:0005515	NM_001011922
A_44_P121351	0.0181583	2.05971	0.0357974	1.20045	3.70131	3.90086	3.89309	A	P	A	4.91202	4.36645	4.50499	P	P	P	3.52905	3.66423	3.51521	A	A	A	Drd2	Rattus norvegicus dopamine receptor D2 (Drd2), mRNA [NM_012547]	24318	TC642479	Rn.87299	52706592	chr8	52706533	+	rn|8q23	ENSRNOT00000011259	NM_012547	dopamine receptor D2	chr8:52706533-52706592	GO:0005515|GO:0007608|GO:0001659|GO:0007409|GO:0042220|GO:0031223|GO:0019861|GO:0010039|GO:0030672|GO:0030534|GO:0009416|GO:0016055|GO:0008306|GO:0030336|GO:0007616|GO:0004930|GO:0035240|GO:0009636|GO:0014069|GO:0007212|GO:0030432|GO:0007416|GO:0032922|GO:0002031|GO:0007270|GO:0007186|GO:0002027|GO:0005887|GO:0032228|GO:0008542|GO:0002028|GO:0001591|GO:0007188|GO:0034776|GO:0021984|GO:0030424|GO:…	NM_012547
A_42_P723437	0.00590331	1.88694	0.00116066	1.90982	10.6469	10.4155	10.542	P	P	P	10.3215	10.6117	10.6094	P	P	P	9.67225	9.56671	9.57184	P	P	P	Thyn1	Rattus norvegicus thymocyte nuclear protein 1 (Thyn1), mRNA [NM_001007661]	300470	TC589172	Rn.87291	226530	chr8_random	226471	+			NM_001007661	thymocyte nuclear protein 1	chr8_random:226471-226530	GO:0005634	NM_001007661
A_42_P468231	0.00601739	2.46395	0.905732	1.03139	3.75186	4.46981	3.96588	A	P	A	5.48724	5.46156	5.06732	P	P	P	3.68088	4.31437	4.08543	A	P	A	Cpne9	Rattus norvegicus copine family member IX (Cpne9), mRNA [NM_001024982]	297516	TC576694	Rn.87286	149189052	chr4	149188993	+	rn|4q42	ENSRNOT00000067396	NM_001024982	copine family member IX	chr4:149188993-149189052		NM_001024982
A_44_P182008	0.00963132	0.579339	0.115208	0.707493	9.90527	9.83232	10.4647	P	P	P	9.79841	9.63188	9.97301	P	P	P	10.5474	10.6537	10.5828	P	P	P		AA998545 UI-R-C0-ic-g-08-0-UI.s1 UI-R-C0 Rattus norvegicus cDNA clone UI-R-C0-ic-g-08-0-UI 3', mRNA sequence [AA998545]	NA		Rn.87212	13225200	chr20	13225141	-	rn|20p12		AA998545		chr20:013225200-013225141
A_44_P547801	0.0451825	0.546336	0.115311	0.749293	11.4051	11.2084	11.7822	P	P	P	10.9332	10.6732	11.3893	P	P	P	11.9742	11.8966	11.8303	P	P	P	Gstt2	Rattus norvegicus glutathione S-transferase, theta 2 (Gstt2), mRNA [NM_012796]	29487	TC579233	Rn.87212	13225348	chr20	13225289	+	rn|20p12	ENSRNOT00000037656	NM_012796	glutathione S-transferase, theta 2	chr20:13225289-13225348	GO:0005737|GO:0006749|GO:0005634|GO:0004364|GO:0016740|GO:0005829	NM_012796
A_44_P171506	0.0212744	0.578296	0.00582673	0.662601	11.0455	11.0225	11.2339	P	P	P	11.0324	11.0685	10.5699	P	P	P	11.5712	11.6559	11.8512	P	P	P	Trim14	Rattus norvegicus tripartite motif-containing 14 (Trim14), mRNA [NM_001107934]	313236	TC610972	Rn.8719	63094410	chr5	63094351	-	rn|5q22	ENSRNOT00000011817	NM_001107934	tripartite motif-containing 14	chr5:63094410-63094351	GO:0005622|GO:0008150|GO:0003674|GO:0008270|GO:0005575	NM_001107934
A_44_P302458	0.039518	0.561987	0.115351	0.770585	6.78794	6.61626	7.14489	P	P	P	6.68499	6.4559	6.01508	P	P	P	7.18214	7.1791	7.35955	P	P	P	Trim14	Rattus norvegicus tripartite motif-containing 14 (Trim14), mRNA [NM_001107934]	313236		Rn.8719	63118288	chr5	63104990	-	rn|5q22	ENSRNOT00000066001	NM_001107934	tripartite motif-containing 14	chr5:63118288-63104990	GO:0005622|GO:0008150|GO:0003674|GO:0008270|GO:0005575	NM_001107934
A_44_P712688	0.000263221	0.615394	0.0220957	0.809327	9.6815	9.80391	9.8853	P	P	P	9.46748	9.33667	9.38515	P	P	P	10.047	10.1238	10.1215	P	P	P	Trim14	Rattus norvegicus tripartite motif-containing 14 (Trim14), mRNA [NM_001107934]	313236		Rn.8719	63093590	chr5	63093531	-	rn|5q22	ENSRNOT00000011817	NM_001107934	tripartite motif-containing 14	chr5:63093590-63093531	GO:0005622|GO:0008150|GO:0003674|GO:0008270|GO:0005575	NM_001107934
A_44_P381686	0.0466586	2.92337	0.165734	0.6562	1.40619	2.42263	2.3133	A	A	A	4.07492	4.84485	3.61409	P	P	P	2.81539	2.81311	2.51514	A	A	A	Dbh	Rattus norvegicus dopamine beta-hydroxylase (dopamine beta-monooxygenase) (Dbh), mRNA [NM_013158]	25699	TC575909	Rn.87166	6068253	chr3	6068194	+	rn|3p12	ENSRNOT00000061201	NM_013158	dopamine beta-hydroxylase (dopamine beta-monooxygenase)	chr3:6068194-6068253	GO:0030424|GO:0006548|GO:0007268|GO:0046333|GO:0050900|GO:0001816|GO:0046872|GO:0042596|GO:0004500|GO:0004497|GO:0045907|GO:0042127|GO:0007626|GO:0007613|GO:0002443|GO:0030658|GO:0034466|GO:0042711|GO:0031418|GO:0005507|GO:0009987|GO:0042981|GO:0042593|GO:0001975|GO:0042584|GO:0016020|GO:0048149|GO:0006584|GO:0001974|GO:0008542|GO:0042421|GO:0016023|GO:0042420|GO:0048265|GO:0016021|GO:0055114|GO:…	NM_013158
A_42_P584734	0.0337689	0.372521	0.141988	0.597337	5.64016	5.27477	4.63214	P	P	P	4.12069	4.11405	5.16984	P	P	P	5.83196	5.49334	6.45625	P	P	P	Gdf10	Rattus norvegicus growth differentiation factor 10 (Gdf10), mRNA [NM_024375]	79216	TC575598	Rn.8707	9570544	chr16	9570485	+	rn|16p16	ENSRNOT00000027380	NM_024375	growth differentiation factor 10	chr16:9570485-9570544	GO:0045669|GO:0030278|GO:0042698|GO:0021549|GO:0005576|GO:0040007|GO:0008083|GO:0005615|GO:0005125|GO:0071559|GO:0001649	NM_024375
A_43_P12832	0.011249	1.85012	0.316637	1.24951	5.54207	6.13177	6.23523	P	P	P	6.33173	6.70826	6.63299	P	P	P	5.43257	5.60353	5.9516	P	P	P	Nol3	Rattus norvegicus nucleolar protein 3 (apoptosis repressor with CARD domain) (Nol3), mRNA [NM_053516]	85383	TC578162	Rn.86956	35096000	chr19	35095941	+	rn|19q11		NM_053516	nucleolar protein 3 (apoptosis repressor with CARD domain)	chr19:35095941-35096000	GO:0008380|GO:0006397|GO:0005739|GO:0005622|GO:0005515|GO:0001666|GO:0016528|GO:0005730|GO:0042981|GO:0005634|GO:0042802	NM_053516
A_44_P454580	0.0490948	4.06168	0.387678	1.86666	3.6665	1.43537	3.09885	A	A	A	4.96079	3.42621	3.35955	P	P	P	1.42966	2.88599	1.46205	A	A	A	Uspl1	Rattus norvegicus ubiquitin specific peptidase like 1 (Uspl1), mRNA [NM_001105906]	288447	TC622160	Rn.86346	6338295	chr12	6338236	-	rn|12p11	ENSRNOT00000001210	NM_001105906	ubiquitin specific peptidase like 1	chr12:6338295-6338236	GO:0006511|GO:0004221	NM_001105906
A_44_P354415	0.0368165	2.96918	0.367203	0.676152	3.87078	4.63127	4.40121	A	P	P	5.95374	6.62053	6.72083	P	P	P	3.98124	5.30108	5.10095	A	P	P	Trem1	Rattus norvegicus triggering receptor expressed on myeloid cells 1 (Trem1), mRNA [NM_001106885]	301229		Rn.86337	8185883	chr9	8185824	-	rn|9q12	ENSRNOT00000049193	NM_001106885	triggering receptor expressed on myeloid cells 1	chr9:8185883-8185824	GO:0005886|GO:0004872	NM_001106885
A_44_P324806	0.000525466	3.00137	0.0223473	1.86608	7.05158	6.42066	6.72524	P	P	P	7.59616	7.21165	7.48867	P	P	P	6.02435	5.84019	5.68137	P	P	P		AI103119 EST212408 Normalized rat embryo, Bento Soares Rattus sp. cDNA clone REMBX47 3' end, mRNA sequence [AI103119]	NA		Rn.8628	NA		NA				AI103119
A_44_P1007008	0.0277308	0.525323	0.0115486	0.430712	9.60422	10.0894	10.0368	P	P	P	10.3032	10.3517	9.95003	P	P	P	10.7174	11.416	11.2042	P	P	P	Ube2l6	Rattus norvegicus ubiquitin-conjugating enzyme E2L 6 (Ube2l6), mRNA [NM_001024755]	295704	TC578639	Rn.8609	68016327	chr3	68016268	+	rn|3q24	ENSRNOT00000044319	NM_001024755	ubiquitin-conjugating enzyme E2L 6	chr3:68016268-68016327	GO:0005515|GO:0051246|GO:0004842|GO:0000166|GO:0016874|GO:0005524|GO:0043687	NM_001024755
A_44_P227065	0.00632613	0.0813426	0.00281015	0.0571448	1.45618	2.23125	3.05147	A	A	A	2.64127	2.70127	3.27023	A	A	P	5.53793	6.88037	6.79426	P	P	P	Kif22	Rattus norvegicus kinesin family member 22 (Kif22), mRNA [NM_001009645]	293502	TC576379	Rn.8601	186205224	chr1	186205165	-	rn|1q36	ENSRNOT00000027525	NM_001009645	kinesin family member 22	chr1:186205224-186205165	GO:0005515|GO:0006281|GO:0000166|GO:0005874|GO:0005819|GO:0005634|GO:0003777|GO:0005524|GO:0003677|GO:0000785|GO:0007018	NM_001009645
A_44_P504298	0.00310805	0.664108	0.634658	1.06683	6.25907	5.77515	6.07512	P	P	P	5.28766	5.46326	5.34199	P	P	P	5.99267	5.81963	6.04806	P	P	P	Cdc42ep4	Rattus norvegicus CDC42 effector protein (Rho GTPase binding) 4 (Cdc42ep4), mRNA [NM_001107063]	303653	TC588278	Rn.8595	103368113	chr10	103368054	-	rn|10q32.1	ENSRNOT00000048264	NM_001107063	CDC42 effector protein (Rho GTPase binding) 4	chr10:103368113-103368054		NM_001107063
A_43_P10367	0.00568539	1.64745	0.00676952	1.33786	8.1842	8.39322	8.28854	P	P	P	8.43783	8.7579	8.56051	P	P	P	7.96277	7.77754	7.86748	P	P	P	Coro2b	Coro2b protein Fragment [Source:UniProtKB/TrEMBL;Acc:Q5EB67] [ENSRNOT00000020951]	300768	TC581372	Rn.8477	66573232	chr8	66573173	-	rn|8q24	ENSRNOT00000020951	XM_217183	coronin, actin binding protein, 2B	chr8:66573232-66573173		XM_217183
A_42_P506453	0.0282249	2.50986	0.275433	1.47381	4.23287	5.04807	5.35087	P	P	P	5.18422	5.76529	6.06852	P	P	P	4.22171	4.41209	4.52037	P	P	P		Q6AY99_RAT (Q6AY99) Aldo-keto reductase family 1, member B10 (Aldose reductase) (Predicted), partial (15%) [TC600159]	NA	TC600159	Rn.8475	61772727	chr4	61772668	+	rn|4q22		AW914895		chr4:061772668-061772727
A_44_P414170	0.00773823	0.643569	0.00163885	0.586459	11.889	11.8086	11.8384	P	P	P	11.8764	12.1598	11.8848	P	P	P	12.5786	12.5412	12.7208	P	P	P	Gpi	Rattus norvegicus glucose phosphate isomerase (Gpi), mRNA [NM_207592]	292804	TC620477	Rn.84435	86659182	chr1	86659123	-	rn|1q21	ENSRNOT00000032613	NM_207592	glucose phosphate isomerase	chr1:86659182-86659123	GO:0005515|GO:0019242|GO:0005975|GO:0046185|GO:0006094|GO:0005576|GO:0005625|GO:0001525|GO:0004347|GO:0005125|GO:0005615|GO:0006096|GO:0005829|GO:0043524|GO:0005737|GO:0016866|GO:0007611|GO:0048029|GO:0043154|GO:0019717|GO:0016853|GO:0051156|GO:0008083	NM_207592
A_42_P728925	0.000507829	0.586996	0.00191248	0.589854	11.5599	11.5049	11.3139	P	P	P	11.435	11.5161	11.416	P	P	P	12.2306	12.135	12.3042	P	P	P	Gpi	Rattus norvegicus glucose phosphate isomerase (Gpi), mRNA [NM_207592]	292804	TC595487	Rn.84435	86659392	chr1	86659333	-	rn|1q21	ENSRNOT00000032613	NM_207592	glucose phosphate isomerase	chr1:86659392-86659333	GO:0005515|GO:0019242|GO:0005975|GO:0046185|GO:0006094|GO:0005576|GO:0005625|GO:0001525|GO:0004347|GO:0005125|GO:0005615|GO:0006096|GO:0005829|GO:0043524|GO:0005737|GO:0016866|GO:0007611|GO:0048029|GO:0043154|GO:0019717|GO:0016853|GO:0051156|GO:0008083	NM_207592
A_44_P194166	0.0114544	1.87171	0.0850003	2.42911	8.27358	8.80723	7.47981	P	P	P	7.90322	8.14519	7.63418	P	P	P	7.09081	6.82991	7.07908	P	P	P	Dhh	Rattus norvegicus desert hedgehog homolog (Drosophila) (Dhh), mRNA [NM_053367]	84380	TC610782	Rn.84274	137672064	chr7	137672005	-	rn|7q36	ENSRNOT00000020563	NM_053367	desert hedgehog homolog (Drosophila)	chr7:137672064-137672005	GO:0005515|GO:0043627|GO:0005886|GO:0042552|GO:0005509|GO:0005102|GO:0007267|GO:0007286|GO:0050810|GO:0007275|GO:0005575|GO:0022402|GO:0007224|GO:0030238|GO:0033327|GO:0008233|GO:0008270|GO:0032355	NM_053367
A_44_P212785	0.04598	0.624191	0.0524035	0.784227	5.4553	5.53918	5.78136	P	P	P	4.87969	5.40937	5.45184	P	P	P	5.95734	6.08022	5.79645	P	P	P	Sgpp1	Sphingosine-1-phosphate phosphatase 1 (SPPase1)(Spp1)(EC 3.1.3.-)(Sphingosine-1-phosphatase 1) [Source:UniProtKB/Swiss-Prot;Acc:Q99P55] [ENSRNOT00000006913]	81536	TC617606	Rn.8423	98308591	chr6	98308532	-	rn|6q24	ENSRNOT00000006913	XM_001080791	sphingosine-1-phosphate phosphatase 1	chr6:98308591-98308532	GO:0006665|GO:0005794|GO:0005783|GO:0006670|GO:0005624|GO:0006915|GO:0003824|GO:0015629|GO:0042392|GO:0005739|GO:0016787|GO:0016020|GO:0016311|GO:0005789|GO:0016021|GO:0006668	XM_001080791
A_43_P16346	0.0489693	1.59669	0.0162561	1.65876	7.62077	8.05092	7.93564	P	P	P	7.77048	8.13632	7.49733	P	P	P	7.16209	7.35155	6.90198	P	P	P		Putative uncharacterized protein Fragment [Source:UniProtKB/TrEMBL;Acc:P97882] [ENSRNOT00000055977]	NA	NP067841	Rn.83634	44479155	chr12	44479096	+	rn|12q16	ENSRNOT00000055977	U89745		chr12:44479096-44479155
A_44_P231448	0.0201357	1.96108	0.0475586	2.98943	6.25772	5.62876	4.86948	P	P	P	4.69506	5.28423	5.20788	P	P	P	4.07185	4.41542	3.78347	P	P	A		Profilaggrin Fragment [Source:UniProtKB/TrEMBL;Acc:Q8CIU0] [ENSRNOT00000000449]	NA	NP070398	Rn.83620	186309144	chr2	186309088	+	rn|2q34	ENSRNOT00000000449	XM_238235		chr2:186309088-186309144		XM_238235
A_44_P194152	0.0438345	0.179796	0.0363065	0.156007	7.99404	7.76752	6.31928	P	P	P	7.34895	6.83241	8.4918	P	P	P	10.9469	8.77068	10.1446	P	P	P	Scd	Rattus norvegicus stearoyl-CoA desaturase (delta-9-desaturase) (Scd), mRNA [NM_031841]	83792	TC577111	Rn.83595	249365596	chr1	249365537	+	rn|1q54	ENSRNOT00000018090	NM_031841	stearoyl-CoA desaturase (delta-9-desaturase)	chr1:249365537-249365596	GO:0005792|GO:0031965|GO:0016020|GO:0005506|GO:0005783|GO:0042552|GO:0004768|GO:0016491|GO:0005789|GO:0006633|GO:0016021|GO:0055114	NM_031841
A_42_P465696	0.0395898	0.563771	0.908695	0.990889	6.98043	6.7449	7.29716	P	P	P	6.40368	5.75492	6.38691	P	P	P	6.87392	7.22676	6.99237	P	P	P	Reg4	Rattus norvegicus regenerating islet-derived family, member 4 (Reg4), mRNA [NM_001004096]	445583	TC603381	Rn.83573	193071443	chr2	193071384	+	rn|2q34	ENSRNOT00000025821	NM_001004096	regenerating islet-derived family, member 4	chr2:193071384-193071443	GO:0005488|GO:0005529|GO:0005576	NM_001004096
A_42_P508185	0.00927079	0.65219	0.000780652	0.538215	8.23924	8.14484	8.38667	P	P	P	8.34394	8.63489	8.61565	P	P	P	9.0858	9.25418	9.11672	P	P	P	Gimap5	Rattus norvegicus GTPase, IMAP family member 5 (Gimap5), transcript variant 2, mRNA [NM_145680]	246774	NP956350	Rn.83549	76843191	chr4	76843132	+	rn|4q24	ENSRNOT00000059156	NM_145680	GTPase, IMAP family member 5	chr4:76843132-76843191	GO:0046902|GO:0043066|GO:0032831|GO:0050995|GO:0001659|GO:0050868|GO:0002729|GO:0010524|GO:0045588|GO:0005741|GO:0005525|GO:0045838|GO:0005739|GO:0003674|GO:0002925|GO:0000166|GO:0016020|GO:0030217|GO:0045019|GO:0045954|GO:0043011|GO:0016021|GO:0043029|GO:0032689	NM_145680
A_43_P21225	0.0376605	0.47928	0.0142362	0.667764	4.35629	4.26075	4.53166	P	P	P	4.20377	3.96896	3.45599	P	P	P	4.95146	5.00567	4.95185	P	P	P	Dixdc1	Rattus norvegicus DIX domain containing 1 (Dixdc1), mRNA [NM_001037654]	363062	TC576502	Rn.8331	54037896	chr8	54037438	-	rn|8q23	ENSRNOT00000013787	NM_001037654	DIX domain containing 1	chr8:54037896-54037438	GO:0030054|GO:0021695|GO:0046330|GO:0003779|GO:0007275|GO:0031435|GO:0005622|GO:0043234|GO:0005737|GO:0043025|GO:0043679|GO:0050772|GO:0004871|GO:0016055|GO:0005925	NM_001037654
A_44_P772130	0.00172346	0.421663	0.000873045	0.500705	4.72905	4.92943	5.00567	P	P	P	4.6266	4.61894	4.68795	P	P	P	6.02764	5.84614	5.78721	P	P	P		Q3EX38_BACTI (Q3EX38) Quinolone resistance protein, partial (19%) [TC599073]	NA	TC599073	Rn.8327	86113229	chr2	86113170	+	rn|2q23		AW917766		chr2:086113170-086113229
A_44_P506635	0.033012	0.657317	0.0649476	0.858712	10.1567	10.0271	9.91788	P	P	P	9.87737	9.62791	9.41195	P	P	P	10.3265	10.2743	10.1654	P	P	P	Ifrd2	Rattus norvegicus interferon-related developmental regulator 2 (Ifrd2), mRNA [NM_001047871]	300994	TC583096	Rn.8306	112839568	chr8	112839509	+	rn|8q32	ENSRNOT00000022092	NM_001047871	interferon-related developmental regulator 2	chr8:112839509-112839568	GO:0005488	NM_001047871
A_44_P945456	0.0420606	2.46039	0.842697	1.01851	6.44719	5.97445	5.90975	P	P	P	7.64505	7.01098	7.48186	P	P	P	6.30014	5.32275	6.45298	P	P	P	Npas2	Rattus norvegicus neuronal PAS domain protein 2 (Npas2), mRNA [NM_001108214]	316351	TC584686	Rn.8285	38433943	chr9	38433884	+	rn|9q21	ENSRNOT00000059571	NM_001108214	neuronal PAS domain protein 2	chr9:38433884-38433943	GO:0005667|GO:0045475|GO:0006355|GO:0042745|GO:0045944|GO:0051879|GO:0004871|GO:0003677	NM_001108214
A_43_P12808	0.000938129	3.57764	0.687548	1.30299	3.36402	2.16234	1.76296	A	A	A	4.18338	3.83694	4.12274	P	P	P	2.19529	1.94207	2.46457	A	A	A	Cldn11	Rattus norvegicus claudin 11 (Cldn11), mRNA [NM_053457]	84588	TC577016	Rn.8282	116627517	chr2	116627458	-	rn|2q24	ENSRNOT00000014359	NM_053457	claudin 11	chr2:116627517-116627458	GO:0030054|GO:0016338|GO:0005886|GO:0005198|GO:0016021|GO:0007283|GO:0005923|GO:0008366|GO:0007155|GO:0042802	NM_053457
A_43_P13346	0.00474101	0.348824	0.0701624	0.790357	3.93254	3.71623	4.0836	P	P	P	3.04087	2.67216	2.438	A	A	A	4.14908	4.18429	4.42481	P	P	P	Prokr2	Rattus norvegicus prokineticin receptor 2 (Prokr2), mRNA [NM_138978]	192649	TC579197	Rn.82760	120139577	chr3	120139518	-	rn|3q36	ENSRNOT00000028889	NM_138978	prokineticin receptor 2	chr3:120139577-120139518	GO:0004983|GO:0005886|GO:0004930|GO:0007623|GO:0004872|GO:0016021	NM_138978
A_44_P508055	0.0343158	0.604585	0.446246	0.882182	4.62308	4.26297	5.0557	P	P	P	3.87606	4.41209	4.07615	P	P	P	4.94641	4.81059	4.83302	P	P	P	Bcl2l11	Rattus norvegicus BCL2-like 11 (apoptosis facilitator) (Bcl2l11), transcript variant 3, mRNA [NM_171988]	64547	TC590906	Rn.82709	115722665	chr3	115722606	+	rn|3q36	ENSRNOT00000051069	NM_171988	BCL2-like 11 (apoptosis facilitator)	chr3:115722606-115722665	GO:0005739|GO:0005515|GO:0008633|GO:0008624|GO:0046982|GO:0016020|GO:0005886|GO:0006915|GO:0006917|GO:0005829	NM_171988
A_44_P498795	0.048698	0.501638	0.0389884	0.586231	12.9767	12.5511	13.2051	P	P	P	13.0515	12.1638	12.7805	P	P	P	13.5583	13.7168	13.8307	P	P	P	LOC100125372	Rattus norvegicus carboxylesterase ES-4 (LOC100125372), mRNA [NM_001103359]	100125372	TC649874	Rn.82692	14874689	chr19	14874630	+	rn|19p11	ENSRNOT00000024187	NM_001103359	carboxylesterase ES-4	chr19:14874630-14874689	GO:0016787|GO:0005783|GO:0005788	NM_001103359
A_44_P311096	0.0448934	1.92989	0.00619763	1.60722	9.65887	9.34871	9.59785	P	P	P	9.42269	9.6699	10.2084	P	P	P	8.97939	8.68444	8.89061	P	P	P	Abcb4	Rattus norvegicus ATP-binding cassette, sub-family B (MDR/TAP), member 4 (Abcb4), mRNA [NM_012690]	24891	NP069384	Rn.82691	22003326	chr4	22000547	+	rn|4q12	ENSRNOT00000043822	NM_012690	ATP-binding cassette, sub-family B (MDR/TAP), member 4	chr4:22000547-22003326	GO:0005515|GO:0042493|GO:0005624|GO:0051384|GO:0055085|GO:0005524|GO:0008559|GO:0016324|GO:0046581|GO:0000139|GO:0000166|GO:0016020|GO:0016787|GO:0016021|GO:0016887	NM_012690
A_44_P238210	0.0327986	1.96164	0.170936	1.28244	11.1222	10.9406	11.0324	P	P	P	11.6215	11.6742	11.6442	P	P	P	10.5013	10.4257	11.0216	P	P	P	Mid1ip1	Rattus norvegicus MID1 interacting protein 1 (gastrulation specific G12 homolog (zebrafish)) (Mid1ip1), mRNA [NM_206950]	404280	TC576858	Rn.8267	24206087	chrX	24206028	-	rn|Xq13	ENSRNOT00000004305	NM_206950	MID1 interacting protein 1 (gastrulation specific G12 homolog (zebrafish))	chrX:24206087-24206028	GO:0005737|GO:0015630|GO:0005874|GO:0007026|GO:0005634|GO:0008022	NM_206950
A_44_P238204	0.0310703	1.84178	0.151335	1.29774	12.4945	12.4175	12.2665	P	P	P	12.9389	12.9611	12.7977	P	P	P	11.8558	11.7732	12.3587	P	P	P	Mid1ip1	Rattus norvegicus MID1 interacting protein 1 (gastrulation specific G12 homolog (zebrafish)) (Mid1ip1), mRNA [NM_206950]	404280	TC576858	Rn.8267	24205814	chrX	24205755	-	rn|Xq13	ENSRNOT00000004305	NM_206950	MID1 interacting protein 1 (gastrulation specific G12 homolog (zebrafish))	chrX:24205814-24205755	GO:0005737|GO:0015630|GO:0005874|GO:0007026|GO:0005634|GO:0008022	NM_206950
A_44_P288982	0.0278665	0.535832	0.0993478	0.819802	7.14848	6.91976	7.29799	P	P	P	6.85933	6.35049	6.2671	P	P	P	7.52421	7.30641	7.41225	P	P	P	Zbtb8a	Rattus norvegicus zinc finger and BTB domain containing 8a (Zbtb8a), mRNA [NM_001107913]	313049		Rn.82564	148510574	chr5	148510515	-	rn|5q36	ENSRNOT00000010983	NM_001107913	zinc finger and BTB domain containing 8a	chr5:148510574-148510515	GO:0005622|GO:0005515|GO:0008150|GO:0003674|GO:0008270|GO:0005634|GO:0005575|GO:0003677|GO:0046872|GO:0045449	NM_001107913
A_44_P168543	0.0319378	2.24875	0.55347	1.1962	5.38209	6.12032	5.18422	P	P	P	6.87255	6.54351	6.06762	P	P	P	5.47639	5.24633	5.35532	P	P	P	Bnipl	Rattus norvegicus BCL2/adenovirus E1B 19kD interacting protein like (Bnipl), mRNA [NM_001128187]	361994		Rn.82427	190155760	chr2	190155701	-	rn|2q34	ENSRNOT00000056388	NM_001128187	BCL2/adenovirus E1B 19kD interacting protein like	chr2:190155760-190155701		NM_001128187
[truncated: 1,959 more rows]

## Sheet: additional file 3
Probe Name	p Values	Fold Change(M/C)	p Values	Fold Change(M/C)	H21_NS	H22_NS	H23_NS	H21_flags	H22_flags	H23_flags	M1_NS	M3_NS	M5_NS	M1_flags	M3_flags	M5_flags	C41_NS	C42_NS	C43_NS	C41_flags	C42_flags	C43_flags	GeneSymbol	Description	EntrezGeneID	TIGRID	UniGeneID	Chromosome_End_Index_Avadis_	Chromosome_Number_Avadis_	Chromosome_Start_Index_Avadis_	Chromosome_Strand_Avadis_	Cytoband	EnsemblID	GenbankAccession	GeneName	GenomicCoordinates	Go	RefSeqAccession
[truncated: 1,398 more rows]
